# Supplementary material for: Plasma metabolomics reveals membrane lipids, aspartate/asparagine and nucleotide metabolism pathway differences associated with chloroquine resistance in Plasmodium vivax malaria
Source: PLoS One. 2017 Aug 16;12(8):e0182819. doi: 10.1371/journal.pone.0182819 (PMC5559093; doi:10.1371/journal.pone.0182819)
Supplement: S1 Table — (XLSX) [file pone.0182819.s001.xlsx]

## Sheet: S1_table
SampleID							2007260	2008613	2008625	2008629	2008652	2008674	2008678	2008712	2008727	2009203	2009226	2009249	2009255	2009263	2009267	2007278	2008603	2008618	2008621	2008622	2008623	2008624	2008627	2008628	2008631	2008651	2008654	2008660	2008676	2008680	2008709	2008710	2008721	2008722	2009109	2009110	2009212	2009225	2009228	2009233	2009253	2009254	2009261
Age (human_age)							5	35	46	21	22	41	15	54	42	13	16	43	25	37	10	46	39	5	36	21	59	10	38	43	28	35	64	38	50	36	33	22	12	23	32	41	42	59	63	22	32	27	62
Gender (human_gender)							Male	Male	Male	Female	Female	Female	Male	Male	Male	Male	Male	Male	Male	Male	Male	Female	Male	Male	Male	Male	Female	Female	Female	Female	Male	Female	Male	Male	Male	Male	Male	Male	Male	Male	Male	Male	Male	Male	Male	Male	Male	Male	Male
Result (human_susceptibl_result)							Resistant	Resistant	Resistant	Resistant	Resistant	Resistant	Resistant	Resistant	Resistant	Resistant	Resistant	Resistant	Resistant	Resistant	Resistant	Susceptible	Susceptible	Susceptible	Susceptible	Susceptible	Susceptible	Susceptible	Susceptible	Susceptible	Susceptible	Susceptible	Susceptible	Susceptible	Susceptible	Susceptible	Susceptible	Susceptible	Susceptible	Susceptible	Susceptible	Susceptible	Susceptible	Susceptible	Susceptible	Susceptible	Susceptible	Susceptible	Susceptible
Thick smear (par/ul) (human_thick_smear)							5776	2105.6	5059.2	1345.6	13691.6	676.8	408	690	686	2582.1	78	827.2	1974.72	2548	1136.8	3372.8	345	594	4423.3	1587.3	3128	1713.6	1456	3100.8	1932	7023.4	2620.8	2849.2	323	2012.8	513	1465	680.8	8037.2	1384.6	978.2	3840	2814	4588	1472	3590.4	2624	1279.2
Gametocytes (human_gametocytes)							91.2	112	102	23.2	25.83	28.2	0	0	0	90.6	0	56.4	149.6	78.4	0		0	0	161.98	40.7	54.4	81.6	0	0	56	238.3	33.6	32.5	38	40.8	45.6	25	18.4	327.44	23	80.4	51.2	0	0	27.6	179.52	0	0
Leucocytes (human_leucocytes)							7600	5600	5100	5800	6200	4700	2400	4600	7000	4530	2600	4700	7480	4900	4900	6200	7500	6600	6230	4070	6800	5100	9100	7600	7000	6000	8400	2600	1900	6800	5700	2500	4600	6400	2300	6700	6400	6700	7400	4600	7480	6400	7800
Creatinine (mg/dL) (creatinine)							0.3	0.8	0.6	0.7	0.8	1	1.4	1.5	0.9	0.6	0.9	0.7	1	1.2	0.7	0.6	1.1	0.5	0.7	1.1	0.7	0.5	0.9	0.9	1	0.7	0.9	1	0.8	0.8	1.1	1.2	0.7	1.1	0.9	1.3	0.9	0.9	1.2	0.8	0.7	1.3	1.4
Glucose (mg/dL) (glucose)							121	127	296	94	113	124	111	121	87	91	123	263	139	118	134	91	119	101	101	164	172	149	94	184	100	84	110	153	114	62	155	142	159	169	129	165	108	201	138	96	139	113	181
Total Bilirubin (mg/dL) (bilirubin_total)							0.39	1.75	1.1	1.01	1.86	0.54	0.94	0.61	1.32	0.92	0.95	1.38	0.4	1.06	0.78	1.12	1.35	0.37	1.32	1.3	0.9	0.9	0.61	2.94	0.68	3.55	2.28	3.52	1.5	0.37	0.7	1.46	0.52	4.22	0.79	0.79	0.91	1.27	1.54	1.92	1.33	3	0.95
Hemoglobin (g/dl) (hemoglobin)							10.7	14.7	12.9	13.9	12.4	13.6	14.6	14	14.2	12.42	13.5	12.2	15.13	14	9.4	11.4	14	11.3	15.47	13.42	11.8	11.4	14.3	14.5	13.1	12.6	14.8	13.7	13.6	14.6	16.5	15.7	12.1	13.8	9.9	14	13.9	14.8	13.8	12.7	13.89	13.9	14.5
Platelets (per ul) (platelets)							63000	86000	52000	51000	92000	232000	32000	192000	130000	57000	145000	42000	72000	111000	89000	134000	203000	232000	152000	86000	132000	101000	318000	216000	105000	89000	143000	78000	109000	216000	143000	161000	234000	45000	79000	40000	111000	229000	102000	130000	75000	135000	154000
ALT (Liver enzymes u/L ) (liver_transaminases)							18	25	30	21	35	83	46	84	20	24	85	63	27	46	10	31	21	26	32	35	14	20	24	20	21	31	90	41	39	33	85	97	18	59	30	14	14	28	37	49	12	29	25
raw.fold.change (meanResistance/meanSusceptible)	log2.fold.change (meanResistant-meanSusceptible)	P.value	FDR.adjusted.P.value	VIP	mz	time	2007260_1	2008613_1	2008625_1	2008629_1	2008652_1	2008674_1	2008678_1	2008712_1	2008727_1	2009203_1	2009226_1	2009249_1	2009255_1	2009263_1	2009267_1	2007278_1	2008603_1	2008618_1	2008621_1	2008622_1	2008623_1	2008624_1	2008627_1	2008628_1	2008631_1	2008651_1	2008654_1	2008660_1	2008676_1	2008680_1	2008709_1	2008710_1	2008721_1	2008722_1	2009109_1	2009110_1	2009212_1	2009225_1	2009228_1	2009233_1	2009253_1	2009254_1	2009261_1
0.284151	-1.81527	4.12556e-05	0.0203253	3.41203	1306.93	422.1	20.09	20.31	17.74	17.79	17.87	17.73	19.68	17.78	17.7	17.71	17.77	17.85	17.82	21.19	19.02	21.45	21.51	17.59	19.9	20.93	20.83	20.78	20.52	20.52	20.64	20.93	20.86	21.45	17.99	20.89	21.45	20.78	20.33	19.84	20.03	20.29	20.5	21.31	21.04	21.1	17.85	20.6	20.59
0.198748	-2.33099	2.01462e-05	0.0203253	3.26911	770.969	417.6	23.33	23.04	18.92	19.1	19.23	19.04	22.86	19.07	18.95	19.08	19.13	19.23	19.03	23.48	20.4	22.11	19.02	23.37	19.12	23.26	22.75	22.7	23.35	23.69	23.45	22.88	23.11	23	19.32	23.28	23.09	23.18	23.45	22.68	22.57	22.81	22.93	23.35	23.11	23.18	23.26	23.48	23.31
0.364372	-1.45652	0.00011338	0.0327625	3.19997	1515.98	417.2	17.91	16.51	16.75	16.73	16.79	16.69	18.63	16.66	16.66	16.59	16.79	20.42	16.89	18.52	16.93	19.09	16.87	19.8	19.19	19.2	18.95	16.91	19.89	16.82	18.93	19.26	19.8	19.32	16.99	19.55	18.96	19.73	19.14	18.55	18.79	18.25	18.12	19.48	18.59	18.22	18.62	19.76	18.96
0.168427	-2.56981	4.0015e-05	0.0203253	3.16957	511.357	453.5	21.68	22.37	17.84	17.92	18	17.86	21.97	17.92	17.83	17.84	21.82	17.98	22.7	23.62	19.14	23.48	17.92	23.66	22.26	23.42	22.27	22.02	22.47	22.58	23.18	22.22	22.81	22	18.12	22.71	22.73	23.26	22.93	22.77	21.92	22.43	23.87	23.48	22.3	23.11	22.47	23	23.62
0.385274	-1.37604	4.66634e-05	0.0203253	3.12064	980.762	42.2	19.25	19.01	16.65	16.62	16.67	16.58	18.98	16.55	19.08	16.47	18.66	16.71	16.79	18.51	19.61	20.87	16.77	18.75	19.74	17.75	19.74	19.74	18.87	19.37	19.21	19.56	19.57	19.55	16.88	19.19	18.88	19.32	19.45	19.64	19.76	19.46	19.08	19.13	18.72	19.63	19.76	19.3	18.4
0.3603	-1.47273	0.000182698	0.0428497	3.07592	1075.76	41.9	17.5	17.45	16.1	16.02	16.04	16.02	17.06	15.9	16.02	15.8	16.19	16.13	17.2	17.16	18.19	19.98	16.27	15.96	19.81	18.36	19.89	16.3	18.73	16.16	17.58	17.99	19.06	17.96	16.31	16.8	18.4	17.75	18.46	15.73	18.9	17.7	18.7	18.85	17.58	18.79	19.48	18.43	17.85
0.425511	-1.23273	6.93287e-05	0.0264229	3.06983	645.501	462.5	16.25	16.69	14.46	14.13	14.11	14.23	15.38	14.11	14.19	13.74	14.69	14.49	14.65	15.64	17.12	17.01	14.79	17.03	14.32	16.52	16.16	16.41	17.1	14.55	16.52	15.97	16.86	16.08	14.58	16.06	16.47	16.48	16.85	17.05	17.14	16.67	15.57	16.43	16.76	16.61	15.41	16.13	16.86
0.305487	-1.71082	0.000375424	0.0572334	3.0229	516.306	383.9	17.49	20.56	17.33	17.34	17.37	20.96	20.92	17.3	21.41	19.48	17.37	17.4	20.94	21.07	18.58	21.28	17.4	21.4	21.26	21.39	20.46	20.18	21.35	20.87	21.06	21.35	17.2	20.99	20.58	21.02	21.36	21.18	20.55	20.66	20.42	20.69	20.77	20.87	21.34	20.79	20.1	21.26	21.46
0.165977	-2.59095	0.000469292	0.0681093	3.01405	693.435	436.2	17.35	11.36	17.73	11.22	11.04	16.75	11.45	16.54	16.95	17.43	12.43	17.71	16.63	17.17	12.05	18.34	18.69	17.93	16.97	18.1	17.8	17.41	17.9	12.18	16.57	17.71	18.52	18.08	18.07	17.14	17.86	13.97	18.55	17.89	16.92	18.54	16.39	17.4	18.79	17.88	17.29	17.83	17.93
0.199353	-2.3266	0.000118199	0.0327625	2.99262	792.509	431.2	16.76	12.79	13.38	12.88	12.82	13.05	17.94	12.85	17.53	12.54	13.86	16.81	13.61	18.43	13.53	17.45	13.78	17.27	17.99	18.85	17.48	14.94	15.98	13.62	17.86	18.31	17.47	16.53	17.82	18.11	18.24	17.5	18.19	17.08	16.69	14.47	17.27	17.39	14.28	18.51	16.79	16.59	18.47
0.216576	-2.20705	0.000111025	0.0327625	2.9657	510.354	452.8	23.94	24.34	20.35	20.53	20.69	20.45	23.66	20.43	20.29	20.48	20.6	20.63	24.81	25.25	21.92	25.05	20.47	24.96	24.51	25.05	20.75	24.29	24.51	24.43	25.05	24.08	24.81	24.18	20.77	24.65	24.81	25.05	24.81	24.65	24.34	20.78	25.37	25.05	24.38	25.37	24.58	24.73	25.67
0.341571	-1.54974	0.00102928	0.0871743	2.92491	276.653	416.2	17	16.66	15.34	15.29	15.3	19.11	16.88	15.13	17.7	14.92	17.9	15.42	15.57	18.29	16.51	18.76	15.6	18.34	18.31	18.8	17.23	19.75	18.3	19.02	18.29	18.04	17.95	17.16	17.76	18.69	19.01	15.5	18.27	17.66	16.88	15.83	17.31	19.33	18.82	17.63	18.87	18.59	18.91
0.388915	-1.36247	0.000302298	0.0572334	2.90628	822.685	584.9	16.48	15.85	12.28	12.85	16.36	12.05	16.46	15.93	16.4	15.98	16.51	12.34	14.05	16.26	16.75	17.08	17.33	16.26	16.62	16.74	16.47	16.3	16.49	16.65	16.79	16.28	16.42	15.5	16.8	16.18	16.14	16.47	16.2	16.48	16.57	16.86	16.13	16.11	16.87	16.56	16.5	16.08	16.79
0.352055	-1.50613	0.000329121	0.0572334	2.85897	338.341	551.1	17.14	16.8	13.69	13.12	13.12	13.32	17.13	14.9	15.73	12.85	16.62	13.62	13.86	13.66	15.84	16.98	15.76	16.53	15.47	17.27	17.27	16.28	16.54	14.78	16.96	16.23	16.01	16.55	17.83	16.35	13.7	14.43	17.08	16.33	17.06	14.66	17.17	16.88	16.55	16.45	17.25	16.23	14.44
1.84595	0.884366	0.000131452	0.0333998	2.85734	571.883	515.3	16.55	16.75	16.13	16.02	16.05	16.45	15.47	16.38	15.81	16.63	16.17	16.74	17.18	15.97	16.73	16.47	16.05	14.89	15.91	14.57	16.33	14.61	16.41	16.17	14	15.44	16.25	14.59	15.84	15.43	15.91	14.64	15.36	15.75	14.17	17	15.98	15.08	14.64	14.28	16.46	15.85	14.71
3.90812	1.96647	0.000793921	0.07459	2.85478	600.504	459.7	17.06	16.64	18.06	17.46	17.61	17.91	17.35	16.09	15.42	15.9	18.23	17.16	17.57	13.43	18.67	14.35	13.76	13.17	18.15	14.12	16.81	14.2	16.19	16.59	13.45	16.75	17.74	17.07	18.51	14.55	13.45	14.27	17.5	16.9	13.56	14.45	14.89	12.53	14.26	13.83	15.77	13.68	14.2
0.237897	-2.07159	4.52596e-05	0.0203253	2.83448	755.584	586.5	16.64	11.33	11.64	12.25	10.99	11.43	16.39	11.36	16.51	15.53	12.38	11.83	15.09	16.14	16.45	15.69	15.72	16.52	16.25	17.16	15.5	15.97	16.45	12.15	16.57	15.73	16.21	16.01	11.85	16.55	16.09	15.91	15.68	15.82	15.99	16.38	16.08	15.84	16.3	15.9	16.2	16.25	16.68
0.283745	-1.81733	0.000355526	0.0572334	2.82175	1333.96	432	17.8	15.69	14.08	18.12	13.73	13.76	17.26	14.83	18.79	17.99	14.4	14.07	14.32	17.88	14.17	19.15	18.06	18.54	18.63	18.55	17.51	18.04	16.39	14.21	17.92	17.53	17.98	18.62	17.26	18.36	18.46	18.48	18.31	16.71	15.93	16.73	17.9	18.37	17.14	17.87	18.51	18.74	18.24
0.395893	-1.33682	0.000536118	0.0681093	2.8069	1133.6	431.7	18.23	18.25	16	18.79	15.93	15.91	17.57	15.79	15.89	15.66	16.11	16.04	16.18	18.89	17.19	18.37	16.18	15.87	17.6	19.01	18.41	18.71	18.64	18.67	19.14	18.22	17.95	18.18	16.2	18.33	18.34	19.09	19.17	17.77	17.53	18.46	19.09	19.28	19.03	18.33	18.49	19.06	19
0.346355	-1.52968	2.56669e-05	0.0203253	2.80146	761.048	49.5	17.16	15.09	15.44	15.38	15.39	15.39	18.26	15.25	15.3	19.12	15.62	15.51	15.69	17.69	19.26	17.81	15.68	18.77	15.39	18.19	17.5	18.57	18.21	15.52	17.95	18.86	18.64	18.74	15.62	18.69	19.12	18.54	17.92	18.26	18.49	19.32	18.61	18.32	18.78	17.8	18.87	18.58	16.77
0.329931	-1.59976	1.67509e-05	0.0203253	2.79243	804.608	515.7	16.58	13.64	14.15	13.69	13.81	13.82	16.85	13.73	13.82	16.87	15.6	14.16	16.58	17.29	16.92	17.87	14.51	18.21	16.98	16.92	17.93	16.93	17.03	14.26	18.3	15.66	15.9	18.03	14.24	16.5	17.29	17.78	18.12	17.47	17.41	17.77	15.91	14.67	18.37	16.29	16.8	16.81	17.29
0.277579	-1.84903	0.000757647	0.07459	2.78835	882.518	374.4	14.39	13.72	14.25	13.86	15.76	13.97	13.97	13.86	13.96	18.08	14.51	17.47	17.5	17.33	14.32	18.15	14.61	18.08	17.78	17.2	17.61	14.82	18.28	14.36	15.24	17.21	17.18	16.54	17.71	18.04	17.32	17.77	13.96	17.57	14.47	18.27	16.79	17.32	19.46	18.08	15.24	18.14	17.68
0.435879	-1.198	0.000719402	0.07459	2.76909	987.194	51.1	17.38	15.94	15.05	14.94	14.99	15	17.32	14.84	16.74	14.53	15.29	17.77	17.71	17.1	17.08	15.79	18.34	18.4	16.34	17.91	17.01	17.57	17.35	17.03	17.54	17.76	17.89	17.21	18.51	17.83	17.84	15.31	17.22	17.41	16.4	15.6	17.85	17.74	17.98	17.59	18.23	16.84	18.44
0.541419	-0.885183	0.00081609	0.07459	2.76603	791.595	482.1	16.72	16.6	15.23	15.15	15.19	17.37	16.3	15.03	15.13	16.75	15.44	15.31	17.86	16.54	16.42	17.76	16.83	17.57	15.19	16.69	17.56	16.81	17.38	16.71	17.26	16.68	17.31	17.55	15.45	16.16	17.21	17.47	17.77	17.43	17.79	17.32	16.66	17.18	16.87	16.65	17.04	16.99	17.17
0.510468	-0.970108	0.00263024	0.135765	2.7535	578.876	48.4	16.85	17.59	17.54	17.57	18.02	16.65	17.77	18.15	17.31	16.83	17.83	15.3	15.46	17.18	16.4	18.61	17.68	17.59	18.59	17.15	18.64	18.66	18.01	17.47	17.15	17.87	18.27	18.95	18.89	17.52	18.11	18.97	17.36	18.33	18.41	17.8	18.39	18.19	19.19	19.15	15.18	17.73	19.04
0.331954	-1.59095	0.000233265	0.0508018	2.68024	803.807	41.5	18.33	18.89	15.23	15.15	15.19	15.18	17.54	15.03	15.13	14.77	15.44	15.31	17.73	17.56	15.33	19.09	15.51	15.17	15.19	16.5	17.91	19.1	18.98	15.33	17.84	18.59	17.59	17.89	15.45	16.37	17.86	18.98	18.4	17.88	18.63	18.83	17.24	18.22	18.55	19.74	19.77	18.15	18.24
0.343614	-1.54114	0.00112025	0.0898855	2.67679	353.012	65.1	15.86	12.35	12.81	12.36	16.28	12.47	16.05	12.22	12.46	13.64	13.4	12.87	15.53	16.42	13.1	17.24	14.24	16.57	14.84	14.74	15.72	16.27	16	14.18	16.15	16.38	14.95	16.23	14.17	16.88	15.88	14.01	15.72	12.37	16.75	14.07	16.34	15.11	15.87	16.21	15.28	15.28	15.1
2.43024	1.2811	0.00462522	0.17851	2.67151	612.247	434.5	20.63	20	20.14	20.15	20.15	19.61	20.03	20.17	20.23	20.71	19.89	20.34	20.31	20.63	20.37	19.09	20.22	20.12	19.57	17.6	19.84	18.58	17.32	20.01	17.48	20.22	17.36	20.22	20.23	17.25	17.46	17.28	17.41	20.35	20.4	20.59	20.25	17.31	20.29	17.51	20.14	17.39	17.67
3.92967	1.97441	0.0012208	0.090786	2.6653	644.492	399.6	16.9	17.76	16.37	14.13	17.96	12.82	16.7	17.88	19.12	18.11	19.36	18.74	16.06	17.51	16.88	15.59	13.5	11.72	16.89	12.85	16.54	15.24	16.09	13.28	12.22	14.61	16.1	15.56	17.37	16.31	16.59	13.16	16.35	16.58	14.9	17.62	16.41	15.65	14.44	12.6	16.84	15.85	16.45
0.422818	-1.24189	0.00206744	0.116734	2.65543	518.835	48.4	17.7	16.9	13.79	14.57	18.43	18.72	17.67	13.3	18.45	17.43	17.75	16.61	17.58	18.72	16.65	19.2	18.15	18.6	18.86	18.31	18.09	17.32	17.84	17.05	17.9	18.93	18.32	18.98	19.47	17.89	18.7	18.2	18.28	18.89	17.91	17.23	17.86	17.81	18.02	17.94	18.32	17.41	19.37
0.256435	-1.96333	0.000562541	0.0686075	2.62717	644.109	445.1	16.02	13.4	15.32	11.95	10.69	12.68	15.96	10.92	10.92	10.51	12.09	15.77	14.11	16.38	11.68	15.85	13.57	14.02	12.84	16.02	15.6	15.43	16.17	11.88	15.96	14.89	14.51	15.16	17.67	17.02	15.33	15.97	17.03	15.84	15.89	15.96	15.83	14.34	12.36	15.09	15.01	13.47	17.8
0.263013	-1.9268	0.000853491	0.07459	2.58815	561.878	40.9	17.44	18.58	13.92	17.6	13.47	17.08	17.01	13.45	13.6	13.08	14.27	13.84	14.14	18.76	14	16.77	17.63	14.77	15.08	15.41	17.15	18	19.13	14.07	17.02	19.04	17.76	18.01	18.32	13.02	16.96	18.4	16.71	17.41	18.15	19.19	17.5	18.67	17.22	18.48	18.78	18.39	17.64
0.438944	-1.18789	0.00145254	0.100655	2.56341	938.778	42	20.63	20.27	17.77	17.83	17.92	17.77	20.01	17.83	20.39	17.76	17.82	17.89	17.86	20.53	20.4	21.61	17.85	20.66	17.82	18.75	21.33	20.53	20.34	20.07	20.61	19.83	20.98	20.59	18.03	19.92	19.52	20.14	20.93	20.48	19.85	20.36	19.39	20.1	20.12	20.8	20.83	20.48	20.51
0.339525	-1.55841	0.000823552	0.07459	2.55704	105.954	588.3	20.03	16.71	15.95	18.79	18.96	17.57	19.39	15.75	15.83	15.59	16.06	19.39	16.16	15.89	16.07	18.71	20.1	19.11	19.62	16.19	16.06	19.34	19.71	16.02	18.84	18.92	19.37	15.59	19.65	18.11	18.78	18.86	15.8	19.96	20.27	20.21	19.94	18.63	19.04	19.91	18.95	19.31	19.94
0.360762	-1.47088	0.000712302	0.07459	2.55448	1447.9	482.8	16.99	12.57	13.14	12.59	12.52	12.77	15.11	12.51	12.75	12.28	13.6	15.01	13.35	15.36	13.34	15.91	15.08	16.34	14.99	17.11	15.48	16.66	12.13	13.45	16.18	14.07	15.2	16.64	13.14	13.94	16.04	16.11	17.39	12.61	15.83	15.08	14.72	15.57	15.02	15.04	15.34	13.4	16.36
0.322362	-1.63325	0.00436584	0.175151	2.52148	179.07	255.1	14.38	12.05	12.41	12.01	14.05	17.13	15.19	11.99	12.01	11.57	15.07	15.05	16.78	12.66	12.69	16.22	15.82	17	16.16	16.59	16.36	15.44	15.85	12.85	14.24	16.44	14.86	13.05	12.55	14.77	15.52	14.36	11.88	15.16	17.08	13.79	16.4	16.29	16.51	13.18	16.01	15.75	16.29
3.21054	1.68282	0.00260212	0.135765	2.52054	832.781	43.6	14.05	16.75	18.43	17.31	13.45	16.83	17.06	17.84	17.62	13.04	16.83	18.52	16.7	17.15	17.98	14.79	14.22	13.66	14.77	14.51	13.91	15.98	13.07	14.04	17.8	17.2	17.6	14.77	13.87	12.99	16.69	17.32	13.5	13.2	16.64	17.09	13.34	16.61	14.58	16.76	15.19	12.96	14.63
0.467108	-1.09817	0.000609889	0.0715212	2.51047	296.65	417.3	21.85	21.66	19.09	19.27	19.37	19.19	21.57	19.24	19.11	19.25	19.31	19.4	19.17	22.03	20.89	20.63	19.2	19.01	19.28	21.75	21.46	20.49	21.58	19.28	21.73	21.76	21.55	21.6	19.53	21.56	21.62	21.57	21.69	21.39	21.82	21.6	21.69	21.7	21.83	21.84	21.59	21.66	21.96
0.305036	-1.71295	0.00109887	0.0898855	2.49275	199.123	571.1	16.75	12.5	13	12.51	12.42	12.71	15.86	12.41	12.64	12.07	16.77	13.05	16.38	16.09	16.02	15.46	13.52	12.81	12.82	16.45	17.4	16.33	16.88	13.36	15.98	16.07	13.79	16.01	12.99	16.53	16.83	16.69	16.33	15.52	17.2	15.4	16.31	16.91	17.82	17.18	17.1	16.88	17.55
0.372111	-1.42619	0.00492783	0.187812	2.48589	1005.69	445	18.66	17.78	16.23	16.17	16.21	19.95	19.05	16.07	20.12	17.31	16.33	16.27	16.4	20.13	16.39	19.8	16.4	20.72	17.21	20.3	18.29	18.52	19	16.31	19.7	18.36	17.99	17.76	18.09	19.29	19.97	20.43	19.09	18.81	18.73	19.08	20.66	20.42	19.42	19.79	17.75	19.99	20.43
0.0850663	-3.55527	0.00026134	0.0531217	2.48376	899.77	42.1	18.1	16.73	9.15	8.92	8.63	9.01	17.63	8.84	8.52	15.87	17.32	12.48	18.12	8.92	18.81	18.49	19	18.75	9.35	17.5	18.59	18.36	17.19	10.54	19.05	18.01	16.6	17.42	9.21	15.92	14.94	18.28	17.17	16.7	16.21	17.79	17.71	19.37	18.75	16.6	17.45	17.82	18.54
0.412502	-1.27753	0.0011975	0.090786	2.47456	996.691	417.1	19.11	18.26	15.94	19.08	15.87	15.86	17.79	15.74	15.82	19.04	19.52	15.98	19.33	19.5	16.06	18.63	16.13	19.74	19.29	19.26	18.06	18.36	19.35	19.72	18.77	18.59	17.24	16.73	19.15	19.51	19.2	19.85	18.81	18.8	18.59	19.02	19.82	19.78	19.77	19.58	19.12	19.5	19.19
0.441463	-1.17963	0.000856231	0.07459	2.46879	769.971	417.9	19.23	18.43	16.11	19.28	16.08	16.06	18.73	15.94	16.05	15.85	19.16	18.79	19.53	19.56	17.32	18.71	16.3	19.52	18.65	19.42	18.69	18.87	19.26	19.58	19.32	19.08	19.39	19.23	16.35	19.39	19.35	19.42	19.35	19.15	18.64	19.21	19.27	19.33	19.32	19.19	18.61	19.56	19.52
2.00953	1.00686	0.00407539	0.167697	2.46287	191.885	523.3	18	17.14	17.31	16.54	17.21	17.76	17.92	17.32	17.39	17.91	16.89	18.19	17.52	17.7	18.34	16.64	17.93	17.35	16.66	17.69	15.08	15.39	14.57	15.12	17.74	17.7	17.62	17.13	15.22	16.27	17.09	15.25	14.92	16.29	15.27	15.57	17.63	17.53	17.5	17.62	17.75	17.63	15.61
0.502076	-0.994022	0.00121104	0.090786	2.45965	1091.6	413.8	18.72	18.73	16.53	19.15	16.53	16.45	18.93	16.4	18.81	16.3	16.58	16.57	18.71	18.54	16.68	19.6	16.66	18.78	18.73	19.79	18.66	19.19	19.21	16.62	18.95	18.74	18.7	18.41	16.75	18.92	19	18.3	19.3	18.35	18.84	18.09	18.97	18.9	18.98	17.53	18.83	19.2	19.19
0.265463	-1.91342	0.0285076	0.448193	2.45673	182.089	327.5	14.47	11.63	14.21	13.83	11.33	15.91	11.85	14.71	13.94	11.12	12.63	14.55	17.16	13.36	12.31	17.4	16.77	16.64	17.77	14.77	16.93	15.85	14.83	16.81	16.55	13.9	15.88	15.65	12.09	13.7	14.67	16.62	16.98	15.17	18.24	13.38	17.54	17.6	17.23	14.25	11.71	12.44	18.31
0.119105	-3.0697	0.00237508	0.129315	2.45396	483.362	456.3	20.72	20.96	14.05	20.61	13.67	13.73	21.54	13.62	22.23	13.28	14.38	14.04	21.79	22.01	15.11	21.63	14.45	22.43	19.73	22.14	19.87	20.71	22.03	21.09	21.97	20.73	21.2	21.38	14.13	21.35	21.28	22.73	22.27	21.09	20.14	21.43	22.04	21.73	21.39	14.36	20.24	21.9	22.75
0.320254	-1.64271	0.00276037	0.135765	2.44812	1176.26	424.3	19.23	13.82	19.57	18.69	14.02	14.12	17.15	13.99	18.77	18.56	14.6	15.44	14.57	18.53	14.43	15.18	19.22	18.66	19.11	19.12	18.46	18.33	17.77	18.48	18.76	18.19	18.54	18.54	17.23	17.38	18.46	18.26	16.89	16.41	18.22	18.99	16.33	18.25	18.78	18.57	14.1	18.06	19.08
3.28436	1.71561	0.00196625	0.116734	2.44704	859.491	463.3	14.08	13.3	13.93	17.49	17.37	18.65	18.31	17.03	17.27	17.87	17.34	18.86	17.42	17.22	18.92	17.77	14.28	13.72	13.74	14.54	13.96	14.56	17.21	17.47	13.95	13.89	17.31	16.84	18.52	13.03	13.95	14.58	13.57	16.44	17.93	16.9	14.56	16.75	14.6	14.22	13.54	16.75	14.66
0.507154	-0.979505	0.00192264	0.116734	2.44473	964.787	42	19.14	17.89	16.86	16.85	16.9	16.81	19.37	16.78	19.18	17.82	18.11	16.91	16.99	19.42	19.1	20.56	19.01	19.13	16.84	17.02	19.57	18.87	17.86	18.44	19.24	18.97	19.97	19.28	17.09	19.03	18.64	19.54	19.49	19.01	19.68	19.58	19.52	18.64	19.44	19.66	18.17	18.99	18.48
0.298456	-1.74441	0.00447117	0.177047	2.39559	1469.58	300.2	13.48	14.79	17.39	16.56	16.7	12.88	13	16.01	12.85	12.38	16.48	13.24	18.25	13.3	17.29	18.36	17.88	17.42	13.02	14.01	18.43	19.9	15.77	16.19	13.38	17.69	16.81	17.54	17.31	15.92	16.05	16.62	17.3	17.17	17.84	17.01	17.21	17.22	14.81	16.85	12.76	17.49	17.97
0.503756	-0.989204	0.0419292	0.503315	2.39193	453.278	378.1	14.06	16.37	16.4	15.46	14.79	17.21	16.93	17.92	16.51	14.43	16.42	14.92	17.15	15.74	13.96	17.2	16.52	17.73	15.74	16.84	16.52	16.14	17.97	17.44	16.66	18.05	15.87	15.92	17.42	17.43	18.15	17.68	16.82	17.28	14.06	16.57	17.12	17.63	16.67	16.22	16.25	17.42	17.81
0.570297	-0.810215	0.00583515	0.203412	2.38541	788.826	42.7	17.94	17.59	17.81	17.15	17.34	17.25	18.35	17.8	17.18	18.08	16.34	15.29	15.44	17.7	16.94	18.94	19.34	18.6	17.79	16.99	18.84	18.17	18.12	17.14	17.28	17.99	17.97	17.39	15.41	17.96	17.41	18.9	17.8	19.02	18.31	18.62	17.35	18.34	17.93	18.82	17.59	18.71	17.2
0.314933	-1.66688	0.0107506	0.303677	2.3822	384.313	349.8	16.08	16	13.19	17.48	12.61	18.12	16.68	12.59	16.9	12.32	13.65	16.09	16.61	14.16	13.37	18.19	17.2	15.94	12.98	17.23	17.81	16.95	17.02	17.76	16.69	17.26	18.02	16.83	13.18	17.72	17.75	17.01	17.45	17.35	16.23	17.98	18.14	17.91	17.45	15.44	12.69	16.88	18.09
0.39067	-1.35598	0.0114267	0.307961	2.37393	1045.71	431.6	20.51	20.94	16.32	21.86	20.42	21.25	20.44	21.57	22.67	20.93	19.84	16.37	22.2	21.29	17.51	21.44	21.95	23.18	21.13	22.77	18.92	21.12	21.92	20.43	21.96	22.1	21.26	21.41	20.74	22.11	22.03	22.67	21.75	21.34	18.85	21.26	22.37	21.88	20.96	21.61	20.78	22.63	22.57
0.268327	-1.89794	0.00194981	0.116734	2.37036	510.86	41.3	15.15	16.01	13.22	12.75	12.69	12.93	18.22	18.42	12.87	12.43	16.06	13.26	14.5	13.32	16.78	16.1	17.23	17.23	13.05	18.15	17.98	17.23	12.31	16.81	15.22	15.69	12.98	12.09	13.25	17.5	18.09	18.84	17.38	17.94	16.56	16.03	17.07	15.56	16.83	17.02	15.91	18.08	17.92
0.362638	-1.4634	0.00369255	0.163415	2.36384	199.123	358	15.07	15.8	12.31	11.93	14.21	12.09	15.49	11.88	11.86	15.11	12.9	12.37	15.13	16.07	12.6	16.2	12.96	16.83	12.21	16.36	15.55	15.95	16.26	14.93	14.95	16.05	15.23	14.46	12.46	16.87	15.22	14.79	17.31	12.05	15.19	15.88	13.05	15.54	16	14.94	14.72	17.09	16.03
0.54964	-0.863441	0.0320085	0.458999	2.34882	414.357	381.7	14.89	16.63	17.11	17.27	18.14	18.11	17.85	18.53	18.35	17.35	17.33	18.24	18.04	17.55	13.86	17.84	17.72	18.6	18.19	17.59	17.4	17.2	18.15	18.39	17.45	18.53	18	17.32	18.13	17.61	18.35	18.75	18.56	18.15	17.26	17.59	18.35	18.46	17.39	18.38	17.95	18.41	19.68
0.250586	-1.99662	0.0015595	0.103368	2.33769	1110.79	41.6	18	18.13	14.45	14.12	14.1	14.23	18.71	14.09	18.42	13.74	14.67	14.48	14.64	19.93	19.11	20.73	14.78	16.41	14.32	14.94	20.17	18.95	18.27	14.54	18.41	19.66	16.96	20.05	14.58	18.34	18.68	20.2	19.73	18.51	19.51	19.81	18.38	18.71	19.4	19.45	19.23	18.07	15.97
0.507237	-0.979269	0.00217402	0.12052	2.33346	848.799	41.7	20.34	19.82	17.45	17.48	17.52	17.43	20	17.46	19.89	17.39	17.49	17.57	18.43	20.35	19.82	20	17.53	19.24	17.46	19.18	20.37	20.25	19.66	20.19	20.04	19.93	19.85	19.6	17.72	19.89	19.86	19.62	19.22	19.19	21.28	19.75	19.54	19.41	20.26	19.82	19.71	19.6	19.9
2.35281	1.23439	0.000363859	0.0572334	2.32316	500.304	286.3	13.52	16.84	13.27	17.19	16.77	17.62	15.53	16.3	17.07	15.27	17.52	13.29	16.57	15.5	16.93	14.3	13.7	13.09	15.22	14.07	16.95	14.16	16.3	16.52	15.77	13.38	13.02	16.07	13.28	15.82	13.41	14.24	15.75	12.72	14.56	14.4	15.36	15.6	16.53	13.79	15.47	15.66	14.13
0.416661	-1.26305	0.0518763	0.539833	2.31571	594.248	382.6	16.03	17.09	18.25	16.6	13.92	17.15	13.02	17.53	17.92	12.42	16.96	15.52	17.79	17.34	13.44	17.03	17.94	18.39	17.33	17.98	17.26	17.01	17.92	17.78	17.38	18.15	17.15	16.85	15.71	17.62	18.17	14.21	17.44	16.4	16.34	16.92	17.74	17.95	17.48	17.07	15.52	18.01	18.27
0.108448	-3.20492	0.00131714	0.0956178	2.31536	424.777	386.5	14.46	9.18	15.35	9.47	9.21	9.71	16.71	9.76	9.42	16.61	10.3	17.83	10.05	17.4	17.7	19	18.59	17.73	17.34	14.25	17.07	19.47	17.12	10.32	11.13	18.02	18.44	18.34	17.75	9.21	17.98	11.11	17.42	18.18	17.59	15.64	13.46	8.92	19.52	19.26	16.5	17.53	17.87
2.21954	1.15026	0.0135481	0.335874	2.31182	148.039	181.6	17.75	13.99	14.54	16.95	17.33	17.39	17.09	16.93	17.33	16.73	17.71	16.96	17	14.46	17.41	15.31	14.85	14.38	17.5	15	16.6	15.01	16.57	14.64	17.27	14.36	16.63	16.57	17.65	13.79	15.96	16.34	15.42	16.8	14.78	15.23	14.15	13.9	17.14	14.78	14.36	13.9	15.17
0.205481	-2.28292	0.00770978	0.252765	2.30719	1509.5	417.5	19	13.1	13.72	13.15	13.17	20.16	19.57	13.21	17.03	19.36	14.11	13.66	19.01	20.18	13.81	19.69	14.03	13.49	19.57	19.42	20.06	16.7	20.16	18.45	17.53	18.85	18.69	20.49	13.68	19.2	19.58	19.71	19.34	19.42	19.15	15.34	19.29	18.74	19.39	18.29	20.13	19.66	19.69
0.0490277	-4.35026	0.00276072	0.135765	2.30417	906.431	424.4	20.25	19.24	8.63	7.93	7.93	8.31	17.76	8.52	7.93	7.52	9.01	8.92	9.01	19.33	19.29	18.9	8.73	8.05	8.73	19.36	17.87	18.45	19.69	18.27	17.23	17.95	17.33	18.49	8.73	8.92	19.21	18.33	20.07	17.02	8.42	18.8	20.3	19.91	18.65	18.54	18.14	18.37	17.79
2.34941	1.2323	0.0133554	0.335874	2.29887	817.887	286.4	14.36	14.83	18.73	15.55	17.09	16.46	17.76	16.89	16.4	15.69	18.1	17.08	16.69	17.41	16.13	15.07	16	14.06	14.09	14.76	14.25	14.81	13.53	14.35	14.26	14.11	14.02	16.64	16.83	16.67	14.22	17.87	13.92	18.22	14.46	16.47	15.62	16.58	14.81	16.14	13.93	17.41	14.92
1.93871	0.955097	0.0058315	0.203412	2.28984	227.042	48.4	16.82	18.57	17.61	18.03	17.35	18.65	17.7	18.33	16.79	17.81	18.04	17.92	18.83	16.99	17.23	15.52	16.71	17.14	16.95	17.81	17.93	17.05	16.2	17.59	17.8	17.52	16.62	16.91	16.86	17.17	15.8	14.51	17.71	17.02	13.99	17.78	18.09	17.76	17.42	16.42	17.45	17.08	14.59
0.317801	-1.65381	0.00527368	0.198512	2.28264	952.824	41.6	18.92	17.71	14.41	14.05	14.06	14.18	18.3	15.94	14.13	13.69	14.64	14.43	14.62	17.76	18.09	19.07	14.74	14.22	14.26	14.9	18.19	18.52	18.07	19.5	18.78	18.11	15.3	17.11	14.52	17.13	17.74	18.08	18.5	15.72	18.9	18.61	18.77	18.02	19.29	19.28	15.37	17.17	17.65
0.258627	-1.95105	0.000649197	0.0733112	2.28028	688.524	519.4	18.71	18.88	13.53	13.05	13.01	13.23	18.07	13.05	13.22	12.77	14.01	13.52	13.78	18.68	18.65	15.34	13.92	16.61	13.36	18.31	18.87	17.81	16.84	13.77	17.97	17.85	13.3	18.5	13.56	17.7	18.14	17.96	17.67	17.78	18.88	17.52	17.96	17.81	18.38	18.71	17.42	17.43	18.76
0.346184	-1.53039	0.0245117	0.447521	2.27649	181.086	327.2	18.02	18.34	17.48	17.72	17.05	19.6	13.36	19.27	18.02	14.77	16.7	19.15	20.14	18.28	15.02	18.81	20.24	16.64	21.18	18.11	20.56	18.93	18.77	20.09	19.97	18.13	19.63	19.46	16.9	17.69	18.24	17.73	16.65	19.07	22.07	18.16	21	20.77	21.07	18.32	18.89	16.95	21.75
0.512191	-0.965247	0.00336504	0.159714	2.27475	631.16	53.6	16.99	16.53	14.05	13.55	16.15	13.7	16.19	15.63	13.69	13.26	16.98	15.65	16.84	16.28	16.07	16.82	16.15	17.26	16.62	17.21	16.19	17.37	16.32	15.98	15.97	16.36	16.65	15.75	17.78	16.26	16.77	14.68	16.7	16.72	15.57	14.94	16.33	17.16	16.08	17.8	17.66	16.09	15.63
0.175912	-2.50708	0.00569586	0.203412	2.273	812.492	431.3	14.95	10.86	11.01	10.88	18.15	10.9	18.04	14.28	17.99	10.35	11.92	11.41	17.89	17.26	11.57	12.23	11.63	18.68	18.83	17.94	11.62	12.27	11.53	17.34	17.32	16.02	17.86	16.51	18.25	17.42	17.78	17.93	18.62	15.26	11.45	16.65	17.08	18.19	14.67	17.33	17.97	18.24	18.18
0.373874	-1.41938	0.00557321	0.203412	2.26478	226.158	551.1	12.37	15.75	17.29	16.58	11.31	12.66	17.07	11.55	16.84	16.27	16.05	17.09	12.28	17.45	17.13	17.62	17.41	14.91	17	12.95	17.16	16.47	16.48	16.86	16.61	16.87	17.01	17.14	17.31	15.81	17.35	15.4	16.15	16.68	17.03	15.65	16.42	17.34	16.86	16.4	17.25	17.02	17.31
6.20107	2.63252	0.00369815	0.163415	2.25846	752.556	437.9	13.96	20.17	18.44	20.45	20.23	19.88	13.48	20.22	19.42	20.98	16.86	21.24	19.82	13.76	20.66	18.37	14.12	16.62	19.93	14.41	13.82	14.48	20.7	17.63	13.78	13.78	14.56	20.16	20.98	12.91	13.83	14.5	21.09	13.1	13.97	14.76	19.68	12.99	14.52	14.13	21.16	20.03	14.55
0.543878	-0.878645	0.000525293	0.0681093	2.23094	826.91	42.7	20.46	19.34	17.37	19.69	19.09	17.34	18.98	17.35	17.28	17.28	17.4	18.53	18.37	18.95	17.55	21.07	17.43	19.98	19.15	19.07	19.96	19.62	19.59	17.45	18.72	20.11	19.11	19.11	19.96	17.12	19.49	18.34	18.71	19.81	19.6	19.53	17.16	19.56	19.83	19.68	19.24	20.2	18.47
0.164742	-2.60172	0.00340486	0.159714	2.22926	340.284	489.1	14.64	7.93	15.3	15.99	17.05	8.05	8.17	12.1	8.92	13.28	15.49	15.66	17.01	8.05	15.21	16.33	19.08	16.12	17.32	15.43	18.87	15.42	13.72	14.46	12.4	15.61	12.83	17.02	14.95	15.39	17.52	19.54	12.09	13.76	15.36	15.96	18.24	11.83	16.21	9.42	15.13	11.45	18.87
0.565354	-0.822774	0.0020544	0.116734	2.22305	359.318	594	19.44	16.88	17.1	17.12	17.15	17.07	19.31	17.07	18.96	16.99	17.14	17.18	17.2	19.08	19.37	19.02	17.21	16.94	19.42	19	17.27	18.43	19.33	17.18	19.86	18.44	18.85	19.42	17.37	18.07	19.13	18.09	18.9	19.06	18.34	18.8	18.16	19.19	18.93	19.73	18.96	19.16	19.45
2.19709	1.13559	0.0180828	0.391025	2.22	855.165	519.3	15.6	16.59	17.65	17.49	15.04	17.26	15.11	14.62	16.02	15.81	16.46	16.91	18.1	15.43	16.76	12.45	15.02	15.28	11.1	15.93	15.58	15.67	15.19	15.11	15.51	15.36	16.49	16.53	15.1	16.09	15.53	16.4	14.54	14.37	16.24	16.09	16.81	14.86	15.33	15.74	14.11	11.34	15.76
0.336046	-1.57327	0.0812679	0.59444	2.21861	883.519	374.2	14.33	16.11	13.18	15.71	12.57	17.2	12.98	17.78	17.62	12.3	13.63	17.52	13.38	16.86	13.36	18.24	15.8	17.51	18.16	18.09	16.28	14.06	18.02	17.37	16.36	16.53	17.33	15.84	13.17	18.36	17.57	16.93	12.75	14.83	13.4	14.3	17.09	17.05	17.53	16.62	18.25	16.77	18.02
0.167086	-2.58133	0.00140864	0.0998827	2.21719	726.26	596.4	16.57	10.38	10.69	10.54	10.09	10.51	18.14	10.35	10.41	18.32	11.52	10.99	11.12	16.82	18.23	16.4	11.12	10.63	17.02	15.99	14.02	11.81	17.57	11.31	18.97	16.38	16.33	17.09	10.86	15.47	17.32	16.47	16.01	17.86	17.34	17.67	16.93	16.65	17.88	17.24	11.53	16.52	17.63
0.382094	-1.388	0.00735736	0.243833	2.21429	1081.66	428.8	17.46	17.04	14.46	18.25	15.39	14.23	16.18	14.09	18.65	17.36	14.68	17.81	14.65	18.11	14.52	18.41	14.79	19.73	18	20.54	17.92	16.96	18.31	18.55	18.21	16.99	16.94	17.52	14.58	18.82	18.38	17.76	18.05	16.82	14.67	15.19	17.05	17.25	18.25	17.95	18.07	19.1	18.74
0.41166	-1.28047	0.00406336	0.167697	2.20693	437.238	530.1	15.77	11.97	16.06	16.08	11.71	14.75	14.79	11.92	14.28	11.49	12.96	12.44	12.74	15.22	12.65	16.34	16.12	15.46	16.4	15.81	15.67	16.16	13.93	12.81	15.99	14.75	12.3	14.57	16.1	14.95	15.15	13.67	14.56	16.35	15.88	16.36	15.54	14.45	13.51	14.5	14.82	12.39	15.35
3.40576	1.76798	0.0400755	0.494697	2.20399	428.277	376.4	16.02	16.65	18.92	16.83	19.87	19.11	14.57	19.49	13.26	19.95	19.26	18.83	17.42	14.53	19.1	15.81	17.23	13.42	13.39	16.27	13.71	17.78	15.86	13.79	13.65	17.22	15.48	15.85	19.3	18.06	13.64	16.96	15.67	19.91	17.98	18.53	16.3	12.78	14.42	14	17.24	15.9	14.41
3.14832	1.65458	0.0187312	0.393871	2.20151	929.828	41.1	16.67	18.05	16.19	15.61	16.72	17.63	15.99	17.77	17.46	14.32	18.28	19.15	13.45	18.3	15.24	14.27	16.78	18.87	14.66	14.02	16.89	14.11	12.28	13.51	17.11	13.36	12.96	12.02	16.48	15.05	13.36	14.2	13.97	17.59	13.45	18.3	12.9	12.44	17.7	13.76	18.08	15.95	14.08
3.2478	1.69946	0.0269191	0.448193	2.18801	96.0804	94.5	16.06	16.47	16.14	17.59	17.34	16.78	15.76	16.46	16.44	15.95	15.93	16.13	16.78	12.17	16.75	13.22	16.75	11.88	16.32	15.77	16.6	13.06	12.59	12.42	17.09	16.14	11.88	10.63	16.99	11.49	15.83	16.83	16.07	15.89	13.27	13.32	16.72	15.96	16.67	12.71	17.44	11.04	12.94
0.417949	-1.2586	0.0793817	0.591445	2.16772	1111.68	394.4	17.78	18.84	19.43	19.39	15.35	20.54	18.59	20.39	20.1	13.65	14.61	17.43	19.42	19.68	18.6	19.97	21	20.74	19.9	20.76	18.5	18.71	19.39	18.88	19	18.9	19.32	18.93	17.79	19.97	21.08	20.18	19.62	19.11	18.66	18.24	20.89	21.09	18.63	18.88	17.92	19.62	20.87
0.34743	-1.5252	0.00300319	0.145345	2.16232	161.107	564.2	18.47	17	13.74	17.07	13.19	13.4	13.4	13.25	17.5	12.88	14.13	13.69	17.04	18.23	18.14	17.59	14.04	16.61	16.81	17	18.27	18.7	17.32	14.82	18.14	17.09	16.59	17.71	13.7	17.77	17.91	17.81	17.97	16.66	13.92	18.29	17.13	17	14.47	17.71	17.53	18.03	17.92
2.37363	1.2471	0.0286825	0.448193	2.14188	389.268	362.1	19.32	16.28	16.92	17.23	17.83	17.79	16.89	16.43	15.19	19.51	17.12	17.47	17.01	16.81	19.8	15.49	16.01	16.06	17.17	14.73	16.42	16.14	12.52	17.89	16.86	14.8	15.96	15.44	19.22	18.26	17.26	17.19	11.99	16.22	14.02	15.47	16.93	16.01	18.26	16.36	17.34	16.09	17.51
3.07783	1.62191	0.0352153	0.470928	2.13758	824.18	294.6	14.66	19.14	17.48	15.82	18.23	18.01	19.32	17.75	17.48	17.72	20.17	18.48	18.28	18.99	17.11	14.47	17.64	13.3	13.27	18.52	18.57	18.77	12.5	13.72	16.52	17.11	16.13	15.72	18.23	17.75	17.15	18.19	13.1	19.53	17.9	14.55	17.43	18.34	14.35	16.52	18.07	15.13	14.34
2.53907	1.3443	0.00587085	0.203412	2.13521	324.238	291.6	19.08	19.63	17.22	19.42	19.25	19.5	19.67	18.03	18.81	18.76	18.65	18.71	18.93	14.98	18.71	15.78	17.66	14.97	14.99	18.84	19.73	15.4	18.61	15.15	15.03	14.89	19.59	18.92	19.04	18.39	15.01	19.55	18.59	14.65	16.37	17.18	18.58	18.68	17.64	16.68	14.99	18.37	18.25
0.488216	-1.03441	0.0061373	0.205633	2.13021	828.372	48.1	19.21	18.46	16.93	16.92	16.97	16.89	18.05	16.87	20.24	16.79	16.96	16.98	20.41	17.97	20.85	20.71	17.04	18.48	19.05	18.62	18.57	20.82	19.02	19.69	18.39	19.1	20.02	19.57	17.17	19.43	18.79	18.32	19.87	18.07	21.54	19.19	17.87	19.28	18.92	19.09	19.16	19.77	18.9
0.439736	-1.18529	0.0203718	0.411348	2.1294	598.386	448.5	17.43	14.23	17.36	14.49	17.67	14.57	17.7	18.22	17.55	14.06	14.93	14.75	14.95	18.08	16.2	18.51	15.01	18.29	17.62	17.95	17.4	17.54	17.93	17.99	17.37	17.65	17.73	14.09	16.74	14.01	18.63	18.37	18.28	16.84	16.33	17.35	18.41	18.05	17.59	17.82	15.71	17.57	15.32
0.481825	-1.05342	0.00360475	0.163415	2.12844	974.818	41.8	19.61	20.09	17.26	17.28	17.32	17.22	19.59	17.23	19.98	17.16	17.3	17.35	17.33	18.46	20.33	21.69	17.35	17.1	17.25	18.62	20.29	19.54	19.32	19.47	19.49	19.24	20.1	20.29	17.52	18.44	19.41	20.66	19.84	19.34	20.58	20.4	20.17	19.15	19.31	20.98	19.65	19.23	17.48
0.468733	-1.09316	0.0564576	0.557881	2.1245	484.331	471.5	16.72	16.09	18.12	16.94	15.95	17.99	18.04	17.64	16.92	15.09	17.9	13.22	12.4	17.58	12.43	17.36	17.58	18.25	16.17	17.97	16.93	15.99	18.1	16.38	17.09	16.69	16.33	16.92	16.65	18.15	18	18.33	17.66	16.98	16.28	16.99	17.13	17.47	17.04	18.57	16.79	17.04	18.18
0.308696	-1.69574	0.060873	0.562925	2.12412	415.361	381.7	11.86	17.18	10.43	16.37	14.17	15.88	15.95	16.16	15.61	9.53	11.12	15.25	13.25	15	10.92	16.55	14.27	16.14	15.24	15.59	17.47	11.52	15.86	18.16	15.33	15.04	15.34	14.97	14.96	15.23	17	16.73	16.26	17.8	12.12	11.77	15.5	16	12.93	16.5	15.12	15.57	17.63
0.3722	-1.42585	0.0652654	0.570785	2.12332	411.32	452.6	11.19	13.79	10.9	11.51	15.78	14.11	14.56	13.44	15.12	10.21	13.91	11.17	14.58	11.25	11.36	15.06	15.42	14.89	13.46	16.29	14.85	12.05	15.36	14.49	14.86	13.08	14.78	14.89	13.45	13.1	15.08	12.33	15.1	13.86	11.13	18.46	14.74	14.39	15.39	15.08	10.73	15.12	15.73
0.373439	-1.42105	0.0385354	0.491609	2.11919	934.694	44.5	18.02	19.08	15.06	14.97	15	18.01	17.54	14.87	19.79	14.55	15.3	15.17	15.32	18.85	19.08	19.47	15.37	20.83	18.77	18.6	17.84	20	18.56	20.42	18.26	17.67	19.74	17.88	15.28	18.94	18.69	17.52	17.42	14.71	16.42	18.41	17.39	19.35	17.58	18.3	19.02	18.45	19.29
0.367049	-1.44596	0.010828	0.303677	2.11848	684.44	447.2	16.17	16.23	11.36	12.06	14.57	15.4	15.94	15	11.05	16.63	12.23	17.66	14.3	16.03	11.9	16.71	17.27	17.14	13.93	16.72	15.86	16.82	16.85	11.99	16.04	15.53	16.15	17.32	15.77	16.4	15.9	18.51	17.81	14.25	16.46	16.14	13.84	15.57	12.59	16.22	14.33	17.12	15.82
0.386678	-1.3708	0.000496932	0.0681093	2.11801	725.381	482.7	15.3	14.05	11.33	13.57	14.06	11.17	14.36	11.1	11.01	16.74	12.21	14.96	16.3	14.57	15	15.4	12.06	15.82	11.25	15.59	14.71	16.52	15.59	14.95	15.28	16.94	13.85	14.85	11.63	15.02	16	16.11	15.74	13.65	15.72	16.26	16.51	15.13	15.74	16.4	16.45	15.85	15.92
0.227886	-2.13361	0.0833468	0.595139	2.11728	1112.68	394.5	14.45	18.41	13.24	18.67	12.7	20.14	18.49	19.11	19.56	12.44	13.73	13.27	19.13	19.48	13.45	19.76	20.32	20.09	19.15	20.9	18.48	18.85	18.93	19.09	18.82	18.34	17.49	17.2	13.27	20.32	21.12	19.91	19.07	18.6	13.46	14.37	20.05	20.76	17.75	18.74	12.78	19.18	20.41
11.4771	3.52069	0.0286197	0.448193	2.1102	411.739	459.9	13.83	16.81	17.7	15.05	14.3	18.13	7.52	7.67	17.61	15.05	17.72	18.36	14.21	17.29	8.52	8.84	18.13	7.37	16.54	9.01	8.17	15.46	7.37	8.42	14.55	18.21	8.05	17.74	15.84	16.74	8.05	9.21	8.17	7.37	7.93	9.28	17.68	6.67	8.84	17.93	7.37	6.38	8.73
2.24215	1.16488	0.0015344	0.103368	2.09855	584.891	523.6	12.54	15.34	15.96	14.57	14.18	15.17	11.99	14.95	15.98	16.07	15.33	17.21	15.64	12.4	16.79	13.42	14.67	15.97	14.72	13.14	12.41	13.18	15.67	15.86	13.99	12.49	15.19	10.8	14.86	12.74	12.56	13.44	14.81	14.86	12.39	13.52	13.08	15.74	13.27	12.94	15.6	12.21	13.12
0.28336	-1.81929	0.0866854	0.597972	2.0926	839.321	383.5	12.22	14.9	11.74	15.3	11.12	17.31	11.6	16.36	15.21	10.92	19	16.21	15.98	11.98	12.13	17.34	12.39	16.3	18.25	13.7	15.83	12.91	17.26	12.28	17.73	16.59	17.17	16.8	16.14	17.18	16.65	17.65	15.98	16.01	12.05	17.08	14.71	18.86	18.29	12.54	14.43	16.16	15.19
0.111848	-3.16039	0.0210613	0.414296	2.0887	1001.7	439.2	10.13	18.1	9.08	19.13	8.42	19.37	16.32	19.9	8.31	18.09	9.28	16.97	19.29	19.07	9.01	19.33	9.21	20.66	18.03	19.99	16.14	17.26	19.18	9.35	19.75	17.93	17.88	18.69	18.55	19.22	19.38	20.09	19.57	18.71	15.55	18.52	19.74	19.38	19.37	19.06	14.52	19.77	20.08
3.47272	1.79606	0.0556783	0.555981	2.08409	146.036	251.8	14.59	16.99	16.32	14.92	17.85	17.14	11.8	16.18	16.94	15.94	13.51	15.28	17.52	18.22	15.72	13.24	12.57	17.63	11.72	12.96	12.24	13.08	11.36	12.46	16.9	17.3	11.91	17.76	12.06	16.09	12.34	13.27	16.52	16.43	15.12	17.77	17.11	11.19	13.05	15.36	11.68	11.1	12.96
3.18053	1.66927	0.136712	0.664963	2.08144	143.07	280.7	17.34	17.25	16.62	17.17	18.69	17.32	17.55	16.83	17.21	17.31	17.21	17.32	15.41	17.5	16.63	19.73	13.14	17.53	12.43	17.53	12.84	18.63	11.81	12.96	16.4	16.56	12.42	18.26	17.45	14.17	12.8	17.95	16.92	17.88	14.1	13.86	15.67	11.68	13.61	13.99	18.08	16.8	13.46
10.1611	3.34499	0.00197294	0.116734	2.07977	396.257	273.2	16.88	14.18	6.93	16.86	16.55	17.06	16.12	16.11	16.64	13.8	17.09	6.38	8.42	6.67	16.33	7.52	7.16	6.38	14.84	7.93	7.52	7.81	14.6	12.88	8.31	7.52	14.94	14.59	7.52	17.08	7.16	8.17	17.01	8.31	7.16	7.93	16.82	15.36	8.05	8.17	6.67	16.78	7.52
0.544275	-0.877591	0.0892684	0.603355	2.07675	470.315	372.5	17.9	18.95	18.95	15.5	16.58	18.42	17.88	18.79	19.39	18.2	17.58	15.59	18.63	18.67	17.24	19.33	19.08	19.21	18.16	18.89	18.8	18.03	20.14	20.08	18.24	18.72	18.95	17.97	15.74	19.32	19.61	19.37	18.64	18.43	17.96	18.61	19.09	19.22	15.89	18.8	18.34	19.26	19.97
5.22589	2.38568	0.0293729	0.448193	2.07195	127.131	62.4	16.76	17.66	15.93	10.69	16.83	17.62	16.42	18.4	13.45	15.19	18.39	17.51	11.19	10.99	18.11	11.81	16.02	10.71	10.61	11.85	11.22	11.92	10.09	11.38	17.91	11.31	10.73	17.09	10.94	10.41	11.19	12.07	11.33	10.83	17.75	18.75	15.86	17.23	11.64	11.51	14.57	17.16	11.51
0.250075	-1.99957	0.00274888	0.135765	2.06552	728.465	445.6	15.81	9.01	9.42	13.76	14.86	16.38	16.01	15.2	9.15	17.16	10.05	16.64	15.6	16.22	9.53	16.59	10.86	16.2	16.54	15.43	16.23	17.69	13.6	9.92	16.23	15.25	16.52	17.25	15.61	15.75	15.49	16.29	15.51	17.4	16.66	16.86	15.31	14.89	10.54	16.3	16.56	17.75	16.37
0.359425	-1.47624	0.0269985	0.448193	2.06056	239.091	256	16.63	17.39	15	17.97	13.76	16.22	15.75	16.5	17.03	14.96	13.49	18.49	19.96	16.99	12.21	16.89	19.79	16.21	18.3	19.3	19.92	18.5	16.67	18.58	17.66	17.07	17.96	17.21	13.56	16.81	16.78	16.57	16.1	18.59	20.31	16.08	19.31	19.7	19.24	15.42	17.02	15.47	20.12
0.553768	-0.852645	0.0129476	0.334553	2.04725	532.458	405.6	16.76	16.03	13.6	17.11	13.05	17.28	16.18	17.13	14.43	16.11	14.05	16.15	18.08	16.69	16.42	14.58	16.04	18.22	16.8	16.81	16.81	17.53	17.39	17.4	16.17	16.47	16.32	16.67	15.95	16.4	16.09	17.45	16.3	17.57	17.43	17.47	17.42	15.86	16.28	17.38	16.74	15.8	16.81
0.265974	-1.91065	0.0356692	0.47199	2.04644	195.968	34.1	12.3	17.4	11.8	11.36	11.25	11.55	17.07	11.47	16.78	10.99	17.75	11.91	17.04	16.32	12.16	17.28	12.41	15.94	11.63	17.26	12.17	15.22	18.37	16.01	17.17	17.23	17.2	11.75	18.31	17.62	16.08	15.13	14.79	17.11	15.16	18.4	14.28	17.25	17.71	12.61	14.12	15.21	16.73
1.69213	0.758839	0.00539294	0.200525	2.04524	525.392	520.4	15.97	17.76	17.69	17.85	18.58	17.67	17.45	17.84	17.29	17.88	18.25	18.03	17.35	15.76	18.84	16.43	17.77	17.11	15.74	16.1	18.62	16.99	17.17	18	15.79	16.73	18.3	15.48	16.02	17.31	15.72	15.84	15.68	15.52	18.13	18.19	17.31	17.64	16.11	15.91	18	17.58	16.27
0.28774	-1.79716	0.116483	0.624164	2.04411	298.624	374.6	13.78	17.85	18.62	8.52	17.01	18.34	17.12	18.65	18.61	17.15	14.51	17.8	17.06	17.58	7.67	17.03	20.08	19.09	16.97	19.45	17.52	16.81	18.95	17.86	16.96	17.98	17.84	17.22	17.19	18.8	19.34	18.07	17.38	17.24	17.17	17.28	18.5	19.91	15.79	16.81	14.65	18.39	19.02
1.70644	0.770989	0.00194121	0.116734	2.04201	438.267	296	17.22	17.43	15.16	17.41	17.63	17.57	14.81	17.45	17.94	16.72	17.52	16.85	17.49	15.12	17.19	15.86	15.42	15.08	16.1	15.55	17.43	15.51	16.73	17.1	15.14	15.03	17.36	17.39	16.57	16.68	15.11	15.37	17.12	14.78	15.42	15.67	16.98	17.2	15.55	15.33	17.7	16.72	15.75
3.30834	1.72611	0.0134074	0.335874	2.03907	576.504	454.3	12.98	16.67	17.36	17.8	18.59	15.94	17.66	12.05	18.28	17.37	13.08	18.14	16.41	17.84	15.37	17.01	13.11	16.1	19.06	13.45	12.82	18.11	15.58	16.56	12.81	12.8	17.47	15.52	16.71	16.82	12.78	13.77	11.98	12.21	12.76	13.83	17.41	16.79	13.59	13.24	17.35	12.55	13.43
1.83216	0.873548	0.0214984	0.414865	2.03369	565.463	388.4	17.77	16.11	17.28	17.6	17.8	16.23	16.78	17.75	17.48	15.44	16.37	17.76	17.69	18.66	16.98	17.44	18.07	16.41	17.53	17.33	14.09	17.07	16.25	15.78	15.08	16.64	16.48	17.26	16.45	16.33	17.61	17.88	15.35	16.3	14.3	17.87	17.22	16.69	14.71	14.4	16.27	16.19	14.82
1.9775	0.983677	0.0532081	0.546234	2.02771	588.229	415.6	16.98	19.36	19.62	19.32	19.61	19.44	19.6	19.39	19.34	19.59	19.22	19.24	19.22	16.8	19.23	18.54	19.26	19.36	19.69	16.97	16.97	18.39	16.55	19.48	16.78	19.35	16.63	19.46	19.56	16.51	16.74	16.66	16.72	19.17	17.1	19.59	19.44	16.56	16.96	16.84	20.24	19.8	17.09
0.363255	-1.46095	0.00601061	0.203626	2.02523	1188.74	40.8	19.25	19.47	14.71	14.48	14.43	14.56	18.87	14.4	18.21	14.04	18.99	20.05	14.93	19.17	18.4	19.2	15	15.63	18.81	17.46	18.46	20.82	19.1	18.92	19.3	19.26	18.84	18.95	14.85	17.59	18.32	19.87	20.49	18.83	19.15	18.71	19.26	18.05	18.11	18.39	18.79	18.66	18.13
0.545299	-0.874882	0.116537	0.624164	2.02363	210.12	361.5	14.36	15.41	15.44	15.02	17.29	16.59	15.77	16.98	17.74	14.84	16.61	16.1	17.59	17.05	15.59	18.13	18.44	15.49	18.52	17.2	17.85	15.05	18.07	17.49	17.41	15.78	15.71	16.58	16.43	17.56	18.4	16.05	15.83	15.06	18.02	17.35	18.2	17.44	16.57	16.58	18.51	16.15	18.66
0.466746	-1.09929	0.0282114	0.448193	2.0194	450.298	506.8	13.72	13.65	14.45	15.46	16.03	14.22	16.38	16.48	15.5	15.69	13	12.5	16.39	16.93	12.68	16.08	16.75	15.21	12.34	17.11	15.29	16.3	17.12	15.66	13.97	14.54	15.85	16.48	12.54	17.27	16.56	17.22	14.46	16.96	17.41	16.85	15.51	16.33	15.91	17.8	16.04	16.55	16.73
0.251154	-1.99335	0.0155207	0.361242	2.01723	1490.02	417.4	18.63	18.76	13.64	20.36	13.05	13.3	18.51	13.13	20.63	18.6	18.42	13.59	20.56	19.72	13.74	20.39	13.97	21.05	19.66	19.97	18.21	18.61	20.22	20.55	20.09	18.61	19.05	19.56	13.62	20.26	20.1	20.88	19.74	14.07	17.33	19.48	19.79	20.59	19.43	19.56	18.85	20.35	20.17
0.598284	-0.741097	0.0168764	0.378008	2.01148	537.809	427.6	17.73	17.52	19.16	18.47	17.86	17.86	17.19	13.7	18.59	18.26	16.89	17.64	18.56	18.09	15.22	18.05	18.64	19.23	17.26	19.04	17.13	17.76	18.46	18.33	18.19	18.17	18.03	17.87	17.93	18.25	18.49	18.27	18.42	18.29	16.72	17.51	18.87	18.54	18.51	18.25	17.68	19.07	18.8
2.18855	1.12998	0.0275098	0.448193	2.01089	440.244	554.4	15.19	12.73	13.55	12.91	14.42	15.95	13.7	13.23	12.76	13.77	10.76	12.82	15.19	13.86	14.95	11.16	13.37	10.13	14.43	10.96	13.81	12.34	11.72	12.61	13.21	13.55	10.17	11.78	10.38	12.57	10.58	11.47	12.27	12.16	14.74	13.82	12.98	13.81	14.48	14.53	15.32	11.88	12.85
0.469188	-1.09176	0.0312644	0.454877	2.00351	612.327	435	16.49	17.56	14.3	13.91	13.95	18.24	16.31	13.89	14.03	13.57	16.96	14.32	14.51	17.24	16.55	17.08	14.65	14.11	17.98	16.85	16.22	17.36	17.85	15.82	17.5	16.59	17.66	17.27	14.42	15.99	17.06	17.16	17.99	15.88	16.53	16.89	15.25	17.39	17.17	16.62	17.41	17.71	15.86
7.43617	2.89456	0.0299672	0.453691	1.9996	596.135	580.8	16.37	12.68	16.21	6.38	5.11	15.39	13.56	6.38	14.61	14.91	14.02	14.72	15.17	15.27	15.89	13.2	6.38	14.27	6.38	14	6.93	7.16	14.36	14.68	7.81	16.06	11.25	13.94	6.93	11.57	6.93	7.52	7.16	16.35	13.6	8.84	6.67	13.91	7.52	7.67	14.09	13.39	7.16
0.428024	-1.22424	0.046743	0.520144	1.99463	874.807	41.3	17.74	17.77	17.55	13.58	13.7	17.17	17.37	17.13	13.72	13.32	18	17.49	14.3	16.91	16.48	18.44	18.01	16.33	18.32	17.13	17.38	17.62	17.99	18.36	18.78	17.93	17.65	17.89	14.15	17.46	17.88	19.13	17.35	17.86	18.52	18.77	18.6	18.9	17.31	17.19	15	15.29	14.77
0.387364	-1.36824	0.0135495	0.335874	1.99381	215.927	36.7	15.74	14.73	16.45	14.47	12.21	9.76	15.37	13.85	13.74	10.88	14.67	11.1	10.17	14.01	10.17	14.47	17.25	13.23	14.67	16.58	15.02	10.88	13.89	14.58	15.19	15.43	13.12	13.57	13.08	14.29	15.34	11.19	12.94	15.13	15.56	15.44	13.04	14.76	15.69	15.28	14.59	13.87	16.01
0.305929	-1.70873	0.0140541	0.344797	1.99339	484.365	456.7	17.48	16.89	13.39	17.21	12.83	13.05	17.48	12.86	19.02	12.56	13.86	16.09	18.9	18.23	13.54	18.94	13.78	19.76	13.15	18.98	13.5	16.71	18.43	17.52	18.1	17.09	16.66	17.03	13.39	17.55	18.21	19.09	18.88	16.64	17.15	17.4	18.52	18.2	18.12	19.3	14.18	18.43	19.69
0.590866	-0.759097	0.0206221	0.413662	1.99048	508.399	514.3	15.02	16.72	14.88	17.45	17.73	14.81	14.53	14.64	17.26	17.3	15.12	16.57	16.61	17.05	16.08	17.5	17.36	14.8	17.53	15.32	17.61	17.13	17.16	16.77	17.12	17.18	17.25	17.51	17.78	17.28	16.67	17.22	17.04	17.35	16.64	17.15	16.73	16.66	15.33	17.49	14.83	17.16	17.58
1.63712	0.711161	0.0323412	0.458999	1.97912	114.11	304	18.37	17.5	16.99	18.27	17.98	17.84	18.14	17.83	17.69	17.52	17.67	18.11	18.3	17.12	17.91	15.54	16.98	14.68	17.8	18.02	17.41	15.2	16.95	16.56	17.91	16.59	17.31	18.06	17.54	17.87	17.89	18.39	16.72	17.8	17.81	15.41	17.99	17	17.22	16.94	18.3	17.95	17.71
0.419084	-1.25469	0.00938301	0.283255	1.97559	941.605	432.5	16.98	17.1	13.76	17.97	13.22	13.43	18.66	16.5	13.41	18.06	14.14	16.71	13.94	17.26	13.83	14.68	17.8	18.39	17.42	17.73	18.1	17.32	16.71	13.9	17.86	17.29	17.15	17.34	17.41	17.99	17.83	16.37	18.08	17.92	15.97	14.72	18.21	18.96	14.49	16.33	14.61	16.69	14.51
0.590699	-0.759505	0.186039	0.705684	1.974	261.617	372	15.43	16.16	17.25	15.75	15.23	16.72	15.58	16.81	17.3	15.63	14.09	16.47	16.74	16.54	13.78	16.54	17.84	17.45	16.34	17.04	16.72	15.71	18.19	17.44	15.95	17.06	16.37	14.98	15.26	17.17	17.75	17.07	16.21	15.22	14.94	16.22	16.76	17.29	16.2	16.9	15.79	17.24	18.11
0.44794	-1.15862	0.00391181	0.166971	1.97296	823.689	588.7	15.79	15.37	11.49	14.56	10.88	11.27	15.31	11.29	15.77	15.73	15.45	12.58	12.04	15.85	16.21	16.45	13.8	15.61	11.38	16.22	15.18	15.85	14.57	15.85	15.01	15.54	15.71	15.2	11.72	15.35	15.12	15.54	14.72	15.46	15.99	16.28	15.53	15.37	15.6	15.19	15.69	15.31	15.13
12.8961	3.68886	0.0039429	0.166971	1.97192	285.13	58.8	14.36	15.77	17.24	16.08	17.04	16.52	17.59	16.84	14.76	13.91	14.11	16.1	18.04	5.11	16.7	5.85	15.53	17.33	14.89	5.11	16.91	5.11	16.84	15.77	15.52	16.64	15.59	15.71	15.35	15.17	5.11	5.11	5.11	5.11	12.97	5.11	14.74	16.49	5.11	5.11	16.84	15.04	15.03
1.72944	0.790301	0.0146096	0.348006	1.97139	199.095	271.8	18.2	14.84	17.86	17.77	18.2	18.16	17.9	18.09	17.51	17.17	17.27	17.83	18.12	17.41	17.96	15.92	18.11	17.2	17.27	16.99	15.33	15.58	17.39	18.11	15.22	17.53	18.03	17.17	17.58	16.85	17.34	17.39	15.14	16.97	17.94	15.73	14.98	17.82	17.6	18.08	15.21	15.99	15.82
0.201793	-2.30905	0.0855359	0.597324	1.97059	513.296	383.3	15.98	10.28	17.34	10.41	9.76	11.41	15.38	18.03	16.75	9.65	11.41	10.83	17.6	15.49	11.12	17.71	18.05	17.15	17.35	18.02	13.58	15.25	16.95	17.5	15.56	17.58	15.08	8.63	10.73	17.65	17.5	16.39	15.4	18.22	10.9	11.93	18.71	15.99	18.42	11.38	10.17	16.83	17.33
2.09774	1.06884	0.0645229	0.568585	1.96588	961.377	297.5	15.48	18.02	18.5	18.09	18.09	18.14	18.26	18.02	14.09	17.27	19.39	17.99	18.23	18.83	17.76	17.87	18.23	14.18	14.22	17.75	14.39	17.89	15.11	17.15	16.06	16.91	17.96	16.39	15.91	17.39	16.06	16.14	14.1	18.75	18.87	15.13	17.22	16.61	17.91	16.14	18.24	17.7	15.03
1.78214	0.833613	0.0547354	0.55007	1.96534	774.597	444.5	18.78	18.46	18.32	19.08	18.24	19.08	18.57	18.28	17.86	19.87	18.23	19.52	16.63	16.46	18.05	17.01	19.34	16.34	19.45	18.56	16.67	19.04	17.47	16.6	16.46	16.34	16.29	19.64	18.66	17.58	16.42	16.41	18.06	18.09	16.79	16.82	17.28	16.19	16.7	16.55	17.69	18.34	19.09
2.77179	1.47082	0.0334994	0.46853	1.95808	1309.96	432.6	16.83	17.87	17.33	16.35	17.57	18.27	16.62	13.02	16.67	16.06	13.95	17.96	17.66	17.63	13.64	14.49	15.77	13.32	16.72	17.47	13.64	14.33	17.44	13.75	17.01	13.61	13.25	13.83	13.52	12.69	13.59	14.37	18.41	12.88	13.76	14.56	17.4	12.73	16.05	13.95	13	12.49	17.73
4.43834	2.15002	0.0573128	0.558296	1.9579	821.443	477.6	9.86	10.61	17.1	15.49	14.95	17.24	16.08	17.16	12.65	17.7	14.45	14.11	16.27	15.48	9.71	10.61	9.71	9.21	13.82	10.43	10.05	10.63	11.55	10.09	14.74	15.4	17.35	16.01	14.84	13.89	9.97	16.61	13.13	17.03	9.65	10.83	9.59	8.52	10.58	14.65	15.83	9.65	10.54
0.499434	-1.00163	0.0148855	0.351829	1.95536	612.828	47.4	17.19	16.66	14.73	14.52	14.49	14.59	17.84	17.14	14.54	14.1	18.8	14.79	17.61	17.57	17.52	17.98	15.04	17.81	14.63	17.89	17.06	17.7	18.01	17.57	17.36	17.74	17.93	17.46	14.89	15.33	17.7	17.37	17.64	18.45	17.62	15.36	16.71	17.71	18	17.37	18.34	17.74	17.34
0.545502	-0.874344	0.0344174	0.470928	1.95513	1046.72	430.6	19.47	18.93	16.41	19.75	17.77	19.56	18.35	19.54	20.44	18.66	18.29	16.45	19.91	19.15	16.55	19.79	20.33	21.16	18.89	21.03	18.43	18.93	19.4	19.07	19.72	19.1	17.72	19.28	18.27	19.68	19.99	20.44	19.32	19.37	17.65	19.74	20.3	19.62	19.88	20	18.7	20.54	20.9
2.09749	1.06867	0.0389937	0.493328	1.94825	580.168	447.2	15.56	14.94	16.39	15.77	14.97	15.4	16.38	15.39	13.81	14.44	13.59	15.09	14.76	16.5	16.04	15.4	11.19	14.23	14.79	14.79	16.89	14.89	13.41	11.4	11.12	14.05	14.47	15.26	14.94	15.26	14.44	15.09	14.85	14.6	15.78	12.17	14.78	15.33	11.66	12.67	14.79	15.79	16.72
1.78858	0.838817	0.0559574	0.555981	1.94101	689.019	519.3	18.21	18.51	18.57	18.14	18.26	18.22	17.51	18.11	18.32	18.71	17.94	19.57	18.31	18.15	18.47	13.36	16.28	17.89	18.13	17.89	18.26	17.69	17.04	18.08	17.27	17.81	12.86	18.13	18.25	17.98	17.57	17.92	17.36	17.22	18.9	18.18	17.99	17.62	18.09	18.11	17.87	17.39	18.87
0.579656	-0.786731	0.090184	0.603355	1.93479	201.163	508.1	12.95	13.92	15.54	11.08	12.06	14.33	13.91	14.22	13.84	12.97	12.79	14.38	14.43	14.25	13.8	15.02	15.47	11.52	14.94	14.92	14.26	13.75	14.63	14.44	14.26	14.56	13.46	14.89	12.65	14.28	15.38	15.95	15.89	12.92	14.59	15.16	14.82	14.83	14.73	14.57	13.4	13.51	16.14
0.627879	-0.671441	0.00816706	0.26212	1.93089	739.066	49.3	18.8	18.81	16.6	16.55	16.6	16.53	18.92	16.49	16.53	16.39	18.65	16.65	19.31	18.55	18.1	18.08	16.71	16.43	19.02	18.55	18.48	18.06	18.58	18.35	18.18	18.16	18.98	18.82	16.84	18.13	18.89	18.75	18.96	18.74	18.74	17.96	18.68	18.68	18.11	18.23	18.89	17.72	17.76
0.523608	-0.933441	0.0182814	0.391171	1.92728	1098.76	41.2	18.16	19.35	15.77	15.68	15.69	15.7	18.72	19.02	18.36	15.37	18.82	15.79	16.93	17.24	19.4	17.8	15.97	17.91	15.65	17.94	17.82	20.72	18.51	19.22	18.39	18.81	18.4	18.6	15.93	18.86	18.92	18.66	18.19	18.54	18.64	18.35	19.2	18.64	19.01	18.92	17.79	18.49	17
3.19112	1.67406	0.0933921	0.61062	1.92677	448.23	344.9	16.66	15.24	10.25	15.37	15.1	16.63	15.62	14.81	15.11	14.5	16.05	15.43	15.43	15.51	16.68	11.31	10.76	15.12	16.19	12.44	15.71	15.62	9.71	10.9	10.61	15.6	14.85	13.21	16.19	15.34	16.16	11.66	15.38	14.9	15.22	11.6	10.21	9.65	18.09	11.04	15.41	15.28	11.13
0.19001	-2.39585	0.0410316	0.498428	1.92459	1027.76	41.9	17.41	16.53	10.54	10.47	10	18.73	17.95	18.09	17.17	9.71	11.47	10.88	10.99	10.88	18.86	19.22	11.01	11.58	18.3	16.8	18.22	17.2	16.35	11.27	18.14	19.99	16.67	18.42	10.76	17.15	18.08	16.58	17.39	16.76	17.47	17.66	18.19	18.88	17.07	17.01	10.32	18.72	17.05
0.532288	-0.90972	0.110309	0.612862	1.92429	613.454	415.4	19.35	18.16	19.61	19.31	14.77	19.26	18.19	18.36	19.07	14.35	18.32	16.48	18.81	19.59	15	18.75	18.89	19.45	18.87	18.9	18.21	17.83	19.1	18.65	18.12	18.64	18.29	18.77	18.84	19.29	19.23	20.44	19.14	18.49	16.25	19.78	19.21	19.57	19.09	19.35	18	18.8	18.85
0.568726	-0.814194	0.0548017	0.55007	1.92417	455.39	397.3	15.12	16.21	16.45	17.44	17.16	17.78	14.63	17.48	17.29	17.24	16.63	16.75	16.55	14.94	15.08	18.01	17.13	17.97	16.98	15.4	15.07	16.55	17.02	16.95	17.97	17.46	17.06	15.67	17.98	17.15	18.31	18.83	17.59	17.44	15.25	18.3	18.04	18.17	15.41	17.68	16.8	18.46	15.6
0.614637	-0.702194	0.134867	0.660048	1.92349	560.334	342	15.78	16.74	15.71	17.26	17.02	16.83	17.09	17.53	17.06	15.3	18.07	15.73	17.78	15.65	15.78	17.68	17.96	18.08	16.94	17.79	15.79	15.93	17.94	17.24	16.67	17.82	16.93	16.62	16.94	16.88	18.79	18.22	16.61	15.35	15.96	16.08	17.75	18.16	17.48	18.84	16.74	17.3	19.17
1.63456	0.708903	0.0105672	0.303677	1.92233	153.04	42.7	17.63	18.19	18.58	18.18	17.87	18.47	18.61	18.23	16.01	18.16	18.33	17.9	18.65	17.38	17.15	17.33	17.99	16.57	17.69	17.12	18.46	17.21	17.7	17.37	17.24	18.56	18.35	15.31	18.5	18.27	18.47	16.12	15.86	15.79	16.35	16.53	16.6	15.54	18.56	16.31	18.57	17.55	18.51
0.389164	-1.36155	0.016985	0.378008	1.91903	905.787	41.7	18.04	17.98	18.99	14.06	17.32	15.74	18.03	12.88	16.48	12.58	18.24	17.72	13.62	18.01	19.19	18.64	18.66	13.2	13.17	19.38	19.78	16.78	17.18	17.86	18.91	18.05	19.13	17.45	19.36	19.22	19.6	18.5	17.87	17.61	19.72	17.15	18.17	17.85	18.04	16.78	18.38	19.13	17.22
1.80218	0.849742	0.0313297	0.454877	1.91791	115.05	51.3	18.58	18.09	18.14	17.63	18.35	18.15	18.24	18.19	18.18	17.85	18.07	18.58	18.06	17.18	18.39	18.12	17.86	15.24	18.41	15.68	18.66	17.87	14.9	18.21	18.22	15.18	18.25	18.19	18.39	14.85	18.28	15.48	18.01	14.96	18.42	16.68	18.05	17.65	18.33	15.49	18.23	18.01	15.88
0.129186	-2.95247	0.00911373	0.281891	1.91669	603.087	50.5	16.55	17.58	17.82	17.94	16.39	7.16	17.32	15.69	6.93	6.67	7.37	6.67	7.16	16.49	16.56	18.48	17.88	16.58	17.46	18.92	17.02	16.28	16.35	7.81	14.71	16.37	18.19	16.44	16.12	13.91	16.56	15.82	17.13	17.32	16.73	18.19	18.07	17.29	16.64	17.01	15.34	5.11	7.81
2.16416	1.11381	0.0512129	0.539833	1.91197	338.603	436.1	16.68	17.14	17.61	15.94	17.52	17.79	16.8	12.3	16.92	18.03	18.13	17.51	13.8	18.17	17.48	13.14	14.23	11.71	15.53	16.1	15.01	15.88	16.08	15.71	14.95	15.51	16.11	16.2	16.12	16.21	17.44	13.15	15.84	15.35	17.01	15.77	16.79	16.96	16.27	15.45	13.52	15.23	17.74
0.508425	-0.975892	0.00586814	0.203412	1.90431	944.713	43.1	19.05	18.39	16.76	18.1	16.88	17.81	19.68	17.4	17.87	17.83	14.84	18.09	14.84	20.09	18.13	19.2	15.85	19.57	17.86	19.65	19.81	20.56	18.79	18.23	19.96	19.65	17.77	18.57	19.02	17.73	18.55	19.71	18.57	18.64	19.41	19.34	14.24	17.78	19.06	19.09	18.82	18.93	19.09
0.336929	-1.56948	0.0975149	0.61062	1.90309	629.859	41.4	17.28	16.38	16.97	11.16	17.19	19.71	16.1	16.97	17.22	16.75	17.03	16.75	10.96	10.83	15.79	18.82	17.1	16.78	17.77	17.25	18.52	16.57	13.79	17.18	16.77	17.95	19.47	15.89	17.01	19.25	17.99	17.83	18.38	18.71	17.35	17.79	15.96	20.16	18.58	18.21	18.92	14.11	18.72
0.557496	-0.842968	0.130372	0.657121	1.90264	1037.66	396.9	16.45	17.86	19.36	18.5	17.71	19.32	18.63	19.28	19.55	18.09	16.79	15.35	18.86	19.14	15.38	18.97	19.63	20.06	18.53	20.24	18.85	18.57	19.61	17.12	19.05	18.33	18.84	16.72	17.18	19.26	20.05	19.59	19.4	17.96	17.39	19.07	19.61	19.52	17.73	18.9	17.44	19.39	20
0.466023	-1.10153	0.0628646	0.567262	1.90072	971.606	400.9	15.85	18.73	19.93	15.68	18.75	15.7	15.44	19.58	19.61	18.98	19.88	18.36	19.77	15.68	15.85	18.99	19.46	20.35	18.85	19.98	15.85	16.91	19.78	18.29	19.01	18.93	18.53	17.57	15.93	19.83	19.75	19.82	19.43	19.72	16.05	18.6	19.81	19.65	19.22	19.51	19.29	19.42	19.74
0.479918	-1.05914	0.0290738	0.448193	1.89356	839.964	434.6	13.75	16.27	18.01	15.7	16.21	13.2	17.59	17.12	17.21	17.68	13.99	16.39	17.08	17.74	13.66	15.33	17.47	17.5	16.62	17.78	13.67	14.35	18.87	15.96	18.15	17.18	15.38	16.49	19.02	16.39	17.99	18.21	17.69	18.19	16.04	18.11	16.99	17.98	18.65	17.58	16.26	17.16	18.6
3.06647	1.61658	0.0548447	0.55007	1.89007	795.32	346.7	16.81	15.37	16.79	11.43	17.66	15.44	16.17	13.68	17.07	11.04	18.51	16.88	15.78	16.17	17.06	13.18	12.49	15.91	14.78	16.46	13.39	15.78	11.31	12.36	12.28	14.13	16.01	10.61	12.02	17.12	16.95	13.19	12.49	11.71	14.94	13.28	11.63	11.1	18.79	12.65	15.81	14.88	16.9
0.452645	-1.14355	0.0285027	0.448193	1.88396	520.303	396.7	19.08	18.14	18.59	15.29	15.29	15.3	18.2	15.13	19.38	14.91	17.59	15.41	19.08	18.16	15.45	18.75	18.85	20.08	15.3	20.17	18.14	18.42	18.72	17.43	18.7	18.43	16.7	14.91	15.54	18.5	19.56	18.9	18.65	16.06	18.89	18.5	17.99	18.48	18.86	18.05	18.62	14.96	18
0.561541	-0.832538	0.00596307	0.203626	1.88185	805.609	515.8	15.35	12.17	14.78	16.53	13.91	15.56	15.65	14.67	15.23	14.77	16.2	12.6	15.85	15.66	14.74	16.55	13.19	16.93	17.26	15.76	15.88	15.94	15.28	13.02	16.19	15.24	13.41	16.35	16.71	14.83	16.01	15.91	16.77	16.63	16.39	16.38	14.96	14.49	15.98	14.94	16.23	15.44	16.66
0.538738	-0.892344	0.0133713	0.335874	1.87607	804.513	594.3	15.44	12.52	12.01	14.78	14.71	13.56	15.56	13.39	11.64	12.81	12.65	12.07	14.35	15.82	12.35	14.38	15.8	14.51	13.87	13.05	13.59	15.22	14.07	12.51	14.66	14.97	14.3	14.71	14.37	12.94	14.1	16.39	14.47	14.18	12.31	13.44	14.75	15.18	13.14	15.65	16.97	14.94	15.85
3.29162	1.7188	0.0568238	0.557881	1.87555	899.638	347.4	20.71	18.19	16.07	21.69	19.77	21.8	18.44	20.62	19.43	18.13	22.58	22.84	18.45	17.9	24.47	21.27	16.23	20.18	21.72	16.3	19.56	22.03	15.7	16.13	16.02	21.59	19.54	20.6	16.27	21.24	18.5	21.81	18.43	22.44	17.32	16.4	15.77	15.75	17.43	16.12	16.05	15.71	19.2
2.69415	1.42983	0.134012	0.659287	1.87166	221.994	365.2	16.94	17.5	17.92	17.68	18.19	18.63	18.59	17.69	18.39	18.47	18.66	18.7	18.62	18.03	18.31	18.03	18.3	16.29	18.16	13.94	18.3	18.39	12.15	17.84	17.77	17.1	12.89	17.92	17.13	18.51	13.29	17.25	13.85	18.19	19.09	17.86	18.11	12.37	19.38	18.58	18.75	12.07	14.02
0.397223	-1.33198	0.14558	0.678639	1.87024	169.122	359.5	17.26	18.01	18.12	18.65	13.6	18.08	13.69	13.55	17.54	13.17	16.75	13.96	14.23	18.69	14.08	19.34	18.7	17.97	18.83	16.98	18.49	14.61	18.09	17.26	18.7	13.93	18.18	14.43	14.02	18.04	18.48	18.07	18.32	18.06	14.17	14.88	16.44	17.67	17.4	17.3	18.4	17.4	18.27
0.539405	-0.890559	0.0320689	0.458999	1.86768	351.1	42.4	17.22	18.69	18.25	15.43	15.43	18.72	15.18	15.28	18.05	15.05	18.92	18.58	15.72	18.46	15.61	18.04	18.4	18.22	15.42	18.08	17.31	18.13	15.1	15.57	18.71	18.33	18.31	18.05	18.82	18.31	18.05	17.36	18.18	17.96	17.37	17.53	19.07	18.53	18.63	16.56	18.92	18.23	18.16
0.311929	-1.68071	0.0875994	0.601556	1.86747	223.096	327.1	18.74	12.49	19.1	19.29	17.77	20.21	14.37	19.99	19.32	18.46	14.38	19.96	21.12	19.28	14.29	19.62	20.89	15.69	21.91	18.8	21.39	20.59	19.75	21.06	20.92	19.01	20.52	20.31	17.1	18.77	18.98	18.54	18.09	20.11	22.79	19	21.83	21.79	21.58	19.29	12.62	17.58	22.33
0.634588	-0.656108	0.0249639	0.448193	1.86526	527.436	493.1	16.18	15.46	15.22	17.1	15.93	16.82	16.09	15.59	15.27	15.84	15.58	14.21	14.4	15.77	15.9	16.59	16.81	17.09	15.87	16.56	17.33	15.76	16.1	15.24	17.5	15.56	15.67	17.38	16.68	15.38	17.12	16.29	17.44	16.57	17.01	16.45	15.74	16.61	16.58	15.83	16.85	13.38	17.2
2.11574	1.08116	0.0114333	0.307961	1.8643	86.5172	270.6	17.44	15.8	18.03	17.38	13.73	18.03	13.78	17.19	17.76	14.52	17.13	17.08	17.55	17.54	14.18	14.96	14.46	16.37	16.14	16.6	18	14.69	17.11	14.22	14.13	13.99	13.81	15.77	14.18	17.31	15.92	17.22	17.56	16.18	14.28	14.96	13.59	13.34	14.69	14.38	17.16	13.26	14.81
2.4086	1.26819	0.0259497	0.448193	1.85966	734.565	441.9	18.59	19.07	18.9	16.03	18.79	19.19	18.31	18.62	16.44	18.12	18.49	14.59	17.45	14.48	18.79	17.39	18.33	15.5	18.66	15.04	14.61	15.03	13.97	19.48	14.54	14.38	18.27	13.87	18.18	17.48	18.22	14.99	14.35	18.7	18.35	15.25	16.59	17.24	15.05	14.8	18.62	19.17	15.19
0.423146	-1.24077	0.0310986	0.454877	1.85814	825.72	592.3	15.75	10.54	12.21	14.33	10.32	10.73	15.26	14.89	15.3	10.09	15.95	13.23	11.33	12.93	16.43	15.32	16.43	10.83	16.53	14.1	14.93	14.35	14.25	14.36	13.84	14.92	14.47	15.54	15.28	15.13	13.08	14.71	14.5	15.32	13.53	16.73	14.91	14.67	11.9	14.92	14.66	15.53	16.04
0.162285	-2.6234	0.0103499	0.303677	1.85774	674.399	459.5	15.63	6.93	16.37	16.49	16.09	7.37	17.52	16.66	7.16	15.28	7.52	6.93	7.52	12.96	15.79	17.53	15.79	6.67	16.38	16	15.45	17.51	15.41	7.93	16.58	16.3	15.95	15.98	17.78	17.53	15.99	15.98	7.37	15.33	16.14	8.31	14.03	16.47	16.49	16.78	16.27	17.72	16.17
0.481	-1.05589	0.00918292	0.281891	1.85669	946.807	40.9	18.39	18.84	15.12	15.02	19.31	15.08	18.5	14.92	15.01	14.62	15.34	15.21	18.66	18.32	19.17	18.81	15.4	17.75	15.07	19.54	18.19	17.58	18.74	17.52	16.75	17.43	17.58	18.51	19.45	17.75	18.18	18.16	16.02	17.37	18.95	18.39	18.19	18.69	17.65	19.25	19.15	17.9	17.86
3.62505	1.858	0.0336581	0.4686	1.85587	284.22	338.3	16.7	16.96	15.39	17.56	17.5	17.15	15.68	16.04	14.54	15.48	10.92	14.36	16.47	16.88	17.44	15.61	15.79	16.45	15.98	16.32	15.2	16.44	16.57	16.75	16.84	15.62	16.62	16.26	13.92	9.65	15.48	16.76	16.94	11.29	10.35	11.47	10.09	9.53	11.1	10.94	16.4	9.15	11.05
0.490916	-1.02645	0.0108329	0.303677	1.84977	814.394	48.1	19.65	19.96	15.28	21.09	15.24	16.23	19.65	17.5	19.39	20.44	20.27	15.36	18.23	18.96	19.65	20.98	15.54	19.86	19.37	19.57	19.39	19.22	19.58	19.15	19.14	19.68	19.67	19.74	19	19.44	20.06	20.06	19.73	19.88	21.18	19.42	19.96	19.51	19.42	19.41	19.25	17.46	20.09
2.62618	1.39297	0.0496161	0.536452	1.84736	775.2	482.9	14.25	13.91	13.66	15.54	15.08	14.04	16.94	14.6	15.42	17.5	10.83	16.56	14.55	16.81	10.54	15.4	10.51	15.82	14.72	12.68	15.56	11.12	12.93	10.71	15.69	10.61	13.08	12.76	14.56	14.71	11.74	11.49	14.5	14	15.7	11.38	11.74	16.08	11.01	10.86	14.49	15.1	11.01
1.61943	0.695484	0.0816107	0.59444	1.84717	833.781	41.4	18.7	17.23	18.22	18.63	16.51	18.72	16.57	16.6	16.86	18.13	18.46	18.5	18.65	16.55	18.82	16.76	16.59	18.64	16.55	17.05	18.25	19.03	16.73	17.47	18.26	17.4	16.96	17.37	17.25	16.17	17.2	17.2	16.73	16.46	15.25	17.02	14.67	15.73	17.43	17.38	17.78	18.84	17.69
0.252743	-1.98426	0.0777813	0.591445	1.84624	1046.63	392.5	17.21	18.98	12.63	17.55	16.57	19.82	18.89	20.04	12.25	11.83	19.14	17.4	12.94	19.76	12.91	18.66	13.27	21.47	19.04	20.87	18.34	18.28	19.82	19.53	20.08	20.34	16.56	11.43	12.72	20.68	21.17	20.25	19.42	18.78	13.93	16.64	20.14	20.9	17.4	19.52	18.77	18.54	19.13
2.64094	1.40105	0.0681851	0.574409	1.84573	855.208	575.9	11.52	12.45	15.7	15.32	16.46	16.46	14.71	10.78	15.89	14.93	16.49	15.06	14.16	11.6	17.21	12.42	11.81	15.21	13.04	12.34	11.69	14.47	12.18	16.61	11.64	11.75	11.27	15.78	11.36	11.01	11.72	12.67	13	16.69	16.01	12.78	11.01	16.51	12.32	12.16	15.22	16.3	13.22
0.337628	-1.56649	0.114086	0.61785	1.84383	1032.71	439.8	16.76	18.66	19.96	14.1	14.09	20.03	17.64	19.04	20.58	13.72	14.66	14.47	14.64	19.57	14.51	19.15	20.52	20.71	17.86	20.37	15.54	17.29	18.56	17.85	19.4	18.2	18.32	17.04	14.56	18.9	19.35	20.31	19.13	18.97	17.91	18.78	20.58	19.35	14.94	19.15	18.5	20.06	20.84
0.592736	-0.754538	0.0197693	0.40454	1.83974	740.613	585	19.43	18.61	16.38	16.34	16.38	17.34	19.3	16.22	18.78	16.15	18.25	18.03	17.85	19.19	19.34	18.51	16.53	18.91	16.31	18.93	18.9	18.06	19.74	19.29	19.73	18.72	18.38	18.52	16.61	18.81	19.39	18.57	18.64	18.93	19.25	19.22	18.81	18.96	18.4	18.72	19.44	18.99	19.19
0.592595	-0.754882	0.113589	0.61785	1.83952	484.281	391.3	14.99	17.47	17.07	16.36	16.44	17.55	17.78	17.98	17.41	17.02	17.88	14.94	17.72	18.02	17.85	17.76	17.35	19	15.8	17.48	17.58	18.33	18.27	18.17	18.46	18.08	18.1	17.55	18.28	19.08	18.82	17.63	18.63	18.33	15.11	17.1	17.93	18.25	18.14	17.83	17.91	18.6	18.2
0.263708	-1.92299	0.0108563	0.303677	1.83799	1143.75	41.3	17.24	19.31	12.43	12.02	11.77	12.21	17.89	12.01	19.51	11.58	17.2	16.49	12.82	17.7	18.98	19.68	13.08	12.31	19.89	13.39	18.77	18.47	12.58	18.87	18.88	17.52	18.2	16.86	12.57	17.47	17.74	18.73	18.84	18.89	19.21	17.21	17.55	15.14	19.07	17.4	18.26	18.27	18.79
0.493668	-1.01839	0.144973	0.677243	1.83784	1053.18	430.9	17.05	17.53	19.05	17.47	18.36	18.12	16.65	17.79	18.79	15.1	14.19	12.78	18.02	17.51	12.99	17.19	18.59	19.05	17.9	18.92	16.73	13.73	17.69	17.68	17.74	17.27	17.89	16.98	18.4	18.21	17.5	17.9	18.16	16.9	17.89	18.5	18.44	18.64	17.31	17.53	16.59	18.52	18.64
0.497309	-1.00778	0.0107919	0.303677	1.83727	896.8	42.3	19.42	18.66	16.29	16.23	16.27	16.21	19.86	16.14	19.67	16.04	19.97	16.33	18.83	19.32	19.84	21.26	16.45	18.5	16.21	19.67	19.82	19.29	18.93	17.84	19.44	19.28	19.09	19.91	16.53	18.63	19	19.68	19.95	19.38	20.22	20.06	19.45	19.22	19.11	19.98	17.33	19.72	18.98
0.350954	-1.51065	0.154777	0.691709	1.83647	541.306	379.7	12.58	13.59	12.1	11.68	14.01	15.41	12.02	17.74	15.26	11.27	15.31	18.17	18	12.43	16.73	17.78	16.03	18.44	15.71	13.15	12.46	13.21	17.79	15.25	14.84	17.74	14.41	16.58	17.81	16.03	17.88	16.66	13.69	15.84	12.4	13.55	16.27	15.77	18.05	13.74	14.37	18.37	17.66
3.86991	1.9523	0.0115145	0.307961	1.83489	382.242	273.3	16.69	15.77	9.82	17.12	15.98	17.29	14.27	16.75	16.65	14.85	17.1	10.17	15.59	16.91	17.26	10.9	10	9.82	15.65	14.76	16.87	10.92	17.38	14.3	10.21	11.41	14.88	14.69	16.72	16.59	10.32	11.25	14.64	16.96	15.18	11.13	9.82	17.12	16.46	10.58	16.78	16.1	10.83
1.72257	0.784559	0.0464076	0.520144	1.83049	762.386	408.2	17.86	16.2	17.45	16.19	16.35	17.92	17.95	16.03	16.96	16	18.61	16.58	16.59	14.93	18.2	16.56	16.67	13.64	16.14	14.5	16.2	18.1	18	17.45	16.4	16.92	15.81	15.8	16.54	15.84	13.9	18	15.7	15.81	16.68	16.39	15.87	15.42	14.56	17.81	16.62	15.38	15.55
4.15646	2.05535	0.042325	0.504184	1.8141	1714.27	412.3	13.13	18.08	17.53	12.23	14.71	19.32	12.56	18.99	19.8	18.57	20.18	18.63	19.45	18.44	19.32	13.83	19.78	18.92	16.86	13.58	12.95	13.66	11.88	19.27	12.96	12.95	12.53	17.76	13.71	12.02	12.92	20	12.2	19.44	17.85	18.19	12.32	11.85	13.74	13.33	18.15	18.58	13.58
2.26938	1.1823	0.0517516	0.539833	1.8123	348.179	557.8	15.23	11.4	15.66	11.25	15.66	15.35	15.45	13.1	16.66	15.75	14.56	16.09	16.01	16.53	16.62	13.03	16.28	15.32	16.1	12.76	15.74	12.87	14.42	12.2	14.46	15.85	13.18	13.66	15.77	11.23	15.77	13.05	13.39	16.07	11.99	13.16	11.49	11.99	15.2	13.91	11.49	16.62	12.69
3.44904	1.78619	0.0341001	0.470459	1.81224	210.17	291	13.67	19.64	19.34	19.7	19.95	19.63	20.37	19.59	19.46	19.16	19.83	19.51	19.72	19.09	20.12	14.44	19.36	19.52	13.22	19.93	13.56	14.28	19.41	13.67	20.39	19.99	14.26	12.33	13.46	18.71	19.31	19.33	19.15	19.56	13.7	19.67	19.02	19.64	20.05	18.82	19.82	19.64	14.28
0.431921	-1.21116	0.0577415	0.559298	1.80837	301.119	58.4	12.9	16.87	12.37	13.52	11.74	15.61	16.8	16.72	11.97	16.71	17.05	15.52	12.77	15.66	16.45	16.04	15.01	16.71	17.43	14.82	17.28	15.88	16.75	16.97	17.34	16.97	17.19	11.12	12.52	14.82	15.61	16.34	13.08	17.84	16.53	16.29	15.32	15.89	16.94	17.43	17.27	17.32	16.44
0.521831	-0.938344	0.0409087	0.498428	1.80806	451.154	485.4	14.17	11.19	10.32	15.76	16.57	14.75	13.95	11.81	15.8	14.65	16.4	16.23	15.08	14.04	14.1	16.65	16.24	16.2	14.11	14.12	16.18	16.67	14.51	14.02	13.89	15.07	16.29	14.89	15.65	15.7	16.1	14.93	13.94	15.75	13.69	14.68	16	15.37	15.46	15.8	14.34	14.91	16.06
0.48885	-1.03254	0.0528467	0.544356	1.80804	565.262	282.4	13.46	16.68	15.29	12.66	15.93	14.54	15.46	15.47	16	12.33	13.66	14.7	16.52	15.79	13.38	17.33	16.09	12.98	16.8	15.91	17.95	14.08	17.29	17.34	15.44	13.33	17.18	16.5	16.01	12.49	15.28	14.18	13.9	16.13	16.43	16.98	16.05	15.59	17.11	13.73	15.16	17.45	16.82
0.539405	-0.890559	0.186291	0.705684	1.80684	1983.35	417.2	18.14	18.87	21.01	19.28	16.26	19.77	17.96	19.61	19.3	16.02	16.37	16.32	19.52	18.93	16.43	19.94	19.21	20.24	19.18	19.67	17.97	17.43	19.71	19.27	19.7	20.04	18.06	20.01	16.51	20.09	19.97	20.44	19.59	17.91	16.57	17.92	19.06	19.97	18.84	19	18.57	20.1	20.25
0.397703	-1.33024	0.0217744	0.417548	1.80591	1193.56	435.7	15.69	12.81	18.23	17.24	12.84	17.08	16.89	17.56	13.05	12.61	13.87	13.39	16.4	15.93	13.55	17.14	13.79	13.21	14.28	17.65	15.4	14.24	17.42	17.03	16.42	15.93	13.11	17.37	17.63	12.62	18.7	16.36	16.99	17.59	15.92	18.54	18.62	16.73	18.76	17.75	18.63	18.28	14.22
0.594426	-0.75043	0.0293993	0.448193	1.80514	131.961	586.6	18.44	17.62	15.61	17.86	15.56	15.55	17.86	17.45	18.67	18.34	15.74	17.84	15.85	17.59	15.72	17.96	15.85	17.7	18.43	18.79	18.27	16.79	17.87	15.69	17.76	18.12	17.8	17.77	19.11	18.49	17.56	18.47	17.7	15.26	18.28	17.21	18.72	18.04	17.81	18.87	18	17.85	18.94
0.468049	-1.09527	0.109353	0.612862	1.80335	521.284	391	19.5	14.73	18.93	17.88	15.05	15.09	17.87	18.64	18.42	14.63	15.35	15.21	18.57	18.33	15.25	18.43	18.58	19.05	15.07	15.53	18.01	17.98	19.2	18.93	18.19	18.47	16.45	18.14	16.4	19.27	18.79	19.09	17.9	18.04	15.4	15.66	17.52	18.51	19.26	19.21	15.11	18.99	19.46
0.576416	-0.794817	0.201007	0.721025	1.80284	590.381	453.9	16.88	16.88	16.73	18.04	17.43	19.14	17	18.21	18.46	17.29	15.32	15.19	15.35	19.22	15.22	17.87	18.82	19.53	17.26	19.89	17.71	16.43	18	17.5	17.44	16.75	15.97	17.39	17.14	17.97	18.94	18.85	17.96	16.98	16.76	17.17	19.23	19.36	17.29	17.58	17.46	18.1	19.42
1.72424	0.785957	0.00202329	0.116734	1.80155	205.962	217.4	16.28	18.96	19.37	18.31	17.41	18.75	17.56	17.89	18.17	17.35	17.94	17.09	17.74	17.35	16.9	15.63	15.2	17.26	17.72	16.18	18.57	15.28	18.31	18.83	17.32	14.7	17.16	16.67	17.88	17.43	17.78	15.17	16.54	17.17	18.17	15.48	18.2	17.99	16.91	17.83	18.4	16.47	18.26
0.295803	-1.75729	0.150502	0.683591	1.80098	617.301	337	8.92	14.21	13.34	8.73	14.62	15.21	16.02	15.09	14.62	7.81	15.52	14.66	15.57	16.02	8.92	15.38	10.09	14.09	16.09	15.87	15.05	15.41	16.46	16.08	15.53	9.21	15.12	12.12	15.4	16.26	15.74	17.3	16.04	16.03	8.73	16.1	14.94	14.97	16.98	17.13	13.14	16.09	15.69
0.163621	-2.61157	0.0253949	0.448193	1.79813	538.798	45	19.67	10.35	19.02	10.51	19.35	10.47	19.75	10.32	19.03	9.76	20.06	10.96	11.1	19.53	19.49	11.72	19.34	11.63	10.54	20.2	19.71	19.07	19.68	18.41	20.69	19.17	19.29	18.81	10.83	19.08	19.16	19	18.19	19.66	20.81	19.98	18.93	18.32	18.83	18.84	10.38	17.07	20.23
0.384247	-1.37989	0.0189865	0.395758	1.79522	720.837	41.4	17.43	16.92	19.7	17.77	18.51	18.2	18.27	16.47	12.62	12.02	13.5	17.34	13.22	16.36	13.22	18.87	18.47	13.86	18.05	17.69	17.68	19.04	18.38	13.34	17.73	17.94	17.65	18.74	18.09	16.42	17.12	18.65	17.33	15.76	17.95	18.61	12.64	17.26	18.34	18.24	17.14	18.98	15.69
0.422251	-1.24383	0.149789	0.683551	1.79522	1319.33	430.4	18.18	15.26	17.17	15.93	15.09	19.3	18.31	17.88	17.5	12.7	13.94	13.46	16.8	14.43	13.62	14.47	13.87	19.39	17.5	19.02	17.37	14.3	17.24	17.64	18.86	15.58	17.74	16.42	17.69	18.13	17.57	17.45	17.76	16.6	18.16	15.82	17.28	19.43	17.83	16.46	12.96	17.48	18.03
3.18713	1.67226	0.0154156	0.361242	1.79205	253.143	288.3	17.86	16.55	17.47	17.71	17.14	17.11	16.2	16.76	17.19	17.4	17.46	16.94	11.27	17.01	17.03	11.92	11.33	16.62	17.64	17.24	13.68	11.99	16.73	11.43	17.06	15.03	15.75	10.51	16.95	17.16	17.37	12.23	17.04	10.94	17.18	12.28	15.87	17.25	17.04	17.64	18.26	17.35	16.16
0.558344	-0.840774	0.180605	0.703149	1.78394	452.312	451	17	19.52	16.69	15.86	17.29	18.29	17.74	18.18	17.52	16.9	17.41	14.96	19.69	18.17	14.97	19.74	19.4	17.32	16.89	18.61	16.9	16.76	19.37	18.52	17.22	17.09	18.46	17.64	16.69	17.2	18.9	18.67	18.92	16.95	17.45	18.2	19.43	17.98	18.96	20.14	16.92	16.77	20.06
0.48366	-1.04794	0.00412505	0.167697	1.78176	240.232	330.8	17.81	19.05	18.08	17.7	16.56	17.64	19.64	17.94	18.76	17.2	18.09	15.51	17.83	17.75	15.25	20.9	16.42	19.68	21.81	18.92	16.26	20.83	14.18	17.67	17.6	18.36	20.98	19.04	18.23	18.42	17.76	18.4	17.93	20	20.44	20.3	16.39	17.5	17.94	19.35	18.86	18.82	18.72
1.92231	0.942839	0.0351186	0.470928	1.78111	578.351	321.8	17.56	13.76	14.29	16.5	17.05	16.9	17.25	16.67	14.02	17.61	18.28	18.62	16.89	17	17.77	15.12	14.64	16.79	17.12	14.8	14.29	14.85	16.44	15.56	14.32	14.15	17.08	17.37	17.55	17.25	14.27	14.84	16.82	17.8	14.51	15.09	17.88	16.9	14.84	14.58	17.63	16.13	14.96
1.70073	0.766151	0.00920952	0.281891	1.78103	1159.84	414.2	18.88	18.2	19.12	19.36	18.53	18.12	16.59	19.84	19.65	19.42	19.15	16.82	19.29	19.53	19.06	17.24	19.08	19.74	16.75	16.94	18.56	16.95	16.5	16.85	16.75	16.61	18.69	16.56	17.02	19.61	19.41	18.89	19.32	18.23	18.46	17.06	17.57	19	16.93	19.5	19.08	19.17	17.04
0.580659	-0.784237	0.0123974	0.327663	1.77961	871.794	41.9	18.49	18.48	16.11	19.11	18.23	18.82	18.36	15.92	16.04	15.84	18.74	16.15	16.3	19.24	18.75	20.37	16.29	17.91	18.58	17.26	18.75	19.79	17.31	19.68	18.45	18.01	19.15	18.04	16.35	19.86	17.96	19.15	18.57	18.49	18.65	18.55	18.62	18.43	18.02	18.56	18.7	18.01	18.61
0.512993	-0.962989	0.0167856	0.378008	1.77943	756.035	50	15.9	15.73	16.91	16.21	16.27	15.54	17.48	13.95	12.94	12.49	13.78	15.46	17.24	18.78	16.03	14.32	16.79	18.64	16.03	16.04	17.33	16.58	16.15	13.56	15.68	15.96	16.47	15.71	15.14	15.91	17.91	17.45	18.34	17.73	17.09	15.42	16.12	16.37	17.34	16.13	18.1	17.74	17.87
1.44055	0.526624	0.0291308	0.448193	1.77718	537.242	578.6	15.87	15.35	15.51	15.73	14.26	15.35	13.14	15.52	15.14	16.06	15.5	15.93	15.44	15.67	15.86	15.98	15.86	14.47	14.64	14.2	13.54	14.96	14.27	15.28	13.52	15.15	14.75	14.81	15.75	15.44	13.52	15.4	15.45	14.77	13.67	16.16	15.16	15.34	14.31	13.88	15.68	15.19	14.26
0.575326	-0.797548	0.158679	0.694957	1.77707	199.148	508	12.97	14.69	14.81	11.92	11.49	14.86	14.15	15.08	14.91	14.1	16.16	15.47	14.87	14.8	11.91	15.71	15.63	13.38	15.62	15.62	14.36	11.49	15.72	15.15	14.62	15.86	14.49	15.22	16.33	15.16	15.84	14.78	14.11	13.43	15.59	15.72	16.31	15.91	14.96	14.74	14.34	14.54	14.43
0.532622	-0.908817	0.164076	0.694957	1.7756	490.292	372.8	18.41	15.45	19.02	17.03	18.51	18.77	17.74	15.58	19.56	18.04	17.99	18.17	16.02	18.79	15.92	19.83	19.24	15.71	18.61	19.26	18.93	17.39	20.04	19.92	18.26	17.66	19.48	16.57	18.91	19.39	19.82	19.29	19.51	15.47	17.78	18.87	17.83	19.29	18.68	18.92	18.17	15.43	19.49
0.321187	-1.63852	0.0800422	0.591445	1.77547	789.676	594.3	8.52	8.63	8.17	13.46	13.02	12.3	13.9	7.93	13.32	13.18	14.79	8.42	8.52	13.04	14.19	15.85	13.89	13.88	14.48	15.67	12.93	9.35	13.93	14.49	14.79	15.41	14.74	12.29	13.21	12.6	13.57	9.59	13.78	13.87	15.35	9.53	15.63	13.2	9.01	9.21	10.51	13.46	14.9
1.5318	0.615226	0.0235099	0.438898	1.76673	685.432	583.7	16.46	17.92	18.1	17.33	18.87	17.48	16.1	18.66	18.41	18.72	18.71	18.19	17.48	16.3	17.55	18.75	16.48	17.69	18.36	18.01	16.49	16.53	17.36	18.46	16.3	17.63	16.13	15.99	17.67	18.41	16.22	17.27	18.25	17.8	16.61	16.67	18.11	16.03	16.54	16.36	18.31	16.06	16.66
1.79502	0.844	0.0180273	0.391025	1.76482	156.174	334	18.28	18	20.4	20.92	20.41	20.9	21.23	20.31	20.74	21.54	20.82	21.7	20.66	21.91	21.54	18.36	20.48	20.32	20.75	21.3	19.41	18.23	20.18	20.72	18.13	18.05	20.72	21.07	20.63	21.2	18.1	17.91	21.21	21.02	20.75	18.31	20.94	20.72	18.14	21.03	18.23	20.41	18.24
0.363092	-1.46159	0.294624	0.792819	1.7636	283.131	371.9	14.01	15.31	17.02	10.35	11.9	15.72	14.55	16.41	16.6	14.26	10.13	15.83	17.08	16.03	9.76	16.23	18.09	17.63	15.92	16.4	16.39	10.66	18.2	16.84	15.4	16.2	15.81	13.38	12.38	16.33	17.21	16.53	15.92	14.57	14.28	10.88	15.79	16.88	15.81	16.54	14.35	16.84	17.22
0.587564	-0.767183	0.0258863	0.448193	1.76091	154.486	36.3	15.26	14.8	16.03	15.07	14.15	14.02	15.58	14.03	12.27	14.71	14.35	14.71	14.02	15.13	14.38	12.99	16.76	15.39	15.17	15.34	14.5	16.02	15.63	14.62	17.11	18.29	15.96	13.79	15.57	16.21	15.55	16.01	15.17	13.69	15.64	15.75	15.35	12.66	15.66	14.84	14.88	13.78	16.81
1.68315	0.751161	0.0190805	0.395758	1.75965	731.603	421.8	19.18	19.43	18.41	19.23	18.83	18.92	18.89	19.29	18.79	17.31	19.14	19.2	18.95	16.36	19.56	16.92	18.99	18.7	18.58	19.18	18.65	16.59	18.44	17.76	16.35	16.24	18.7	18.92	19.36	19.03	16.29	16.32	19.28	18.75	19.37	18.82	18.98	18.81	17.85	16.43	19.45	18.87	16.72
0.486103	-1.04067	0.183567	0.704727	1.75815	1063.68	396.5	21.16	22.17	23.21	22.33	20.46	22.82	21.91	23.62	24.11	20.85	18.56	20.66	23.48	22.7	18.95	22.6	24.43	24.81	22.95	25.37	21.55	22.52	23.79	20.93	22.84	22.61	22.17	21.44	20.15	23.84	24.96	24.04	23.37	21.56	19.36	22.46	23.28	24.96	22.15	22.63	20.68	23.94	22.88
2.35068	1.23308	0.0112792	0.307961	1.75563	536.8	44.8	15.87	19.4	20.13	18.19	20.16	18.42	15.47	19.26	19.94	20.28	20.19	19.04	17.58	19.73	15.87	16.38	20.18	20.1	18.69	16.03	18.98	15.98	17.86	18.14	15.72	15.58	15.56	19.56	19.01	15.32	15.66	15.79	19.31	15.43	16.06	16.14	19.69	15.4	16.03	15.85	19.67	15.39	20.03
2.96299	1.56705	0.143079	0.676351	1.74905	445.223	554.8	14	13.85	15.55	8.17	15.33	8.52	13.13	11.13	8.05	13.23	13.31	13.6	14.11	15.29	13.66	9.82	8.84	9.53	11.04	12.66	8.84	9.86	8.17	12.74	12.25	15.05	8.63	12.2	8.84	13.54	12.71	9.97	8.73	12.59	14.2	11.36	12.84	12.59	14.51	9.59	13.59	7.52	13.55
2.8827	1.52742	0.0546157	0.55007	1.74687	1034.77	41.9	16.63	18.49	17.88	16.32	17.82	18	15.14	17.61	18.25	17.52	18.15	17.09	18.63	13.62	17.3	17.36	13.15	12.36	19.18	13.48	15.88	13.57	16.09	12.96	12.85	12.83	16.64	17.73	12.61	11.92	16.33	17.96	15.66	16.8	18.6	17.88	18.12	15.68	17.16	19.96	12.17	17.77	17.54
0.339095	-1.56024	0.045733	0.516552	1.74499	123.1	306.1	14.85	17.74	11.92	15.13	11.34	11.71	11.88	11.6	17.48	11.13	16.41	12.02	12.29	17.98	16.11	16.85	12.63	16.9	11.77	15	15.56	13.96	15.4	17.32	12.42	16.76	16.45	10.66	12.1	15.09	14.94	17.14	15.45	14.19	17.8	16.74	17.36	14.18	18.2	17.69	17.27	17.41	16.7
0.639927	-0.644022	0.15459	0.691709	1.74004	576.466	581.7	15.99	15.11	15.84	14.83	13.32	16.15	13.47	16.44	16.11	12.96	16.25	16.05	15	16.03	16.63	16.35	16.41	16.27	16.36	16.71	16.05	15.97	15.74	16.28	13.76	16.65	16.17	15.95	13.75	15.56	17.32	16.86	16	15.85	16.94	16.61	15.83	15.84	16.19	16.11	16.15	15.86	15.84
1.94337	0.958559	0.00845466	0.268524	1.7363	366.247	277.5	14.02	16.79	13.85	17.51	16.96	17.33	17.74	17.69	17.81	16.85	16.12	16.62	17.24	15.77	17.53	14.75	14.18	15.78	17.41	14.47	13.87	14.52	16.59	17.26	13.86	13.82	16.86	16.2	16.57	16.72	16.52	14.54	15.99	14.34	14.01	14.79	18.02	17.56	17.82	14.17	17.45	17.5	14.61
2.24008	1.16355	0.0209725	0.414296	1.73586	232.807	47.9	18.71	18.93	16.63	17.85	14.26	13.26	13.27	15.61	18.43	16.19	16.39	16.82	17.25	17.96	18.94	14.54	16.8	16.32	16.14	15.96	15.53	16.45	17.17	16.46	15.78	17.71	16.79	12.45	16.69	16.19	13.63	14.39	13.15	12.94	13.8	14.61	13.12	17.62	14.4	17.04	16.34	15.48	18.59
0.280846	-1.83215	0.0585018	0.560918	1.73569	286.142	368.9	18.51	20.37	19.77	13.82	19.73	13.94	21.85	24.65	19.12	21.12	17.66	14.28	22.68	21.36	21.29	23.4	24.96	17.29	24.08	19.68	24.58	22.46	20.96	25.05	19.28	21.71	20.83	22.19	15.43	20.53	23.18	18.86	20.9	22.31	19.84	22.33	21.55	21.77	21.84	19.61	23.24	21.79	14.92
0.511169	-0.968129	0.0995417	0.61062	1.72996	501.278	375.7	14.89	18.55	14.74	17.9	14.54	18.3	18.27	19.04	18.41	14.14	14.96	18.13	18.6	17.66	17.89	18.54	18.66	18.87	18.08	18.32	17.93	17.75	19.01	18.57	18.04	19.47	15.6	18.03	16.15	18.99	19.05	18.2	18.72	18.27	15.01	17.95	18.81	19.02	15.2	18.73	18.93	18.64	15.36
0.342969	-1.54385	0.064503	0.568585	1.72897	287.147	372.3	14.67	18.02	17.36	14.22	17.1	14.34	20.12	22.3	15.91	18.8	14.75	14.57	20.39	19.69	20.72	20.8	22.41	14.38	21.23	17.27	22.28	20.18	18.6	22.43	19.25	19.79	18.36	20.06	14.67	17.74	21.05	18.39	18.14	20.1	18.48	20.09	18.75	19.79	19.59	19.27	20.32	19.65	15.16
1.53733	0.62043	0.0853449	0.597324	1.72769	736.812	41.1	19.44	19.04	18.85	18.02	18.7	18.51	18.99	18.61	18.21	19	18.98	17.99	19.5	17.41	19.15	18.69	17.65	18.83	19.19	16.23	18.73	19.95	16.74	19.22	18.35	18.25	18.14	17.89	18.67	18.96	15.9	17.53	18.53	18.09	16.29	18.09	19.03	18.05	16.27	18.79	19.31	17.97	18.29
1.96677	0.975828	0.0931662	0.61062	1.7271	182.19	555.5	16.31	13.94	16.23	15	15.7	11.9	12.09	14.17	16.27	15.44	14.52	15.13	16.19	14.54	16.23	15.05	15.31	12.07	16.06	13.19	15.65	13.24	14.47	15.62	16.3	14.84	15.67	13.39	13.23	11.69	15.74	13.48	11.69	13.9	15.66	13.58	11.95	11.34	13.3	12.99	13.17	13.04	15.48
0.656076	-0.608065	0.218314	0.737142	1.72637	203.059	361.6	13.38	15.56	16.29	14.91	17.24	16.67	14.77	16.5	17.72	15.92	16.53	16.52	17.32	16.93	15.69	16.67	17.8	15.63	17.33	16.4	18.06	16.34	17.76	17.57	16.59	16.38	15.99	16.53	16.51	14.67	17.64	16.25	16.3	15.41	17.13	16.84	17.34	17.07	16.93	16.72	16.27	16.27	17.71
1.72794	0.789054	0.11571	0.624164	1.72185	601.517	582.9	15.33	14.79	16.54	16.24	16.17	15.42	15.25	14.79	15.6	16.1	15.76	15.79	15.86	13.08	16.69	16.24	15.71	15.59	15.96	13.84	13.18	15.73	15.25	15.02	16.24	13.18	15.14	15.12	14.1	12.35	13.16	15.07	12.56	15.67	13.26	14.17	15.79	15.08	13.99	15.81	17.01	15.35	13.9
0.435334	-1.19981	0.0173235	0.382749	1.72152	796.983	430.7	19.4	19.44	14.75	19.65	19.45	14.64	18.97	14.48	20.6	20.23	19.01	19.72	20.67	20.51	15.92	19.87	15.06	21.27	19.22	20.83	18.82	19.12	20.66	19.93	20.34	20.1	19.99	19.88	19.92	20.44	20.95	20.37	20.44	19.8	16.71	19.54	20.48	20.79	19.88	19.92	19.33	20.78	20.5
1.62155	0.697376	0.112814	0.617832	1.72022	414.714	47.3	18.08	17.01	17.95	18.43	19.49	17.87	19.01	19.14	18.11	19.73	17.98	19.67	17.77	17.43	19.81	16.64	18.13	18.21	18.33	17.95	17.96	19.33	18.06	20.36	17.94	17.42	18	19.68	18.3	17.85	18.02	15.26	18.03	17.14	18.3	17.27	17.45	14.54	17.85	17.21	19.08	17.37	17.69
1.99315	0.995054	0.0344596	0.470928	1.71937	532.31	320.8	16.94	16.56	13.28	16.72	16.71	17.15	16.6	16.6	14.23	17.84	18.26	17.58	19.19	16.29	17.7	14.3	13.71	16.67	17.75	14.08	14.33	14.16	16.97	16.71	13.41	17.38	16.25	16.89	16.56	16.58	16.71	15.84	16.65	17.24	16.58	14.4	17.15	16.43	14.21	13.8	16.58	17.15	17.32
0.49997	-1.00009	0.107223	0.612125	1.71711	798.486	429.7	18.06	17.96	19.56	18.3	17.3	18.3	17.62	18.67	19.17	17.86	17.78	11.22	18.63	18.81	12.32	18.5	19.05	19.42	18.1	19.5	17.19	18.03	18.51	18.47	18.9	18.28	15.69	18.24	18.03	18.67	18.9	18.87	18.5	18.1	17.32	17.71	18.04	18.8	18.36	18.55	17.98	19.44	19.28
3.03677	1.60254	0.00394104	0.166971	1.71345	423.783	576.5	9.35	15.25	15.89	9.15	11.66	15.46	13.45	14.46	15.63	13.92	15.07	14.87	15.07	13.64	15.31	10.41	14.8	15.98	9.47	10.13	9.42	10.35	14.17	14.37	9.53	13.94	15.22	11.9	10.47	15.25	9.47	10.63	12.24	13	9.21	16.14	15.08	14.82	10.38	9.97	15.57	14.66	10.17
0.312292	-1.67903	0.0175629	0.385247	1.71066	583.759	330.8	16.59	19.96	12.39	18.66	11.75	17.22	19.44	11.97	20.2	19.94	12.99	19.55	12.8	17.65	16.99	17.33	13.05	18.67	18.69	16.83	19.33	17.85	18.06	20.79	17.98	20.72	21.29	21.3	20.27	17.24	17.56	16.91	16.81	19.9	18.96	16.93	18.66	17.85	13.53	20.44	17.16	19.87	14.34
1.73794	0.797376	0.184574	0.704727	1.7085	708.539	519.4	15.8	14.24	14.6	14.68	14.5	14.67	14.6	12.5	14.76	16.25	16.58	14.57	14.16	11.19	16.03	16.18	12.51	14.28	14.71	11.95	14.04	15.48	13	13.68	14.41	13.47	15.16	13.95	14.04	13.06	13.6	12.29	12.69	14.43	15.06	12.32	12.96	12.98	15.83	14.08	14.25	14.05	11.74
2.06819	1.04837	0.0361467	0.473429	1.70654	205.024	206.3	15.62	17.63	13.08	17.61	17.2	16.44	14.48	16.9	16.4	15.71	17.55	16.9	16.18	16.9	14.24	14.17	13.58	14.36	17.46	16.5	17.71	14.02	14.05	17.38	15.25	13.28	16.32	17.06	15.54	12.42	17.19	16.84	14.32	12.55	16.85	14.25	12.76	15.76	14.06	13.68	15.98	16.13	13.96
3.43687	1.7811	0.103397	0.610923	1.70475	251.037	347.8	13.59	14.97	13.81	14.04	15.99	8.92	8.42	14.19	14.18	13.36	16.29	16.66	13.36	14.84	18.19	10.09	15.66	14.77	9.21	14.73	9.08	14.76	10.32	12.66	16.51	9.28	9.01	16.07	15.08	8.17	14.07	10.28	9.08	14.26	13.78	10.28	9.86	15.06	10	9.76	8.84	13.72	15.23
0.636066	-0.652753	0.150983	0.683591	1.70415	373.313	348.8	16.19	16.07	16.91	16.61	18.18	17.33	17.05	17.66	18.09	17.58	15.81	18.22	16.89	16.2	14.33	17.6	15.69	18.07	16.52	16.66	16.26	16.39	17.85	17.52	16.98	17.72	18.21	16.54	17.44	18.25	18.32	19.2	18.8	17.94	15.53	16.54	17.33	17.7	17.64	17.54	16.73	17.78	18.79
0.673145	-0.571011	0.163664	0.694957	1.70295	549.245	383.2	15.78	16.03	18	15.77	17.07	15.98	15.67	16.69	18.63	15.86	16.12	16.11	17.35	17.48	14.19	16.55	17.76	17.46	16.92	16.89	17.43	17.51	17.65	16.42	15.84	17.63	17.04	16.64	16.32	17.23	17.39	17.23	16.86	16.19	16.93	16.95	17.37	16.59	15.68	16.86	15.06	17.41	18.37
0.531337	-0.912301	0.0906744	0.603504	1.70122	173.973	578.5	15.29	15.27	11.51	15.58	14.73	11.29	11.36	15.19	15.65	15.28	14.5	15.14	16.67	11.8	12.82	12.85	14.57	15.4	15.18	16.54	15.39	15.03	15.28	16.81	14.53	15.01	15.64	14.38	16.37	15.87	15.82	12.93	14.94	14.63	16.11	13.02	15.97	14.98	15.86	15.87	14.69	14.04	15.67
0.632642	-0.660538	0.0500979	0.536494	1.70104	786.829	42.1	21.21	20.92	18.65	18.81	18.98	18.76	20.75	21.84	21.06	18.82	20.95	18.96	19.73	20.85	21.41	22.37	18.77	20.44	18.85	19.78	21.78	21.04	20.74	20.67	21.21	20.76	21.19	21.64	19.04	20.65	20.56	21.25	21.61	21.24	21.42	21.5	20.72	20.87	20.92	21.92	20.89	21.03	20.64
4.43345	2.14843	0.0308942	0.454877	1.69955	120.023	201.1	17.11	16.18	15.23	9.82	17.04	15.99	14.34	14.9	17.18	7.99	17.01	15.19	13.97	8.84	9.08	10.13	9.28	15.93	9.28	16.01	9.15	10.09	8.63	14.8	9.28	9.35	14.56	10.17	9.15	16.65	17.19	10.33	9.15	15.7	8.84	10.32	9.15	16.65	17.11	9.82	8.92	11.19	9.71
0.595065	-0.748882	0.0693411	0.574409	1.69871	163.123	567.9	15.59	15.63	14.83	15.96	13.43	16.52	13.6	16.36	13.57	13.03	17.09	16.62	15.31	15.09	16.94	16.55	15.78	16.2	16.42	17.1	16.36	16.91	16.61	17.28	16.36	16.25	16.62	16.28	15.57	16.09	16.62	16.77	15.69	16.5	15.58	16.94	13.34	13.1	16.74	15.52	14.81	16.53	16.96
1.89649	0.923333	0.0597594	0.561654	1.69863	855.482	488.5	14.47	16.3	16.95	17.5	17.5	15.69	16.55	17.28	16.32	13.59	17.89	16.71	18.03	14.26	17.31	15.15	14.67	14.15	17.14	14.82	14.34	14.87	17.54	14.43	16.89	14.18	17.97	13.53	17.45	16.99	14.3	14.86	16.02	17.06	14.57	15.81	13.88	13.63	14.86	14.61	16.4	13.6	15
2.75178	1.46037	0.0306404	0.454877	1.69778	809.411	519.4	10.21	16.14	14.2	13.81	12.71	9.21	15.76	13.48	13.47	15.88	13.89	14.2	14.96	14.18	14.02	10.21	13.93	13.83	13.38	9.86	13.35	10.13	13.08	13.88	14.12	9.42	14.32	11.23	16.44	10.51	15.12	10.41	13.22	14.98	9.01	10.35	9.21	13.95	10.09	14.96	15.37	12.79	9.86
3.20896	1.68211	0.00244584	0.130831	1.69723	621.302	351	13.63	19.18	18.45	14.09	18.39	17.85	19.06	18.84	18.66	18.88	19.43	19.41	19.06	13.47	18.98	14.41	18.29	17.93	19.58	14.19	13.52	14.26	19.34	19.38	13.49	13.52	18.9	12.3	13.43	19.51	13.51	14.3	18.78	12.81	13.66	14.49	19	18.92	14.3	13.86	19.89	19.17	14.25
2.13882	1.09682	0.126353	0.645366	1.69666	718.779	306.1	17.13	17.25	17.14	17.63	17.75	16.55	17.41	15.87	12.48	16.27	17	16.45	17.16	16.71	17.12	14	16.56	17.68	12.68	17.99	16.15	17.51	15.76	13.22	16.79	17.33	12.65	15.78	12.88	16.06	15.67	17.63	16.55	17.87	17.29	14.08	16.67	16.82	16.91	13.51	12.48	14.98	14.66
0.374041	-1.41873	0.0667278	0.574409	1.69528	473.343	474.3	12.41	15.08	16.02	14.97	16.62	9.15	16.16	15.91	15.38	15.6	9.42	9.42	15.49	15.85	16.41	16.49	15.92	16.41	17.52	15.13	15.93	15.66	16.51	15.93	15.48	15.93	15.33	16.75	16.26	15.62	15.79	16.47	16.19	16.51	8.92	16.65	15.76	15.66	18.06	16.02	9.65	15.61	15.3
1.55784	0.639548	0.25216	0.778963	1.69469	525.392	585.3	16.39	15.96	16.67	15.95	16.25	16.14	16.19	14.04	16.12	16.74	16.87	16.06	15.67	14.32	17.17	16.09	14.74	15.85	14.26	14.89	16.73	16.67	16.04	14.5	14.42	14.23	16	16.51	16.86	13.65	14.38	14.91	14.16	16.45	16.83	16.61	16.18	13.76	14.92	14.67	16.7	16.14	15.06
0.259056	-1.94867	0.0125634	0.327663	1.69214	231.971	43.8	9.97	13.2	9.65	17.62	9.86	16.3	14.98	9.59	17.55	17.64	16.52	9.86	17.58	15.58	16.67	16.63	9.76	16.35	16.75	18.87	15.4	17.67	17.56	10.13	18.51	18.63	12.74	16.1	9.86	18.04	10.13	17.43	15.47	17.37	16.06	17.47	17.86	14.82	16.82	17.84	17.66	18.61	18.27
0.478183	-1.06437	0.0516787	0.539833	1.68937	649.395	519.6	10.9	13.73	16.16	13	13.62	11.33	10.54	15.49	15.31	14.39	15.42	14.55	14.76	10.76	14.71	15.36	13.63	15.98	13.32	15.68	16.3	15.87	13.54	14.35	16.42	14.99	13.92	14.28	15.79	14.38	15.53	11.88	15.27	14.42	16.42	16.21	13.78	14.44	17.32	11.31	15.99	14.21	13.7
1.5702	0.650946	0.084314	0.597324	1.68913	837.793	42.1	18.72	18.78	18.74	16.21	18.55	16.95	17.11	16.69	18.54	19.04	18.31	18.21	18.05	16.55	19.54	18.87	18.47	18.59	17	17.74	15.33	17.63	17.2	17	17.26	16.66	16.99	18.02	16.9	17.89	16.98	16.87	16.89	17.75	15.53	17.74	17.94	18.15	15.62	15.42	18.66	17.78	18.94
3.5137	1.81299	0.025822	0.448193	1.68872	512.265	388.2	14.28	19.84	19.04	21.39	16.13	20.08	13.85	19.83	16.49	16.73	22.67	21.9	20.42	14.1	20.49	15.02	19.02	18.1	16.15	14.71	14.15	14.75	19.43	20.64	14.16	14.04	19.57	21.24	20.74	16.2	14.13	14.74	15.05	22.41	14.35	15	13.64	15.3	14.75	14.44	17.8	20.3	14.87
1.9928	0.994796	0.0637882	0.567262	1.68793	217.158	214	16.87	17.08	13.82	15.93	14.84	16.62	17.11	17.33	13.49	17	16.71	15.4	16.26	13.79	17.13	14.74	14.15	15.9	13.61	14.45	13.84	14.51	12.96	13.97	17.51	17.14	16.94	12.75	17.08	14.85	13.86	16.21	14.66	13.15	14	16.59	13.29	16.78	16.57	16.85	13.34	12.88	16.82
2.88962	1.53088	0.0655033	0.570785	1.68724	256.643	519.2	13.78	12.62	14.56	9.08	12.53	13.28	15.64	13.56	13.52	15.46	9.53	13.18	14.88	9.01	15.53	10.32	15.2	13.08	14.32	14.96	9.28	10.25	8.73	13.98	9.47	10.47	12.76	12.68	13.37	8.52	9.35	10.51	9.28	9.15	13.57	15.92	9.47	16.22	10.25	13.41	9.08	11.93	10.05
0.470743	-1.08699	0.069876	0.574409	1.68404	864.804	41.9	14.01	13.2	17.12	15.97	18.34	18.41	17.57	16.91	17.26	16.6	17.45	15.4	19.15	13.81	17.4	18.01	18.14	17.99	13.64	19.12	19.55	17.48	17.47	18.26	13.86	17.48	14.6	17.58	13.8	19.6	18.42	18.48	17.29	18.71	18.25	19.79	18.31	18.29	17.78	17.76	18.44	16.93	18.29
0.526237	-0.926215	0.0969956	0.61062	1.68212	959.65	427.1	17.92	15.42	15.79	15.7	15.71	19.73	19.47	15.55	19.33	18.68	15.91	15.81	15.99	16.73	15.87	18.25	15.98	17.6	16.9	18.62	17.84	15.99	19.36	15.84	17.61	17.62	17.22	17.14	18.01	19.58	18.92	19.46	18.48	15.43	16.07	19	18.41	16.77	18.61	20.07	17.42	17.27	19.82
1.758	0.813935	0.120232	0.632049	1.68085	490.731	45.4	18.45	20.16	18.63	19.49	21.9	20.52	19.4	18.58	19.41	19.64	17.82	18.27	20.6	17.84	18.37	16.84	19.13	17.74	19.72	18.81	17.59	21.75	18.63	17.93	19.56	18.71	19.49	20.08	20.04	18.49	18.46	19.62	16.18	20.19	18.36	18.42	16.06	17.54	18.15	18.32	18.59	18.24	18.75
0.242285	-2.04523	0.026464	0.448193	1.67983	1109.66	395.2	16.93	18.53	18.14	10.25	16.05	10.28	16.65	10.17	18.49	17.27	11.27	16.38	10.92	16.48	11.01	18.12	10.94	10.43	18.78	19.48	15.33	18.45	19.21	11.12	18.91	17.92	18.14	17.06	16.7	18.83	17.92	19.27	18.27	18.17	10.83	15.05	18.98	18.73	12.64	18.55	14.8	16.8	18.08
0.466649	-1.09959	0.151668	0.684078	1.67964	1067.7	422.7	19.27	19.07	15.04	19.45	14.99	20.63	19.43	19.77	20.22	15.83	17.01	15.15	19.88	19.75	17.7	19.57	19.72	20.73	19.25	21.27	19.24	15.44	20.04	18.98	19.66	19.33	18.38	19.22	15.27	19.72	20.93	20.26	19.82	18.94	18.98	18.84	19.98	20.48	20.09	19.65	18.92	20.28	20.34
0.540089	-0.888731	0.0581494	0.559298	1.67924	285.157	537.6	13.3	12.44	12.93	14.93	15.26	15.31	15.71	12.33	12.56	16.61	15.84	16.24	15.58	13.03	13.17	15.82	13.43	15.45	15.44	16.78	16.03	15.69	15.63	13.31	16.08	15.35	14.76	16.06	15.68	17.73	15.32	15.34	15.94	13.3	13.21	14.14	12.59	15.9	16.13	15.03	12.52	16.03	15.75
0.395775	-1.33725	0.125364	0.645366	1.67869	342.308	467.1	15.75	15.48	17.27	16.39	8.84	16.69	17.28	16.67	15.6	9.08	16.7	9.53	16.64	16.1	15.41	16.19	16.56	16.62	9.42	16.73	17.78	16.61	16.86	15.82	15.81	16.96	16.56	15.74	16.39	16.7	16.48	16.82	16.52	15.78	15.31	16.08	16.34	16.32	16.54	17.2	16.96	15.85	17.16
2.93766	1.55467	0.0186903	0.393871	1.6786	264.216	277.6	17.25	16.91	17.17	16.77	16.46	14.53	17.29	17.94	17.27	13.96	12.49	16.66	16.61	12.04	17.32	13.1	12.4	11.66	11.6	17.67	17.25	12.95	17.33	17.59	17.81	12.24	17.72	11.72	11.95	16.71	16.54	13.13	17.68	11.63	18.02	13.24	11.57	15.8	14.99	15.72	11.55	10.83	17.35
1.48929	0.574624	0.0569042	0.557881	1.67786	348.237	299.9	17.51	17.77	15.31	17.61	17.66	17.61	17.3	16.59	17.77	17.98	17.2	18.38	17.93	17.92	16.96	16.01	15.57	17.69	18.17	17.53	15.41	15.65	17.26	17.18	17.65	15.19	17.46	17.54	18.24	14.86	17.03	16.27	17.37	16.17	17.35	15.8	17.69	17.19	16.74	17.03	17.11	17.34	17.94
0.481717	-1.05374	0.103323	0.610923	1.67277	170.961	578.2	13.93	18.38	13.77	16.92	17.39	16.83	13.43	17.8	13.41	12.9	17.2	18.67	17.33	18.57	13.83	15.45	14.06	16.9	16.87	17.76	18.3	17.41	17.28	13.9	17.84	17.17	17.39	16.61	17.96	18.56	17.61	16.66	17.47	17.73	17.81	14.72	17.95	17.94	17.43	18.15	18.19	17.69	17.67
2.00328	1.00237	0.0353851	0.471131	1.67063	1275.87	426.7	15.2	18.5	18.5	19.68	18.68	19.59	16	19.24	16.68	17.63	18.74	18.1	19.11	15.02	18.48	15.79	18.17	17.84	18.33	15.45	15.13	15.44	18.62	18.77	16.06	18.37	18.44	18.05	18.11	14.51	15.03	15.31	17.75	17.24	15.34	18.72	18.7	14.6	15.46	15.25	18.59	18.3	15.68
0.525602	-0.927957	0.0261954	0.448193	1.66861	787.676	594.2	14.82	11.23	13.71	11.05	10.83	14.04	16.02	11.08	14.12	12.39	14.99	11.69	11.97	14.39	16.17	14.55	14.17	14.2	15.05	15.65	11.9	13.51	14.26	14.72	16.14	13.52	14.19	14.63	11.62	13.07	14.07	13.84	14.68	14.63	15.37	14.35	14.21	13.99	12.55	14.68	14.18	14.19	16.53
1.96844	0.977054	0.107412	0.612125	1.66472	1037.74	41.6	18.15	17.26	17.32	16.89	15.49	19.02	19.74	16.8	16.94	18.54	17.81	17.88	18.81	16.38	18.9	19.66	16.5	16.51	17.48	14.39	17.49	17.28	18.48	17.25	18.55	18.07	16.05	14.12	16.81	16.22	13.79	17.84	16.37	16.46	17.56	17.33	17.43	12.93	19.13	14.08	16.96	17.98	14.51
0.575146	-0.798	0.0113481	0.307961	1.66149	430.372	595.5	14.73	10.41	10.71	12.2	13.08	12.91	14.25	10.38	13.29	12.86	13.88	11.01	11.13	13.77	13.67	14.86	11.13	14.57	13.79	14.36	12.1	13.45	13.05	14.12	14.28	13.48	13.33	12.4	10.88	12.39	14.07	13.31	12.85	13.17	14.37	13.63	12.39	13.16	14.42	14.53	13.32	12.6	14.73
0.471557	-1.08449	0.0348559	0.470928	1.66012	490.327	448.3	17.31	15.36	14.15	13.7	13.84	17.09	16.72	13.74	13.84	18.17	16.41	14.19	18.42	14.11	14.26	18.14	17.28	13.97	14	18.45	15.23	16.29	17.17	15.37	16.07	15.44	16.58	15.99	14.25	16.17	17.39	19.03	17.54	15.93	14.36	17.12	15.17	13.4	19.6	19.24	16.78	15.55	19.32
0.505674	-0.98372	0.159367	0.694957	1.66007	1086.66	396.4	19.6	18.12	16.22	16.16	16.19	16.15	18.21	19.84	19.96	15.96	16.32	16.26	19.78	19.82	16.38	19.28	19.34	20.02	18.9	20.66	18.23	16.45	19.69	16.29	20.4	18.97	17.86	17.07	16.46	19.37	19.39	19.58	20.08	15.89	17.82	18.67	18.31	20.09	20.95	19.36	16.25	18.79	19.24
0.456698	-1.13069	0.0451239	0.516235	1.65721	766.607	595.1	14.49	12.94	15.7	15.32	15.77	9.97	14.86	13.91	15.76	7.99	16.23	15.65	9.53	14.95	14.96	16.73	14.4	15.59	13.67	14.87	13.86	15.19	15.74	15.21	15.77	14.64	15.51	14.19	15.99	14.28	15.51	10.33	15.23	15.5	15.52	15.28	14.67	14.21	15.57	15.25	14.9	13.63	15.25
2.3122	1.20927	0.00924536	0.281891	1.65657	416.262	319.7	17.85	12.56	13.11	17.21	17.86	17.23	12.92	16.97	17.82	17.57	17.53	18.41	17.41	16.74	17.02	14.19	13.6	17.89	17.92	13.93	15.83	14.03	16.66	17.02	17.53	13.29	16.38	14.15	18.33	17.16	16.51	14.16	16.6	12.6	13.36	14.28	12.77	15.71	14.08	13.7	17.69	17.32	13.99
2.13223	1.09237	0.157644	0.694957	1.656	433.312	349.3	22.3	21.48	21.01	19.49	20.85	21.78	22.03	21.5	21.34	19.5	23.42	23.02	20.77	22.36	23.35	22.03	20.73	20.98	21.26	19.47	22.58	22.1	19.58	20.5	18.03	22.54	21.39	21.75	17.53	22.34	21.35	16.22	20.99	23.26	21.43	19.85	20.41	15.97	22.36	20.32	21.04	20.61	16.63
0.441312	-1.18013	0.0339575	0.470459	1.65515	690.752	44.8	18.41	18.27	14.04	19.25	13.65	18.3	18.06	19.19	18.92	13.25	17.83	17.45	14.28	18.31	17.98	17.88	14.43	18.51	17.73	19.82	18.2	21.16	17.66	17.29	17.98	17.73	18.02	20.07	14.11	18.02	18	18.16	17.43	19.88	21.09	19.57	19.86	19.04	19.71	20.28	19.6	16.84	17.99
1.73416	0.794237	0.0378601	0.485023	1.65259	498.827	42.8	17.16	17.47	17.16	19.04	17.73	17.49	17.21	18.12	16.78	17.87	17.06	17.61	17.19	19.16	18.32	14.92	18.52	17.07	17.48	18.67	17.79	14.66	16.99	17.41	17.25	18.24	18.35	18.15	16.67	16.71	17.59	14.67	17.2	18.06	18.29	14.94	14.69	18.68	17.64	16.23	13.71	16.03	14.76
0.627337	-0.672688	0.106357	0.612125	1.65132	610.28	458	16.34	16	16.63	16.48	14.91	15.24	14.24	16.33	17.05	15.1	14.05	13.56	16.33	17.06	13.73	16.05	17.22	17.31	16.59	17.71	16.39	15.62	16.31	13.8	16.69	16.08	16.13	15.74	13.6	16.34	16.47	16.83	16.38	14.92	16.04	15.59	17.37	17.16	16.38	16.98	16.11	16.3	14.41
0.651894	-0.61729	0.0788628	0.591445	1.65095	115.095	42.6	17.8	18.32	15.91	15.85	15.83	15.83	18.21	16.83	15.77	17.6	16.02	15.95	17.66	18.23	17.75	17.91	17.77	17.9	18.18	17.3	18.62	16.1	18.26	18.14	16.97	18.06	15.71	17.95	16.11	17.56	18.45	15.89	18.01	15.57	18.64	18.24	16.88	17.32	18.48	17.63	18.41	17.37	17.59
1.77427	0.827226	0.0309384	0.454877	1.64957	434.242	358.1	15.55	19	18.19	19.9	19.46	17.73	17.56	18.51	18.51	19.23	16.91	18.96	17.19	15.41	19	16.12	17.97	18.58	19.11	15.78	18.77	18.22	17.17	18.94	17.2	17.72	17.72	18.37	18.93	18.12	16.38	17.78	17.92	18.11	17.53	15.89	15.18	17.7	15.8	15.59	15.39	15.08	15.97
1.63089	0.705656	0.0431095	0.504184	1.64805	159.969	550.6	17.12	16.61	16.95	14.47	14.4	16.68	16.46	17.08	17.01	17.65	14.91	17.36	17.52	16.92	17.34	15.43	14.98	17.47	16.51	17.57	14.74	16.38	16.82	16.99	17.64	14.48	16.88	14.05	15.91	15.71	14.64	16.58	16.51	14.18	14.94	15.33	16.66	14.15	15.14	16.81	14.55	16.32	15.29
2.48571	1.31366	0.0349693	0.470928	1.64561	513.269	389.2	14.15	18.16	17.58	19.11	15.86	18.34	13.74	18.89	15.91	15.88	20.92	20.18	18.65	13.98	18.8	14.9	17.75	17.36	14.95	14.61	14	14.64	17.5	19.23	14.03	13.96	16.98	19.23	18.73	16.55	14.05	14.66	16.32	20.57	14.21	14.91	16.03	13.29	14.65	14.33	16.63	18.3	14.74
1.63205	0.706688	0.0598916	0.561654	1.64363	554.851	40.5	19.2	19.53	19.37	19.43	19.65	19.32	19.31	18.52	18.65	19.08	19.21	18.97	18.08	19.25	19.49	16.66	19.19	18.15	18.54	15.43	19.31	18.57	18.71	19.28	18.63	19.21	18.84	19.56	19.33	18.65	19.05	18.24	19.01	18.42	20.27	19.14	19.63	19.26	15.44	19.18	18.64	18.67	15.65
1.77859	0.830731	0.166514	0.694957	1.6409	280.263	478.6	17.85	17.08	17.2	16.71	16.8	16.21	17.75	17.01	16.59	19.97	16.18	17.84	20.04	18.27	18.54	17.52	13.38	14.94	15.93	19.05	16.98	17.56	17.1	15.99	16.68	17.2	15.41	17.25	15.81	17.78	15.2	17.65	16.76	15.95	15.81	17.94	16.13	20.29	14.61	17.17	18.19	17.22	16.72
1.8443	0.883075	0.0141357	0.344797	1.6375	406.279	327.7	15.91	16.89	14.16	17.58	16.74	17.08	17.4	17.3	18.06	13.41	16.81	14.22	17.64	16.48	17.45	15.03	14.55	13.99	15.1	14.72	17.7	16.21	16.8	15.41	16.96	14.06	17.13	16.5	14.27	13.41	17.36	17.09	17.07	13.57	14.39	15.01	17.12	16.54	14.77	14.46	13.87	16.16	17.56
1.41257	0.498323	0.217119	0.736547	1.63522	229.938	37.2	16.06	14.97	16.18	14.94	14.67	15.02	15.31	14.75	14.48	14.24	16.16	14.87	16.18	15.35	16.59	15.2	12.93	15.97	14.4	16.31	14.66	15.39	14.01	15.77	15.17	14.92	14.33	14.4	15.32	14.71	15.09	15.25	14.21	14.92	15.33	15.73	14.91	14.25	15.48	13.83	14.68	14.64	15.38
0.500067	-0.999806	0.0681814	0.574409	1.63478	1055.2	431.6	17.87	14.23	19.63	14.49	14.46	14.58	15.86	17.46	19.2	16.02	14.93	14.75	16.97	16.54	14.75	16.37	18.11	18.82	14.62	19.08	14.76	17.71	16.12	14.82	17.17	18.49	14.5	17.28	18.2	16.64	17.82	17.15	17.88	16.47	17.36	15.35	17.83	18.39	16.56	16.82	14.59	19.33	20.07
1.45947	0.545441	0.0418453	0.503315	1.63432	417.775	516.9	15.31	15.69	15.69	14.9	15.13	15.25	12.45	15.1	15.15	15.65	14.97	15.82	15.57	15.42	15.58	15.48	15.44	14.52	14.46	13.46	15.65	15.18	13.52	15.41	14.45	15.13	14.37	13.36	14	13.28	12.79	14.6	13.64	14.27	14.96	14.61	14.91	14.68	15.21	16.28	15.88	15.33	15.63
0.495851	-1.01202	0.057801	0.559298	1.62941	639.471	431.6	17.83	16.72	16.78	17.61	12.66	16.13	13.01	14.81	12.85	16.53	13.72	13.25	17.27	16.86	13.43	17.59	17.91	17.37	15.6	16.84	14.26	16.24	17.79	13.51	15.97	15.3	16.16	16.34	13.22	16.99	16.76	18.53	16.73	16.32	13.44	17.7	16.62	15.7	14.15	17.42	15.03	17.57	16.93
0.506142	-0.982387	0.0912062	0.603504	1.6242	1062.66	397.6	18.94	18.27	18.75	14.4	14.33	18.43	17.92	18.67	19.47	17.47	17.22	15.72	18.97	19.48	14.7	18.67	19.27	20.61	18.3	20.66	14.7	18.76	19.07	16.52	18.92	19.14	16.09	17.7	14.79	19.23	19.8	19.39	18.93	17.99	18.58	18.42	18.47	19.21	19	18.56	16.66	18.92	19.18
1.59262	0.671398	0.0775845	0.591445	1.62216	423.281	578.1	16.14	15.76	15.93	14.69	14.83	15.15	15.64	15.33	15.42	15.47	14.9	15.73	15.4	12.41	16.6	13.43	15.73	15.3	14.59	13.98	12.43	15.67	13.85	16.02	12.57	14.32	13.7	14.53	14.51	15.45	12.57	15.51	14.67	13.92	15.66	16.58	15.74	15.69	13.27	14.79	15.29	15.46	14.99
0.221675	-2.17348	0.109872	0.612862	1.61556	171.063	51.3	14.52	15.58	17.81	6.93	16.12	17.57	19.58	8.17	16.77	6.93	8.17	7.81	17.76	16.57	17.64	16.9	16.97	18.12	17.35	16.17	16.31	8.63	17.98	16.6	17.97	17	17.22	15.62	18.24	16.69	16.6	9.01	7.81	16.95	15.83	16.7	15.06	17.4	16.32	14.05	16.93	16.84	18.74
1.90451	0.929419	0.290824	0.789603	1.61441	823.787	41.8	18.12	16.7	17.75	19.95	18.45	17.05	17.9	18.15	17.85	17.97	17.8	16.46	17.08	16.64	19.01	13.87	12.3	16.57	17.78	17.92	19.09	17.24	13.09	17.73	18.07	17.44	15.23	16.73	15.02	15.17	17.59	18.15	17.32	16.69	18.21	18.15	16.98	17.33	14.97	18.63	17.56	16.21	19.35
0.48722	-1.03735	0.0347801	0.470928	1.61428	846.445	375.7	17.24	12.8	17.05	17.17	16.06	13.06	16.19	17.23	14.35	19.98	18.52	18.84	18.91	16.2	17.83	19.69	18.92	18.22	19.7	17.58	16.65	18.22	18.72	19.14	16.58	18.74	15.7	17.58	18.12	19	17.67	14.92	18.67	16.63	17.85	17.7	19.29	16.28	19.5	17.15	19.55	16.83	18.07
0.61627	-0.698366	0.202242	0.722593	1.6127	185.165	58.8	18.46	17.91	18.44	18.12	15.49	19.54	17.79	19.34	18.1	15.12	16.62	15.58	17.75	15.49	17.86	16.19	18.21	18.48	18.36	18.37	17.81	15.8	18.57	19.08	18.88	18.23	18.73	18.05	19.63	19.1	18.6	18.33	18.58	18.17	18.75	15.97	18.3	17.86	18.1	18.67	17.81	18.45	16.04
0.331731	-1.59191	0.146189	0.678639	1.61195	1015.68	411.2	15.75	21.07	15.66	15.59	15.58	21.54	20.2	21.88	15.52	20.25	15.78	20.5	22.15	20.59	15.75	21.57	15.88	23.23	20.86	22.75	15.76	15.89	21.54	21.16	21.36	20.62	19.08	16.41	15.85	21.39	22.15	22.07	21.35	20.09	15.92	20.65	21.2	21.56	20.98	20.98	20.75	21.46	21.41
0.541217	-0.88572	0.137231	0.664963	1.61123	904.66	580	15.08	15.9	17.44	12.64	12.55	16.23	14.18	16.96	17.1	16.14	13.62	13.17	16.19	16.56	15.63	17.02	17.48	12.93	12.96	17.34	14.22	16.12	16.47	16.27	16.95	16.03	16.32	16.37	13.16	16.62	17.26	17.4	16.47	15.08	14.74	16.48	16.64	16.27	17.09	16.7	17.07	16.91	15.97
2.07637	1.05406	0.0161129	0.367835	1.60978	599.247	360.4	15.77	19.56	18.67	18.29	19.76	17.44	15.36	19.36	18.66	20.04	19.83	18.6	17.37	15.64	18.89	19.09	18.52	18.75	15.59	15.98	15.78	15.92	19.47	19.09	15.66	15.51	20.48	20.24	18.54	16.34	15.59	15.74	18.36	15.33	15.95	16.07	18.44	15.32	15.97	15.78	15.62	19.79	16.14
1.75894	0.81471	0.0290775	0.448193	1.60812	364.231	292.8	18.11	17.35	14.87	18.18	18.11	16.92	14.53	15.75	18.32	18.26	16.39	17.57	17.02	14.83	18.13	15.65	15.22	14.78	17.58	15.32	17.59	15.3	17.71	17.28	14.89	14.72	18.16	18.2	15.13	17.49	14.88	15.18	14.81	14.47	15.15	15.49	17.15	17.53	16.8	15.09	17.58	17.53	15.5
1.87532	0.90714	0.0710971	0.574409	1.60717	163.132	287.5	19.27	17.6	20.34	20.68	19.74	16.69	20.44	19.52	20.2	19.89	20.19	19	20.48	21.1	20.53	19.79	16.87	20.11	19.86	18.64	20.75	19.38	16.47	19.43	20.88	16.58	20.59	20.27	19.89	20.23	20.44	19.48	19.7	19.32	17.04	19.99	16.55	19.49	19.74	16.78	16.79	16.52	18.82
0.49509	-1.01424	0.0525726	0.543369	1.60648	335.151	477.5	15.28	10.58	10.83	16.72	17.47	16	15.39	15.42	15.68	17.71	17.06	17.02	15.91	12.16	12.5	16.55	16.03	16.51	15.54	16.35	16.84	16.13	17.21	14.72	16.25	16.99	17.67	17.36	16.76	15.39	14.74	15.77	16.18	16.7	15.66	16.06	14.78	15.34	15.95	11.72	15.42	16.07	15.87
0.68688	-0.541871	0.0636046	0.567262	1.6051	656.341	482.4	16.47	14.99	15.4	16.12	14.94	16.8	15.43	14.02	17.29	15.87	14.28	13.87	16.22	15.72	15.71	17.18	16.03	15.29	16.11	16.38	16.03	16.54	15.98	16.59	16.66	15.63	15.28	13.34	16.39	14.99	15.56	16.96	16.44	16.08	16.5	15.91	16.96	16.48	16.49	15.89	16.78	14.29	16.67
2.91115	1.54159	0.00354508	0.163415	1.60257	424.252	294.6	11.85	17	11.4	17.3	17.66	17.69	16.32	17.24	17.09	16.72	17.93	12.52	17.79	11.77	17.76	12.79	12.12	11.38	16.89	12.56	16.79	12.68	17.37	17.33	11.88	11.97	17.58	17.02	15.79	17.08	11.95	12.9	17.35	11.49	11.74	12.99	17.05	17.41	12.62	12.37	16.26	16.69	16.5
2.89769	1.5349	0.073854	0.57658	1.60065	900.643	347.4	20.55	15.97	19.92	15.14	20.13	20.95	14.89	20.76	20.66	20.58	15.42	21.96	20.1	19.11	22.34	20.5	19.86	20.54	15.17	15.61	15.32	20.51	14.82	15.31	15.21	21.14	19.06	14.76	18.08	20.27	18.11	21.34	17.37	21.75	17.99	15.72	14.97	14.78	19.38	15.4	15.19	14.77	20.66
3.00372	1.58675	0.0142859	0.345696	1.60061	259.115	50.4	10.63	16.97	17.15	16.05	17.93	16.69	11.75	16.82	15.04	16.72	15.81	18.05	16.35	17.65	16.08	16.97	17.67	15.25	12.51	11.23	17.72	11.34	17.74	15.49	16.45	16.31	15.09	17.11	17.4	9.86	10.76	14.55	10.13	10.25	17.22	15.09	15.52	13.47	12.5	11.1	14.3	17.18	11.16
1.7766	0.829118	0.0866366	0.597972	1.60027	234.623	438.7	16.19	15.48	16.95	15.49	14.44	15.27	16.51	12.92	16.93	16.59	16.46	17.29	17.31	16	16.06	13.65	15.9	12.23	15.41	16.01	16.21	15.97	15.51	15.43	13.92	16.48	15.83	14.96	13.73	15.6	15.46	16	17.77	15.31	16.84	15.97	14.89	15.93	16.47	14.37	15.85	11.43	15.54
0.496865	-1.00908	0.292149	0.789764	1.59974	241.204	62.5	12.45	14.55	11.98	15.71	17.39	16.55	11.9	16.2	16.01	14.92	12.65	14.61	12.32	15	15.84	15.13	14.41	16.1	16.69	13.03	18.4	13.99	17.18	16.55	16.78	12.43	16.32	15.55	15.68	16.07	12.43	17.54	15.44	16.31	16.26	17.92	15.12	16.56	16.56	14.99	15.88	14.73	15.82
0.451822	-1.14617	0.0602364	0.561654	1.59833	141.978	367	16.91	17.82	12.88	17.22	16.81	17.51	17.63	12.28	12.51	17.64	13.44	18.62	16.58	12.99	13.14	17.63	17.79	16.96	16.92	17.46	17.21	14.58	15.75	17.64	15.64	17.77	17.34	17.81	12.92	17.91	17.84	17.86	17.16	12.39	16.81	14.11	17.62	17.17	13.92	18.19	17.54	17.6	17.14
2.64496	1.40325	0.118555	0.62865	1.5976	1206.64	43.1	18.86	18.34	18.91	18.61	18.27	19.17	18.05	17.25	17.9	18.11	13.67	19.66	13.41	19.45	19.15	14.25	18.65	12.99	18.06	13.99	18.58	14.08	12.21	17.95	16.24	19.62	12.92	11.95	17.23	13.48	18.6	17.53	16.34	16.87	19.84	14.33	16.57	19.04	18.75	17.02	19.08	17.29	17.81
1.65338	0.725419	0.0701315	0.574409	1.59695	632.216	398.1	16.3	17.28	18.33	17.12	16.68	18.11	17.09	18.7	18.52	16.61	18.02	17.46	16.24	17.66	17.9	16.45	15.12	14.71	17.75	15.23	17.11	16.94	18.47	18.12	17.55	16.24	17.4	17.13	17.1	14.2	14.79	18.11	18.6	17.17	17.46	17.31	14.49	14.29	17.58	17.04	17.16	16.28	15.44
1.8652	0.899333	0.254007	0.78046	1.59631	615.37	304.9	18.6	17.52	16.22	19.06	17.27	18.88	19.5	17.85	17.65	18.35	18.85	18.87	18.23	17.89	17.95	16.2	15.41	17.87	18.09	17.62	17.61	18.47	16.11	18.12	16.61	19.17	18.82	18.61	18.64	17.42	17.98	19.04	16.91	19.74	17.62	18.47	13.3	15.38	18.53	16.38	18.58	16.92	14.59
2.38175	1.25202	0.12361	0.64315	1.5939	136.926	37.4	18.3	18.02	12.62	18.1	16.62	15.69	17.61	17.45	17.14	17.59	17.26	17.15	15.71	12.81	15.02	16.07	13.24	15.13	14.73	13.57	12.94	16.07	11.86	16.31	12.94	16.8	13.47	14.95	17.28	16.94	16.96	16.31	17.89	16.47	12.9	17.76	17.23	11.81	17.32	13.32	12.24	17.9	18.03
1.67684	0.745742	0.0437157	0.504913	1.59201	334.221	318.7	17.16	16.82	13.7	16.8	16.78	16.54	17.8	16.42	14.86	16.1	17.45	16.75	18.35	16.82	17.07	16.25	14	15.92	16.33	14.32	17.89	14.42	17.05	17.17	16.61	13.7	17.67	16.29	16.26	16.64	16.81	14.43	16.72	14.13	17.09	14.67	16.54	16.56	14.45	16.68	16.74	15.37	14.45
3.93518	1.97643	0.128987	0.65452	1.59178	1103.19	299.4	16.81	10.05	10.38	14.71	16.38	16.19	17.84	10.09	16.56	16.5	14.39	19.83	16.66	18.45	17.5	17.92	10.83	16.04	11.29	11.52	10.99	17.55	9.82	14.75	16.37	16.92	18.68	16.35	17.25	10.05	10.92	17.12	10.25	10.43	15.28	17.56	10.28	16.61	11.34	11.17	10	9.47	18.67
1.60278	0.680581	0.392409	0.823169	1.59175	292.666	462.3	19.46	19.17	19.76	18.6	19	19.06	19.23	16.64	18.85	19.61	18.42	19.65	16.85	19.19	19.98	17.18	16.84	16.58	18.87	17.82	19.73	19.69	18.33	16.8	19.1	19.37	18.22	18.54	19.15	16.39	16.65	18.43	16.62	18.52	19.46	19.31	16.51	16.45	18.92	19.04	19.56	19.04	19.07
1.6656	0.736043	0.0966501	0.61062	1.5909	265.118	56.9	20.41	17.75	18.55	20.03	18.42	20.35	19.3	19.94	19.94	19.84	21.34	18.71	18.04	18.5	20.29	18.4	17.54	16.97	20.21	16.38	19.46	18.71	17.36	16.2	19.84	17.96	19.89	15.77	19.92	17.68	19.31	19.25	18.92	19.52	18.44	18.5	18.13	19.8	19.35	21.27	19.92	18.95	18.91
0.655402	-0.609548	0.125114	0.645366	1.59023	386.328	360.1	19.02	18.29	17.9	17.97	15.89	19.34	18.67	19.15	18.47	17.69	16.07	18.64	17.74	17.02	17.15	16.56	18.12	18.49	18.54	17.94	17.76	17.51	17.82	18.1	18.29	18.06	20.13	18.33	16.17	18.53	18.95	19.43	18.23	19.45	18.33	17.41	20.35	19.79	19.52	18.61	18.93	18.07	19.6
0.666664	-0.584968	0.224288	0.746567	1.5879	170.246	417.2	17.46	17.1	19.41	18.51	16.98	18.43	18.89	19.64	18.28	17.21	16.47	15.43	18.29	18.47	15.47	18.92	18.18	19.07	19.38	18.4	16.61	18.63	18.65	18.91	18.5	16.93	18.25	19.35	17.77	18.5	18.76	18.69	18.17	17.14	16.66	19.2	17.97	18.45	18.12	18.41	17.17	18.84	18.81
1.54185	0.624667	0.0515351	0.539833	1.58738	639.945	519.5	15.41	15.51	15.97	13.6	14.14	13.93	15.38	14.88	14.49	15.41	14.61	15.45	14.25	14.89	15.65	13.69	14.55	13.6	13.78	12.49	14.47	14.76	14.21	15.71	14.54	13.99	12.87	13.4	13.78	15.1	14.7	15.58	15.03	15.03	11.71	16.33	15.47	14.73	12.53	14.71	14.13	14.5	16.51
1.67764	0.74643	0.0730291	0.574409	1.58738	346.222	308.4	17.88	18.33	17.47	18.34	16.76	18.53	17.94	16.81	17.61	17.28	17.63	14.98	17.58	19.28	17.57	15.65	15.21	18.09	18.65	18.48	16.73	15.29	14.42	16.6	17.75	14.72	17.55	18.37	17.02	16.47	18.27	15.17	17.71	17.17	17.47	15.49	15.66	17.93	17.76	17.71	17.82	18.18	15.49
1.88432	0.914043	0.0226184	0.428344	1.58704	635.127	484.5	13.27	15.67	15.62	17.67	16.38	16.15	12.77	16.23	16.19	15.94	16.94	16.64	15.87	12.96	17.58	14.02	17.12	16.64	14.72	13.78	13.12	13.85	16.27	16.9	13.17	13.1	13.59	16.85	17.09	15.64	13.08	14.03	14.15	16.26	13.14	14.1	13.43	16.02	13.9	13.52	17.11	16.45	13.8
0.55548	-0.848194	0.226462	0.749052	1.58523	466.35	347.8	13.73	16.27	17.58	15.85	15.54	16.3	13.22	16.96	15.58	15.4	14.75	13.49	16.49	16.45	13.63	14.48	15.84	15.48	15.53	16.8	16.42	14.33	17.01	15.37	13.6	17.46	17.78	17.9	15.64	17.9	17.51	14.36	17.46	18.13	13.76	14.56	15.43	16.21	18.22	16.79	17.61	15.4	17.88
3.56721	1.8348	0.138052	0.664963	1.58447	161.128	39.9	15.27	11.04	14.26	17.5	17.43	18.7	18.9	9.97	17.27	14.52	15.21	15.78	16.48	10.35	17.25	16.92	17.95	14.45	10.25	11.01	15.93	15.11	9.53	10.78	14.04	15.87	14.73	18.65	15.84	15.58	10.63	15.89	18.61	11.53	10.32	11.45	15.7	9.47	11.08	10.92	9.82	11.16	11.04
0.530735	-0.913935	0.0426506	0.504184	1.58437	985.777	41.2	18.96	18.65	14.82	14.65	14.65	19.05	17.65	17.29	14.65	14.23	19.04	17.94	17.98	17.59	20.07	18.57	15.13	18.94	18.44	18.8	17.74	20.63	18.72	18.51	18.64	19.42	17.53	17.7	15.04	17.51	17.64	18.64	17.82	16.54	19.35	17.77	17.72	17.86	18.06	18.75	19.57	18.44	17.61
0.547424	-0.869269	0.10757	0.612125	1.58296	202.029	224.7	17.89	13.27	13.89	17.98	13.46	17.28	15.36	17.59	17.04	17.34	15.52	17.85	15.64	16.4	13.98	16.69	14.23	17.72	17.34	17.77	18.29	17.39	17.82	16.93	17.32	17.58	17.31	17.5	15.09	17.58	17.42	14.57	16.08	16.87	14.08	16.72	17.66	17.76	17.63	15.36	17.76	17.86	17.66
1.87468	0.906645	0.0626553	0.567262	1.5823	506.193	408.6	17.08	16.39	17.51	18.37	15.71	16.28	16.41	16.25	16.8	16.57	16.55	15.58	16.37	16.43	17.54	13.82	16.42	16.22	12.5	16.74	15.76	13.66	15.93	16.32	12.96	17.76	16.63	15.46	16.44	17.74	12.91	16.89	16.63	15.86	12.91	14.72	16.48	18.3	13.73	18.45	16.13	15.06	13.57
1.60829	0.685527	0.178325	0.703149	1.58053	489.27	346.7	18.45	16.98	17.26	16.22	17.57	18.21	17.69	17.8	17.22	16.66	18.5	18.62	17.1	18.63	19.06	17.77	16.63	16.97	17.36	15.97	18.58	17.87	15.42	16.22	15.43	17.63	18.07	17.38	15.14	18.9	16.59	17.46	17.73	18.84	17.24	17.73	16.02	13.17	18.29	16.77	16.74	16.97	18.21
0.652118	-0.616796	0.0272513	0.448193	1.57983	1510	418	20.01	19.98	17.23	21.01	19.78	20.51	20	17.2	17.14	20.42	19.1	19.07	20.14	20.61	18.49	20.55	17.32	20.38	20.09	20.42	19.42	20.09	20.77	20.4	20.92	19.57	20.23	20.06	20.44	20.41	20.17	20.37	20.45	19.57	19.06	19.16	20.32	20.26	20.36	20.41	20.33	20.43	20.06
0.436328	-1.19652	0.0830539	0.59444	1.57914	475.518	35.6	17.28	12.13	12.54	14.51	11.88	12.27	15.15	17.97	15.49	11.74	15.83	12.55	18.07	15.89	13.87	15.86	13.17	12.39	14.76	17.96	18.13	17.8	14.62	17.77	16.68	16.1	14.57	11.29	12.62	17.3	16.22	16.84	15.91	16.41	15.15	16.94	17.25	16.99	16.15	16.01	13.09	16.39	16.23
0.603452	-0.728688	0.0248522	0.448193	1.57832	372.997	62.4	16.81	13.12	13.73	15.73	15.93	13.39	16.57	17.1	13.39	15.22	14.12	16.63	13.9	16.7	15.82	15.98	16.67	13.5	16.11	16.94	16.08	17.35	15.9	16.35	16.07	16.71	16.84	15.98	15.69	15.01	16.68	15.09	13.32	13.01	16.55	17.06	15.84	15.61	16.78	15.13	16.52	15.95	16.21
0.467087	-1.09824	0.0268237	0.448193	1.57673	1109.66	519.4	16.37	14.36	15.86	11.19	15.9	11.45	15.1	11.38	16.71	14.98	12.41	12.76	12.1	15.3	14.65	15.83	12.31	11.53	16.2	16.63	15.37	12.83	15.34	16.9	16.28	14.96	17.24	14.65	15.6	15.48	17	15.94	16.31	15.56	15.11	15.87	16.37	10.88	15.17	16.1	15.18	12.32	17.09
1.39583	0.481118	0.0688781	0.574409	1.57645	770.431	519.3	16.54	16.13	15.8	16.27	16.66	16.03	16.06	15.61	15.97	14.42	16.15	15.93	15.99	16.29	17.12	16.12	15	15.94	16.29	14.37	13.78	16.79	15.59	15.93	13.73	15.64	15.92	15.53	16.15	14.82	16.28	16.03	15.57	15.1	13.91	16.78	16.15	15.35	17.08	15.9	16.06	15.19	16.1
0.42872	-1.22189	0.165905	0.694957	1.57558	413.25	218.5	16.89	17.11	12.36	17.36	17.04	16.36	12.33	17.41	18.04	11.53	15.08	12.47	12.76	17.86	12.67	16.81	13.02	12.28	17.11	17.15	16.43	17.51	16.43	16.99	15.9	12.77	17.03	12.37	17.58	17.66	17.98	17.46	17.33	16.88	17.73	17.97	17.48	15.49	16.86	17.98	17.61	17.54	16.47
0.537375	-0.896	0.0280094	0.448193	1.57375	800.681	47	18.4	18.71	16.82	14.5	14.46	14.58	16.55	14.41	18.09	19.82	16.45	14.76	17.48	17.75	17.18	17.92	15.01	19.69	18.94	18.68	17.74	20.04	18.17	17.84	17.32	17.11	18.41	17.15	14.87	18.94	17.52	18.6	16.07	16.99	17.24	16.13	16.36	18.1	17.84	16.92	18.97	16.47	17.13
1.91105	0.934366	0.117733	0.627567	1.57341	302.745	48.2	17.38	18.15	18.61	16.59	18.96	16.81	18.38	16.98	16.48	17.01	18.55	17.86	18.31	17.94	16.67	13.79	17.14	17.19	17.5	18.49	17.08	17.93	17.31	17.02	17.85	17.01	17.23	11.33	17.65	16.69	17.07	19.27	16.71	18.61	13.86	18.02	12.27	15.28	17.02	15.24	17.57	17.32	17.39
3.0615	1.61424	0.166748	0.694957	1.57295	1388.67	294.5	12.7	16.23	17.65	18.16	17.97	17.24	17.21	11.78	17.28	17.14	17.53	12.25	17.31	18.22	16	20.09	12.87	18.02	12.09	18.45	18.92	13.3	11.6	12.67	17.38	18.79	12.18	10.92	12.34	16.38	18.04	13.52	11.74	11.92	12.51	17.95	13.79	14.45	13.34	19.1	11.97	15.58	13.2
0.51573	-0.955312	0.072657	0.574409	1.57154	622.541	48.5	18.26	17.75	16.34	16.49	19.78	14.84	17.09	17.09	17.95	17.86	16.88	13.91	14.2	19.4	17.39	20.35	18.32	16.8	18.38	18.16	18.14	18.04	18.16	17.3	16.87	17.76	19.34	17.48	13.96	17.98	18.59	18.48	18	19.69	20.11	18.37	18.08	19.14	19.37	19.04	13.59	16.65	16.12
0.587984	-0.766151	0.191055	0.707381	1.57113	512.361	456.5	18.37	19.15	19.98	19.49	18.97	20.32	18.71	16.43	20.76	18.96	18.66	16.59	16.67	20.6	17.73	20.35	20.98	20.64	19.13	20.58	19	18.92	19.58	19.35	20.18	19.19	19.74	19.29	16.77	19.74	19.74	20.5	19.98	16.23	18.68	19.3	20.95	20.74	19.09	20.04	19.32	20.23	20.95
0.561716	-0.832086	0.0592182	0.561654	1.56973	350.256	519.1	12.74	12.38	14.14	10.9	13.13	13.78	13.61	10.76	15.46	12.64	12.02	13.94	11.68	13.91	14.14	15.43	14.4	11.17	12.92	14.95	14.61	16.4	12.97	13.47	12.83	15.09	15.38	12.63	13.66	14.43	15.72	14.83	12.33	15.39	13.63	12.77	13.45	13.83	14.34	15.18	11.04	13.99	12.16
2.01487	1.01069	0.17261	0.701834	1.56783	468.22	350.4	18.22	18.51	18.35	17.46	18.89	14.51	18.18	18.44	16.82	18.3	20.41	18.94	17.84	17.75	20.1	17.68	18.02	17.93	18.33	15.11	14.73	17.62	14.11	18	15.75	19.82	18.81	14.02	17.01	19.2	17.03	19.99	18.26	14.13	18.07	16.09	17.49	14.13	19.2	16.01	19.02	16.48	15.28
0.62139	-0.68643	0.0292288	0.448193	1.56605	146.98	586.9	24.08	23.21	22.9	21.63	21.73	23.94	24.34	21.31	21.23	21.52	24.29	21.57	23.04	21.51	25.86	22.7	21.52	23.42	23.56	23.77	25.13	22.99	23.66	21.58	23.87	23.14	23.02	23.48	21.72	23.94	23.77	21.24	23.66	24.43	23.9	24.11	23.62	24.11	24.04	24.18	24.96	23.62	24.58
1.59554	0.674043	0.049044	0.532153	1.56352	1234.73	39.7	18.21	16.83	18.21	18.37	18.17	18.53	18.19	18.73	18.15	17.62	18.04	18.88	15.04	17.29	18.32	15.55	15.1	18.75	17.4	16.75	19.34	17.13	17.74	17.64	17.54	18.43	17.41	17.24	16.04	16.6	16.25	17.07	18.29	18.32	18.45	17.37	18.28	18.04	17.57	18.15	14.71	17.59	17.12
0.575395	-0.797376	0.0389483	0.493328	1.56336	129.066	48.3	16.75	19.87	17.59	15.89	14.38	13.83	19.49	18.3	18.66	17.4	17.69	16.27	16.76	17.83	14.91	18.18	18.28	17.16	18.42	18.2	17.15	16.51	16.14	18.68	19.74	18.11	17.88	17.15	19.78	18.8	17.66	18.22	17.72	18.64	18.57	17.28	17.45	15.69	19.43	17.98	17.64	17.8	18.84
0.184133	-2.44118	0.0702961	0.574409	1.56287	830.805	42.6	18.45	18.08	18.6	7.37	16.96	16.3	17.77	7.81	18.18	16.89	18.69	8.31	8.05	7.52	18.57	18.49	18.48	19.24	7.81	18.98	18.67	18.9	17.89	19.03	8.52	18.6	17.34	18.84	15.71	18.28	17.79	18.94	17.64	18.02	18.86	19.03	17.64	19.04	18.66	15.31	7.52	18.72	9.53
0.617778	-0.694839	0.190291	0.707381	1.56152	658.838	42.2	17.62	15.07	16.52	16.69	18.05	18.41	16.82	17.44	17.15	17.88	19.02	17.5	14.63	17.15	17.45	19.31	17.36	16.38	19.17	14.93	18.72	18.6	19.07	16.69	17.76	19.58	17.66	18.77	18.05	19.13	18.3	17.13	18.54	16.54	16.22	16.85	16.75	18.72	15.81	17.27	18.47	17.81	18.48
0.663264	-0.592344	0.325991	0.794027	1.56074	1045.15	424.9	17.33	18.53	20.76	18.77	18.08	20	18.96	19.71	19.87	18.45	17.53	18.07	19.81	19.76	16.03	19.02	19.84	20.4	18.27	20.39	19.06	18.86	20.17	19.11	19.81	19.4	18.18	18.69	18.15	19.64	20.42	19.96	19.56	18.48	17.19	19.04	19.59	20.21	19.52	19.47	18.06	20.15	20.02
0.507199	-0.979376	0.0899292	0.603355	1.56022	1026.66	409.4	19.97	19.57	16.01	19.43	15.94	20.18	19.81	20.06	15.9	15.68	19.01	17.06	20.02	20.49	16.11	19.76	20.43	20.79	19.76	20.21	19.55	19.34	19.72	18.8	20.26	20.09	19.36	18.99	16.22	19.63	20.62	20.34	19.46	18.95	17.51	20.02	20.2	15.68	19.91	20.16	15.99	19.87	20.81
0.508782	-0.974882	0.0145133	0.348006	1.55991	273.956	38.5	17.51	18.03	13.16	16.58	12.56	12.81	16.9	12.57	15.06	17.14	18.15	14.24	18.4	16.67	18.55	18.12	13.63	16.68	17.59	18.37	17.24	17.52	16.23	17.82	16.7	16.25	18.42	16.47	15.58	16.86	17.22	17.42	16.07	16.15	17.48	18.43	18.07	17.09	17.67	16.89	14.87	17.24	17.35
1.67561	0.744688	0.100137	0.61062	1.55952	184.003	35.7	15.33	14.03	15.78	15.74	14.97	15.5	15.35	16.92	16.18	16.34	15.56	17.53	14.58	16.76	16.96	15.39	15.39	14.83	15.89	17.97	15.53	13.88	13.78	14.73	13.22	15	14.45	12.98	14.15	15.04	15.96	15.72	13.8	17.22	13.18	14.13	16.09	16.73	13.94	15.26	14.16	13.31	15.19
0.680814	-0.554667	0.0614437	0.564845	1.55845	768.769	43	18.95	18.07	18.46	16.3	19.21	16.28	17.89	18.4	16.28	16.12	16.44	16.4	17.79	17.33	19.11	18.09	18.26	18.19	16.29	18.76	18	18.51	18.26	18.54	17.42	17.81	18.77	19.77	16.59	18.02	18.75	18.15	18.65	17.35	18.76	18.31	18.48	18.12	17.94	18.24	16.36	18.03	18.57
0.508547	-0.975548	0.215178	0.73469	1.55776	224.099	327.5	15.95	13.92	15.41	11.63	15.79	17.4	14.45	16.88	15.25	16.62	16.21	17.23	18.24	16.33	17.61	17.84	17.95	15.72	18.45	17.37	18.09	17.82	16.48	18.81	17.61	16.19	17.39	16.94	16.82	15.88	16.14	15.85	14.88	16.94	19.48	16.33	18.89	18.95	18.29	16.46	13.25	12.72	18.94
1.76367	0.818581	0.0986999	0.61062	1.55538	529.412	403.8	17.29	16.52	17.91	18.14	16.59	17.51	16.01	18.07	13.49	17.04	14.19	17.82	17.38	17.1	17.78	15.52	16.01	16.58	18.06	16.77	15.62	15.91	15.76	13.95	16.54	17.75	16.06	15.71	15.55	16.8	17.81	14.51	16.11	13.14	18.62	14.79	13.28	15.76	17.83	15.81	15.32	16.48	17.55
0.696499	-0.521806	0.225137	0.746945	1.55446	273.626	383.6	15.74	16.12	17.46	15.42	15.7	16.27	16.81	17.5	18.29	16.65	15.12	17.05	17.46	16.41	13.91	15.52	18.26	17.75	16.81	17.46	16.54	16.72	17.44	16.71	17.15	17.2	16.37	16.38	16.43	17.14	16.66	16.63	16.38	15.53	16.95	17.42	17.49	16.78	16.69	16.18	15.86	18.24	17.55
2.17963	1.12409	0.123901	0.643569	1.55426	359.261	305.5	17.97	17.86	17.37	18.07	15.45	15.36	18.42	17.81	15.62	17.77	16.61	17.72	17.89	17.32	17.46	11.62	10.96	18.71	18.55	17.11	16.67	11.64	13.76	15.04	16.21	17.15	16.57	16.19	15.9	16.88	16.91	18.49	16.53	18.41	16.78	13.06	14.94	18.5	16.41	14.04	18.25	16.91	18.5
2.47687	1.30852	0.0280499	0.448193	1.55012	321.24	458	11.31	15.15	16.36	11.62	15.97	15.8	15.5	16.95	18.28	18.87	15.91	16.62	18.88	15.94	15.25	15.9	11.51	16.56	15.97	12.13	11.53	16.16	16.94	13.86	11.43	15.41	15.88	16.14	17.46	16.65	16.63	16.21	15.72	16	11.31	12.54	10.88	16.44	12.09	11.92	14.41	18.19	11.93
0.489929	-1.02935	0.0799191	0.591445	1.54699	615.459	578.5	19.03	17.07	13.81	15.61	13.32	13.48	14.44	18.33	13.48	12.99	14.18	18.27	14	17.37	17.57	17.15	17.01	17.6	13.59	15.65	13.84	18.15	16.65	16.33	18.71	16.8	16.26	16.78	16.62	16.99	17.84	16	17.63	13.14	17.28	16.56	16.77	13.02	18.76	17.24	16.96	16.49	18.09
0.477691	-1.06585	0.110552	0.612862	1.54621	289.157	454.8	16.25	15.57	12.72	16.3	15.17	16.99	16.72	17.21	12.38	11.88	14.72	14.03	17.59	17.13	13.02	16.74	13.32	18.22	15.19	18.15	14.64	15.78	17.5	13.17	16.98	16.1	16.65	16.27	13.81	16.75	17.15	17.39	18.25	16.3	15.79	15.47	12.44	17.16	17.17	17.99	14.83	17.88	18.77
2.12329	1.0863	0.0730242	0.574409	1.5448	100.028	297	17.66	17.09	18.06	17.14	13.49	17.66	17.89	13.47	17.16	17.88	14.28	15.94	17.4	16.84	18.17	14.82	14.28	17.44	17.18	17.87	18.74	14.57	17.46	17.99	18.07	14.72	18.12	16.86	16.66	13.05	13.96	14.58	17.27	13.24	14.11	14.84	13.38	13.14	15.99	15.43	13.55	13.01	18.35
0.517147	-0.951355	0.0985779	0.61062	1.54208	1487.51	417.3	19.22	19.09	16.11	20.71	19.48	21.55	19.18	15.93	16.04	19.55	19.57	19.67	21.16	20.4	16.26	20.6	16.29	22.05	20.16	20.93	18.6	18.79	21	20.12	20.84	19.23	19.94	19.41	20.31	20.95	20.93	21.66	20.59	18.35	17.38	18.35	19.83	21.26	19.98	19.96	19.42	21.06	20.93
0.683265	-0.549484	0.153612	0.690799	1.54127	1030.63	416.7	19.08	18.73	15.56	19.08	18.18	19.16	18.59	19.01	19.13	18.75	18.93	17.91	19.82	19.37	16.74	18.94	19.74	20.08	19.25	20.33	18.65	19.02	19.67	18.83	19.45	18.9	19	18.2	18.55	19.09	19.23	19.67	19.49	18.32	18.48	18.5	18.92	19.4	19.36	19.06	18.81	19.84	20.49
0.423045	-1.24112	0.0209419	0.414296	1.53944	596.854	47.6	18.04	16.77	12.16	16.93	11.55	11.95	17.55	16.78	15.66	16.31	19.35	12.27	12.49	17.21	17.56	17.8	12.88	17	12.1	17.49	17.2	17.83	16.96	17.28	17.08	17.55	17.59	17.07	16.99	17.15	18.2	16.34	17.54	17.8	17.65	14.39	16.84	17.38	16.76	18.6	19.19	16.74	13.2
2.04452	1.03176	0.0546166	0.55007	1.53894	192.094	36.3	13.91	14.42	10.41	13.39	14.25	13.68	10.43	12.55	10.09	12.71	14.57	16.59	14.23	14.03	13.41	11.51	10.88	14.55	12.36	15.11	11.04	11.51	13.22	11.04	10.86	11.04	13.08	8.31	13.67	15.39	14.51	14.59	10.32	13.18	10.76	11.75	13.65	13.98	11.36	11.19	12.98	10.54	11.31
1.75097	0.808151	0.167182	0.694957	1.53857	277.629	414.5	18.23	17.73	17.07	19.01	18.42	15.2	18.87	19.18	19.13	16.07	15.45	17.37	18.2	18.15	18.81	15.94	16.62	18.69	17.83	15.64	16.96	18.13	14.86	18.85	17.45	17.87	17.69	17.83	18.16	14.75	15.23	15.44	18.67	15.97	18.12	15.75	18.69	17.48	15.63	15.43	17.46	18.62	15.84
0.571659	-0.806774	0.0942225	0.61062	1.53503	1514.97	417.6	19.05	18.44	16.17	19.68	16.14	16.11	19.03	20.58	19.98	19.69	18.62	17.26	20.4	20.02	16.33	19.68	16.37	20.52	19.13	20.28	18.56	19.3	19.93	20.26	20.27	20.32	18.95	19.08	16.4	19.92	20.16	20.21	20.12	18.7	18.09	18.72	19.6	20.07	19.62	19.64	17.9	20.28	20.18
1.78456	0.83557	0.00811859	0.26212	1.53425	143.06	54	14.02	18.21	16.44	14.95	15.06	16.37	13.3	14.28	15.32	14.74	16.17	16.95	15.98	14.41	14.99	15.45	16.69	12.06	16.84	13.18	14.09	14.55	15.8	12.63	14.49	12.52	14.81	16.84	14.3	15.83	14.47	15.79	15.44	11.86	14.51	14.75	14.23	16.69	15.25	14.74	14.38	12.28	16.81
1.70037	0.765849	0.1151	0.622232	1.53354	672.867	44.2	19.33	19.17	17.2	19.16	17.12	18.75	20.42	18.66	19.71	16.52	17.48	16.65	17.66	18.05	16.09	15.67	16.83	17.59	14.85	19.98	18.15	17.21	18.49	16.95	19.38	18.89	18.41	16.96	18.46	16.8	18.51	15.19	17.8	17.71	18.62	17.5	15.79	16.8	17.08	18	14.85	18.29	15.52
1.90162	0.927226	0.248144	0.774402	1.53135	127.979	365.3	17.48	16.81	17.4	17	16.59	15.79	18	17.22	16.56	16.46	17.13	17.41	16.44	15.14	16.78	13.82	13.25	16.28	16.43	16.91	18.04	15.07	16.52	17.21	16.65	16.92	15.76	15.7	17.11	12.01	16.83	13.9	12.18	17.47	17.59	17.2	18.06	12.91	17.65	15.08	17.22	17.51	13.56
0.672854	-0.571634	0.0237515	0.438898	1.53107	912.774	42.7	19.7	19.25	17.29	17.31	17.35	17.27	19.49	17.26	19.76	19.62	19.09	19.4	17.36	19.09	20.05	21.01	17.37	18.38	17.29	18.3	19.77	19.33	19.38	19.27	19.31	19.64	19.64	20.02	17.56	19.03	19.09	19.94	19.95	19.47	20.04	20.06	18.95	19.08	19.38	19.81	19.75	19.32	19.05
0.574966	-0.798452	0.179482	0.703149	1.53019	469.801	582.7	16.27	15.76	18.53	15.86	15.08	16.5	16.4	17.03	17.1	17.15	13.17	12.64	16.72	17.69	12.87	15.87	17.8	17.6	15.14	18.31	15.22	16.6	17.24	16.24	17.05	15.68	15.68	15.66	16.02	16.59	18.13	17.88	15.64	16.18	13.89	16.18	17	17.32	17.68	17.74	15.98	17.14	18.33
0.612104	-0.708151	0.0665017	0.574409	1.52908	1150.76	41.3	17.39	19.5	15.73	17.57	18.08	15.65	18.39	17.64	15.57	15.32	16.74	15.75	15.92	18.07	18.84	18.6	15.93	15.61	15.61	18.07	19.01	17.86	17.69	19.06	18.7	16.66	18.94	16.97	17.64	18.29	16.87	19.18	18.87	18.07	19.19	18.39	18.15	18.21	18.56	18.08	15.66	18.3	17.14
0.388869	-1.36265	0.126179	0.645366	1.52621	1291.81	413.6	18.14	16.33	13.2	12.67	16.77	17.75	18.74	18.98	18.92	17.22	13.69	13.19	13.43	17.54	13.4	14.25	19.13	19.13	12.99	18.9	19.05	18.58	18.69	18.16	17.99	18.56	12.93	18.29	18.33	12.51	18.14	19.19	17.36	18.43	13.42	18.1	18.99	19.11	18.01	17.15	13.93	18.89	19.23
1.57064	0.651355	0.191668	0.707381	1.52521	402.247	315.7	17.61	17.62	14.76	17.51	17.42	17.37	16.71	16.89	16.84	17.66	18.22	18.2	16.7	14.69	16.53	15.5	17.81	17.45	17.79	16.93	15.92	15.17	14.18	16.55	14.75	18.15	16.96	17.31	17.75	14.12	14.73	15.12	16.26	16.45	16.93	15.39	15.59	17.02	15.22	16.97	16.93	16.54	15.39
0.516962	-0.951871	0.0882304	0.603355	1.52498	257.226	313.4	13.09	17.06	18.14	12.17	18.32	15.46	16.84	17.63	17.84	17.44	16.95	17.78	17.06	16.9	13.8	16.83	17.79	12.43	16.1	18.19	17.15	16.65	17.82	15.97	19.48	16.05	18.13	17.12	18.48	18.9	16.97	16.65	17.96	17.23	20.05	18.05	18.63	15	16.86	17.92	18.28	17.27	19.43
0.676091	-0.56471	0.00966918	0.289033	1.52491	412.851	44.3	17.9	18.38	18.04	18.31	18.2	16.03	19.03	17.39	18.34	18.2	17.47	17.21	15.28	18.65	18.18	19.63	18.5	16.61	16.58	18.37	18.97	19.4	17.39	17.44	19.03	19.41	17.68	18.88	16.97	17.58	18.29	19.28	18.54	18.25	19.65	19.77	18.99	18.41	18.24	19.11	17.74	17.5	19.09
0.641091	-0.641398	0.235149	0.753912	1.52289	558.205	372	15.58	15.41	17.28	15.86	15.51	16.68	16.92	17.59	17.36	17.05	13.34	16.32	16.94	16.87	13.04	16.89	17.2	17.51	15.62	17.81	17.15	15.76	17.32	16.76	17.31	16.54	15.95	15.83	15.93	17.21	17.86	16.82	16.06	16.12	14.02	16.58	17.65	17.27	16.16	16.75	15.35	17.03	17.65
0.267712	-1.90125	0.0327515	0.462312	1.5228	194.009	456.2	16.36	16.29	9.47	9.35	16.88	9.53	9.42	9.28	14.92	17.47	11.13	17.42	16.73	9.59	17.63	15.79	9.59	9.01	19.79	16.18	16.15	17.06	16.09	19.36	17.51	14.34	16.69	16.66	17.03	16.32	16.17	10.83	9.65	15.72	16.5	17.55	16.5	17.53	16.35	18.27	16.54	15.9	14.22
0.681434	-0.553355	0.230358	0.751123	1.52278	303.154	453.4	17.47	17.81	19.1	17.43	17.64	18.4	17.59	18.48	19.26	18.3	17.74	18.3	18.45	19.47	13.6	17.67	19.54	19.41	17.27	19.61	17.73	18.04	18.11	17.96	18.79	18.23	18.1	17.8	17.93	18.27	18.68	18.53	18.65	18.28	17.83	17.98	19.6	19.34	18.13	18.98	18.14	18.81	19.63
0.696198	-0.52243	0.136226	0.664567	1.52249	307.883	37.1	15.92	14.72	14.39	14.23	14.86	14.7	14.55	14.35	12.29	13.89	15.22	14.64	14.93	14.49	15.44	16.23	15.96	15.36	11.52	16.12	15.15	14.78	15.55	15.49	14.54	15.08	15.55	15.19	15.08	14.91	14.89	15.11	13.66	13.96	15.49	15.45	15.34	16.12	16.37	14.86	14.22	15.02	15.96
1.84951	0.88714	0.255972	0.78046	1.52247	351.055	369.5	14.9	18.33	17.71	17.55	17.45	15.32	17.25	16.56	12.54	17.9	18.2	17.8	17.26	17.77	17.58	14.04	17.47	16.3	17.14	17.32	15.94	17.5	15.39	13.29	16.06	16.11	17.75	14.27	16.91	16.86	13.99	14.05	14.68	16.66	17.05	18.04	16.9	17.01	13.95	13.56	17.04	16.96	13.84
2.08189	1.05789	0.159423	0.694957	1.52215	190.957	583.1	16.96	14.48	16.53	15.78	14.32	15.37	11.71	15.16	11.52	15.22	15.54	16.08	16.03	14.31	15.46	15.36	12.48	11.78	14.39	15.75	16.86	13.01	11.29	14.56	12.27	15.82	11.75	10.58	16.89	12.93	14.5	15.79	16.33	16.48	12.17	13.27	11.62	14.46	12.96	12.64	13.86	10.94	15.81
0.494898	-1.0148	0.205752	0.722593	1.52132	262.118	371.7	11.91	13.52	14.55	12.45	12.54	14.96	16.81	13.75	16.16	10.71	12.3	17.14	15.05	14.41	13.76	15.67	15.67	15.31	16.28	15.66	14.22	12.73	15.68	14.84	16.98	15.46	16.14	14.75	16.31	12.64	17.25	14.85	17.44	13.25	11.75	16.44	12.25	14.94	12.65	15.15	11.31	14.72	16.41
0.589643	-0.762086	0.083759	0.595294	1.5186	400.739	47.2	17.98	16.74	14.25	18.8	17.79	18.85	17.79	18.22	17	19.02	15.43	15.41	14.48	20.22	18.95	18.84	18.56	18.25	19.06	20.33	17.98	17.84	18.43	18.68	17.95	17.56	18.01	18.58	14.38	19.06	18.07	18.87	18.49	17.26	18.64	17.84	18.15	17.08	17.96	18.17	19.8	17.82	17.2
0.601342	-0.733742	0.11371	0.61785	1.51466	1033.14	422	17.94	19.04	20.33	18.98	16.96	14.47	18.41	19.11	20.06	18.5	18.03	17.13	19.13	18.93	14.69	18.64	18.97	19.79	18.87	19.71	18.42	18.49	18.63	19.24	19.48	19.52	17.82	18.97	17.66	19.51	18.75	18.64	19.45	18.37	16.32	18.43	19.52	18.95	19.63	19	15.61	19.73	19.16
1.53187	0.61529	0.0803077	0.591445	1.5124	227.2	238.5	14.91	17.46	15.83	17.74	17.26	14.66	18.15	17.66	16.68	17.07	17.58	17.66	17.28	16.99	14.83	15.5	15.08	17.73	14.69	16.74	16.56	17.33	17.45	16.27	16.8	14.59	16.67	16.55	17.73	16.45	16.04	16.83	14.64	16.01	17.18	15.39	15.86	16.54	17.2	14.95	16.19	14.21	15.39
0.521575	-0.939054	0.0918748	0.60538	1.5123	481.347	445.3	20.18	21.02	17.21	20.66	17.26	21.63	20.45	21.79	17.12	20.62	17.25	19.97	21.82	21.55	18.46	21.41	17.31	22.22	20.34	21.93	20.15	19.63	21.31	21.03	21.69	20.47	21.22	21.24	17.47	21.45	21.54	22.31	21.73	20.78	20.46	20.56	22.02	22.16	21.4	21.91	19.56	21.59	17.43
2.15691	1.10897	0.160989	0.694957	1.51029	669.29	305.7	17.11	17.98	14.96	15.48	16.61	14.74	16.78	14.47	14.94	15.21	16.42	15.98	16.52	17.33	15.74	12.66	15.94	12.27	14.18	18.09	18.37	12.58	14.55	16.83	11.72	17.54	15.49	15.5	17.09	15.98	16.68	16.22	11.08	16.71	17.83	14.5	11.13	15.53	15.01	13.81	14.65	16.28	12.38
1.77747	0.829828	0.0851433	0.597324	1.50967	1164.25	423.5	15.66	18.24	16.6	19.15	18.42	19.22	19.37	17.86	18.57	17.87	18.9	17.76	18.74	18.34	15.67	16.21	19.15	15.49	16.73	15.87	16.75	18.51	18.67	18.78	15.56	15.42	18.1	19.47	17.91	18.02	15.48	15.63	17.07	18.99	19.44	19.23	15.29	15.17	15.89	18.65	18.14	18.83	16.06
2.39264	1.2586	0.0778435	0.591445	1.50775	125.107	188.6	17	11.75	16.55	16.84	17.9	16.48	12.07	17.08	16.47	16.07	17.14	14.81	17.55	14.37	16.37	13.48	15.1	16.7	12.02	17.27	17.1	13.23	17.36	15.63	17.23	15.62	12.16	16.05	12.25	11.68	16.95	17.28	11.68	14.87	12.44	16.74	12.88	11.33	16.47	12.98	11.85	11.23	17.31
1.65538	0.727161	0.144415	0.676377	1.50695	215.981	574.5	18.79	18.87	15.64	17.7	17.65	18.39	18.92	18.56	17.76	17.88	17.47	15.68	17.66	15.6	19.71	16.27	15.86	17.5	17.65	18.81	19.18	19.57	16.51	17.71	15.63	15.48	17.15	17.53	17.73	15.19	17.47	15.7	15.49	16.32	18.44	16.05	18.31	17.97	15.94	15.75	17.45	17.91	17.88
1.58899	0.668108	0.154876	0.691709	1.5069	200.032	291.6	18.13	17.98	15.18	15.1	18.02	15.13	17.34	17.03	16.14	16.38	16.8	17.96	17.54	17.47	17.92	15.88	16.62	15.11	16.61	15.58	18.55	15.54	14.77	15.27	15.17	15.06	17.89	17.64	17.86	14.67	15.14	15.39	15.09	14.82	17.73	15.7	17.3	17.12	16.88	15.35	17.31	16.3	15.78
0.624016	-0.680344	0.0711684	0.574409	1.50521	865.775	41.8	18.38	17.86	19.24	17.3	17.72	16.63	17.36	18.23	17.34	13.66	15.56	14.41	17.03	17.67	17.8	18.25	14.72	18.32	17.95	17.33	18.3	18.45	17.37	18.33	17.71	17.83	18.17	18.55	14.51	18.19	17.9	18.06	17.52	19.15	18.14	17.13	18.07	17.17	17.9	18.05	18.8	16.98	17.72
1.70613	0.770731	0.0425663	0.504184	1.50168	311.268	337.7	13.95	14.15	15.76	14.08	15.1	13.3	14.96	15.8	15.38	14.63	12.67	14.97	15.48	12.35	12.41	15.3	13.76	14.83	14.03	13.07	12.35	13.14	15.02	12.54	12.49	12.44	13.87	10.73	15.59	15.2	12.48	13.38	13.68	11.81	14.69	13.48	14.18	11.27	13.17	12.85	14.42	11.17	16.88
2.03473	1.02484	0.0398324	0.493695	1.50154	352.806	44.9	14.8	19.5	14.65	18.98	20.48	18.3	18.81	17.56	17.5	18.31	19.69	14.68	18.3	19.02	18.07	15.41	17.54	18.57	14.53	18.02	14.72	15.08	18.19	19.01	14.61	18.04	18.91	17.81	16.66	19.33	14.6	17.55	17.87	17.69	18.54	16.07	15.99	15.73	15.11	19.77	14.5	14.05	18.14
2.08723	1.06159	0.0982377	0.61062	1.50049	157.133	126	19.46	16.83	18.21	14.66	15.8	17.3	17.13	18.27	18.78	19.62	17.18	19.5	18.97	14.74	17.09	15.57	15.13	18.88	18.58	15.24	14.88	15.23	17.14	14.92	16.65	14.62	19.17	14.25	15.04	14.22	14.8	18.68	19.03	18.88	19.31	17.33	14.5	14.3	15.26	19.26	14.73	18.66	18.92
0.605371	-0.724108	0.0958766	0.61062	1.49671	694.018	69.3	15.85	15.54	13.32	12.82	16.61	13	16.36	16.94	12.96	14.57	16.15	16.17	13.55	16.76	16.69	14.33	13.74	16.85	16.74	14.1	16.31	16.56	15.38	15.32	16.55	16.9	16.46	16.22	17.08	15.99	16.83	16.63	14.09	14.04	16.04	14.43	16.17	16.74	14.24	16.16	15.97	15.51	16.79
0.699642	-0.515312	0.181321	0.703149	1.49636	622.233	461	15.84	15.64	14.15	16.11	13.83	16.58	14.8	16.88	16.81	16.57	14.43	15.84	14.38	16.91	14.26	16.8	14.51	13.96	15.33	17.28	16.4	16.02	15.69	16.72	16.57	15.86	16.03	15.24	15.8	16.18	16.29	16.19	16.15	15.86	15.75	15.99	17.23	16.96	16.37	16.24	16.72	15.68	16.98
3.51506	1.81355	0.0183462	0.391171	1.49593	1200.05	298.3	17.45	17.65	17.34	16.48	15.62	17.07	17.07	16.69	16.86	17.55	11.33	18.12	17.34	10.73	11.05	18.72	16.13	10.47	10.51	11.6	17.36	11.62	17.7	17.83	10.92	16.97	16.88	8.52	10.69	10.21	15.12	11.86	10.35	10.61	17.26	11.83	17.58	17.34	12.65	17.2	10.13	9.59	18.02
1.48643	0.571849	0.0394762	0.493695	1.49551	341.159	509.6	12.57	13.14	15.46	13.73	13.09	15.12	14.47	15.3	14.57	13.19	13.82	13.57	13.1	15.92	14.11	15.09	13.45	14.05	15.76	12.17	13.24	14.2	12.88	13.06	13.38	14.45	13.57	13.04	13.36	13.83	11.52	12.47	13.51	13.2	13.82	15.89	13.31	13.32	14.09	11.99	12.55	12.35	14.01
0.648831	-0.624086	0.219318	0.73737	1.49475	518.907	431	15.41	16.33	17.52	16.32	17.35	15.84	16.42	16.8	17.64	16.2	16.02	15.39	17.75	16.79	11.27	17.72	16.88	17.96	17.37	17.87	16.4	16.28	16.58	16.31	17.13	16.55	16.44	16	16.3	16.93	17.11	17.69	17.05	16.22	14.35	16.08	17.04	16.85	17.3	17.02	15.43	17.09	17.71
0.674652	-0.567785	0.116685	0.624164	1.49213	505.31	405.6	16.98	18.85	16.82	16.8	18.72	16.76	19.04	19.53	20.21	19.01	19.59	18.77	19.4	19.1	18.2	19.17	19.28	20.27	17.83	19.94	18.83	18.62	19.88	19.23	18.82	19.77	18.82	19.03	18.35	19.7	20.25	18.95	19.2	19.69	18.07	20.55	19.52	19.52	18.77	16.85	19.18	18.88	17.09
0.603479	-0.728624	0.251331	0.777188	1.48833	1498.49	418	19.17	19.14	19.29	18.69	19.54	19.7	18.23	19.63	19.65	18.21	19.98	13.18	19.12	19.4	14.31	18.98	19.92	19.88	18.36	19.29	18.26	17.86	19.36	19.37	19.28	19.4	18.18	19.46	18.18	19.66	19.43	20.49	19.08	17.71	19.23	20.95	19.32	19.81	19.14	18.85	19.42	19.51	19.84
2.56513	1.35903	0.0827959	0.59444	1.48789	1488.99	417.7	16.23	19.14	22.67	21.52	18.18	21.88	15.85	21.33	21.17	17.17	17.91	16.13	21.31	20.85	19.81	16.68	20.5	22.16	20.19	20.89	16.26	16.31	15.74	19.98	16.05	15.94	15.91	15.72	17.36	15.71	16.01	21.13	15.94	20.94	16.38	19.96	15.83	15.8	20.78	20.66	19.13	15.78	16.48
0.69652	-0.521763	0.150671	0.683591	1.48414	713.821	41.2	16.78	17.04	16.51	16.26	16.7	16.26	16.47	16.15	17	18.51	17.08	18.54	16.42	15.94	17.02	17.19	16.72	16.94	16.61	15.35	19	16.7	18.71	16.99	16.81	17.03	16.51	17.58	17.7	19.06	16.88	19.12	17.45	17.38	18.11	18.58	16.36	17.72	15.36	16.88	17.08	16.7	18.56
3.48714	1.80204	0.0665676	0.574409	1.48356	326.376	383.2	10.17	17.95	16.99	16.94	17.12	15.98	9.92	16.9	17.27	18.59	16.3	17.41	16.21	10.17	13.88	17.27	16.9	16.55	15.81	16.22	10.41	20.37	17.78	10.58	10.32	10.35	9.92	17.78	17.06	17.55	10.38	11.31	14.66	15.93	9.97	11.25	10.83	12.18	10.92	10.66	15.5	10.86	10.88
2.02596	1.0186	0.0949934	0.61062	1.48318	943.787	41.6	18.37	18.93	19.45	15.58	16.02	17.08	17.52	14.15	17.13	18.24	18.2	18.54	19.81	16.94	18.74	17.7	13.85	15.77	16.93	14.22	17.69	14.28	18.32	13.7	17.67	17.33	17.79	17.53	15.7	18.65	17.48	18.97	17.05	14.11	19.01	19.32	17.6	18.42	17.45	17.34	18.35	12.4	14.3
2.01319	1.00948	0.0655214	0.570785	1.48214	549.466	559	12.91	12.01	16.92	16.38	17.38	15.56	12.34	15.78	16.26	15.35	16.7	16.28	16.96	13.53	17.6	13.67	17	15.58	12.31	13.38	12.76	13.48	16.02	16.1	12.75	16.39	15.63	15.57	16.51	15.22	12.73	13.69	16.04	16.1	12.69	13.76	13.89	11.63	13.52	13.17	17.41	11.51	13.4
0.673376	-0.570516	0.0717721	0.574409	1.48161	667.83	41.9	17.98	16.99	16.71	18.64	15.57	18.2	17.41	15.43	19.03	18.43	17.1	18.26	15.86	18.35	16.8	19.15	15.85	18.26	17.38	17.62	18.58	18.29	17.73	17.94	18.54	17.16	18.96	17.24	15.83	18.55	17.45	18.31	18.76	19.41	17.63	17.64	18.23	18.56	17.57	17.7	18.21	18.77	18.56
0.576975	-0.793419	0.317109	0.793814	1.48157	1064.68	396.7	20.61	21.4	22.5	21.9	20.52	22.43	21.1	22.77	23.23	20.6	19.69	20.6	22.75	22.15	18.06	21.92	23.59	24.38	22.08	24.89	20.99	22.26	22.93	20.39	22.1	22.01	21.34	20.6	20.17	23.04	24.29	23.31	22.55	21.06	18.95	21.64	22.39	24.18	21.47	21.97	19.57	23.14	21.82
0.483494	-1.04843	0.400627	0.823262	1.48117	583.296	392.9	15.34	17.74	18.41	18.02	15.75	18.67	16.03	18.27	17.63	15.16	16.39	16.67	18.39	18.73	11.08	17.97	19.2	18.89	18.36	19.36	17.53	17.36	18.16	17.21	17.44	18.15	18.09	17.35	19.23	18.32	19.43	18.91	17.9	17.93	11.81	11.86	19.04	19.08	17.67	18.63	16.96	18.22	18.99
0.633671	-0.658194	0.0652712	0.570785	1.47897	859.795	41.6	18.7	18.56	19.03	15.53	18.41	15.53	18.63	18.48	17.92	15.17	19.43	15.62	16.73	17.88	18.77	19.15	15.8	18.71	15.51	17.99	18.26	18.67	17.1	19.99	17.88	18.48	17.68	17.6	19.5	19.07	17.51	19.04	17.4	18.66	18.89	18.42	18.97	18.39	19.02	18.89	17.71	18.95	17.7
1.81447	0.859548	0.23282	0.752396	1.47647	589.477	572.7	14.6	15.08	15.37	13.85	15.16	11.68	15.3	15.47	15.44	15.91	15.58	16.23	15.84	15.95	16.18	14.11	12.59	14.98	15.18	12.98	15.42	15.5	16.55	12.48	14.3	16.18	11.92	16.71	16.66	11.52	12.37	13.28	15.63	15.36	16.62	13.36	11.69	15.43	13.08	15.87	15.4	15.28	12.99
1.75646	0.812667	0.0397124	0.493695	1.47581	389.772	587.9	11.57	11.1	15.09	13.24	15.12	13.34	13.57	14.99	15.85	15.85	15.9	15.49	13.55	15.17	12.61	12.51	14.47	13.13	15.48	12.4	11.74	15	14.78	13.85	11.69	13.77	11.31	15.13	11.41	13.87	14.66	12.71	14.55	15.2	11.6	12.82	14.86	14.84	12.35	12.21	13.56	14.36	12.24
0.597224	-0.743656	0.0702252	0.574409	1.47399	95.0434	38.9	13.63	12.82	15.7	15.13	15.87	16.08	16.54	17.16	15.15	15.84	16.37	14.78	16.27	13.48	13.58	16.28	13.8	15.51	14.3	17.62	16.77	14.27	15.2	15.84	14.98	17.15	15.94	14.39	15.65	16.98	15.2	16.85	12.99	15.51	17.7	18.1	16.72	16.07	15.15	16.05	17.05	18.01	16.45
1.50124	0.586151	0.0753363	0.582996	1.4739	435.089	510.3	14.46	13.39	13.58	13.45	13.74	13.66	13.36	14.05	12.78	14.08	15.66	14.81	14.12	14.55	14.47	11.55	14.48	13.98	13.2	11.53	14.14	14.94	12.98	14.41	10.88	14.07	13.6	12.65	14.57	13.69	14.6	11.81	13.98	13.22	14.57	12.99	13.17	13.62	14.7	14.34	13.84	13.83	11.34
1.53736	0.620452	0.055981	0.555981	1.47277	401.1	220.9	18.42	17.91	16.51	17.99	18.07	18.35	18.21	18.25	15.27	17.68	15.59	18.1	17.79	17.16	17.41	16.1	15.65	18.5	15.35	16.66	17.24	15.71	17.83	17.84	15.43	15.28	15.21	17.33	18.14	16.73	15.37	15.55	17.22	16.21	15.71	17.05	17.83	17.84	18.28	17.89	18.38	17.74	17.77
0.669153	-0.579591	0.0947087	0.61062	1.47212	765.602	594.7	15.86	11.81	16.98	16.28	16.24	16.81	15.98	14.93	16.69	16.11	16.6	15.89	11.71	16.09	16.21	17.53	16.17	15.75	15.08	17.03	16.48	16.21	16.3	16.64	16.47	16.08	16.14	15.64	16.5	15.83	16.46	15.86	16.27	16.01	16.49	16.01	15.89	15.82	16.02	16.05	16.03	14.97	15.91
1.47253	0.558301	0.175444	0.703149	1.46981	223.153	288.6	19.38	19.05	17.94	19.19	19.04	19.05	19.34	19.19	19.13	18.16	17.83	16.85	18.99	16.8	19.32	18.27	16.94	18.85	16.79	19.28	19.59	18.59	16.55	16.89	19.34	18.8	19.23	16.62	17.06	18.37	16.75	16.67	16.72	18.41	17.1	17.11	18.55	18.78	18.57	18.37	16.88	19.04	18.86
0.540073	-0.888774	0.0887568	0.603355	1.46818	439.986	48.7	18.06	13.08	14.7	17.92	17.35	13.36	17.84	17.94	16.52	12.87	16.99	17.3	13.88	17.4	17.16	15.69	17.51	17	17.78	16.32	18.44	18.96	18.6	16.13	18.41	17.29	16.58	17.34	19.28	16.86	18.48	17.88	17.05	16.97	17.1	14.69	16.87	17.09	15.94	15.99	13.18	16.85	14.48
3.32114	1.73168	0.0287688	0.448193	1.46709	283.656	394.3	15.39	9.18	16.43	16.99	15.78	17.42	17.01	17.24	16.98	15	10.3	15.43	18.41	17.1	9.97	16.82	17.75	17.99	17.41	10.66	10.35	15.68	18.43	11.41	10.17	10.21	9.47	15.77	15.62	14.25	10.25	11.11	15.22	11.17	9.86	11.04	16.29	15.82	10.73	10.43	9.47	16.1	10.76
0.562244	-0.830731	0.0474625	0.524323	1.46622	351.896	39.2	16.6	15.79	16.06	16.95	15.7	16.46	15.79	10.71	14.64	16.75	11.99	11.47	13.82	16.32	14.86	14.51	15.28	18.07	15.29	16.86	15.74	16.23	15.01	15.78	15.59	16.96	14.84	14.93	15.26	16.54	17.12	14.7	17.86	14.14	16.46	13.62	15.38	14.49	17.16	15.48	14.67	15.25	16.24
0.528872	-0.919011	0.0580112	0.559298	1.466	419.883	39.7	16.51	13.04	13.66	13.1	15.24	16.79	18.63	13.14	13.31	12.83	16.64	18.04	13.86	16.31	15.71	15.49	13.98	15.61	13.41	16.34	16.86	16	14.65	13.82	16.13	15.31	18.32	17.88	17.05	15.57	17.35	16.97	17.93	17.71	16.49	15.77	15.01	14.87	16.79	16.38	13.12	14.03	18.63
0.572366	-0.804989	0.120211	0.632049	1.46585	784.706	47.5	18.75	17.29	10.94	18.75	17.91	18.03	18.03	17.73	17.28	17.46	16.57	18.89	12.34	18.17	18.14	20.24	18.31	18.03	17.93	17.92	18.08	17.86	17.05	18.4	17.88	17.74	17.98	17.25	17.04	17.83	18.09	17.14	17.98	17.5	17.84	17.03	16.92	18.36	18	17.52	18.22	18.08	17.31
1.82059	0.864409	0.180244	0.703149	1.46525	450.319	348.1	23.77	23.79	23.09	21.46	22.71	24.14	22.95	23.59	23.62	21.58	24.96	24.81	22.58	24.21	24.89	24.43	22.84	22.77	23.48	20.84	24.65	23.9	21.37	22.57	19.38	23.77	23.84	23.59	19.77	24.38	22.63	22.95	23.42	24.89	23.07	22.75	22.54	18.22	23.98	22.07	23.02	22.81	18.47
2.68821	1.42665	0.349398	0.807518	1.4637	456.37	335.6	16.21	17.56	16.13	16.13	16.97	16.38	16.25	10.25	12.59	14.17	15.84	16.44	14.67	15.49	16.61	10.76	9.82	9.42	15.39	15.04	15.38	15.63	9.08	10.21	16.07	10.17	14.07	13.82	16.44	16.04	15.36	17.11	15.34	15.56	15.79	17.87	9.65	16.42	15.56	10.35	14.79	13.8	16.47
3.1141	1.63882	0.0395024	0.493695	1.46246	333.171	509.5	13.59	7.16	12.76	14.82	13.59	16.82	11.19	12.53	11.49	13.63	14.43	13.9	12.06	17.3	6.93	8.31	13.53	14.13	8.52	8.52	7.81	8.52	13.19	8.17	11.04	14.81	14.69	13.13	13.99	12.65	7.52	8.84	12.31	14.3	7.67	8.73	7.81	11.97	8.52	8.73	6.93	13.76	16.34
1.47717	0.562839	0.0791496	0.591445	1.46207	333.05	50.7	20.38	19.92	18.44	19.92	19.62	19.42	20.04	19.13	18.21	18.4	19.37	20.68	20.5	17.29	19.65	19.02	18.87	19.97	19.87	17.45	17.47	18.98	19.74	19.17	17.29	19.74	20.17	18.8	20.09	19.53	17.26	18.5	19.45	19.49	17.57	17.53	18.82	19.2	17.38	18.64	20.11	19.79	17.52
1.56945	0.650258	0.0214666	0.414865	1.46092	302.018	60.7	20.12	22.61	22.75	22.75	22.58	22.49	19.94	22.27	21.77	22.41	22.77	22.73	22.34	19.96	22.63	21.67	22.65	22.37	22.55	19.8	20.25	21.14	22.27	22.55	19.96	19.8	22.54	22.49	22.24	22.14	19.68	19.65	22.12	22.08	20.16	20.11	22.26	22.02	19.92	19.91	22.57	22.39	19.92
1.77787	0.830151	0.104128	0.610923	1.45991	243.959	37.5	15	15.61	16.59	14.27	11.47	17.01	15.8	13.82	11.74	17.46	14.88	16.86	14.67	14.48	15.11	13.41	12.78	15.38	11.92	16.27	15	15.49	14.33	15.08	15.27	14.12	14.23	10.78	13.97	15.15	14.73	15.16	13.92	14.46	12.36	15.36	15.27	14.52	14.79	12.92	12.68	14.51	15.89
1.71846	0.781118	0.0161659	0.367835	1.45891	355.01	59.1	16.59	20.06	19.43	20.07	19.47	19.48	16.24	20.19	19.73	19.36	19.97	19.26	19.15	16.41	20.11	17.8	19.26	19.39	19.21	16.68	16.61	17.98	19.24	19.9	16.41	16.29	18.23	18.9	19.66	19.66	16.37	16.37	19.47	19.83	16.74	16.79	20.02	19.98	16.65	19.43	19.17	17.9	16.75
0.613456	-0.704968	0.0600845	0.561654	1.45703	712.284	408.4	16.79	15.62	17.52	18.74	18.33	18.48	16.48	13.74	18.33	13.67	17.7	14.86	16.57	16.43	17.18	18.34	18.27	17.99	15.46	17.8	16.65	18.12	16	19.16	17.63	15.9	18.83	16.3	17.63	16.11	17.27	15.96	17.19	17.78	18.11	18.48	18.27	16.55	18.64	18.34	16.18	16.52	16.34
0.592295	-0.755613	0.0691464	0.574409	1.45438	145.985	424	18.99	18.78	15.9	15.84	18.34	18.69	19.73	15.69	17.66	15.54	16.01	18.02	16.1	19.03	18.57	17.91	18.3	17.56	18.85	17.63	19.52	19.43	19.29	15.95	19.63	20.17	19.17	18.98	16.09	18.6	18.79	18.41	18.44	15.57	18.78	17.17	19.38	15.56	18.6	18.56	17.87	18.85	19.62
2.01529	1.01099	0.10748	0.612125	1.45371	247.241	526.2	14.92	14.07	15.15	15.12	13.66	11.91	15	13.95	13.88	16.98	11.93	16.19	16.09	15.53	15.08	15.17	14.07	11.1	13.38	12.22	15.58	14.68	15.4	18.08	11.53	15.51	11.16	14.46	15.12	11.9	15.99	15.83	15.24	15.73	15.03	12.67	12.96	15.73	12.21	12.02	10.92	12.05	12.06
1.52612	0.609871	0.0997381	0.61062	1.45205	484.309	527.6	16.69	16.42	16.92	16.54	16.61	15.84	13.52	16.52	16.75	16.47	17.2	16.72	16.21	15.19	17.14	17.37	16.88	16.49	15.53	16.92	16.94	14.5	12.96	16.57	13.83	13.81	16.1	16.48	16.79	15.86	16.8	14.51	16.1	16.08	13.99	14.78	14.44	16.15	14.54	16.26	16.34	15.97	14.58
1.56912	0.649957	0.373263	0.816413	1.45075	412.359	416.8	18.58	18.72	18.48	18.11	18.69	16.68	19.26	18.93	18.59	18.7	18.94	19.01	18.89	18.47	19.23	18.37	17.88	15.26	18.67	17.82	19.14	18.06	16.24	17.94	18.98	18.63	18.68	17.88	18.94	16.36	18.69	18.21	17.1	19.07	19.25	19.03	13.89	15.4	18.87	18.73	19.01	18.77	19.13
2.1928	1.13277	0.33518	0.799033	1.44978	484.347	318	19.91	17.59	16.48	17.04	17.49	16.76	16.26	16.62	15.79	16.49	18.39	19.63	16.84	15.98	20.27	13.98	16.41	17.21	17.59	15.52	13.1	18.23	14.29	13.22	13.12	18.54	18.23	17.78	12.86	17.92	18.36	19.19	18.15	19.4	17.31	15.38	12.51	12.07	18.81	16.44	17.88	14.74	17.47
0.637879	-0.648645	0.0271952	0.448193	1.44831	302.305	348.6	18.41	17.7	18.7	18.48	18.63	18.32	18.51	17.3	17.6	19.94	18.91	18.6	18.92	17.44	17.82	17.57	18.28	17.89	19.18	21.88	17.25	17.83	18.76	19.07	17.98	20.21	18.26	19.25	20.73	18.93	17.8	19.56	18.83	19.77	17.31	19.38	17.6	17.13	19.2	20.06	21.28	17.93	20.68
1.93006	0.948645	0.334154	0.798461	1.44689	246.784	47.6	16.53	16.98	13.92	18.95	17.1	16.33	18.07	15.12	19.58	18.35	14.26	16.19	18.04	16.42	18.53	14.82	16.04	16.36	16.9	17.7	14.93	16.18	16.17	16.24	16.34	15.89	16.32	12.91	19.02	13.01	17.03	18.59	13.53	17.76	14.1	14.84	13.37	13.13	14.6	19.12	17.48	16.75	16.18
0.500641	-0.998151	0.150837	0.683591	1.44686	542.823	39	17.2	18.37	12.52	15.93	18.17	17.69	17	14.92	17.48	11.72	14.76	16.41	18.19	16.82	15.63	18.08	17.66	18.04	15.6	18.57	17.14	13.56	17.18	13.8	18.62	17.91	18.52	17.77	13.98	17.29	16.38	16.9	17.84	18.12	18.06	17.78	17.07	18.53	17.06	18.98	12.16	18.96	18.46
1.41668	0.502516	0.036334	0.473429	1.44584	481.98	88.4	16.18	17.76	18.87	18.04	17.55	17.8	15.82	17.54	17.94	17.66	18.46	16.1	18.6	18.58	18.42	16.63	16.23	18.2	18.08	16.3	16.21	16.25	18.15	17.83	16.01	15.9	18.28	18.02	17.75	17.65	15.97	17.54	18.25	17.9	16.35	18.23	17.57	17.12	16.34	17.05	18.42	17.94	16.45
0.427355	-1.22649	0.228054	0.751022	1.44469	180.038	328.2	12.16	14.89	17.8	11.29	17.15	12.42	16.74	11.41	16.65	10.86	16.31	12.85	16.43	14.35	14.52	15.53	17.07	15.99	16.91	16.91	16.01	16.17	17.72	17.77	15.27	14.91	15.78	14.5	11.9	14.61	18.26	13.06	15.33	17.74	18.1	13.17	17.35	17.33	16.95	17.38	11.51	10.73	16.92
1.94175	0.957355	0.0814346	0.59444	1.44201	137.071	46.3	15.25	17.87	15.49	19.18	16.51	18.58	18.43	17.22	17.31	17.86	14.42	17.26	17.81	14.08	17.7	15	17.71	16.99	13.96	16.89	14.11	14.74	13.39	16.89	18.5	14.03	13.87	13.23	17.85	17.67	17.86	19.1	17.79	15.31	14.32	14.98	17.16	17.03	14.72	18.44	17.29	13.32	18.25
1.4135	0.499269	0.0860036	0.597324	1.44138	604.817	47.5	17.92	17.24	16.85	17.4	16.97	17.74	17.66	18.84	16.71	17.21	17.16	18.12	19.07	18.87	19.2	16.32	17.83	18.36	17.94	18.74	16.88	18.62	18.23	17.47	17.27	17.75	17.81	15.33	17.74	17.35	17.67	15.77	16.85	16.79	16.01	16.11	18.58	16.64	17	15.82	17.75	18.32	16.17
0.62397	-0.680452	0.0367649	0.477005	1.43983	732.617	519.5	16.53	16.36	13.31	15.31	16.58	16.18	16.11	12.78	12.95	15.38	16.49	13.34	15.97	16.71	13.49	17.06	13.73	16.59	16.08	16.52	16.72	16.34	15.52	15.43	16.35	15.81	15.85	15.36	13.32	16.79	16.08	16.01	16.39	15.01	16.73	16.27	16.96	14.54	16.36	16.62	16.77	13.64	17.17
3.99589	1.99852	0.385603	0.820059	1.43981	593.332	273.7	13.87	20.62	22.44	20.94	20.35	13.36	23.62	18.64	13.37	14.01	17.47	21.88	17.62	20.59	17.88	14.63	19.72	13.47	20.68	14.34	13.75	14.42	12.76	13.85	13.7	24.29	16.7	20.67	18.24	12.82	13.74	17.73	13.29	23.56	13.87	14.68	13.19	12.85	14.46	20.44	20.73	23.28	14.47
0.512985	-0.963011	0.0237465	0.438898	1.43918	806.816	41.4	18.43	18.23	18.13	17.42	16.97	18.65	16.52	13.37	13.51	16.82	14.21	13.75	14.04	16.44	19.46	19.29	17.6	13.61	17.33	15.2	19.35	16.52	13.02	14	18.52	17.54	18.43	17.93	17.58	17.32	18.13	18.3	18.44	17.61	17.54	18.78	17.66	18.66	17.35	18.34	16.72	18.11	16.49
2.76494	1.46725	0.112048	0.616045	1.43901	509.242	349.8	11.6	17.34	17.26	16.17	14.52	17.22	18.2	17.29	17.07	15.14	19.79	18.75	16.3	18.36	18.86	17.54	16.97	16.34	16.92	14.83	18.81	17.83	10.71	17.75	11.71	18.89	17.92	10.09	12.47	18.47	11.8	12.72	17.1	11.33	11.63	17.73	16.61	10.61	18.24	16.5	17.2	17	12.27
0.564899	-0.823935	0.11333	0.61785	1.4326	1279.31	421.6	19.62	18.59	19.86	18.48	15.07	15.09	18.92	18.1	19.01	18.96	15.36	15.23	17.77	18.2	15.26	15.85	18.8	19.43	17.82	18.65	15.24	18.54	18.88	18.69	19.57	18.99	18.79	15.82	18.38	20.43	19.15	20.13	18.82	17.36	15.41	19.2	17.89	18.97	19.56	18.16	16.99	19.14	18.32
2.83033	1.50097	0.0571747	0.558296	1.42993	737.281	286.8	16.47	10.63	16.91	15.43	17.93	16.83	17.09	17.65	15.81	10.28	16.16	13.58	17.65	11.27	13.86	18.12	16.21	16.69	10.9	12.04	16.74	12.12	10.25	11.55	11.33	11.51	11.01	14.28	18.38	15.99	15.85	17.54	11.52	16.06	11.22	12.43	17.17	16.28	12.01	13.44	10.78	10	11.86
0.666535	-0.585247	0.274135	0.786816	1.42906	1016.68	412	19.31	19.93	21.13	19.83	18.97	20.13	19.1	20.66	21.4	19.54	19.54	18.78	20.8	19.82	16.52	20.4	20.9	22.19	19.5	22.3	17.89	19.71	20.98	19.84	20.2	19.96	19.84	19.22	18.41	20.78	21.4	21.01	20.75	19.93	18.05	20.08	20.4	20.93	20.53	20.11	19.72	20.75	19.97
0.64112	-0.641333	0.355292	0.811688	1.42841	274.126	383.7	14.37	14.77	17.95	14.63	14.89	17.31	15.68	16.32	16.5	15.33	13.57	15.65	16.97	16.74	13.3	15.99	17.61	16.89	15.92	17.03	15.4	15.6	16.6	16.32	16.23	16.56	14.89	15.39	14.21	17.02	16.28	15.97	15.85	14.03	14.91	14.25	17.07	15.85	16.99	16.12	17.68	17.54	17.81
1.73641	0.796108	0.0852488	0.597324	1.42784	486.903	48.1	17.91	18.09	16.55	16.25	17.61	17.25	18.21	16.94	16.05	16.87	16.7	18.22	18.77	17.72	17.7	15.18	16.89	18.04	18.02	18.67	16.8	17.58	17.23	17.36	16.98	17.62	18.28	13.58	18.44	17.75	14.34	14.88	14.11	15.89	15.63	15.13	13.9	18.48	17.57	14.63	17.89	18.29	15.03
1.65558	0.727333	0.232476	0.752396	1.42637	504.238	346.7	21.24	20.23	20.23	17.76	19.18	20.48	20.8	20.07	19.81	19.01	21.46	21.72	19.86	20.89	22.47	18.91	20.11	19.88	20.35	16.79	21.03	20.91	17.29	19.16	18.09	21.62	20.56	20.05	18.69	21.28	19.96	19.73	20.14	21.15	20.2	18.16	19.25	15.2	20.55	19.04	19.77	19.38	20.67
0.329224	-1.60286	0.132948	0.65912	1.42272	203.091	275.8	17.04	9.53	10	17.63	16.28	14.28	10.05	17.14	15.24	9.01	15.32	10.38	16.23	16.86	10.38	18.51	10.43	14.34	10.96	17	17.52	17.67	15.6	16.83	16.81	16.27	18.59	16.19	10.32	15.67	18.15	15.6	17.42	10.05	14.83	15.1	15.96	9.42	16.83	10.73	18.11	15.15	17.41
0.671862	-0.573763	0.185186	0.704908	1.42214	974.577	580.4	14.22	14.78	16.54	15.46	14.57	14.86	15.04	16.64	15.8	12.09	15.04	13.07	15.92	15.61	14.66	15.82	16.95	16.51	15.41	16.95	14.07	15.42	15.12	13.36	16.25	15.46	14.89	15.02	16.09	14.76	16.06	16.43	15.56	15.81	13.32	14.22	15.19	15.01	15.9	16.23	14.28	15.53	16.84
1.57242	0.652989	0.288635	0.789603	1.42145	153.982	579.8	18.44	17.55	16.3	16.45	17.04	16.63	18.3	14.06	16.86	17.78	16.71	17.93	17.07	18.22	14.5	15.23	14.75	16.8	16.87	14.91	17.44	15.71	16.89	14.51	16.94	16.85	16.81	17.18	17.46	16.12	16.66	17.58	17.3	16.87	14.65	15.17	13.99	13.78	16.66	14.68	17.38	17.32	16.86
0.481889	-1.05323	0.259999	0.783832	1.4207	1024.65	409.2	16.57	16.71	13.87	13.36	13.41	19.01	18.05	18.55	19.24	18.48	14.22	13.79	18.18	18.09	14.92	18.7	14.21	19.77	17.76	19.3	18.53	14.54	18.14	16.83	18.31	17.94	16.04	17.61	17	19.04	19.63	14.55	18.08	17.61	14.04	14.81	19.35	19.03	17.02	17.36	18.07	18.03	18.38
0.496265	-1.01082	0.20427	0.722593	1.42059	440.277	339	16.93	18.47	17.22	12.35	12.13	13.8	16.05	17.41	18	17.1	13.37	17.82	16.34	16.72	13.06	17.88	16.41	15.19	16.76	17.18	17.23	13.78	17.48	18.45	16.54	16.36	18.85	12.84	12.81	16.38	19.36	18.27	14.14	15.12	16.79	17.37	17.58	16.49	17.44	18.97	16.28	18.33	18.33
2.99063	1.58045	0.178064	0.703149	1.41998	231.993	365.5	16.41	15.19	17.29	17.69	17.4	15.79	15.41	16.63	17.36	17.19	18.18	17.33	16.25	15.48	12.76	8.92	16.66	16.59	15.85	15.98	15.03	15.92	8.31	17.78	14.29	16.99	17.55	16.97	17.06	7.37	15.76	9.28	15.1	7.52	14.75	18.98	17.88	16.48	8.92	16.32	14.43	16.66	17
0.376755	-1.4083	0.0593817	0.561654	1.41964	746.339	355.5	12.69	16.99	12.15	11.75	16.89	11.93	17.53	11.77	16.23	17.94	18.96	18.11	12.48	16.44	16.18	17.5	12.86	12.16	18.33	14.9	17.04	18.05	16.53	18.72	17.51	20.24	17.64	18.71	15.74	18.14	16.89	19.5	11.72	20.37	15.07	14.92	11.98	15.45	17.81	19.89	17.77	18.25	17.97
0.424757	-1.23529	0.347052	0.807281	1.41942	1113.68	394.7	13.58	18.35	19.14	17.33	12.81	18.4	17.67	18.58	18.94	12.53	13.84	13.38	18.09	18.27	13.53	18.45	19.23	19.31	17.85	19.78	13.49	14.23	18.34	17.86	17.01	18.06	14.21	17.62	13.38	17.53	19.61	19.44	18.32	17.88	13.62	18.81	19.58	19.09	18.31	16.89	12.87	18.32	19.27
0.332067	-1.59045	0.322726	0.794027	1.41783	795.468	411	12.04	17.23	19.18	11.13	10.96	18.75	18.2	18.5	18.47	10.78	12.37	11.8	18.06	18.24	15.83	17.89	18.76	19.29	18.88	18.88	18.3	12.79	18.56	12.13	18.94	18.52	18.43	10.28	11.83	18.24	17.19	16.92	12.21	17.26	11.91	17.12	19.23	18.18	18.35	18.57	18.38	18.21	18.37
0.319196	-1.64748	0.370172	0.811688	1.41748	336.051	327.2	13.08	8.92	15.1	15.56	8.92	16.52	9.21	15.61	14.91	8.42	9.92	15.74	17.61	15.15	15.25	14.97	18.03	10.51	18.29	11.27	16.54	16.49	15.7	17.36	16.44	18.03	16.54	16.29	9.59	14.62	13.62	10.73	14.85	16.14	18.49	10.71	18.15	17.95	16.97	15.28	9.21	14.58	17.98
0.564444	-0.825097	0.0486835	0.532029	1.41699	959.196	53.7	16.1	16.11	13.43	15.92	15.93	13.15	16.36	12.94	13.1	12.67	16.11	17.39	17.94	17.09	16.79	15.27	13.85	17.72	17.02	18.04	17.57	14.28	16.29	16.13	13.53	16.49	17.88	16	15.98	14.69	17.26	14.32	16.77	18.3	16.99	14.51	16.79	16.21	15.94	13.9	16.32	16.55	17.47
2.44886	1.29211	0.0895866	0.603355	1.41634	445.179	484.3	16.52	15.36	16.19	13.86	12.15	16.99	14.65	16.62	12.49	15.2	11.05	18.6	10.66	16.95	16.59	11.36	16.29	15.31	14.12	11.25	14.63	16.71	16.18	10.94	11.75	16.72	10.35	15.47	15.98	13.3	10.78	11.72	14	16.03	10.63	15.76	16.53	15.56	11.22	11.12	15.15	15.4	11.17
0.489141	-1.03168	0.134322	0.659287	1.41618	775.833	40.9	18.05	16.84	18.07	18.68	12.67	17.55	17.12	17.96	16.88	12.41	13.73	13.25	13.47	18.14	19.65	18.06	13.66	18.04	13.03	18.48	17.51	17.52	18.51	13.53	17.23	18.09	17.83	17.77	17.5	18.53	18.05	18.63	16.48	17.99	18.04	16.91	18.71	17.38	17.56	17.96	13.99	18.25	18.28
0.679112	-0.55828	0.220333	0.73905	1.41578	1097.63	431.4	16.65	17.52	14.96	17.91	17.29	17.8	17.21	18.49	14.82	17.63	17.63	17.56	15.21	17.58	17.54	18.35	18.12	18.53	17.65	18.73	16.33	17.64	18.22	18.06	17.6	17.82	17.66	16.97	17.49	18.36	17.65	18.49	17.93	17.61	16.32	16.52	18.19	18.43	17.63	17.93	17.41	14.47	18.5
0.375208	-1.41424	0.168512	0.696199	1.41501	148.075	283.3	12.55	11.72	15.98	17.81	11.51	19.06	15.88	19.17	14.47	11.25	16.76	12.16	19.36	13.27	18.08	18.19	17.32	12.02	11.95	19.04	13.45	13.19	17.68	12.62	18.15	17.29	19.43	19.46	17.7	17.3	19.22	13.45	13.75	16.55	17.72	17.73	13.44	17.47	19.22	18.57	19	17.81	18.08
0.500634	-0.998172	0.0241046	0.442741	1.41474	334.146	290.9	15.82	17.66	17.01	12.18	17.74	12.32	17.88	14.8	17.72	16.89	17.06	17.25	14.88	15.45	14.99	17.6	16.49	15.53	18.92	16.55	16.2	17.73	15.92	17.74	16.53	19.97	17.99	19.71	17.46	15.83	16.97	18.68	12.12	19.8	16.83	15.81	14.29	15.18	17.59	18.69	18.47	18.6	17.64
2.19473	1.13404	0.208392	0.725971	1.41124	948.797	289.9	18.22	12.37	18.63	12.37	18.01	12.48	17.32	17.87	14.73	16.2	14.87	17.34	17.81	16.05	16.56	18.63	15.32	16.54	16.33	13.74	13.09	18.1	16.21	13.21	13.1	17.45	12.63	11.71	12.85	16.48	16.53	14.02	14.88	16.67	13.11	17.94	15.85	13.52	18.24	13.49	12.44	12.97	13.76
1.57477	0.65514	0.389368	0.821954	1.40601	387.141	482.8	18.02	19.51	17.61	19.4	16.34	16.25	16.73	16.51	16.77	18.2	16.3	17.42	17.5	16.52	17.46	13.59	16.14	16.84	16.65	17.06	16.58	16.71	16.42	17.39	18.26	15.08	15.96	16.11	16.75	16.62	17.81	17.6	16.78	16.81	18.62	17.71	16.41	16.47	18.51	17.34	17.47	16.77	12.21
0.399331	-1.32434	0.072944	0.574409	1.40582	192.032	53	15.49	13.11	15.53	17.74	10.05	10.41	17.35	14	13.03	13.92	15.01	10.92	17.56	15.45	13.21	13.04	14.11	14.78	16.31	11.68	15.06	14.96	16.98	16.47	11.01	16.78	10.63	11.69	14.6	17.24	15.36	17.86	16.43	18.85	17.02	17.1	10.58	16.54	16.24	15.83	13.53	17.81	18.14
1.41358	0.499355	0.174303	0.703149	1.40506	356.754	47.2	17.31	16.68	16.88	16.9	17.03	17.09	17.04	16.99	17.39	17.31	17.04	17.01	17.63	18.85	17.15	15.56	17.42	17.36	17.27	17.94	16.62	17.75	17.28	17.37	17.51	17.44	17.21	15.92	17.01	17.01	17.73	17.09	15.72	18.34	17.67	15.43	16.34	14.28	17.49	16.09	14.72	16.59	15.43
0.392696	-1.34852	0.234384	0.752671	1.40497	440.275	384.8	12.93	15.15	10.35	10.17	9.53	16.94	15.57	16.58	16.1	9.47	15.27	10.73	15.49	15.91	10.9	11.47	15.34	17.24	10.43	15.87	15.63	11.47	14.95	11.01	16.36	16.05	14.83	10.25	16.55	15.66	10.9	16.83	15.59	16.79	13.16	17.08	15.8	15.31	11.33	16.64	15.94	12.59	16.78
1.85611	0.89228	0.0743181	0.57658	1.40423	112.112	305	19.88	17.71	20.03	19.91	17.57	16.84	15.42	20.12	19.49	19.68	19.7	16.77	19.97	17.96	20.66	16.34	17.5	18.98	19.34	16	15.82	18.82	17.6	20.33	15.7	18.45	20.23	18.23	18.3	18.85	18.82	18.82	15.58	20.44	16.03	16.12	15.46	20.19	20.11	17.08	15.68	15.35	18.02
3.384	1.75873	0.0437183	0.504913	1.40231	309.02	259.3	10.38	9.71	15.38	17.08	16.06	19.74	10.21	18.6	18.09	17.33	18.85	11.52	17.63	17.34	17.59	17.92	10.58	13.2	17.71	11.04	10.69	11.17	14.8	10.83	10.47	10.66	18.36	15.94	19.14	9.71	10.66	17.19	15.92	16.28	10.41	14.73	15.59	17.28	11.12	10.96	18.21	16.61	11.08
2.66932	1.41647	0.0479401	0.527688	1.40135	411.767	385.9	12.25	17.91	17.5	17.95	18.09	18.67	11.66	17.96	17.32	17.26	12.5	17.97	17.57	16.6	18.25	17.09	17.39	11.68	18.06	12.82	12.13	17.63	18.37	12.31	12.17	17.41	17.3	10.43	17.55	14.73	17.53	13.14	17.63	12.38	12.07	17.94	18.27	11.01	12.92	12.58	16.75	17.34	16.61
1.6963	0.762387	0.0484078	0.530918	1.40013	585.899	581	15.44	15.84	15.83	13.9	15.82	16.04	16.17	15.16	14.85	16.14	15.74	16.85	16.4	14.3	15.88	12.75	15.01	15.03	16.29	11.33	16.12	15.36	16.11	16.04	15.45	10.94	17.32	14.58	15.54	15.13	10.83	11.74	14.91	14.87	15.69	15.12	14.67	14.81	16.27	15.2	15.22	15.66	16.58
0.700424	-0.513699	0.239157	0.761158	1.3996	1109.58	431.5	17.96	16.89	18.78	17.01	17.02	17.9	17.94	18.25	18.61	17.84	15.42	16.3	15.47	17.51	15.33	18.37	17.89	15.17	17.69	18.14	17.37	15.58	18.23	18.25	18.07	17.91	18.39	17.09	17.94	18.17	17.35	18.12	18.21	17.54	18.54	17.86	18.53	18.1	17.26	18.46	18.05	17.88	17.98
0.658526	-0.602688	0.295647	0.792819	1.39933	291.14	433.1	16.38	18.5	18.71	16.63	16.25	16.51	17.4	17.21	17.29	17.59	17.43	16.69	16.66	17.18	14.67	16.04	18.91	17.38	18.64	18.99	18.01	16.97	17.27	18.58	16.93	16.55	18.27	18.4	16.9	19.17	18.61	19.41	18.44	16.45	13.81	16.17	17.49	17.4	16.3	18.09	17.44	18.93	17.24
0.738917	-0.436516	0.101228	0.61062	1.39908	424.361	476.5	14.55	16.34	16.36	15.93	15.37	15.45	16.57	14.05	16.58	15.39	16.52	16.23	15.75	16.69	16.54	17.21	14.75	17.13	17.08	16.41	16.17	16.78	16.65	16.17	17.05	16.13	16.78	16.9	14.53	16.04	17.16	14.91	16.96	16.58	16.59	16.71	15.93	16.45	16.36	16.39	14.17	16.75	17.37
0.437005	-1.19428	0.0638146	0.567262	1.39856	689.495	594.5	14.58	14.45	13.46	10.21	14.9	10.21	15.58	10.13	10.13	9.59	11.17	17.86	10.88	14.67	10.99	16.15	16.15	14.85	13.05	15.08	11.95	14.59	14.2	11.08	15.17	14.61	10.47	14.62	15.03	10.09	14.6	17.01	13.58	10.51	10.78	14.98	10.38	14.22	14.95	14.56	11.33	16.04	15.27
2.44142	1.28772	0.21789	0.736547	1.39776	976.586	45.1	20.19	13.77	18.64	18.82	13.95	19.15	17.64	18.11	19.19	17.32	15.48	18.68	14.51	18.84	18.8	15.12	14.64	14.1	14.17	20.12	20.3	19.24	18.87	14.4	16.07	19.64	14.11	13.46	14.42	13.56	19.61	18.53	14.04	17.6	19.46	15.1	13.84	13.57	14.84	14.58	14.02	19.28	19.52
0.28139	-1.82935	0.170435	0.700344	1.39657	863.806	41.9	18.87	18.23	9.86	9.71	17.31	9.86	18.47	18.82	9.65	17.52	17.11	13.2	10.25	16.05	17.09	19.32	18.62	10.8	17.58	10.73	19.31	17.46	18.49	18.38	18.5	16.53	17.83	19.5	10.21	17.5	17.53	18.16	19.37	18.78	17.56	17.97	17.66	17.43	17.17	17.84	9.53	17.98	18.28
0.619134	-0.691677	0.0234693	0.438898	1.39628	146.165	40	17.12	14.27	17.09	18.31	17.55	14.25	15.88	17.33	14.98	18.58	15.88	17.94	19.11	16.22	15.96	14.43	17.61	18.63	18.45	16.23	17.67	18.26	17.95	17.21	17.19	19.34	16.19	17.14	18.47	18.15	15.87	16.36	15.86	19.25	16.09	16.78	17.15	16.01	17.15	18.29	16.66	17.78	16.94
0.70195	-0.510559	0.031201	0.454877	1.39604	867.361	432.5	18.19	17.18	15.45	18.81	15.4	15.4	18.36	15.25	15.31	17.44	15.63	17.89	17.71	17.69	16.78	17.03	16.91	18.05	17.17	18.6	17.33	17.48	17.59	18.11	18.08	16.74	18.04	16.92	16.7	17.63	17.18	15.58	17.11	17.54	16.82	15.9	18.39	17.02	17.68	18.01	17.4	17.55	18.43
0.678484	-0.559613	0.349019	0.807518	1.396	1046.15	427.7	17.31	18.08	19.6	18.22	15.29	18.8	16.81	18.47	18.85	17.56	15.52	17.24	18.31	17.93	15.44	18.55	18.06	19.48	18.22	19.72	18.01	17.8	18.69	17.67	17.83	18	17.62	16.05	16.9	18.21	18.95	18.68	18.1	18.21	15.62	18.4	18.29	19	17.61	17.92	17.03	19.21	18.32
1.95062	0.963935	0.208974	0.725971	1.3929	451.323	348.1	22.55	21.72	21.35	19.32	20.82	22.46	21.86	21.86	21.88	19.85	23.37	23.24	21.08	22.49	24.08	22.04	21.16	21.29	21.73	18.98	23.18	22.05	19.91	20.6	18.93	22.36	21.97	21.84	15.56	22.68	21.54	21.48	21.54	23.02	21.69	19	20.85	13.72	22.34	20.35	21.25	21.13	21.86
0.532868	-0.908151	0.321895	0.794027	1.39154	1070.66	432.6	15.4	17.61	20.43	15.19	17.52	19.66	17.99	19.21	15.14	19.92	17.53	19.34	15.49	18.63	15.35	18.14	19.68	20.58	17.01	15.63	18.26	16.5	18.81	18.91	19.88	17.56	18.98	18.35	19	19.8	18.98	19.91	19.05	18.84	15.54	16.73	20.64	19.16	19.06	19.42	18.65	14.83	15.83
1.61107	0.688022	0.205157	0.722593	1.389	818.108	288.2	18.03	16.43	18.17	17.22	16.46	18.23	17.7	14.11	17.33	17.4	19.57	14.49	18.01	18.52	16.61	17.79	17.73	14.28	17.43	15.8	14.49	17	15.26	18.24	15.68	16.92	17.78	16.56	16.8	17.84	18.07	17.01	17.04	17.83	18.62	17.25	15.65	16.68	14.95	15.68	15.44	15.29	15.09
1.43742	0.523484	0.283548	0.789603	1.38754	215.164	221.3	17.54	14.55	16.72	14.82	17.14	16.08	17.83	17.26	17.89	17.56	17.39	17.93	17.57	17.36	17.18	17.57	15.28	14.91	16.82	17.23	16.18	17.34	14.53	16.91	17.26	16.8	16.38	15.73	17.32	17.31	16.23	15.24	14.9	16.59	17.81	15.54	16.15	16.63	16.82	15.19	17.66	17.09	17.65
0.711092	-0.491892	0.346851	0.807281	1.38661	824.717	592.2	14.22	13.57	14.11	13.63	16.27	16.14	15.06	15.92	13.77	14.96	16.51	15.97	14.34	16.11	16.09	16.64	16.52	15.29	17.31	16.02	16.18	14.71	15.63	15.92	15.22	14	15.33	15.5	16.97	15.91	14.09	16.2	15.32	14.71	14.3	14.96	16.39	14.71	14.71	16.32	15.37	15.22	16.62
1.68082	0.749161	0.260082	0.783832	1.38628	306.226	161	16.14	16.33	13.72	16.18	16.2	16.92	14.65	15.92	15.64	16.93	16.45	17.55	16.36	13.7	16.32	14.64	14.02	17.17	17.39	14.35	13.76	14.43	12.77	16.3	13.7	16.62	16.92	15.36	17.63	12.84	13.75	14.45	16.75	16.78	13.88	15.34	13.2	12.86	17.11	14.06	15.84	16.42	15.49
2.33113	1.22103	0.164888	0.694957	1.38586	887.417	289.4	13.22	16.18	17.24	17.8	15.76	18.07	12.7	16.28	16.94	17.34	19.12	15.8	15.77	12.9	17.61	18.34	17.86	12.52	14.38	13.69	13.05	18.66	11.97	13.18	13.05	13.03	12.6	17.02	13.84	12.13	16.14	18.44	12.35	18.69	13.05	14.03	16.88	17.43	17.78	17.4	12.4	11.75	13.69
2.33942	1.22615	0.0741177	0.57658	1.3856	1101.94	303.7	19.07	18.32	19.09	12.27	18.32	18.2	12.61	17.41	17.6	18.49	18.08	18.29	20.43	19.33	18.45	18.53	18	18.9	12.54	20.06	18.87	13.71	17.88	13.11	15.89	17.76	16.85	17.66	14.11	16.36	16.26	17.99	13.41	18.68	14.52	13.98	18.07	19.59	13.78	18.7	12.27	18.49	13.63
0.709652	-0.494817	0.156055	0.691709	1.38555	348.989	240.5	18.26	18.45	18.12	18.44	14.83	17.22	15.74	18.53	18.35	18.38	16.54	18.01	15.19	18.39	18.36	16.95	17.75	18.11	18.68	18.48	18.51	17.88	17.6	18.79	17.94	17.74	18.34	18.61	15.16	18.1	18.14	17.55	18.02	17.21	18.98	18.04	18.02	17.62	18.27	18.68	18.35	18.14	18.43
1.96463	0.974258	0.106676	0.612125	1.38352	1082.69	43.1	19.77	17.94	17.72	17.49	17.67	17.6	18.49	16.06	18.01	16.43	18.34	16.03	17.93	18.7	18.25	18.24	19.69	12.38	17.85	13.49	19.14	13.58	17.66	17.49	18.47	16.42	17.37	16.78	17.25	17.21	19.88	17.26	15.02	16.61	18.12	17.25	17.16	11.71	18.15	18.64	17.35	16.69	19.03
1.81913	0.863247	0.188737	0.707381	1.38326	502.246	348.4	17.21	14.53	16.85	13.3	16.54	17.14	17.85	16.23	13.48	16.89	17.41	17.62	18.07	16.41	17.68	14.72	17.1	14.96	13.59	14.43	16.45	17.58	12.94	17.28	13.81	17.35	16.29	17.1	13.78	18.39	13.85	17.63	16.07	17.53	16.39	14.77	13.27	13.01	17.36	16.52	13.34	16.89	17.05
1.47645	0.562129	0.162684	0.694957	1.38263	283.981	49.8	15.54	16.05	16.01	16.57	16.8	15.73	17.62	13.57	15.19	16.4	16.48	15.37	15.96	15.64	15.81	13.78	15.74	15.15	16.04	13.54	15.96	15.91	15	16.38	15.84	15.4	12.47	12.8	16.11	15.74	15.5	15.81	16.61	14.93	13.85	13.9	14.07	15.89	16.17	16.1	16.04	16.53	16.21
0.699715	-0.515161	0.122488	0.639495	1.38163	560.466	561.4	14.56	13.89	16.65	17.45	17.75	16.61	15.91	15.23	16.27	16.41	17.11	17.09	16.88	15.78	14.51	17.26	16.79	17.23	17.1	14.93	16.96	16.9	16.85	14.52	17.08	16.82	16.97	16.88	17.35	15.95	16.38	16.63	17.26	16.44	16.96	17.37	15.29	16.51	16.78	15.78	14.23	17.94	17.23
2.73685	1.45252	0.166281	0.694957	1.38163	835.402	289.4	18.67	17.16	18.33	11.72	10.63	17.75	17.8	15.91	17.72	15.61	17.63	17.92	16.28	19.37	16.47	17.99	16.35	11.08	11.01	17.75	17.59	18.37	10.38	17.1	16.67	17.34	11.13	16.37	11.25	17.37	14.89	17.08	17.47	18.46	11.43	12.65	16.66	17.23	16.33	16.75	16.79	10.17	12.04
3.62835	1.85931	0.40621	0.826241	1.38147	483.342	314.7	21.73	19.09	17.69	18.6	19.25	18.34	18.45	17.11	18.42	18.23	20.5	21.29	18.75	20.27	22.36	19.46	18.12	19.08	19.59	18.08	18.18	19.73	9.65	19.19	9.71	21.54	20.18	19.96	9.53	19.74	20.09	21.64	19.88	21.23	19.83	10.66	15	8.05	20.63	19.58	19.46	17.34	10.35
1.66993	0.739785	0.0894639	0.603355	1.38067	289.889	362.4	17.19	16.64	17.03	16.58	16.66	16.11	16.25	16.07	17.35	16.79	17.78	17.23	17.09	16.9	17.88	13.52	17.4	14.92	16.87	16.58	18.49	13.3	16.78	18.03	16.1	17.6	17.49	15.88	16.86	11.72	15.42	14.23	16.77	13.38	15.94	16.74	17.23	16.94	13.34	17.8	16.82	17.22	17.29
0.567837	-0.816452	0.0214878	0.414865	1.37998	324.808	47.6	15.37	17.32	16.25	16.4	16.49	19.58	17.29	13.52	16.9	15.06	16.94	13.91	14.2	16.86	17.96	17.38	16.36	16.06	20.58	19.01	17.61	17.54	15.14	17.22	17.24	17.66	15.99	17.89	13.97	15.22	15.38	17.08	15.54	17.52	17.95	19.17	16.9	17.55	15.35	18.18	19.1	17.54	14.69
0.547432	-0.869247	0.0255547	0.448193	1.37975	473.324	495.9	16.43	12.27	11.69	15.46	15.67	15.35	16.45	12.93	14.96	15.95	12.4	16.55	14.05	12.97	12.02	17.11	12.29	14.94	15.27	16.34	16.02	16.28	15.65	12.17	15.76	14.93	13.79	15.1	15.57	11.22	14.08	17.93	16.08	14.9	16.33	13.11	15.68	16.68	12.79	15.35	17.14	14.7	15.9
2.30683	1.20591	0.267709	0.786816	1.37764	852.399	374.4	12.21	17.1	15.65	15.95	11.1	18.01	16.03	12.2	17.25	17.61	18.04	18.76	17.99	11.97	17.48	16.69	12.37	15.38	15.75	15.88	15.61	18.35	16.36	12.27	12.1	15.14	16.39	16.44	11.92	11.25	14.31	13.08	11.29	15.79	12.04	13.18	18.81	14.61	12.87	16.53	16.7	15.31	12.76
1.57313	0.653634	0.339912	0.804651	1.37745	122.06	294.6	18.17	17.64	18.28	18.63	18.35	15.52	17.81	17.58	17.73	17.66	18.27	18.49	18.16	16.54	18.21	19.46	17.75	18.26	15.49	18.48	15.69	15.83	15.19	18.14	18.47	18.35	17.91	18.6	15.77	15.12	18.3	15.65	15.44	18.36	16.92	17.21	18.26	17.43	18.48	15.7	15.51	15.2	18.59
1.67874	0.747376	0.28956	0.789603	1.37572	488.27	347.7	20.18	19.38	18.98	17.82	18.54	20.13	19.63	19.65	19.22	17.25	21.24	20.59	19.33	19.68	21.31	20.05	18.94	18.8	19.7	18.05	20.23	20.29	16.76	18.47	18.26	19.72	19.78	19.4	15.18	20.3	18.6	19.18	19.32	20.48	19.35	17.69	17.95	13.25	19.24	17.84	19.03	19.08	19.72
1.55232	0.63443	0.131218	0.657141	1.37471	927.619	577.5	17.09	19.2	20	19.3	16.99	18.96	19.81	19.1	19.73	16.81	18.39	19.83	19.57	19.29	19.69	19.86	18.22	16.79	18.98	18.71	17.12	19.81	20.48	19.13	19.67	16.76	16.79	16.75	17.18	19.13	19.25	17.73	19.28	20.03	19.81	19.22	18.41	16.69	19.37	16.97	18.41	16.75	17.19
0.629238	-0.668323	0.0499758	0.536494	1.3718	302.216	322.1	18.9	18.14	15.96	15.88	20.5	15.87	19.11	15.75	18.39	15.59	16.06	18.79	18.59	18.27	18.68	16.54	16.14	18.95	18.72	17.59	18.23	19.03	18.59	16.02	18.57	18.09	17.85	18.46	16.15	18.03	19.25	19.24	19.23	17.9	18.94	18.45	16.73	19.58	19.15	18.02	19.53	17.92	20.19
0.642852	-0.637441	0.0510778	0.539833	1.37158	201.991	548.3	18.77	17.52	18.52	15.49	15.48	15.47	17.29	15.33	15.39	18.52	18.71	15.57	15.78	17.73	17.17	16.19	18.79	18.21	18.23	18.58	18.19	15.8	18.5	16.63	19.16	15.4	17.34	18.14	15.71	17.16	17.56	18.58	15.41	17.98	15.82	18.75	17.36	16.48	18.21	17.76	19.08	16.62	17.8
0.49594	-1.01176	0.107609	0.612125	1.3711	610.81	39.8	16.35	17.38	17.4	11.27	17.07	11.47	16.6	15.19	11.27	10.8	16.42	16.19	15.67	15.93	17.72	15.8	16.16	17.77	11.53	16.54	16.44	16.48	16.7	16.22	16.52	17.83	15.36	16.36	17.76	17.18	16.09	16.82	16.84	16.1	16.73	14.3	18.09	16.11	16.79	15.92	12.36	16.57	17.24
0.663719	-0.591355	0.0453759	0.516235	1.37093	532.965	42.4	19.45	19.17	18.35	19.34	19.14	17.56	18.68	18.42	15.72	18.12	18.18	17.38	17.84	14.73	17.89	15.55	19.65	18.66	18.86	19.76	18.87	18.01	18.89	19.78	18.59	18.91	18.79	19.83	18.15	18.33	19.47	17.94	17.82	18.41	19.76	17.58	19.36	18.49	18.37	18.8	19.41	19.4	15.43
0.618682	-0.692731	0.400223	0.823262	1.36997	1042.19	431	16.89	17.61	18.7	18.36	16.78	18.89	15.97	17.66	18.55	16.82	14.36	14.03	17.84	16.84	14.13	18.19	18.45	18.79	17.07	18.32	17.49	14.65	18.93	18.25	17.44	17.94	14.82	16.32	17.2	17.7	17.85	17.5	17.69	16.17	18.71	14.93	18.46	17.39	18.69	17.53	17.1	18.51	18.54
1.64699	0.719828	0.108224	0.612575	1.36813	444.293	336.6	14.55	17.75	16.43	17.63	17.83	17.26	16.92	17.51	17.72	17.85	18.48	18.1	17.58	17.26	18.2	18.1	17.34	17.26	18.15	14.92	17.76	18.33	16.66	18.38	17.26	15.29	17.57	17.69	18.31	13.67	16.84	14.92	17.71	13.85	17.92	17.3	14	16.52	14.93	18.3	17.54	13.75	15.08
0.649566	-0.622452	0.280201	0.789317	1.36678	491.797	471.9	15.74	15.67	15.59	13.4	13.86	15.51	14.99	15.14	15.36	11.77	13.17	12.63	15.7	16.02	12.86	13.81	15.87	16.13	14.71	16.4	16.38	13.64	15.32	14.5	12.93	15.47	13.45	14.21	16.24	15.31	14.91	16.09	16.06	15.18	12.88	17.24	15.07	15.26	13.7	15.68	15.48	14.67	16.37
1.53269	0.616065	0.0548313	0.55007	1.36525	197.117	298.6	18.07	17.96	17.32	18.15	18.02	18.02	17.84	17.9	18.04	17.39	17.95	18.4	17.51	14.36	17.64	16.44	18.36	17.22	18.1	17.64	18.3	14.97	17.91	17.17	17.84	14.29	17.28	13.75	15.64	16.88	17.49	14.95	17.86	17.3	17.94	17.79	17.28	17.5	17.58	14.72	17.45	17.7	18.68
0.285348	-1.8092	0.0820146	0.59444	1.36192	797.574	370	18.79	19.08	10.47	18.35	9.82	10.35	19.63	19.82	10.28	17.16	11.43	11.81	19.76	17.79	11.13	17.16	17.4	18.38	18.53	19.11	18.31	17.52	17.85	11.23	18.08	17.81	19.61	20.44	17.93	14.48	17.44	16.98	15.95	17.75	10.92	11.95	10.51	17.69	11.55	11.4	18.63	18.65	19.42
1.41759	0.503441	0.351385	0.808303	1.36148	304.299	353.5	18.79	19.22	19.55	18.62	19.47	18.51	20.54	19.7	19.17	19.37	16.86	19.04	18.84	19.04	20.03	20.31	17.92	20.25	18.28	19.43	18.68	19.5	18.62	18.14	19.05	18.51	15.43	19.52	19.08	19.02	18.37	19.97	17.17	17.96	19.01	19.39	17.69	17.35	18.03	19.46	18.68	16.97	18.99
2.38509	1.25404	0.279533	0.789317	1.35999	378.056	206.9	17.15	10.92	11.1	16.62	15.61	10.92	16.27	15.3	11.81	16.37	14.79	16.36	16.32	17.05	16.84	12.29	11.72	14.94	16.57	12.28	16.3	12.35	16.9	11.81	15.49	15.02	11.19	16.62	16.05	10.9	16.77	12.55	16.83	14.16	14.07	12.7	10.94	10.41	17.37	12.05	17.66	10.21	12.13
1.38908	0.474129	0.148777	0.683165	1.35699	330.244	335.1	15.78	17.21	18.58	17.9	18.82	17.42	19.15	18.16	16.64	17.06	17.87	17.59	17.8	18.05	18.04	17.22	16.98	17.17	18.11	15.99	17.66	18.05	16.71	17.98	15.67	17.38	16.47	17.72	18.66	17.76	15.59	18.46	17.97	17.59	15.96	17.85	16.73	18.5	15.97	15.79	18.26	17.03	16.15
0.590206	-0.76071	0.113957	0.61785	1.35653	1032.77	42	18.4	15.22	15.59	16.54	18.03	18.16	18.9	18.42	18.47	15.17	20.42	15.62	15.82	18.59	18.82	20.09	18.73	15.5	15.51	15.9	18.94	19.98	19	18.43	18.74	19.38	18.19	19.15	15.78	18.61	18.25	19.14	19	18.91	18.98	19.59	18.09	18.66	17.8	19.27	19.7	17.58	16.08
0.582176	-0.780473	0.191155	0.707381	1.35648	224.128	320.7	14.3	14.53	14.06	13.99	14.42	15.89	12.44	12.4	13.69	11.31	11.95	13	14.67	11.52	15.61	12.25	14.67	16.35	15.57	14.88	14.16	12.29	15.65	14.91	15.64	14.02	13.64	13.93	15.26	10.83	14.52	15.07	14.05	14.65	15.13	15.3	10.92	14.62	16.48	13.52	14.38	13.86	17.63
1.4034	0.488925	0.0403371	0.494698	1.35638	579.269	578.9	13.6	15.87	15.61	14.37	14.54	15.6	14.97	15.45	15.82	15.93	15.77	16.15	16.33	13.46	16.13	14.4	15.47	13.22	13.17	14.17	15.9	14.25	15.2	15.43	13.48	15.22	14.23	14.96	15.39	15.76	13.48	14.29	16.97	14.08	13.64	15.9	14.11	15.44	15.98	15.74	15.69	15.22	14.23
0.709535	-0.495054	0.315348	0.792819	1.35392	1057.66	430.4	18.64	18.44	20.5	18.98	17.43	18.54	17.99	19.17	19.74	18.59	17	18.46	19.68	19.04	16.1	18.56	19.45	20.68	18.59	20.36	17.91	17.96	19.38	19.01	19.57	18.02	18.15	17.74	18.42	19.63	19.57	19.68	18.98	18.57	17.31	18.64	19.85	19.51	18.5	19.16	18.04	20.17	19.93
2.0211	1.01514	0.0587992	0.561354	1.35316	1274.5	297.9	17.04	16.45	17.19	13.98	17.46	18.46	18.48	18.53	14.06	18.28	18.8	18.81	19.14	19.5	15.41	17.71	17.64	18.64	18.72	18.47	19	19.16	17.98	14.42	18.27	19.15	19.42	16.83	14.46	13.58	14.29	17.61	14.06	13.74	14.56	15.11	13.87	18.99	16.19	16.49	14.05	17.26	15
0.706559	-0.501118	0.327884	0.794027	1.35224	260.639	390.8	16.22	14.58	16.49	15.28	14.6	17.5	15.7	15.88	16.45	14.75	15.92	15.92	15.86	16.65	13.33	16.93	17.76	15.95	14.02	16.48	15.77	16.1	15.57	15.53	16.8	15.14	17.32	14.7	15.7	14.58	17.13	16.46	17.29	16.75	14.97	15.71	17.09	16.16	16.19	16.43	15.34	16.51	17.32
0.503425	-0.990151	0.151636	0.684078	1.35082	688.415	483.8	15.11	18.75	13.43	12.95	12.9	17.6	19.61	12.93	16.38	17.11	18.33	13.43	13.67	17.3	17.88	19.67	16.37	16.43	17.55	17.55	18.13	19.2	13.83	17.13	18.07	17.55	17.06	17.59	18.09	15.89	16.81	16.62	17.08	12.85	17.47	17.16	15.86	17.29	17.46	15.2	18.24	16.77	17.9
1.4576	0.543591	0.302108	0.792819	1.35029	293.162	575.6	19.17	18.87	17.39	17.72	17.13	17.18	15.29	18.12	17.36	18.04	17.04	18.02	18.11	15.57	15.71	16.26	17.7	17.57	17.58	15.92	17.38	18.88	15.22	15.69	15.62	17.27	16.59	16.34	18.03	17.41	15.52	16.9	16.85	18.32	18.06	16.02	17.25	15.23	15.93	15.74	17.52	17.78	16.09
1.36847	0.452559	0.204353	0.722593	1.34973	391.145	351.3	18.08	16.95	17.64	17.52	17.8	16.97	17.51	17.41	18.02	17.44	17.8	17.54	17.32	17.28	17.66	13.3	17.61	17.28	17.59	17.69	17.82	17.85	17.13	16.53	17.62	17.13	17.27	17.41	18.04	16.56	17.76	15.84	17.65	17.16	17.97	16.53	17.3	17.35	14.03	16.8	17.62	17.25	17.56
2.0066	1.00475	0.363631	0.811688	1.34931	919.923	286	18.27	18.26	16.94	17.54	17.66	17.39	18.67	13.33	18.17	16.58	18.44	18.65	18.81	18.65	13.9	18.33	16.96	18.64	13.58	18.95	18.85	19.18	14.2	13.95	13.8	18.34	19.7	18.75	16.39	14.51	17.8	17.98	13.42	18.12	15.12	17.31	17.5	15.71	14.53	17.45	16.36	17.12	14.57
1.38736	0.472344	0.181359	0.703149	1.34902	800.446	415.9	18.94	18.65	19.19	19.04	17.88	18.89	18.86	18.79	19.42	18.8	18.75	18.73	18.8	19.14	18.31	19.12	18.83	14.63	18.52	17.86	18.79	18.64	18.44	19.09	18.77	18.59	18.64	18.48	18.62	18.2	15.68	18.7	18.66	18.72	18.63	18.73	18.55	18.47	19.31	18.8	18.39	18.87	15.36
0.617456	-0.695591	0.0856979	0.597324	1.34755	1121.75	41.7	14.63	18.5	14.48	17.42	18.43	17.37	18.32	18	16.27	18.14	18.59	19.39	14.69	17.53	18.44	19.18	19.71	18.8	17.75	18.94	19.6	19.36	17.17	19.11	16.85	18.76	18.05	17.92	19.38	15.04	18.47	17.28	18.1	19.89	18.57	17.7	18.59	17.25	17.62	17.19	18.57	17.63	17.66
1.49231	0.577548	0.222413	0.743767	1.34744	815.515	441.5	17.2	16.1	17.48	17.39	16.32	17.05	16.85	18.45	17.37	18.66	18.09	17.18	17.04	16.99	17.24	17.45	13.46	18.47	16.37	16.97	17.05	17.72	15.85	17.92	17.07	16.84	17.62	16.95	14.09	15.24	16.98	17.14	15.19	17.38	17.7	17.43	16.53	17.72	18.1	17.68	17	16.6	17.44
0.70349	-0.507398	0.21707	0.736547	1.34727	376.195	396.8	19.1	19.76	16.56	18.65	16.57	19.01	18.92	19.45	19.01	16.34	17.77	16.62	19.49	18.74	16.72	18.7	16.68	19.69	19	19.71	18.81	18.98	19.06	18.41	18.93	19.28	18.88	17.44	16.79	18.98	19.18	18.87	19.3	17.38	18.87	18.87	18.47	18.8	19.42	18.81	19.14	18.86	19.14
1.92943	0.948172	0.0444638	0.511585	1.34682	788.985	77.7	17.01	17.27	15.6	16.43	14.56	17.04	12.48	16.24	15.66	15.67	16.19	16.8	17.24	12.7	17.21	13.75	16.97	17.49	16.59	13.47	12.85	13.56	16.68	16.74	12.84	16.67	15.35	11.25	16.38	11.91	17.27	16.32	13.2	16.24	12.8	13.87	12.21	16.18	13.62	13.26	16.25	16.27	16.98
2.18256	1.12602	0.243972	0.76757	1.34612	403.902	38.7	17.36	14.62	15.35	14.92	15.83	13.12	17.38	15.6	16.3	15.34	15.81	18.79	16.73	11.16	15.64	11.97	11.38	15.11	10.78	14.78	11.29	17.53	14.6	18.12	15.24	15.05	15.24	13.95	15.56	14.73	18.37	16.64	14.97	15.25	11.08	13.28	15.5	16.81	11.86	11.68	17.75	18.39	11.71
0.529905	-0.916194	0.0924354	0.607404	1.34522	228.159	287.7	16.28	15.22	17.73	16.82	17.88	16.62	16.2	16.7	12.42	11.9	16.73	16.66	13.05	17.28	13.08	17.75	17.12	16.96	17.19	14.5	18.23	18.7	17.81	16.93	17.59	17.06	17.51	17.01	15.85	16.85	18.15	16.29	12.41	16.89	17.85	17.39	16.61	12.01	13.86	13.45	18.16	16.73	17.33
1.50256	0.587419	0.174817	0.703149	1.34522	325.283	352	17.9	16.65	17.6	15.91	17.07	14.63	16.62	19.1	17.57	18.05	16.69	16.79	16.41	15.86	15.15	17.02	15.87	16	14.71	15.28	16.14	16.55	16.67	12.93	17.14	15.52	15.51	16.17	17.16	16.76	15.86	16.54	15.78	15.49	16.8	15.93	15.85	15.84	14.4	16.86	16.95	15.32	19.28
0.346344	-1.52972	0.405516	0.826035	1.34458	1498	418.5	19.12	18.46	20.23	19.37	18.76	19.54	18.5	19.02	18.92	9.21	11.04	10.63	19.9	19.02	10.86	18.48	18.36	19.09	17.52	18.44	18.39	11.33	18.95	19.01	19.49	10.9	19.48	18.46	20.22	19.86	19.29	18.93	18.89	18.94	19.3	12.89	19.29	19.86	18.7	18.38	18.68	19.36	19.9
0.642948	-0.637226	0.362745	0.811688	1.34315	545.34	395.2	22.2	24.96	21.93	22.15	22.17	25.25	23.98	21.76	25.25	24.81	24.38	24.65	25.05	24.65	23.45	25.13	25.05	25.25	25.25	25.25	23.37	24.11	25.05	24.73	22.09	24.11	24.96	24.96	25.25	25.25	25.37	24.96	25.05	24.51	22.37	22.23	25.05	26.06	21.96	24.25	24.18	25.37	25.25
0.700142	-0.51428	0.0286613	0.448193	1.34229	96.5145	359.8	18.24	17.82	17.21	17.49	15.97	15.33	17.59	15.01	13.95	18.17	18.3	17.43	16.35	16.95	16.15	16.92	18.13	17.08	17.66	17.16	17.47	18.22	17.13	18.66	17.05	17.46	16.51	16.38	17.44	18.31	17.07	15.86	18.08	18.16	17.69	17.76	18.13	17.29	17.41	17.8	17.91	17.04	16.82
1.81298	0.858366	0.252537	0.779338	1.34074	986.386	300.4	18.48	17.94	16.78	13.76	15.12	15.2	16.99	13.77	18.15	17.31	17.67	16.95	18.32	17.8	17.45	18.13	16.93	16.37	14.02	17.51	14.2	17.67	16.77	17.73	16.89	18.12	18.63	16.29	14.28	14.65	14.16	14.77	13.85	17.87	17.29	15.03	13.7	13.45	17.92	14.48	13.88	16.43	18.13
0.714076	-0.485849	0.249737	0.775405	1.34049	339.25	363.8	16.17	16.67	16.19	14.58	16.91	15.57	15.97	16.93	16.14	15.02	14.16	16.6	16.53	16.47	16.52	16.99	16.5	16.8	17.38	16.63	15.88	16.05	15.92	18.22	17.35	15.83	17.53	16.58	16.82	15.92	16.95	16.99	15.97	13.11	18.4	14.77	16.22	15.94	16.47	16.94	17.27	15.69	16.78
0.514908	-0.957613	0.042702	0.504184	1.34032	289.221	285.1	18.15	13.72	14.24	18.05	17.78	17	19.69	13.83	18.58	16.89	19.44	14.28	14.47	17.47	18.17	18.98	14.6	16.73	14.1	17.5	18.34	19.25	16.93	15.32	19.5	18.1	19.52	18.35	19.82	16.39	19.53	18.45	17.73	18.57	18.27	16.79	13.77	18.49	18.43	17.72	17.87	18.25	20.75
1.54491	0.627527	0.0761055	0.585974	1.33943	629.391	312.6	18.94	18.75	18.08	19.52	17.88	19.11	18.05	18.26	17.39	18.81	19.48	19.06	18.2	17.74	19.33	15.06	17.6	18.41	17.65	18.82	17.6	18.12	18.4	19.05	17.81	19.16	18.88	18.56	18.43	18.7	17.97	20.18	18.63	12.64	16.05	17.97	17.81	17.19	18.32	17.57	18.96	18.02	18.9
1.81834	0.862624	0.340971	0.805311	1.3393	305.303	353.6	16.35	16.77	17.36	16.03	16.22	16.05	18.33	16.85	16.88	16.13	14.11	16.37	16.7	16.18	17.49	18	15.69	18.27	15.88	17.23	16.18	17.19	15.97	14.3	16.98	15.94	11.38	16.81	16.59	16.19	15.62	17.65	14.35	13.7	15.92	16.9	15.04	11.62	12.48	16.92	16.14	10.41	16.88
2.49979	1.32181	0.325028	0.794027	1.3371	506.109	374.4	15.13	14.6	16.86	16.1	12.94	12.65	12.94	9.82	15.78	16.43	9.59	15.72	15.72	13.75	15.21	10.38	13.59	15.02	14.61	15.21	13.85	10.28	14.98	9.65	13.51	14.74	14.34	14.12	13.35	8.63	9.42	10.54	9.35	9.21	17.06	15.74	9.53	13.78	10.32	17.44	15.02	14.94	10.13
0.515192	-0.956817	0.196693	0.715654	1.33599	263.019	51.4	14.96	15.91	17.13	15.03	15.24	14.91	10.13	15.35	15.35	15.32	10.69	14.82	10.43	11.49	15.62	15.37	16.1	13.53	16.96	15.76	15.82	15.55	14.94	15.42	15.33	15.6	15.35	8.05	15	14.97	14.77	11.41	15.05	14.84	15.32	17.53	15.55	16.02	16.21	14.22	15.7	15.83	15.76
1.54367	0.626366	0.0846874	0.597324	1.33574	429.239	510.6	17.68	16.65	17.26	13.22	16.63	16.86	17.1	16.09	16.95	16.63	17.17	17.91	17.15	16.64	17.27	14.7	16.5	16.68	17.11	17.32	17.5	15.15	16.83	13.92	17.28	16.98	15.75	12.69	16.97	17.12	16.52	14.48	16.22	13.06	16.72	15.84	16.44	15.91	16.59	14.09	16.7	16.82	16.58
4.19111	2.06733	0.202151	0.722593	1.33294	430.243	312.2	16	7.52	17.51	15.98	16.82	17.82	16.66	15.57	7.37	16.19	8.92	16.99	16.4	14.49	7.52	8.73	8.05	12.47	12.76	17.04	15.87	8.92	7.16	17.23	14.14	7.93	7.93	5.85	16.84	7.16	15.42	14.15	8.05	7.16	15.61	9.15	10.47	16.28	15.74	12.49	17.59	5.85	8.63
0.502503	-0.992796	0.0975245	0.61062	1.33274	965.212	51.3	17.47	17.63	14.11	17.57	12.45	17.17	17.39	12.45	16.92	12.13	18.32	13.08	13.28	17.63	16.9	17.14	13.55	12.85	12.88	18.23	17.13	17.9	17.58	17.01	17.58	17.64	18.04	18.2	13.03	17.18	18.24	16.98	17.55	16.94	16.76	14.24	18.06	17.82	16.93	16.86	17.63	17.11	16.11
0.648512	-0.624796	0.146598	0.679296	1.33194	230.982	223.4	16.35	16.69	14.54	17.26	14.19	16.75	17.55	16.84	14.31	17.51	16.88	17.68	18.6	17.53	17.99	15.31	19.18	17.14	17.53	17.88	15.65	15.01	17.72	17.5	17.43	18.39	18.4	13.84	17.2	15.77	17.46	17.9	17.73	16.89	18.58	18.29	16.98	17.65	18.11	16.81	18.06	16.71	18.34
0.715259	-0.483462	0.0908142	0.603504	1.33194	688.521	460.7	17.58	18.87	17.86	18.53	17.6	18.04	17.5	17.5	17.52	17.8	15.37	14.22	17.6	17.69	17.81	17.83	16.44	19.03	17.86	17.65	18.03	18.09	18.18	18.32	18.69	17.01	16.54	18.72	18.63	18.06	18.12	19.64	19.32	18.03	18.53	17.84	16.5	15.95	17.95	17.46	18.21	17.43	18.57
1.4155	0.501312	0.0791598	0.591445	1.33121	580.361	446.9	18.76	17.63	18.84	18.7	19.44	18.45	20.38	19.74	18.52	19.56	18.95	19.72	18.73	20.14	18.5	20.21	19.08	18.45	19.08	15.33	20.01	19.45	19.02	19.26	19.29	19.37	18.65	19.7	19.99	17.59	17.5	17.84	18.67	18.02	18.38	18.77	18.36	18.31	17.47	16.09	19.16	18.65	19.49
0.655509	-0.609312	0.361336	0.811688	1.3303	570.354	404	23.04	23.87	23.31	23.79	20.43	24.51	23.26	24.18	23.94	20.24	20.4	23.31	23.35	24.25	22.99	24.18	24.21	24.34	23.84	24.58	23.84	22.96	23.98	23.48	23.62	23.82	24.08	24.04	20.55	23.73	24.58	24.18	24.25	23.66	21.57	23.4	24.47	24.65	23.37	23.35	22.88	23.82	24.25
0.623347	-0.681892	0.407949	0.82742	1.32914	1279.81	421.5	17.99	14.62	19.36	17.9	16.82	18.05	18.4	18.8	19.52	17.67	15.27	16.81	18.52	17.8	15.14	18.5	18.95	19.92	15	18.75	20.24	15.42	18.61	19.15	18.19	18.25	17.99	17.96	18.11	18.64	18.57	18.01	19.43	18.37	15.32	17.69	17.56	18.43	17.63	18.19	16.09	19.04	19.55
0.64742	-0.627226	0.167239	0.694957	1.32906	795.977	412.7	17.44	18.27	20.67	18.03	19.17	19.91	17.83	15.99	16.08	18.85	18.91	16.19	19.73	18.81	17.36	18.65	16.34	20	18.23	20.14	18.96	18.08	19.59	20.05	19.11	19.13	18.93	18.54	16.39	19.49	19.94	19.25	19.65	18.54	16.45	18.84	19.64	19.69	19.22	19.6	17.69	19.21	19.63
0.671261	-0.575054	0.280306	0.789317	1.32854	281.155	431.9	15.61	15.44	17.58	16.46	15.6	18.31	15.22	18.39	16.31	16.97	13.03	15.21	17.23	16.64	15.5	16.4	17.29	17.3	15.66	17.41	13.65	18.02	17.09	15.87	17.55	15.56	17.34	16.72	17	16.65	17.54	15.96	17.71	16.16	16.86	17.25	16.14	16.2	16.82	17.87	15.93	16.26	18.78
0.554132	-0.851699	0.631433	0.915968	1.32828	491.292	371.5	15.69	16.4	16.71	12.46	17.46	17.49	15.93	17.73	17.65	11.05	15.55	17.36	16.99	16.56	12.23	17.81	16.92	17.62	14.56	17.66	16.85	13.05	18.51	18.54	12.34	16.28	16.99	14.6	16.17	17.29	17.87	17.03	16.39	16.62	15.65	16.64	17.05	17.39	16.4	17.34	16.08	17.15	17.57
0.651797	-0.617505	0.358523	0.811688	1.32815	1239.34	417.7	19.12	18.86	20.37	19.62	16.13	19.23	18.19	19.73	20.1	18.28	19.43	15.22	19.34	20.08	15.26	18.5	19.33	19.85	18.91	20.03	19.41	18.32	19.78	19.15	18.54	19.02	18.42	19.22	18.89	20.33	19.88	19.72	19.04	18.91	15.41	19.16	19.25	19.35	20.59	19.88	19.44	19.13	19.08
2.80902	1.49006	0.12014	0.632049	1.32561	489.299	315	12.12	17.65	16.89	15.91	17.16	17.47	11.47	16.39	17.59	14.63	18.95	19.53	17.65	11.88	20.59	13.01	17.05	17.84	19.02	12.72	12.06	12.84	11.95	17.39	12.02	18.15	18.48	17.9	11.86	18.21	12.09	19.05	18.37	19.22	11.98	13.13	11.43	10.9	12.81	12.5	18.04	17.02	12.67
0.527785	-0.921978	0.163865	0.694957	1.32522	1059.66	430	16.73	13.64	19.39	17.8	13.82	13.84	17.63	19.15	19.66	18.65	14.43	14.17	19.12	17.75	14.25	18.34	19.2	18.62	18.32	18.57	14.15	18.4	18.7	17.46	18.51	17.44	15.34	17.23	16.25	16.9	14.12	18.94	17.15	16.73	15.39	15	17.32	17.63	18.33	17.76	18.35	18.58	19.31
0.683784	-0.548387	0.0657343	0.571008	1.32467	1004.67	44	20.08	17.23	19.37	18.14	19.8	17.34	18.26	18.74	18.76	16.28	19.07	16.57	17.34	19.35	19.07	17.64	19.32	19.58	17.07	17.81	18.52	20.14	18.05	19.23	20.17	20.08	18.28	20.22	17.7	18.47	19.64	18.83	17.34	18.99	19.85	17.22	20.09	19.41	19.25	19.1	17.23	18.95	18.25
0.64915	-0.623376	0.377655	0.817691	1.3212	537.167	387.9	16.28	16.29	15.74	14.6	13.74	16.8	16.59	17.31	16.55	16.69	14.83	17.6	16.72	17.45	15.74	17.84	17.55	17.67	15.85	17.52	15.68	17.69	17.7	16.3	16.92	17.26	18.55	16.11	12.23	16.77	18.16	16.58	18.51	17.45	16.18	15.06	17.93	17.84	18.17	15.41	15.87	16	17.54
0.714215	-0.48557	0.171789	0.701386	1.32088	298.796	46.6	16.93	16.85	17.57	18.24	16.55	17.22	18.42	16.27	16.99	17.06	18.05	16.63	18.47	17.94	15.52	16.08	18.2	18.1	18.12	18.24	17.98	17.45	17.71	17.93	17.51	17	17.66	17.3	18.42	17.42	18.17	18.61	17.82	17.23	19.5	18.68	16.93	16.55	19.28	16.65	17.72	17.52	20.23
0.5155	-0.955957	0.123033	0.641241	1.3206	91.054	374.6	15.28	12.06	16.64	17.29	11.78	12.22	16.87	16.95	17.46	16.36	13.02	16.56	12.83	12.67	17.69	13.7	18.05	16.55	12.35	13.4	16.88	15.03	17.13	12.86	16.01	16.86	16.12	16.48	17.42	17.05	15.31	16.49	16.43	16.36	17.78	14.57	17.65	16.37	15.6	18.08	16.26	11.52	16.91
0.443376	-1.1734	0.431048	0.840861	1.32057	1038.66	396.7	13.52	17.42	13.28	18.46	17.85	19.04	18.12	18.96	18.84	12.48	13.76	13.3	17.94	18.72	13.48	18.18	18.7	19.6	18.09	19.59	13.42	14.17	18.81	17.29	18.43	18.39	17.43	12.17	14.47	18.95	19.38	18.95	18.21	17.61	13.51	14.41	18.86	19.25	14.22	18.06	17.72	19.05	19.28
0.707782	-0.498624	0.137334	0.664963	1.31902	159.157	352.7	16.52	17.51	15.79	17.09	13.41	15.78	16.8	15.12	16.08	14.84	15.86	16.14	16.67	16.61	16.42	17.17	15.43	16.42	16.53	16.27	16.79	17.87	16.19	16.62	16.92	16.38	16.3	17.83	17.02	19.18	15.58	15.9	16.57	15.55	16.83	17.26	15.31	15.53	18.61	16.83	15.9	15.99	17.76
0.524624	-0.930645	0.082567	0.59444	1.31682	754.533	591.5	16.23	14.1	15.48	11.52	15.25	10.76	15.04	15.17	10.61	10.25	11.72	14.52	11.4	16.05	11.4	14.93	15.35	16.27	10.88	16.15	14.89	14.81	15.3	11.53	14.87	14.9	14.29	14.57	14.23	10.54	14.28	15.37	13.98	14.96	15.72	15.51	10.76	14.57	11.97	11.8	14.46	15.4	15.48
1.48233	0.567871	0.106585	0.612125	1.31676	284.184	266.6	15.69	18.03	18.07	18.52	17.93	16.54	18.29	18.03	17.94	17.88	18.43	18.36	18.36	17.63	15.71	18.28	17.81	18.21	15.53	15.91	18.28	15.85	15.21	15.68	15.6	18.25	17.85	17.84	15.79	18.18	18.03	17.15	18.09	15.25	18.28	16.01	17.76	18.24	18.28	15.73	15.54	17.4	16.09
0.714737	-0.484516	0.0902361	0.603355	1.31408	550.097	55.3	16.29	17.02	17.38	15.76	15.19	14.89	14.3	16.91	14.64	15.86	14.09	17.11	16.97	16.19	16.2	15.92	17.34	15.68	16.68	17.43	17.23	17.32	16.78	17.12	16.53	16.72	16.34	14.86	16.3	15.81	16.67	14.44	13.28	16.41	17.27	16.75	16.08	16.37	16.72	16.03	16.22	17.11	17.14
0.47989	-1.05923	0.360398	0.811688	1.31267	983.612	391.7	12.96	16.38	13.51	16.42	16.93	18.24	17.46	18.33	17.68	11.63	13.05	16.18	15.81	18.71	12.72	17.12	19.92	18.15	15.8	18.22	18.02	13.53	17.78	12.92	17.07	18.01	15.9	11.19	16.34	18.28	18.16	16.92	16.52	17.23	12.75	18.34	18.32	17.27	13.57	17.29	17.91	17.96	16.91
0.710054	-0.494	0.193204	0.707381	1.31253	909.755	41.5	18.91	16.7	18.21	16.57	16.78	17.82	18.3	18.57	16.27	17.11	14.53	15.6	16.77	17.77	16.08	17.41	17.66	17.75	17.02	19.02	18.79	18.7	18.08	19.04	16.17	17.96	17.4	16.49	18.35	16.81	17.94	18.1	18.17	16.6	17.64	17.18	15	17.14	17.45	16.94	17.4	16.95	17.63
1.62271	0.698409	0.0874582	0.601556	1.3118	178.035	305.8	14.82	17.59	17.5	16.43	14.34	17.77	17.36	17.56	16.58	17.9	17.86	16.45	14.9	18.37	17.48	15.43	17.87	14.54	14.55	18.1	14.73	17.17	17.87	18.28	17.89	14.45	17.2	14.02	14.82	13.95	16.17	17.13	16.9	14.12	15.98	16.89	15.68	14.12	17.97	17.65	17.56	16.63	16.25
0.507728	-0.977871	0.109279	0.612862	1.31084	1130.58	399.2	17.21	14.6	17.03	12.88	16.33	13.07	18.37	18.96	18.02	18.37	13.89	14.45	17.96	16.88	13.57	14.4	19.45	18.82	17.1	17.42	17.95	14.25	17.09	13.64	16.65	18.05	13.14	15.25	13.41	14.35	19.09	17.8	18.22	18.27	17.31	17.26	19.22	17.92	18.53	18.29	17.95	18.56	19.18
0.685233	-0.545333	0.298137	0.792819	1.31023	278.638	375.4	15.49	16.37	17.4	16.14	15.95	16.68	15.79	17.17	16.87	16.21	14.7	17.38	17.56	15.78	13.58	16	17.63	18.23	16.83	17.79	17.05	16.06	18.38	16.18	16.5	16.83	16.5	16.09	15.32	17.38	16.65	16.2	16.6	17.04	13.7	16.09	17.13	17.2	16.01	18.07	16.65	16.77	14.28
0.482666	-1.0509	0.15925	0.694957	1.30994	190.086	307.2	15.63	18.59	15.38	11.47	12.38	18.36	18.68	11.57	17.7	18.03	17	16.47	16.78	12.2	16.79	18.92	15.66	17.85	15.94	15.89	12.25	17.59	17.6	17.51	16.91	14.42	17.18	17.93	15.83	17.82	16.3	18.37	18.59	18.04	15.91	13.35	19.73	17.24	15.35	12.75	18.01	16.94	18.7
1.70324	0.76828	0.0937044	0.61062	1.30851	244.787	48	16.32	18.38	16.39	17	17.61	17.25	18.17	18.45	14.13	16.55	18.82	17.26	18.33	17.12	16.62	16.73	17.16	16.97	18.1	17.65	16.13	16.5	17.16	16.06	17.03	16.43	16.63	12.27	17.14	17.16	18.62	14.28	12.96	17.39	13.61	14.47	13.02	17.91	17.76	18.48	16.6	16.11	17.25
0.483047	-1.04976	0.185484	0.705165	1.30759	957.788	41.4	14.58	14.72	16.79	16.8	18.17	16.06	18.09	18.15	17.21	17.9	12.27	15.87	12.01	14.81	12.78	19.31	19.95	17.73	11.34	12.57	16.95	17.63	18.38	17.04	15.12	17.63	16.04	15.24	16.45	17.45	17.04	19.05	17.78	17.42	18.09	18.99	18.07	18.2	12.63	16.13	17.17	17.21	12.47
1.55931	0.640903	0.030918	0.454877	1.30518	766.054	586.3	12.48	14.82	15.81	14.64	15.52	14.32	13.31	13.9	15.27	15.53	15.88	14.41	13.3	12.37	15.76	13.34	15.16	15.7	16.35	13.08	12.36	13.14	15.58	15.64	12.5	12.45	15.7	14.92	14.91	11.62	12.49	13.39	14.95	14.61	12.33	13.48	11.85	14.63	13.18	12.85	12.75	15.06	14.43
1.68315	0.751161	0.131103	0.657141	1.30332	555.078	50.4	17.69	16.23	17.87	18.25	16.85	16.84	17.89	15.02	13.96	13.5	16.01	17.84	14.48	17.39	16.87	15.08	17.62	17.61	14.11	14.76	16.94	16.93	13.57	16.69	14.27	14.12	16.3	16.77	18.18	13.52	17.53	14.81	16.75	13.66	16.52	16.89	15.89	17.75	17.4	14.52	13.95	13.49	15.93
1.5318	0.615226	0.0538621	0.55007	1.30244	581.363	448.4	17.65	16.1	15.43	17.58	17.97	16.83	18	17.75	17.24	17.75	18	17.97	17.5	16.1	15.11	18.3	16.87	15.96	18.04	13.73	18.13	17.6	17.04	17.09	17.6	17.45	16.52	16.89	17.85	15.91	14.49	16.3	17	16.85	14.09	16.94	15.42	18.4	16.81	13.48	15.79	14.96	18.11
1.67459	0.743806	0.277641	0.789317	1.30235	799.788	41.2	18.87	16.9	17.15	17.04	18.66	17.17	17.7	17.04	15.55	17.95	18.21	16.94	19.44	16.32	17.38	19.39	16.75	16.5	17.43	14.72	17.64	16.55	16.56	16.35	17.99	17.96	17.57	14.6	16.94	17.92	16.72	17.33	18.49	17.66	13.36	17.15	17.98	12.36	14.08	13.7	16.78	18.12	16.58
2.20934	1.14361	0.0323663	0.458999	1.30235	660.371	363.3	18.71	16.47	12.8	15.97	17.45	18.62	12.75	19.13	16.53	19.14	18.55	19.1	14.12	12.94	17.35	13.97	16.74	12.6	12.65	16.48	13.08	13.82	17.42	18.47	13.1	13.06	17.39	16.17	12.85	17.14	17.05	17.02	19.19	17.41	13.1	14.06	15.73	18.77	16.8	16.45	18.73	11.86	13.75
0.538513	-0.892946	0.0698268	0.574409	1.30229	778.259	482.6	16.38	15.83	11.68	11.17	11.01	17	14.96	13.94	11.22	16.03	12.39	16	16.53	15.47	16.52	15.36	14.35	16.04	15.99	16.38	15.32	17.32	15.24	12.16	15.93	14.56	15.59	15.47	17.24	15.08	14	16.84	12.25	15.46	16.94	13.1	15.5	13.75	12.78	15.58	17.17	12.93	17.27
0.635099	-0.654946	0.535217	0.8796	1.30166	1089.68	395.2	16.77	19.01	19.47	18.7	17.81	20.26	18.64	19.87	20.22	17.8	19.25	15.67	19.92	19.72	18.39	19.24	20.13	21.55	19.24	22.03	18.1	18.47	20.17	18.64	19.04	18.88	18.96	18.63	17.21	20.2	21.44	20.84	19.4	18.8	15.9	18.64	20.03	21.51	19.02	18.91	17.54	20.25	20.09
2.28102	1.18968	0.272934	0.786816	1.30039	480.279	316.2	19.68	18.84	13.91	19.53	18.52	19.54	17.55	17.17	18.62	17.13	14.26	19.38	18.84	16.71	19.87	14.81	14.26	18.87	19.54	17.15	13.95	18.54	13.13	17.98	13.93	18.77	20.37	12.9	13.89	14.26	18.44	18.54	13.52	20.76	18.03	14.83	13.36	19.23	19	18.15	13.49	19.09	18.88
1.67601	0.745032	0.0488638	0.532091	1.30037	402.135	574.7	13.45	18	17.79	12.62	16.37	16.41	14.22	17	16.18	17.72	16.07	17.56	17.1	17.13	17.57	16.48	16.97	12.92	16.76	13.95	16.28	16.02	16.17	13.46	13.34	16.1	15.37	15.6	17	16.37	13.3	16.78	16.01	16.54	17.69	16.42	12.83	17.01	14.11	14.5	16.48	16.29	17.07
0.54213	-0.88329	0.271417	0.786816	1.29903	783.466	412	16.36	18.56	19.35	18.89	18.06	14.05	14.03	18.44	18.92	17.37	14.58	15.39	18.44	18.16	14.37	18.88	19.01	19.29	17.88	19.22	14.33	17.1	18.98	18.24	18.43	18.35	16.91	13.52	14.46	19.32	18.94	18.56	18.72	18.75	14.55	15.11	18.58	17.86	18.52	18.84	18.35	19.41	18.94
0.543052	-0.880839	0.311427	0.792819	1.29825	338.341	372.2	15.28	13.76	12.73	13.43	16.03	15.4	15.58	12.81	14.71	11.08	11.36	15.2	15.16	13.09	16.69	15.23	14.28	16.47	14.84	16.42	16.47	11.68	15.01	15.82	16.36	14.77	15.11	15.79	12.44	14.96	16.77	18.5	13.83	10.63	11.85	11.88	16.05	15.34	15.27	15.15	16.4	15.85	17
0.575086	-0.798151	0.426872	0.838076	1.29789	282.631	371.7	11.53	16.57	17.31	15.68	15.77	16.95	15.83	17.66	17.88	16.7	15.67	16.9	17.13	17.34	11.64	16.07	17.95	17.72	16.88	17.45	16.63	17.53	18.23	17.92	16.17	17.85	16.82	15.62	15.99	17.57	17.85	17.67	16.8	15.74	12.58	16.24	17.01	17.83	17.07	16.69	16.11	17.63	12.17
0.468475	-1.09396	0.595273	0.902978	1.2976	512.335	378.2	15.77	20.77	15.69	15.62	18.2	20.46	19.58	20.98	21.86	15.29	15.81	15.72	19.65	19.39	15.77	20.52	21.37	21.13	15.59	22.55	18.61	20.27	20.53	19.06	19.45	19.64	19.65	15.3	15.87	20.93	21.77	20.19	20.33	15.33	15.95	19.67	20.58	21.69	19.14	20.36	17.34	19.68	16.96
1.3659	0.449849	0.232365	0.752396	1.29644	781.807	41.4	17.85	17.75	17.08	17.25	17.82	18.2	17.38	17.27	17.98	17.59	17.5	16.83	18.92	18.25	17.31	16.95	16.72	16.75	16.67	13.88	15.41	18.81	16.81	16.42	17.5	18.27	16.64	17.4	17.41	16.25	17.2	18.79	17.24	17.01	18.18	17.43	16.79	16.89	17.64	17.08	16.41	18.84	18.28
1.86629	0.900172	0.240843	0.764131	1.29553	190.106	172.4	17.16	17.26	14.35	17.34	19.51	18.23	18.7	13.99	14.1	18.29	19.19	17.07	20.32	17.14	17.08	18.57	14.7	16.74	15.73	14.86	15.46	17.33	13.69	17.68	16.19	14.22	17.33	18.19	20.59	16.38	19.49	17.75	17.64	17.79	14.61	15.14	13.93	16.58	14.88	16.2	14.11	17.26	18.68
1.71821	0.780903	0.0599436	0.561654	1.29542	663.45	582	15.9	19.25	19.08	18.22	18.6	19.18	15.5	19.85	19.21	19.13	16.81	18.45	18.9	15.71	19.78	18.96	15.99	18.11	19.04	16.05	15.89	18.74	18.91	15.86	15.74	15.61	19.24	17.91	19.69	15.35	15.67	15.8	19.27	19.14	16.09	16.16	18.59	19.67	16.05	15.86	17.52	19.47	16.22
0.615627	-0.699871	0.306735	0.792819	1.29368	909.548	491.5	14.26	17.06	17.54	17.76	13.8	16.9	17.9	17.29	13.8	13.39	17.13	15.96	14.37	15.74	17.91	15	17.44	17.05	17.95	14.7	17.69	17.58	16.99	17.53	17.77	16.89	17.1	14.63	17.8	16.76	17.02	14.73	17.3	13.5	17.72	14.99	17.8	16.86	17.93	16.09	17.28	17.63	14.85
0.602598	-0.730731	0.227521	0.750771	1.29278	991.674	417.5	28.31	28.31	22.39	28.71	28.31	28.71	28.71	28.71	28.71	27.94	28.71	27.61	28.71	28.71	23.66	28.71	28.71	28.71	28.71	28.31	28.31	28.31	28.71	28.71	28.71	28.71	28.71	28.71	28.71	28.71	28.71	28.71	28.71	28.71	28.31	27.94	28.71	28.71	28.71	28.71	28.71	28.71	30.27
0.663591	-0.591634	0.357159	0.811688	1.29241	1072.17	431.8	17.22	18	19.95	18.3	16.78	17.45	17.38	18.5	19.47	17.97	15.08	17.29	19.09	18.06	14.95	18.08	19.36	20.21	18.62	19.44	18.32	15.26	17.98	18.32	18.48	17.58	17.63	17.9	16.11	17.95	18.48	18.34	19.09	17.81	17.22	18.4	19.19	18.96	17.52	18.31	16.16	19.54	19.73
0.57062	-0.809398	0.163293	0.694957	1.29186	826.465	431.5	16.91	17.27	12.97	18.4	16.42	12.62	16.82	17.26	18.01	17.38	18.07	13.03	17.76	17.29	13.22	16.9	13.48	18.44	17.93	17.61	16.53	13.93	18.41	17.71	17.35	16.11	17.14	17.24	17.23	17.77	17.17	14.68	17.36	16.82	18.05	18.33	18.09	18.04	17.03	18.16	17.64	17.1	18.31
2.51021	1.32781	0.0609266	0.562925	1.29155	378.925	48.7	17.44	20.7	18.65	12.47	18.61	18.07	17.51	17.18	21.8	17.42	17.31	18.44	13.2	21.75	18.58	19.01	14.43	12.76	12.78	13.85	18.69	17.09	21.27	18.03	16.1	13.18	18.14	18.32	17.17	17.73	18.06	14.09	18.35	20.99	18.47	18.44	18.31	18.67	16.82	17.39	12.57	11.99	13.91
0.719612	-0.47471	0.103177	0.610923	1.29074	255.21	327.2	16.01	18	16.86	15.2	18.17	16.16	16.93	16.96	18.14	16.16	16.19	17.01	17.8	16.97	16.4	17.48	17.29	14.09	17.53	16.85	18.12	17.4	17.28	18.12	18.02	16.85	18.04	18.22	18.39	17.26	17.55	17.23	16.52	17.65	17.24	18.07	17.14	15.03	17.77	17.29	15.96	18.3	18.33
0.606537	-0.721333	0.318356	0.794027	1.29034	1136.6	432.9	16.51	16.23	18.17	14.44	15.63	18.5	18.32	17.16	18.43	15.77	17.98	13.42	13.66	16.37	13.59	17.32	17.46	18.52	15.73	18.86	15.98	17.37	17	15.55	16.89	17.17	17.56	15.26	16.66	17.84	18.16	17.94	17.44	18.08	16.08	15.2	17.22	15.63	17.38	16.67	17.54	17.26	18.23
0.656722	-0.606645	0.147491	0.681366	1.28995	475.199	366.3	14.74	15.01	15.05	16.48	14.97	15.18	15.69	14.74	14.21	15.56	15.36	13.4	17.24	17.07	13.51	13.57	15.9	15.23	13.74	15.57	13.96	13.34	15.14	17.13	14.57	14.66	16.5	15.18	15.61	16.78	16.18	17.07	17.11	15.69	16.52	16.07	16.03	17.06	17.32	17.82	16.32	16.4	13.28
0.699214	-0.516194	0.398557	0.823262	1.2897	632.261	464.2	15.67	17.16	17.76	17.48	16.66	17.98	15	17.95	18.4	16.35	16.54	16.53	14.32	17.82	15.15	18.27	18.43	13.91	16.46	18.29	17.26	16.43	17.51	17.41	17.58	16.89	17.53	16.35	17.24	17.46	17.68	17.31	17.65	17.06	16.99	17.29	18.51	18.19	17.12	17.24	17.26	17.58	14.78
1.87541	0.907204	0.10428	0.610923	1.28877	1082.73	41.7	17.57	17.88	17.89	16.71	17.06	17.66	14.72	16.64	17.04	17.02	18.4	17.69	13.41	16.64	18.42	19.45	13.64	12.99	16.88	13.99	17.42	18.11	16.14	19	18.69	15.62	19.2	18.4	18.05	16.03	13.32	16.66	16.74	15.35	13.41	15.94	12.86	14	16.85	17.03	18.09	15.84	14.06
0.746033	-0.422688	0.418488	0.83566	1.28848	276.622	383.6	15.35	16.05	17.5	17.2	16.43	16.51	16.09	17.09	17.21	16.34	15.89	16.78	17.6	16.99	13.82	15.67	17.6	17.77	17.02	17.51	15.74	16.91	17.46	16.51	16.45	17	16.46	16.67	16.44	17.03	17.3	17.09	16.61	16.28	15.64	16.56	17.28	17.33	16.73	16.53	14.6	18.05	18.64
1.74737	0.805183	0.0200297	0.407136	1.28814	916.087	429.3	13.55	17.77	18.59	18.2	16.94	17.94	13.11	17.68	18.56	18.43	17.34	18.13	18.19	18.33	17.2	18.68	16.97	18.78	17.13	14.15	18.34	14.92	17.71	17.63	18.61	17.06	16.77	17.67	17.21	16	18.59	17.1	16.6	16.34	13.57	14.46	15.38	16.92	14.27	13.84	16.86	17.28	14.21
1.97408	0.981183	0.232949	0.752396	1.28744	1182.71	40.1	19.58	17.99	16.8	18.99	18.98	19.16	18.61	18.15	18.23	18.25	18.86	18.04	18.45	17.58	19.03	18.32	11.91	18.07	11.13	18.55	18.63	19.41	17.8	19.32	18.65	18.23	17.93	18.01	17.52	18.6	17.33	18.49	18.9	14.33	18.66	19.31	19.89	19.71	18.07	17.62	17.08	17.09	12.25
1.37595	0.46043	0.102798	0.610923	1.28744	813.617	519.2	15.51	17.02	16.78	17.17	18.33	18.09	15.08	16.58	17.43	16.47	18.31	17.44	16.96	15.37	16.56	17.78	16.84	16.48	16.67	15.73	15.48	16.9	14.98	16.63	15.4	15.26	17.43	16.57	17.07	17.47	15.35	15.52	16.3	17.51	15.68	15.86	16.28	16.87	15.76	15.55	18.38	16.24	15.93
0.523124	-0.934774	0.0741769	0.57658	1.28583	516.142	375.4	16.95	16.81	12.05	13.49	11.45	16.04	15.66	11.69	11.72	17.15	18.86	16.71	15.97	15.63	16.95	16.86	12.77	16.85	17.64	16.23	16.31	15.32	16.68	15.6	17.36	15.32	17.81	15.87	12.24	12.47	15.94	14.87	17.49	16.28	16.68	18.16	15.52	17.59	17.99	16.6	16.1	17.35	16.78
1.54494	0.627548	0.0501478	0.536494	1.28554	594.152	568.4	12.88	14.7	16.23	16.48	15.53	14.87	12.31	15.42	16.01	17.24	15.74	15.85	15	15.25	16.35	15.8	16.45	15.51	15.76	13.34	13.57	13.46	15.04	16.49	12.71	12.76	13.88	15.9	15.9	15.33	12.69	13.66	15.73	13.82	16.24	13.74	14.76	15.1	14.76	13.14	16.16	15.79	13.38
1.62412	0.699656	0.17486	0.703149	1.28544	336.237	311.5	17.46	16.53	16.35	16.15	16.73	16.8	17.36	16.42	17.33	14.9	16.4	15.35	17.31	12.74	16.66	13.76	13.16	13.43	16.21	16.36	14.69	13.59	17.89	16.79	14.42	15.97	16.5	16.52	15.24	17.13	16.36	13.81	15.11	15.82	17.37	17.56	13.41	16.89	16.91	17.3	15.12	16.16	13.49
3.00068	1.58529	0.282829	0.789603	1.28497	283.91	541.4	14.93	15.55	10.61	13.56	12.91	6.38	15.07	12.34	13.74	14.38	7.16	14.54	15.61	16.16	13.62	7.67	7.37	12.95	13.45	8.17	12.99	14.88	6.93	16.33	14.84	14.29	15.13	5.11	13.55	14.28	15.89	8.31	8.42	14.43	12.5	8.17	7.52	15.38	14.05	12.01	11.45	13.25	7.67
1.63595	0.710129	0.0452262	0.516235	1.28371	101.984	302.7	17.74	18.01	17.81	17.9	18.54	17.59	16.75	18.27	17.51	17.6	15.05	18.5	17.97	18.42	14.9	18.34	18.42	17.21	18.4	17.82	18.5	15.23	18.23	14.92	15.9	17.92	18.06	14.25	16.26	17.58	15.75	15.14	18.1	14.37	18.38	15.44	14.49	14.3	18.78	18.2	14.73	17.2	17.53
0.640394	-0.642968	0.171175	0.701386	1.28257	429.261	487.4	16.27	14.41	13.48	14.22	16.94	15.42	17.08	15.58	13.17	15.85	15.9	16.19	16.23	13.56	15.32	16.95	16.84	15.99	16.09	16.2	15.75	16.76	16.68	13.73	15.49	16.33	16.69	16.82	17.88	16.34	17.05	16.76	17.19	15.34	16.62	14.56	15.72	15.19	17.29	17.09	12.99	12.48	16.36
1.35335	0.436538	0.402365	0.82494	1.28118	713.604	519.4	17.8	15.5	16.16	15.57	15.15	15.84	16.14	15.1	16.89	14.33	14.59	15.04	15.29	16.89	15.55	15.47	15.36	15.92	15.15	16.84	17.08	15.89	14.24	13.57	15.77	14.94	14.17	15.51	15.23	15.03	15.97	15.46	15.27	14.94	16.77	14.43	14.61	14.89	14.25	16.15	14.99	14.65	14.18
1.29956	0.378022	0.282528	0.789603	1.27993	719.238	483.1	15.38	15.48	16.1	16.42	15.23	15.49	16.61	15.64	16.09	15.08	15.71	15.54	15.84	15.12	16.5	15.91	15.05	15.61	15.42	15.77	14.61	14.91	14.61	16.01	16.25	15.83	15.25	13.49	15.86	14.99	16.55	15.94	14.74	16.03	17.58	14.38	15.78	15.98	14.2	13.78	16.04	16.04	14.12
0.71495	-0.484086	0.0196525	0.40454	1.27813	433.243	592.1	17	13.6	16.9	13.66	13.79	13.81	16.69	13.71	16.6	16.73	14.42	16.57	14.36	16.48	16.58	16.18	14.49	16.12	15.05	16.52	14.13	16.52	15.29	15.6	16.19	15.96	16.13	16.06	14.22	15.92	15.92	16.08	15.58	15.92	16.3	16.24	16.04	16.36	16.27	16.47	16.38	15.74	16.43
0.664412	-0.589849	0.104392	0.610923	1.27729	742.635	594.8	17.05	12.74	13.29	12.78	14.76	16.04	16.87	12.76	16.74	15.25	16.56	14.38	13.53	14.53	15.69	17.53	13.72	15.42	16.19	14.87	16.87	15.52	16.04	16.53	16.65	15.27	15.02	15.88	15.18	13.97	15.8	16.05	15.96	15.85	13.52	15.62	12.97	15.54	14.23	15.51	15.79	14.92	15.17
0.659901	-0.599677	0.0618474	0.566284	1.27498	826.501	594.3	15.3	12.63	14.4	16.29	15.77	14.06	15.33	11.74	15.3	14.59	15.64	12.2	12.42	15.21	16.02	16.03	12.81	15.58	12.01	15.31	14.89	14.9	16.92	15.5	16.11	14.3	13.53	15.29	16.55	13.92	15.09	15	15.43	13.56	15.7	15.92	16.27	14.72	15.61	15.63	15.07	13.69	15.1
0.666863	-0.584538	0.101173	0.61062	1.2748	1514.47	417.4	19.35	18.98	16.74	20.17	18.82	20.29	18.95	16.65	16.64	19.4	19.79	18.76	20.51	19.87	16.92	18.85	16.86	20.76	20.42	20.15	18.67	19.82	20.2	19.96	20.07	19.23	18.02	19.18	16.97	20.39	20.2	20.1	19.81	18.99	17.98	18.67	19.7	20.4	19.69	19.43	18.49	20.6	20.27
1.39541	0.480688	0.107099	0.612125	1.27324	451.354	368.8	18.79	18.67	18.25	18.38	17.87	19.25	19.42	19.43	18.74	18.15	19.41	18.63	19.74	17.81	18.73	17.82	17.75	18.75	18.48	16.71	18.6	18.42	19.24	18.85	18.43	16.33	19.26	19.63	18.34	19.3	18.6	18.93	16.36	16.19	18.5	18.87	18.23	18.42	16.69	18.21	18.91	16.22	16.79
0.640366	-0.643032	0.228999	0.751091	1.27269	756.46	519.4	15.34	15.21	15.15	13.2	12.96	15.06	14.79	11.8	15.97	11.38	12.84	12.3	12.54	14.79	14.51	15.71	16.47	13.1	12.12	15.46	15.18	14.71	13.58	15.63	15.03	12.57	14.11	12.96	12.37	14.21	14.29	13.54	13.7	11.97	15.23	14.99	14.21	15.35	15.71	15.33	15.35	15.64	15.36
1.40893	0.494602	0.230584	0.751123	1.27186	265.252	527.9	16.97	15.23	17.09	15.51	15.83	15.39	15.23	15.56	15.87	18.51	14.35	18.51	16.92	16.59	16.98	16.1	16.77	15.57	15.84	16.65	15.95	16.15	14.94	16.1	13.23	16.95	13.82	16.25	16.03	16.06	14.95	15.84	15.23	15.87	16.07	16.22	16.84	17.62	15.37	15.25	16.79	15.79	16.38
0.663185	-0.592516	0.4372	0.84218	1.2696	819.462	396.3	16.23	19.21	19.65	18.59	18.25	19.04	18.81	19.68	20.13	18.76	17.12	18.75	19.94	19.31	17.36	18.69	20.27	21.17	18.96	21.54	18.51	18.75	20.15	18.76	19.61	19.08	20.37	19.82	18.26	19.91	20.66	20.11	19.69	18.68	16.38	16.45	19.41	20.68	19.78	19.03	17.71	20	16.49
0.696956	-0.52086	0.0429474	0.504184	1.26885	684.365	483	13.18	15.32	15.58	15.69	15.16	15.28	12.6	14.82	15.48	15.06	15.09	15.43	16.17	12.85	15.24	16.62	15.35	15.1	15.29	16.81	14.9	13.7	14.34	15.67	15.45	15.2	13.81	15.48	15.42	14.02	13.82	13.95	14.36	17	16.81	16.51	16.82	15.34	15.95	16.09	17.01	15.32	13.62
0.709281	-0.49557	0.0829156	0.59444	1.2684	312.782	48.9	17.5	16.81	17.12	17.53	17.37	16.39	17.1	16.51	17.45	16.9	17.4	12.83	13.05	16.43	17.52	17.05	17.09	16.81	16.04	17.36	16.88	17.31	16.83	16.78	16.79	17.27	16.54	17.5	18.47	17.04	16.37	16.93	17.1	16.94	18.4	17.45	17.74	17.1	17.14	17.99	16.59	16.87	14.62
0.473579	-1.07832	0.0255202	0.448193	1.26693	377.264	484.3	17.52	16.03	17.21	13.3	11.19	11.52	15.87	12.27	11.4	15.57	12.51	19.66	12.18	18.17	18.23	17.08	18.17	16.42	15.98	16.09	17.18	16.92	16.45	12.32	16.01	18.07	11.69	16.52	16.46	16.18	15.81	15.3	11.36	17.82	16.9	17.55	18.96	16.33	14.62	15.1	17.52	12.87	16.22
0.67431	-0.568516	0.368247	0.811688	1.2665	359.298	334.4	13.66	15.14	16.06	14.28	15.71	17.32	16.47	16.79	17.4	15.33	14.43	16.93	15.17	14.43	14.22	16.68	15.69	15.29	16.08	15.06	14.89	15.46	13.06	16.25	17.08	15.01	17.5	14.92	15.75	16.7	18.01	17	16.38	15.56	15.85	15.21	18.47	17.52	17.26	15.22	16.89	15.21	18.04
2.1965	1.1352	0.275689	0.788533	1.26557	547.452	512.8	13.7	18.31	18.12	18.21	18.55	17.36	13.19	15.68	19.05	17.5	19.34	18.78	17.22	13.54	18.72	18.32	14.83	13.28	13.27	18.52	13.61	19.32	12.48	18.07	13.57	13.59	17.23	18.36	17.8	18.6	13.55	14.34	17.77	17.77	18.25	19.87	13.09	16.61	14.35	13.92	17	12.43	14.33
1.50859	0.593204	0.48483	0.868927	1.26469	397.294	452.9	15.11	15.06	14.31	15.07	14.69	15.19	19.06	14.28	15.69	15.76	15.46	15.13	15.79	15.3	18.69	16.39	14.49	15.34	14.94	15.52	17.68	17.26	13.44	15.28	15.63	15.28	12.24	15.16	13.19	15.43	15.01	15.54	12.82	14.2	15.34	15.91	14.3	15.15	15.64	15.94	15.05	14.75	15.79
0.671131	-0.575333	0.302935	0.792819	1.26396	268.978	568.3	12.36	14.06	15.84	14.27	14.47	14.27	11.77	14.43	12.61	15.66	14.68	14.77	13.85	13.22	14.86	16.16	15.5	15.71	14.6	12.94	12.22	14.77	15.49	16.69	14.98	13.58	14.44	15.19	14.88	14.84	12.33	13.24	15.09	15.28	15.06	13.32	14.21	15.09	13.02	12.72	14.77	14.53	16.72
3.08766	1.62652	0.26946	0.786816	1.26388	826.685	47.1	17.91	17.3	18.07	16.94	16.06	8.42	18.76	8.73	16.63	18.33	17.26	15.86	19.32	16.06	16.93	9.71	16.94	15.77	8.84	15.79	17.11	9.76	15.73	9.21	14.99	17.16	18.4	17.65	14.94	16.87	17.39	15.44	18.99	16.58	17.1	9.92	16.62	16.13	17.12	9.53	8.31	16.35	9.35
2.70634	1.43634	0.143426	0.676377	1.26194	338.215	384.7	9.08	15.47	9.21	16.79	17.08	13.53	15.17	14.47	16.39	12.04	14.18	13.1	16.89	15.14	16.96	10.25	16.42	8.84	17.44	15.84	16.39	12.67	16.78	9.47	9.42	15.24	12.32	16.58	9.28	11.45	10.43	15.34	9.21	9.01	15.16	13.5	9.28	15.04	10.13	16.38	16.71	8.05	16.37
1.67357	0.742925	0.0696787	0.574409	1.26109	207.985	303.9	18.39	19.96	18.98	19.62	19.77	15.74	16.61	19.85	20	19.53	20.16	19.66	19.74	20.08	19.17	19.86	18.43	19.28	19.08	19.01	19.59	16.02	19.26	15.88	15.75	15.65	19.53	19.66	19.57	15.39	19.2	15.82	20.02	15.48	19.49	19.07	19.37	19.03	19.17	19.62	20.34	18.89	19.67
0.69597	-0.522903	0.0900337	0.603355	1.26026	466.201	519	16.86	12.72	16.64	12.77	15.09	12.97	15.7	16.08	15.63	16.13	15.85	16.31	15.96	16.15	16.44	16.01	17.04	15.57	14.19	15.74	16.02	16.18	15.08	18.05	16.52	15.73	13.01	15.2	15.65	15.67	16.37	16.63	15.87	15.74	17.1	16.01	15.47	15.5	16.66	15.76	16.07	15.81	17.15
0.423625	-1.23914	0.395723	0.823262	1.26012	715.886	36	18.23	16.45	15.55	10.8	16.19	10.83	10.83	17.85	14.73	10.32	15.93	14.35	16.46	11.33	11.45	17.09	16.81	16.17	10.92	17.43	15.72	12.13	16.78	15.72	16.74	12.41	17.14	16.48	16.63	12.4	17.6	12.39	18.17	12.07	16.91	12.46	14.18	16.63	15.91	17.67	10.8	15.49	17.3
0.493219	-1.0197	0.277663	0.789317	1.25955	580.208	387.8	11.71	17.6	14.84	14.53	15.04	16.29	11.22	16.45	16.38	15.89	14.52	16.58	15.71	11.66	11.77	16.79	17.7	17.33	15.74	19.23	11.81	16.79	17.77	15.38	16.16	15.99	15.73	14.06	16.56	15.41	11.85	15.39	16.42	15.98	16.62	18.25	18.42	17.84	12.46	12.27	17.83	13.69	12.36
0.583218	-0.777892	0.0221422	0.421947	1.25811	310.203	285.4	20.99	19.99	17.3	17.32	17.35	17.27	21.29	17.27	19.63	20.27	21.88	17.38	21.07	20.07	21.4	17.67	17.38	19.86	17.29	20.07	20.58	20.8	20.48	17.38	21.71	21.11	20.79	21.26	17.57	20.96	20.75	20.85	17.22	21.05	20.68	21.14	18.12	21.25	21.34	20.04	21.92	20.74	20.35
0.603686	-0.728129	0.200287	0.719287	1.25725	268.661	577.2	12.18	10.17	14.55	10.28	14.16	15.1	14.38	14.26	13.71	13.62	11.31	13.82	13.01	14.7	11.97	11.6	14.62	12.55	14.07	16.62	13.63	11.6	11.68	13.69	15.9	13.24	13.52	12.52	14.67	14.78	15.16	14.69	13.67	13.28	12.72	16.29	13.86	13.24	13.91	14.35	10.09	14.1	15.64
1.5206	0.604645	0.118134	0.627616	1.25692	528.408	405.5	20.24	18.03	17.97	18.31	18.36	17.94	19.91	18.07	18.34	18.26	18.78	19.64	18.28	18.9	18.33	17.63	19.43	18.13	18.6	19.33	19.45	18.44	18.53	18.35	19.63	17.88	18.26	18.18	18.53	18	18.99	14.89	18.32	18.52	13.56	17.66	18.05	17.65	17.01	19.19	18.2	18.01	19.15
1.61179	0.688667	0.0945525	0.61062	1.25644	148.539	285.6	12.62	11.77	15.76	14.04	14.58	15.72	16.61	17.47	15.66	12.46	15.73	14.24	16.13	16.91	13.93	13.49	15	13.06	14.95	15.29	12.52	13.25	14.8	14.89	13.78	12.53	13.83	13.03	13.27	13.94	15.68	15.33	13.49	14.77	14.25	17.2	13.82	11.36	15.24	16.57	13.85	13.02	16.01
2.08985	1.0634	0.288153	0.789603	1.25547	176.952	372.1	18.75	18.57	18.81	18.87	18.49	17.05	13.29	18.4	17.2	19.09	18.54	18.88	13.83	18.35	19.56	14.56	18.57	13.41	18.85	14.28	18.72	18.69	12.66	13.79	13.64	13.66	18.06	18.84	18.75	18.12	13.64	18.13	18.05	18.37	19.12	18.94	18.1	14	18.89	19.12	18.63	14.55	14.4
1.6991	0.764774	0.337964	0.801285	1.25154	265.151	347.4	19.85	18.83	18.69	16.38	18.35	19.58	19.55	19.2	18.98	17.2	20.43	20.63	18.45	19.79	21.01	19.79	18.52	18.75	19.34	17.23	19.85	20.4	14.74	18.1	15.92	19.97	19.41	19.07	14.26	20.13	19.01	18.44	18.96	20.25	19.11	16.82	17.69	13.43	19.65	17.82	18.48	18.37	19.75
0.433243	-1.20675	0.0827774	0.59444	1.25076	371.251	523.8	14.92	14.43	17.27	9.28	12.77	9.42	13.79	13.31	9.01	15.19	9.97	17.44	10.69	16.23	15.19	10.51	16.02	14.67	9.59	17.4	15.51	13.91	13.32	13.67	14.92	16.02	15.03	14.79	9.65	17.27	14.42	17.24	12.77	13.72	15.21	15.07	15.22	15.87	16.24	14.59	17.75	14.61	10.41
0.673677	-0.569871	0.241984	0.765364	1.2505	140.049	53.2	15.34	15.59	13.01	12.52	15.96	15.96	12.84	15.61	14.77	12.1	13.54	15.38	15.26	15.49	15.39	15.96	13.52	12.82	15.34	15.85	15.85	14.77	15.04	15.32	15.19	13.23	15.43	15.71	15.81	14.76	15.8	14.7	14.96	12.48	16.1	17.71	15.06	14.65	15.98	14.97	15.36	15.77	15.62
0.543238	-0.880344	0.178232	0.703149	1.24914	431.245	585.2	18.67	17.01	18.41	16.68	18.17	16.4	18.61	18.1	17.79	18.95	17.6	18.83	5.85	17.95	18.67	17.43	18.31	17.54	17.81	18.28	17.55	17.53	18.38	18.46	18.8	17.89	17.73	18.33	18.07	17.96	18.27	17.69	18.15	18.21	18.34	18.26	17.88	18.15	17.68	18.65	18.02	17.91	18.65
0.660718	-0.597892	0.0985564	0.61062	1.24646	504.305	473	19.63	19.85	21.33	20.15	20.48	20.99	21	17.05	16.99	19.89	17.12	18.67	17.19	20.33	18.31	19.99	17.2	16.93	19.62	20.3	20.23	18.63	20.87	19.87	19.84	19.98	19.72	19.94	20.89	20.79	20.74	20.96	20.37	19.97	18.84	20.08	20.01	20.27	19.89	21.35	20.11	19.88	20.3
0.677807	-0.561054	0.296959	0.792819	1.24632	594.204	471.3	14.85	14.64	16.08	15.26	13.95	15.66	15.68	15.63	14.66	11.47	16.36	12.39	15.83	15.37	12.63	13.64	15.57	16.2	16.02	16.34	14.74	13.44	15.67	12.77	14.86	14.46	13.29	15.04	16.5	15.68	16.06	16.03	15.41	15.29	13.67	14.9	15.26	15.67	15.1	16.72	15.25	14.89	16.22
2.65187	1.40701	0.387521	0.820834	1.24558	401.285	411.4	17.75	17.8	18.95	17.54	16.88	17.56	15.7	14.79	11.13	19.74	12.32	17.65	12.05	18.39	16.51	16.25	18.76	11.4	12.47	17.77	17.76	15.29	11.01	17.67	18.55	18.8	16.27	18.2	17.04	11.17	18.3	12.93	11.17	11.51	16.69	13.04	11.29	10.76	12.66	19.37	11.36	14.18	12.52
1.96871	0.977247	0.296804	0.792819	1.24495	282.278	524.1	20.68	17.46	19.05	18.94	18.72	18.11	18.82	19.11	18.95	22.79	14.71	20.79	21.2	19.93	19.71	16.42	14.81	14.32	18.31	21.72	18.11	19.42	19.63	19.88	17.49	19.58	15.27	19.81	18.29	18.32	17.23	20.17	18.18	13.9	20.29	20.31	18.64	21.71	19.7	14.74	20.4	17.51	15.11
0.541193	-0.885785	0.16532	0.694957	1.24327	889.804	41.5	17.98	19.23	15.96	17.18	18.31	11.49	11.53	16.23	17.98	15.61	19.96	16.28	16.58	14.68	12.06	18.28	17.15	18.01	16.89	17.65	18.29	17.01	15.8	18.58	17.41	13.02	17.3	16.55	18.21	14.95	18.78	16.54	15.96	16.02	16.98	17.74	15.8	18.28	14.5	17.47	17.94	16.99	17.91
0.680287	-0.555785	0.177769	0.703149	1.24267	1033.65	423	18.52	17.81	15.33	18.17	17.59	15.28	18.16	19.38	18.67	18.5	17.31	15.4	18.54	18.12	15.43	18.43	15.59	19.48	16.9	17.87	17.76	17.83	16.02	18.26	18.21	18.57	18.5	17.94	18.34	18.84	18.1	18.63	18.41	17.66	15.61	15.82	18.43	18.17	19.21	17.9	18.62	18.79	19.56
0.57843	-0.789785	0.036188	0.473429	1.24223	569.431	576.1	16.01	13.24	14.38	11.1	15.33	11.31	14.32	11.31	14.49	13.01	14.94	14.73	12.07	15.54	12.92	15.27	12.22	15.1	11.43	12.6	13.53	16.67	11.05	14.66	15.93	14.91	15.61	15.81	14.33	11.97	13.83	15.35	15.24	15.28	15.43	16.87	11.31	15.66	15.08	14.36	11.4	15.6	15.28
1.62785	0.702968	0.0731659	0.574409	1.24067	856.807	42.7	14.63	18.87	18.56	19.16	18.99	16.93	17.15	18.8	18.73	18.5	17.79	18.41	18.65	19.45	20.51	19.34	18.13	14.33	19.33	14.97	19.96	14.98	18.12	18.44	15.49	18.73	17.9	18.29	18.6	19.5	18.35	17.97	17.8	18.49	18.76	16.83	18.66	19.18	14.98	17.74	17.08	16.18	15.12
0.398599	-1.32699	0.098022	0.61062	1.23946	135.091	82.1	15.35	17.12	10.51	10.43	9.97	16.82	14.85	15.76	10.32	16.68	17.27	10.86	17	15.82	16.09	17.95	16.95	16.33	17.97	12.73	16.82	17.04	9.97	16.91	17.38	17.06	10.61	17.32	16.29	18.06	17.61	17.41	10.43	16.55	16.8	17.84	10.54	14.75	17.78	16.58	10.28	16.96	11.43
1.34358	0.426086	0.285005	0.789603	1.23681	145.98	378	17.15	17.93	19.08	17.83	18.75	18.17	17.47	16.46	17.56	18.97	17.88	18.9	17.6	18.67	19.36	18.3	18.1	18.09	17.3	15.5	16.61	18.54	15.79	18.43	16.96	18.29	17.17	17.5	18.17	18.52	15.07	18.53	18.1	18.45	17.34	17.57	18.66	17.18	18.52	18.36	17.12	18.18	18.39
0.683845	-0.548258	0.144162	0.676377	1.23646	281.139	375.6	17.01	17.03	15.16	17.11	15.1	16.81	16.67	17.01	18.44	18.08	15.37	15.23	18.14	16.62	15.28	16.75	15.43	17.88	18.23	17.13	17.04	18.59	17.59	16.85	16.42	16.48	14.94	17.12	16.47	17.09	17.02	17.07	15.08	14.79	18.58	18	18.14	17.2	18.95	19.08	17.38	16.67	18.54
0.702202	-0.510043	0.100394	0.61062	1.23627	103.041	53.9	14.07	14.24	15.56	14.4	14.46	13.34	13.34	15.35	13.78	14.16	16.67	15.46	16.07	15.35	14.23	15.36	15.8	14.86	16.06	15.4	15.08	14.59	13.56	14.87	15.12	15.65	14.61	17.29	15.3	16.67	15.78	16.63	12.04	16.65	15.32	15.62	14.51	14.56	15.85	15.6	13.08	14.35	15.81
1.43381	0.519849	0.0973989	0.61062	1.2353	413.234	587.7	16.01	15.65	16.37	16.45	15.43	15.47	16.33	15.22	15.7	15.95	15.89	15.84	13.57	14.63	16.02	12.6	16.06	15.22	13.18	15.26	15.83	12.54	14.76	15.47	16.32	14.95	15.82	11.1	15.67	15.61	15.55	16.31	15.57	14.03	16.13	15.9	15.53	16.06	15.76	14.21	15.54	14.99	16.3
0.710795	-0.492495	0.387385	0.820834	1.23459	225.063	52.1	15.6	15.93	16.22	13.66	16.34	15.21	15.83	15.93	15.32	15.52	13.58	15.92	13.3	15.87	16.06	17.39	16.45	18.06	14.87	15.12	16.42	15.31	15.7	17.07	15.73	15.15	16.26	13.81	16.13	15.59	15.95	14.14	15.79	12.54	16.69	16.48	15.9	15.89	15.94	15.85	15.96	15.5	16.57
0.669762	-0.57828	0.1739	0.703149	1.23388	478.35	507.6	16.85	15.03	13.55	16.29	16.4	16.98	17.01	15.84	16.86	12.78	15.99	16.01	16.57	13.59	13.7	17.43	13.93	13.39	16.9	14.28	17.04	16.42	16.33	16.95	16.54	15.99	16.55	16.77	17.09	17.13	14.53	14.38	16.15	16.72	16.67	14.6	16.7	16.72	16.43	16.94	16.86	16.38	14.39
0.442438	-1.17645	0.0521331	0.540659	1.23314	1048.96	295.5	16.61	11.29	11.62	17.78	16.95	18	17.55	11.34	17.13	10.76	19.19	17.15	17.73	17.84	12.01	17.82	12.25	14.63	19.06	18.16	18.33	17.47	11.12	18.94	18.48	16.89	16.54	18.73	17.8	17.52	17.99	18	15.12	18.88	17.52	16.86	17.63	18.23	12.74	13.34	17.75	16.25	12.61
0.600787	-0.735075	0.118935	0.629572	1.23299	807.47	397.4	18.87	19.43	15.55	19.31	15.5	15.49	18.31	19.81	20.15	18.64	15.69	20.28	20.23	20.11	15.67	18.74	15.78	21.46	18.75	22.05	18.35	18.78	19.89	18.05	19.46	19.01	19.11	18.55	18.53	19.41	20.4	19.74	19.95	18.95	17.33	18.8	18.92	19.17	19.81	19.11	18.46	18.88	16.85
0.741875	-0.430753	0.266561	0.786816	1.23227	147.983	392.6	18.56	18.63	16.44	18.08	18.92	18.35	18.3	16.3	19.52	18.69	16.5	16.48	18.5	18.55	19.48	19.51	18.69	18.19	17.86	18.32	17.84	16.64	18.67	19.32	18.3	18.21	18.55	18.83	19.68	19.01	18.16	16.35	18.94	18.31	17.95	18.51	18.69	19.15	20.18	19.81	17.48	18.57	18.52
0.678555	-0.559462	0.171666	0.701386	1.22941	438.633	48	17.69	17.08	15.67	15.59	15.59	15.61	15.34	18.41	15.53	18.5	17.13	19.63	18.68	17.25	15.75	18.97	15.89	18	17.84	18.54	18.48	15.9	17.75	18.39	17.39	18.82	16.51	15.28	15.86	18.67	17.89	18.95	15.52	18.13	16.96	18.24	17.01	17.37	17.27	17.76	18.38	17.38	17.57
1.44869	0.534753	0.0732848	0.574409	1.22812	732.22	525.1	13.02	14.76	13.63	16.03	14.82	15.54	13.8	17	15.54	13.3	13.11	14.5	14.59	12.73	15.84	13.75	15.48	15.06	15.15	13.51	12.87	13.59	14.91	12.99	12.85	12.85	12.45	15.34	15.1	15.07	12.84	13.81	13.87	16.25	12.83	13.88	12.23	15.02	13.63	13.28	15	14.16	13.48
1.42807	0.514065	0.277736	0.789317	1.22784	422.253	592.4	15.95	14.96	15.62	13.91	14.19	13.01	14.22	13.08	14.46	15.38	14.91	15.38	12.57	15.11	15.59	13.55	15.47	14.73	14.33	15.58	14.65	13.32	15.46	15.33	13.6	13.9	13.39	14.66	13.54	11.77	12.63	15.4	13.02	13.7	12.56	13.65	12.99	13.94	13.37	15.35	15.46	14.69	13.23
0.666456	-0.585419	0.16839	0.696199	1.22674	637.499	590.4	15.46	14.04	11.58	13.33	16.24	13.08	11.4	14.25	13.7	14.35	16.1	14.23	15.99	13.84	14.39	15.12	16.03	14.54	14.45	12.63	16.35	14.97	15.13	14.53	15.01	15.66	14.28	14.27	11.77	14.87	12.01	15.15	14.07	14.9	15.45	13.07	14.99	14.02	13.69	15.38	15.97	15.05	15.92
1.37251	0.456817	0.148652	0.683165	1.22577	254.915	534.8	17.09	13.39	16.54	16.97	15.46	16.96	17.25	16.08	17.3	16.6	15.41	17.97	15.78	15.65	16.22	15.91	16.64	15.54	15.15	17.68	15.43	14.6	15.64	17.3	15.13	15.24	15.39	15.23	16.07	17.58	15.1	14.62	15.23	15.76	14.15	15.98	16.72	15.48	17.5	17.48	15.77	15.55	15.54
0.624901	-0.678301	0.069401	0.574409	1.224	520.922	47.4	17.99	18.45	18.31	14.37	18.65	15.62	17.78	14.32	16.52	17.13	17.77	14.66	14.87	14.57	17.43	18.23	14.95	18.23	14.52	17.64	18.37	17.7	18.45	14.74	14.6	17.47	18.4	18.32	18.4	18.53	17.37	17.35	17.71	18.34	18.07	17.55	18.19	16.51	17.18	17.15	14.48	16.34	15.24
0.587967	-0.766194	0.352092	0.808303	1.22378	186.93	66.5	13.01	15.96	16.32	15.92	13.89	14.53	15.17	16.35	15.99	16.88	13.1	14.02	12.88	13.98	12.77	17.23	17.17	12.37	17.13	13.48	15.67	16.31	17.44	15.99	14.04	17.35	12.43	16.05	17.32	15.38	12.81	15.43	15.26	12.95	12.81	17.47	15.37	16.64	17.88	15.31	14.2	12.99	16.88
1.83413	0.875097	0.364079	0.811688	1.22331	253.017	347.3	15.33	10.94	12.13	16.69	13.93	14.68	14.87	15.25	14.52	14.99	11.98	12.89	14.97	14.89	12.96	12.3	12.9	14.14	11.05	14.96	11.66	14.58	10.51	14.83	15.08	11.68	11.22	17.15	12.75	10.92	14.79	12.56	10.86	14.21	11.51	12.71	10.96	12.75	12.27	12.06	17.88	12.73	16.97
3.3893	1.76099	0.330686	0.795253	1.22202	192.05	63.3	15.43	16.55	15.38	16.27	7.52	7.67	8.05	15.98	12.45	16.09	15.62	16.8	17.21	16.79	17.15	9.28	15.07	16.98	16.78	17.47	14.79	15.43	15.07	14.6	16.18	15.36	8.31	6.93	8.31	7.52	8.73	9.76	8.52	8.05	9.28	16.43	8.42	6.93	9.28	9.35	15.23	16.06	16.2
1.41687	0.50271	0.192167	0.707381	1.22132	200.2	54.7	20.52	20.2	19.84	19.82	21.55	19.34	21.54	20.48	20.83	20.51	21.57	20.36	18.02	19.86	20.87	20.4	19.84	20.21	19.82	20.6	18.2	20.47	20.47	20.51	19.88	17.88	20.91	17.94	20.37	20.34	20.67	18.77	20.93	17.78	20.57	21.34	20.08	19.57	18.02	17.99	20.83	19.91	18.12
1.37714	0.461677	0.211242	0.728905	1.22109	595.163	409.1	17.81	18.79	15.53	19.98	18.69	17.79	18.16	18.59	18.7	19.1	19.01	18.82	16.68	17.38	19.35	18.41	15.75	16.57	18.01	17.45	19.54	18.3	18.26	15.61	18.21	16.5	18.09	18.33	18.58	19.22	17.25	17.53	17.86	17.08	17.67	17.18	19.24	18.07	18.34	17.42	19.06	18.25	18.13
2.6343	1.39742	0.298259	0.792819	1.2209	225.123	114.9	17.1	11.27	11.52	18.01	18.31	17.5	18.76	16.87	18.23	16.72	19.67	18.46	19.59	17.26	11.98	17.5	12.2	11.41	12.48	17.43	12.01	16.92	16.63	12.05	17.94	12.01	17.87	16.78	18.93	14.9	18.11	20.56	17.66	17.8	11.78	19.68	16.35	10.78	12.67	17.81	11.38	10.66	19.41
0.497079	-1.00845	0.177396	0.703149	1.22024	492.647	48.7	18.47	18.46	13.4	18.74	18.87	13.09	16.06	18.7	15.29	16.78	13.9	13.41	13.64	13.49	14.52	14.42	18.29	13.22	13.19	17.31	15.52	17.65	18.76	19.89	19.5	17.41	18.67	18.45	13.44	16.59	19.26	17.68	16.82	15.91	18.07	16.45	17.09	17.43	18.83	17.77	12.89	12.34	16.79
0.662316	-0.594409	0.0377827	0.485023	1.21895	577.338	487.2	16.33	15.24	12.93	16.92	12.28	14.52	15.82	12.32	17.16	17.45	15.31	16.47	17.43	16.26	17.16	17.04	14.36	16.75	16.61	16.18	15.98	17.08	16.39	16.15	16.01	14.84	15.6	15.96	15.75	16.6	14.84	16.53	16.61	16.99	17.73	17.12	15.64	16.03	16.95	16.24	17.24	15.91	16.99
2.13927	1.09712	0.00453658	0.177334	1.2187	635.236	394.7	12.84	16.15	17.62	17.95	16.18	16.53	11.1	18.07	18.07	17.47	17.87	18.09	17.72	17.5	15.7	12.48	17.82	11.23	17.4	12.38	15.19	12.48	16.92	16.67	15.54	16.84	17.22	16.6	16.52	17.67	16.45	17.08	10.92	15.65	11.57	18.03	17.44	18.51	18.62	15.44	12.95	16.81	16.24
0.567786	-0.816581	0.193166	0.707381	1.21821	273.213	65.4	19.86	19.36	15.14	19.18	15.07	18.62	17.81	14.93	19.01	14.64	17.96	15.22	17.47	19.67	19.1	20.18	15.42	18.9	19.89	19	19.95	18.91	18.43	19.08	18.6	18.09	18.37	18.32	15.35	19.34	18.86	19.34	17.89	15.83	20.05	20.23	19.65	18.63	19.76	19.54	15.11	18.92	17.65
0.708668	-0.496817	0.399748	0.823262	1.21767	440.312	425.2	17.64	18.32	18.47	15.28	17.93	19.3	17.96	18.46	18.53	18.44	17.81	14.37	18.85	17.95	17.37	18.47	18.37	16.34	18.65	18.92	16.73	17.84	18.39	20.3	18.89	17.94	18.25	18.41	19.16	17.29	17.43	18.06	19.1	17.31	18.08	19.09	18.76	17.61	20.06	19.31	17.37	17.02	19.82
1.87463	0.906602	0.100164	0.61062	1.21656	506.356	413.3	16.24	19.87	19.96	19.48	20.17	19.89	15.88	19.93	19.22	20.6	19.72	20.09	20.44	16.06	21.42	19.88	20.68	19.84	20	16.35	16.26	18.86	20.45	19.65	16.06	15.95	20.22	20.87	20.48	15.72	16.02	20.83	20.55	16.82	16.4	20.49	15.84	15.81	16.37	16.17	19.71	19.9	16.5
0.541936	-0.883806	0.137894	0.664963	1.21263	1003.75	41.5	18.9	17.32	11.75	19.74	18.16	18.6	17.02	11.45	19.56	16.64	19.07	17.91	13.09	18.2	18.67	18.79	19.56	17.99	18.76	17.25	18.89	19.29	17.94	16.9	18.32	17.82	19.14	18.11	19.01	18.4	18.4	17.57	18.48	17.55	16.05	16.53	17.23	17.81	19.02	17.57	18.21	19.16	18.66
1.3835	0.468323	0.112137	0.616045	1.21126	517.42	583.9	13.68	14.14	15.21	12.93	16.1	15.25	13.16	16.12	14.69	14.45	15.89	15.5	14.89	15.71	16.65	14.45	16.06	13.25	13.24	15.53	13.57	15.13	14.35	15.8	13.52	13.55	13.2	13.8	13.46	15.38	14.72	14.31	13.05	15.06	13.7	14.51	15.78	15.22	14.32	13.89	15.53	13.81	15.4
0.723494	-0.466946	0.42792	0.839054	1.21108	502.274	407.5	16.97	16.57	19.77	16.79	16.84	19.51	19.51	19.16	16.71	18.51	19.78	16.84	19.29	19.07	17	17.26	18.84	19.63	16.77	18.85	19.06	17.9	19.04	18.53	18.88	18.56	18.46	18.27	17.04	19.06	19.24	19.43	18.75	18.43	17.09	19.12	19.02	19.23	19.16	19.67	16.85	18.46	19.31
1.84482	0.883484	0.330963	0.795253	1.20947	608.345	311.2	16.36	15.52	16.66	16.77	16.54	18.69	17.55	16.8	16.97	15.12	20.11	18.05	17.7	16.24	16.49	13.91	16.83	16.55	12.57	17.42	16.41	18.24	14.1	13.15	15.52	18	17.65	16.4	19.12	16.71	15.94	19.11	16	19.81	15.58	17.54	12.43	11.98	17.87	16.37	17.08	16.99	19.62
1.35907	0.442624	0.129523	0.65492	1.20931	406.772	45.6	18.27	18.35	19.32	20.13	20.53	17.14	19	19.51	18.45	19.1	19.99	17.5	16.18	18.71	18.34	19.26	17.33	18.1	18.88	17.13	18.54	18.71	19.99	18.42	18.78	18.09	17.75	18.03	19.44	17.61	18.05	17.94	15.83	17.76	18.52	19.22	17.62	18.27	18.05	18.26	18.09	18.9	19.81
1.69703	0.763011	0.323764	0.794027	1.20895	473.306	347.7	20.4	19.61	19.01	17.6	18.53	20.02	19.91	19.56	19.27	16.92	20.72	20.7	18.67	19.98	21.5	19.65	18.78	19.31	19.5	16.69	20.51	19.21	17.18	18.86	17.78	19.47	20	19.39	13.75	20.48	19.33	18.9	19.56	20.62	19.5	18.22	18.66	11.88	20.17	18.23	18.91	18.83	19.58
1.80266	0.850129	0.130605	0.657121	1.20784	256.263	516.6	19.08	21.16	20.26	18.32	17.89	18.22	18.79	18.83	18.01	21.73	15.14	19.69	19.4	19.23	17.96	19.21	18.68	20.94	17.92	18.8	21.02	20.14	20.55	15.01	14.91	18.88	14.73	19.57	16.66	18.1	18.51	18.99	15.82	14.5	18.56	18.15	17.27	20.7	18.39	15.12	17.4	18.42	18.17
0.673436	-0.570387	0.0944829	0.61062	1.20684	299.15	375.6	16.99	16.78	14.47	17.2	14.12	17.38	14.13	14.12	18.03	18.3	16.56	14.51	17.51	17.03	18.24	18.21	14.8	17.1	17.94	17.29	17.27	17.18	17.88	17.42	16.84	17.06	15.25	16.25	14.6	17.56	16.96	16.83	15.39	16.37	18.06	17.59	16.71	16.37	17.55	17.48	17.82	17.64	17.36
1.86974	0.902839	0.541097	0.883174	1.20636	414.299	349.5	25.53	24.89	23.98	22.99	22.4	24.89	25.37	24.81	24.25	22.86	26.79	25.86	23.84	24.73	26.23	24.65	23.69	23.94	24.04	23.14	25.37	24.96	16.95	23.94	22.07	25.25	25.25	24.89	22.11	25.37	24.04	25.67	24.47	26.79	24.38	22.79	22.7	15.88	25.05	23.51	24.29	23.73	24.96
1.56394	0.645183	0.325303	0.794027	1.20585	172.975	367.8	17.75	17.5	17.03	17.63	17.24	16.96	17.72	18.2	13.76	18.29	17.29	16.26	17.05	17.01	15.17	14.98	14.47	16.4	13.93	14.66	15.43	14.7	17.2	14.24	18.21	17.59	13.82	17.58	14.19	17.51	17.28	16.86	17.23	18.28	17.45	17.04	17.52	17.07	14.7	17.73	13.79	16.9	17.32
0.719343	-0.475247	0.0474517	0.524323	1.20319	199.169	407	18.14	18.18	15.32	17.88	18.24	16.27	18.4	15.11	18.34	17.44	18.43	18.19	18.58	16.48	18.21	18.45	18.5	18.18	18.93	18.4	17.94	15.65	14.91	18.65	18.6	18.17	18.6	18.11	18.54	17.88	18.38	15.48	18.26	18.1	18.58	18.35	18.4	18.31	18.76	18.38	18.3	17.8	18.16
0.70413	-0.506086	0.448753	0.846936	1.20242	513.166	389.9	15.59	17.9	16.96	15.4	15.85	17.44	14.06	17.99	17.24	17.62	16.63	17.32	17.29	16.94	15.54	17.51	17.89	17.92	17.08	14.86	16.32	17.45	16.69	16.34	17.93	17.87	16.69	17.47	15.56	18.78	18.07	16.4	17.97	17.74	14.61	17.4	17.66	18.06	19.36	17.17	18.08	17.33	15.04
0.648792	-0.624172	0.0828704	0.59444	1.19881	819.773	42.3	19.03	18.61	14.62	16.63	16.82	19.4	20.16	16.02	17.21	19.65	18.78	16.67	16.26	16.98	16.87	19.31	18.5	18.97	17.76	17.28	19.48	20.62	18.28	16.28	19.04	18.81	17.09	17.9	19.45	15.18	17.46	18.3	18.56	18.6	20.1	19.67	18.89	18.57	16.84	16.19	18.08	17.22	19.71
1.45064	0.536688	0.0998582	0.61062	1.19741	746.597	594.6	17.49	16.44	18.12	17.71	18.16	18.06	18.13	16.86	17.98	17.27	17.93	17.35	14.71	17.35	17.85	17.96	17.53	18.06	15.43	17.4	14.56	16.63	18.28	18.11	18.56	16.88	17.96	17.76	16.85	17.25	14.45	16.82	17.47	17.9	14.74	15.22	16.9	17.78	14.99	17.58	17.77	16.71	15.13
3.70326	1.8888	0.0909014	0.603504	1.19651	214.985	553.9	17.05	16.27	16.8	13.59	5.85	16.97	16.01	7.37	14.91	16.33	16.09	7.16	16.92	15.89	17.93	16.36	16.85	15.81	15.76	8.31	15.28	9.47	13.59	16.36	15.89	7.81	7.52	16.23	7.67	16.77	16.53	8.52	7.52	6.38	16.64	8.42	16.23	16.63	17.18	8.42	16.55	15.82	7.93
1.31215	0.391935	0.437249	0.84218	1.19555	99.0095	551.3	18.23	17.62	17.8	17.49	17.28	17.52	17.24	18.14	17.71	18.25	17.48	15.63	17.27	18.24	18.55	16.23	18.27	17.59	15.52	18.42	17.9	17.61	16.89	18.41	17.96	17.46	15.36	17.5	16.84	15.14	17.54	17.5	15.45	17.34	17.94	17.88	17.84	16.71	17.68	18.14	17.13	18.04	16.08
1.3144	0.394409	0.108001	0.612575	1.19534	875.546	519.3	17.73	17.67	18.02	17.78	15.87	17.75	15.67	17.93	17.8	18.16	18.08	16.98	17.67	15.89	18.25	16.53	17.76	17.72	17.29	16.18	16.05	17.39	17.45	16.01	15.88	15.79	17.68	17.98	18.28	17.11	15.84	17.44	17.76	17.56	16.24	16.3	15.65	17.77	16.22	16	18.1	17.76	16.35
0.634049	-0.657333	0.206988	0.722918	1.19519	508.282	388.9	17.84	15.14	17.5	13.08	17.33	17.26	17.53	17.93	18.35	16.93	14.05	17.18	18.14	15.21	19.62	18.31	18.98	17.88	17.61	17.76	18.11	17.65	17.36	14.72	16.91	16.62	15.99	15.37	17.74	18.74	18.42	16.18	17.67	17.28	16.25	16.32	18.96	18.59	18.82	17.33	18.87	18.09	14.41
1.45538	0.541398	0.261589	0.783832	1.19468	117.102	296.9	18.46	18.47	18.63	18.36	18.77	15.93	18.55	17.71	18.48	15.69	18.5	18.27	18.32	15.97	18.14	19	16.19	18.96	17.16	18.24	16.14	18.24	18.54	18.22	18.44	15.86	18.94	18.39	17.54	17.13	16.94	15.97	15.85	18.15	18.73	16.36	15.71	15.69	18.2	16.08	16	15.67	18.86
0.455216	-1.13538	0.182602	0.704727	1.19408	108.023	359.6	18.1	17.86	11.34	17.25	11.83	17.65	17.27	17.99	11.04	17.52	18.5	18.37	11.98	11.72	11.88	16.45	17.13	17.92	17.53	16.62	18.09	12.65	16.52	18.9	17.33	17.64	16.98	15.88	11.64	18.09	15.66	12.88	11.12	18.05	18.19	17.43	17.48	16.01	12.58	18.32	18.29	15.39	17.14
1.90451	0.929419	0.321969	0.794027	1.19394	320.886	578.8	15.96	16.63	10.13	13.8	12.18	14.21	15.11	15.01	13.62	14.53	14.33	15.02	15.97	15.1	17.58	11.23	10.61	13.51	10.32	17.48	15.42	11.19	11.92	15.34	14.11	14.79	11.29	11.91	16.86	14.47	15.44	11.55	14.75	12.97	16.55	11.52	14.35	15.5	11.16	13.76	16.84	13.14	13.96
1.39057	0.475677	0.237781	0.759158	1.19301	453.353	517.7	12.35	15.86	14.99	13.61	14.72	14.31	15.3	13.83	13.9	13.83	14.07	15.24	16.1	14.6	15.48	14.84	12.54	13.34	14.15	12.93	15.04	14.54	12.85	14.11	12.35	13.6	14.71	16.1	13.82	13.3	12.32	16.56	14.74	13.6	14.93	14.17	13.63	14.55	14.49	15.72	14.47	14.65	12.93
1.34926	0.432172	0.132418	0.65912	1.19272	465.375	117.2	18.22	18.3	16.15	18.19	16.11	17.88	18.11	18.52	17.95	17.97	18.16	17.77	16.33	17.75	18.05	17.83	18.32	18.1	16.07	18.14	18.45	17.3	17.92	18.28	16.11	16.01	15.97	15.79	16.38	17.71	16.06	16.13	17.66	17.84	18.81	16.51	15.89	17.78	18.21	16.2	18.51	17.74	16.54
2.15139	1.10527	0.0919288	0.60538	1.19266	816.36	519.4	8.73	14.74	14.02	13.32	13.34	8.63	14.16	13.96	14.1	13.93	13.05	16.07	14.37	14.02	14.46	14.21	14.22	13.4	13.14	13.52	14.07	9.92	12.16	16.12	15.15	8.92	14.61	13.99	14.44	12.95	9.08	10	12.74	14.07	8.52	16.28	8.84	14.11	13.84	9.65	8.42	7.67	10.61
0.75213	-0.410946	0.149026	0.683277	1.19253	241.055	53.2	15.97	17.51	17.52	13.51	15.55	14.21	13.82	16.42	15.85	16.38	14.87	15.89	16.48	16.81	16.22	17.16	16.64	15.88	16.57	16.55	16.4	15.81	16.31	16.46	16.47	15.25	16.07	15.42	15.73	16.14	16.27	14.08	15.46	18.13	16.82	16.75	16.19	16.01	17.02	16.47	16.48	16.57	15.35
0.57369	-0.801656	0.487523	0.870802	1.19193	299.126	375.7	15.99	15.3	17.18	18.52	15.48	15.95	14.71	17.65	12.1	11.68	13.08	16.02	15.53	16.94	12.75	18.82	18.74	17.25	15.5	17.43	14.47	17.18	16.31	18.78	16.39	17.16	16.71	15.1	13.57	16.23	16.95	16.33	16.79	14.91	12.76	13.83	15.94	18.36	13.58	13.23	15.25	16.33	16.88
1.74089	0.799828	0.790868	0.961762	1.19157	140.985	372.1	18.17	17.71	17.96	17.91	18.3	16.06	17.17	17.79	17.11	18.23	13.42	18.18	17.86	17.79	16.51	17.89	14.32	16.63	12.69	17.6	18.03	17.95	12.02	13.25	16.72	18.2	12.67	16.23	17.57	16.48	16.99	17.02	12.45	17.88	18.54	18.63	17.72	17.54	15.61	17.98	17.6	17.09	18
0.676757	-0.56329	0.0982427	0.61062	1.19112	635.415	493.4	16.68	16.85	15.72	15.67	17.22	15.73	15.59	13.34	14.6	15.99	13.28	12.77	17.21	15.8	16.32	13.88	17.29	17.06	16.38	17.03	17.33	16.93	16.19	17.03	16.67	16.26	15.14	15.68	17.7	16.06	16.64	15.98	16.93	16.86	15.95	16.87	16.32	15.36	13.81	15.57	15.65	17.14	16.87
1.8669	0.900645	0.155426	0.691709	1.18978	664.258	287.6	16.53	12.64	17.73	16.19	17.13	15.86	17.25	17.13	13.34	16.46	17.32	18.66	17.98	17.13	16	18.6	16.43	17.91	12.04	17.69	15.64	18.39	16.44	16.08	12.6	17.32	17.58	17.45	12.28	14.69	12.59	17.99	17.05	15.1	17.45	13.58	15.2	16.96	17.1	12.99	11.88	17.51	13.16
1.4631	0.549032	0.191617	0.707381	1.18883	939.583	564.2	17.05	15.82	13.79	16.47	16.84	15.77	16.25	15.83	16.54	16.48	16.02	16.76	15.22	16.48	16.03	16.75	14.11	16.24	17.03	15.81	17.16	14.48	16.52	15.95	15.63	15.91	16.09	16.88	16.42	12.89	16.1	14.5	15.81	13.1	17.13	16.43	15.46	12.97	17.08	14.94	13.3	12.84	16.39
1.32677	0.407914	0.367935	0.811688	1.18854	173.201	34.4	16.95	16.78	16.18	16.86	16.95	16.5	15.65	15.68	17.02	17.04	16.79	15.01	16.95	16.3	17.52	14.15	13.56	16.97	15.1	16.75	17.31	16.73	16.05	16.74	16.2	15.37	16.61	15.98	16.52	15.74	16.24	16.5	16.5	16.4	17.76	17.31	16.16	16.05	14.05	16.3	16.57	16.74	17.37
1.60453	0.682151	0.204778	0.722593	1.18825	699.04	60.4	16.4	16.43	17.85	16.37	16.56	17.09	16.45	15.6	15.34	15.35	12.94	16.34	17.29	16.72	15.62	12.55	16.28	17.03	16.4	17.19	15.99	17.34	16.57	13.94	15.23	16.18	15.54	16.27	16.51	16.25	16.75	12.74	16.17	17.95	11.64	15.48	14.06	15.94	12.4	12.25	14.63	15.2	16.97
1.80495	0.851957	0.192868	0.707381	1.18783	643.381	311	19.53	18.83	17.77	19.95	18.09	21.69	19.6	18.8	19.04	18.45	22.7	19.17	19.66	16.53	18.05	18.13	16.64	18.59	18.49	17.87	17.91	21.55	17.57	19.3	16.76	19.86	20.09	19.3	22.12	18.47	15.99	21.54	18.34	21.97	14.82	17.58	15.76	15.71	19.42	17.24	17.55	18.48	22.24
3.40571	1.76796	0.0457425	0.516552	1.18658	426.996	77.7	7.37	14.25	16.45	14.99	15.55	17.1	6.67	16.01	16.31	15.47	17.53	17.17	17.3	17.12	16.71	7.37	15.53	17.41	16.68	17.77	13.28	7.67	6.67	15.54	16.35	15.37	16.78	16.59	16.48	15.42	8.42	8.05	16.75	13.67	6.67	7.67	15.36	17.1	7.81	7.93	15.81	15.86	17.66
1.54238	0.625161	0.0892806	0.603355	1.18511	300.141	303.9	16.4	18.64	18.44	19.66	19.55	18.92	19.02	17.23	16.2	17.92	19.04	19.51	17.95	16.24	19.33	18.13	18.9	16.13	19.41	16.49	16.43	17.89	18.79	20.16	16.23	16.12	19.62	20.48	16.5	17.31	16.16	16.21	17.42	19.19	16.55	16.6	19.3	18.89	16.49	16.31	16.28	15.99	19.4
1.7865	0.83714	0.322668	0.794027	1.1841	304.022	66.3	16.44	14.88	16.49	15.21	15.67	14.09	11.64	14.99	15.99	15.89	12.48	15.75	15.65	12.02	15.58	13.08	16.62	13.95	15.96	12.8	17.45	16.55	11.19	12.3	12.15	16.21	12.62	13.73	14.59	11.33	12.18	13.11	15.15	11.62	15.99	13.22	16.24	10.96	12.91	12.57	12.7	15.64	15.74
3.40044	1.76572	0.130484	0.657121	1.1824	667.974	594	6.38	6.38	13.45	14.32	13.93	13.1	5.11	5.11	14.05	12.6	14	16.32	13.57	11.85	12.89	15.19	13.17	14.4	13.42	6.67	5.11	16.36	12.42	6.38	6.38	6.38	5.85	13.83	14.9	5.85	6.38	6.67	15.06	12.91	5.11	11.81	5.85	12.61	6.38	6.38	5.85	12.33	14.28
0.669982	-0.577806	0.28171	0.789603	1.1824	461.242	576.2	17.68	13.7	17.58	13.79	13.88	17.73	17.26	17.18	17.35	17.36	17.29	14.26	14.43	17.38	17.75	15.9	17.53	16.78	14.06	17.72	17.44	17.54	17.01	17.41	17.36	16.94	16.42	17.26	14.32	17.16	17.08	16.96	16.77	16.78	17.77	17.69	17.08	17.24	17.27	17.43	17.39	16.89	17.78
1.60274	0.680538	0.292179	0.789764	1.18201	1098.67	43.9	18.68	17.77	19.17	18.32	19.02	19.08	18.69	16.52	18.94	18.63	16.76	17.86	18.54	17.82	18.8	19.28	18.19	11.25	18.84	17.19	18.93	18.57	18.88	12.73	18.5	18.32	16.13	18.14	17.19	17.31	17.64	18.79	17.49	17	19.11	17.98	16.59	18.9	17.95	19.71	18.47	17.39	18.69
2.1564	1.10862	0.163323	0.694957	1.18158	109.01	29	14.97	15.75	10.73	14.34	15.91	15.3	15.62	15.77	12.5	14.05	16.21	14.04	11.22	17.19	16.26	15.63	11.22	16.73	10.63	16.48	15.76	15.15	17.04	16.09	16.13	16.08	10.78	8.92	10.96	10.43	15.65	12.09	11.34	10.86	17.18	12.18	14	11.51	16.42	11.52	15.5	9.76	16.78
1.6502	0.722645	0.198105	0.718368	1.18102	466.407	488.7	13.42	16.76	15.94	17.28	14.85	16.17	16.69	15.99	16.44	15.31	16.51	18.31	17.97	17.47	16.32	16.42	14.54	15.97	17.03	13.93	13.33	14.03	16.01	16.14	13.32	15.8	14.45	16.89	16.92	12.44	16.83	17.5	17.76	17.55	17.34	17.41	16.4	15.65	16.88	16.69	12.65	12.06	14
1.37523	0.459677	0.274315	0.786816	1.17799	367.135	364	16.24	17.17	18.34	17.19	18.15	18.5	18.45	17.97	18.26	16.79	19.27	18.4	17.8	17.71	17.36	18.23	16.56	16.22	18.45	16.19	16.96	17.02	15.81	18.19	18.54	18.68	16.23	16.88	16.94	18.03	16.36	17.08	16.15	18.47	19.83	19.46	16.09	16.69	16.38	18.75	17.15	16.72	18.81
0.710414	-0.493269	0.262437	0.78525	1.17791	1052.68	428	17.7	15.14	15.52	18.25	18.27	18.11	18.09	18.17	18.79	16.94	15.66	17.7	18.04	17.32	15.63	18.56	18.66	19.12	16.46	19.34	15.61	18.07	17.51	17.66	18.2	17.36	17.01	17.06	17.29	18.79	17.78	18.75	18.13	18.12	15.79	15.95	18.83	18.56	17.27	17.6	17.68	18.44	19.3
1.69506	0.761333	0.116461	0.624164	1.17766	331.915	353.5	13.91	16.14	13.74	16.22	17.41	17.26	16.16	15.85	17.24	17.54	14.13	17.5	17.22	17.63	18.67	14.68	14.04	15.83	13.49	17.58	17.93	17.96	16.53	18.85	17.18	17.36	17.39	17.06	13.7	17.14	13.78	14.47	17.72	13.02	16.81	14.71	13.23	16.81	14.47	14.07	13.21	16.5	14.49
1.52785	0.611505	0.25704	0.781371	1.17708	641.44	519.4	16.25	14.52	15.29	14.35	14.53	15.12	15.53	14.53	16.38	15.66	16.64	15.51	14.61	15.97	15.91	10.54	15.07	14.64	15.76	11.4	15.54	14.94	13.33	16.7	15.58	15.21	14.03	13.02	14.92	15.38	15.84	15.28	14.38	15.45	15.84	16.35	16.36	16.15	15.86	15.87	15.56	13.8	10.47
0.676414	-0.564022	0.200076	0.719287	1.17536	541.828	432.4	15.81	15.7	17.97	17.71	17.29	16.07	14.97	17.4	17.12	16.42	13.35	14.88	17.45	16.24	13.05	16.03	16.88	17.58	16.3	17.83	13.89	17.88	16.63	16.67	16.73	17.89	13.84	16.66	15.85	16.68	17.66	16.59	16.4	16.97	15.05	14.02	17.17	16.79	17.67	17.67	16.25	17.3	17.48
0.617585	-0.69529	0.516151	0.871788	1.17458	287.128	379.6	13.28	13.37	16.73	14.31	16.86	18.1	17.49	16.86	15.9	16.82	13.46	17.13	17.29	16.63	13.16	14.03	18.25	17.82	16.06	17.56	16.91	13.87	17.56	17.62	17.37	16.13	16.08	17.14	16.17	17.34	16.97	14.04	15.97	17.15	13.18	15.24	17.45	17.39	16.38	13.55	16.95	17.37	17.12
0.735828	-0.442559	0.0723835	0.574409	1.17353	398.243	370	19.04	19.79	16.26	18.66	18.75	17.27	20.51	20.55	17.16	18.72	18.47	19.01	20.33	18.83	17.46	18.98	19.04	17.92	18.78	19.35	19.42	18.62	18.97	17.58	19.29	18.5	20.09	21.59	18.83	18.32	19.21	18.47	18.41	19.21	19.52	19.12	18.9	19.06	19.03	18.89	18.93	18.73	20.36
0.468384	-1.09424	0.517421	0.871788	1.17212	972.608	401	12.71	18.51	18.63	17.04	16.48	18.13	12.15	19.17	18.87	16.28	17.77	17.85	19.19	12.51	12.49	18.62	18.22	19.74	18.43	19.13	12.57	13.31	19.52	18.86	18.58	19.04	17.61	18.81	12.35	19.35	19.29	19.68	18.31	17.79	12.52	14.38	18.93	18.82	13.35	17.14	18.18	18.7	17.98
1.32223	0.402968	0.0615049	0.564845	1.17193	915.087	429.2	15.52	18.54	18.85	18.66	17.44	18.92	18.13	17.94	18.33	18.51	18.54	18.25	18.51	18.52	18.22	18.42	18.54	18.24	18.09	15.74	17.97	15.69	18.44	18.05	18.55	18.19	17.58	18.06	17.66	18.48	18.94	17.58	17.37	17.46	17.65	16.75	18.85	18.23	15.77	17.28	18.07	19.2	15.94
2.22865	1.15617	0.260431	0.783832	1.17142	866.589	47.5	17.36	18.05	17.82	20.03	16.26	20.1	17.25	18.55	18.19	12.51	18.61	13.35	13.56	17.94	18.59	14.33	13.74	13.14	13.11	14.11	19.17	18.92	12.36	19.6	17.14	16.32	13.05	19.32	13.32	19.85	17.72	18.57	19.02	18.69	13.54	18.99	19.07	13.69	14.25	19.08	12.81	12.22	14.17
0.620224	-0.68914	0.429841	0.83949	1.16923	1006.69	446.5	17.69	17.53	19.19	18.59	15.15	19.27	16.92	17.8	19.29	14.73	15.41	15.29	15.44	19.14	15.31	19.27	19.07	19.73	17.64	19.21	17.32	15.56	17.59	15.31	18.66	17.21	16.77	15.88	15.41	18.2	18.88	19.21	17.91	18.05	17.61	15.72	19.65	19.45	15.59	18.32	17.72	19.07	19.74
1.38195	0.46671	0.0681025	0.574409	1.16705	932.689	543.4	14.41	16.86	16.27	16.76	17.28	16.46	13.99	15.04	16.41	16.86	16.72	17	16.59	14.2	17.22	15.1	17.18	16.48	15.63	14.78	14.27	14.83	16.62	16.32	14.28	14.13	16.59	17.26	16.93	16.13	14.24	14.82	16.27	16.09	14.48	15.07	15.97	17.26	14.82	14.54	16.5	15.31	14.94
0.686419	-0.542839	0.34634	0.807281	1.16611	1004.67	412.4	17.45	16.01	18.77	19.21	18.91	19.89	18.79	19.39	19.95	19.28	16.39	16.34	18.82	19.48	16.45	18.55	18.73	19.97	18.13	19.63	18.18	17.94	19.6	19.25	19.36	18.74	18.98	18.95	17.56	19.86	19.43	20.34	18.71	20.12	16.58	16.64	20.38	20.03	16.52	19.39	18.85	19.92	16.64
0.667878	-0.582344	0.0953261	0.61062	1.16585	1132.71	46.3	18.27	18.53	15.5	18.33	18.66	19.48	17.66	15.29	15.35	19.22	16.73	15.55	15.72	17.82	18.4	20.08	15.73	17.6	15.43	17.12	18.17	16.9	18.67	17.22	18.24	18.6	17.78	18.28	15.67	18.88	18.91	18.35	18.2	18.25	18.17	19.29	20.03	17.71	17.67	19.65	18.56	18.7	18.06
1.8882	0.917011	0.167482	0.694957	1.16573	301.074	557.4	14.67	14.55	15.15	14.87	14.95	14.03	14.21	16.62	15.32	14.22	16.11	11.49	14.62	15.28	16.17	11.13	15.47	13.46	14.16	10.92	15.99	15.47	9.42	15.18	10.43	13.21	15.64	15.15	17.26	15.34	10.51	11.43	13.88	14.52	16.17	11.33	15.85	16.33	16.58	12.68	16.44	10.13	10.9
2.30518	1.20488	0.156018	0.691709	1.16532	482.939	67.1	16.97	14.95	15.84	15.3	16.1	15.29	16.69	14.98	15.59	14.03	15.95	17.79	9.97	9.86	9.86	10.78	15.53	15.41	16.13	10.61	10.25	11.78	15.7	14.37	15.64	16.34	15.32	13.32	14.72	15.01	10.21	11.01	13.36	12.36	17.48	10.99	15.22	8.84	16.67	17.18	9.35	8.63	10.66
0.555372	-0.848473	0.29985	0.792819	1.16494	1499	417.3	18.27	19.66	13.88	19.82	13.44	18.01	19.88	19.45	19.84	20.11	18.39	13.81	19.04	19.41	13.95	19.84	14.22	19.5	20.04	18.58	18.79	20.1	18.85	18.03	19.6	19.45	19.24	19.53	19.94	19.18	18.68	18.11	18.77	14.41	18.08	14.82	19.81	19.15	18.01	19.43	18.5	18.88	18.82
1.60599	0.683462	0.300882	0.792819	1.16493	816.779	40.6	17.52	17.62	18.34	17.38	16.64	18.53	17.05	13.05	17.71	18.12	18.87	16.16	18.14	18.13	18	14.52	18.43	14.43	16.58	16.69	16.04	17.14	16.84	17.77	16.69	17.56	18.62	16.89	16.41	16.17	16.63	18.69	13.11	18.43	17.34	15.87	16.53	18.28	17.43	17.04	13.04	17	17.68
1.62494	0.700387	0.109836	0.612862	1.1641	223.169	307.7	17.56	16.99	16.9	17.73	17.34	17.42	16.74	17.3	17.85	16.19	17.6	17.74	17.59	14.92	14.11	14.89	17.96	18.04	17.73	17.89	17.62	14.63	17.18	14.15	14.02	13.95	17.08	13.01	14.06	13.18	17.29	14.66	17.62	13.35	18.34	18.08	17.14	17.52	17.92	17.31	17.4	16.33	14.73
0.726434	-0.461097	0.199147	0.71858	1.16372	279.636	431.5	17.29	16.82	12.66	17.68	16.81	17.63	17.06	17.7	18	18.23	16.15	17.86	18.34	17.33	16.28	14.71	18.51	18.42	17.08	18.74	17.07	17.45	17.14	17.15	17.59	17.74	16.41	17.87	17.26	17.87	17.95	17.41	17.62	17.42	16.56	17.59	17.93	17.66	17.38	17.56	15.75	18.27	18.1
1.61187	0.688731	0.0889747	0.603355	1.16311	459.422	406.5	17.31	16.94	17.74	15.98	16.99	16.18	15.83	17.53	18.16	16.82	17.49	17.32	18.22	17.77	17.28	16.52	17.54	18.34	17.2	13.72	17.28	16.26	17.88	18.01	13.07	17.27	17.12	16.99	14.98	16.05	13.03	18.94	18.14	17.56	13.09	18.23	16.88	17.39	14.57	16.84	18.42	16.49	13.73
0.717138	-0.479677	0.0630258	0.567262	1.16284	372.289	448.4	15.74	13.52	12.99	15.11	13.62	14.84	14.85	12.88	14.67	15.42	15.19	15.81	15.31	13.69	13.41	15.2	14.63	14.51	14.18	14.54	13.55	14.76	14.38	14.96	14.94	15.18	15.36	15.9	15.94	13.75	14.23	17.49	17.21	16.61	14.42	14.86	14.19	12.49	14.81	12.74	14.98	14.81	16.8
0.513728	-0.960925	0.76108	0.952462	1.15988	453.315	454.9	10.32	15.29	15.03	13.46	15.53	17.5	13.09	16.89	14.78	13.62	16.23	10.51	17.28	14.37	10.47	16.3	16.71	16.45	16.04	16.53	10.63	11.08	16.42	16.35	14.55	12.6	17.25	14.98	11.33	15.34	16.81	16.71	15.68	13.69	10.21	16.13	16.7	15.99	17.03	16.88	15.24	13.33	17.5
0.530466	-0.914667	0.0434791	0.504913	1.15505	682.896	43.5	18	17.2	17.81	16.53	18.69	12.33	18.73	15.64	12.23	16.06	18.14	12.65	12.93	13.71	17.03	17.87	17.65	17.29	19.48	18.07	17.15	18.95	17.45	13.05	15.58	19.2	17.52	16.82	18.08	16.69	16.77	13.88	16.01	17.26	15.29	16.35	16.8	16.9	17.39	18.64	12.22	17.84	13.54
1.61764	0.693892	0.378349	0.817691	1.15263	131.929	372.6	19.82	19.06	18.66	18.93	18.66	17.53	19.91	18.64	13.58	19.37	19.13	20.25	18.38	19.84	19.8	13.96	19.02	18.45	18.27	13.73	19.99	19.23	18.12	19.34	18.44	18.01	18.56	18.41	20.08	16.96	18.22	17.83	18.09	18.63	18.51	18.21	17.49	18.05	19.07	19.41	17.86	18.23	13.75
1.6574	0.728925	0.100659	0.61062	1.15095	678.411	396	17.46	16.82	18.79	18.94	18.24	18.32	16.56	17.5	18.95	16.92	17.1	18.85	18.15	13.68	13.77	19.04	18.41	16.17	17.05	14.33	17.59	18.5	18.16	19.1	16.96	15.49	16.91	16.54	14.82	18.3	13.73	14.43	17.42	16.9	17.33	18.96	18.31	15.25	14.45	14.05	16.54	17.8	14.46
0.601584	-0.733161	0.120479	0.632253	1.1499	167.143	383.1	16.55	16.82	12.5	15.95	11.85	12.25	18.11	16.41	16.98	14.99	16.62	12.53	14.78	17.68	17.61	17.7	17.29	12.35	17.62	17.61	16.59	16.98	16.27	15.69	16.87	16.44	14.96	17.08	17.28	17.74	16.76	13.8	14.32	16.33	13.81	16.04	17.3	15.01	13.62	15.59	17.28	17.3	17.26
1.88772	0.916645	0.101924	0.610923	1.1496	284.33	396.4	15.81	20.66	19.93	20.44	20.06	19.64	15.4	20.23	20.77	20.92	17.86	21.39	20.03	15.66	17.64	21.13	17.11	20.53	21.04	16	15.81	21.66	19.55	18.23	15.69	15.54	18.74	20.76	16.95	19.89	15.61	15.76	19.14	19.37	16	16.1	19.94	19.09	16	15.82	19.73	19.32	16.17
1.46149	0.547441	0.194509	0.711101	1.14789	184.169	350	17.37	15.98	14.03	17.66	17.09	17.45	17.3	16.97	16.82	17.13	17	16.88	16.79	13.99	16.4	17.92	14.42	13.82	16.61	16.03	14.01	14.64	16.11	16.13	16.95	13.98	17.08	15.81	14.09	17.35	16.77	14.67	17.28	17.07	17.41	14.92	17.26	16.88	15.41	18.02	13.69	15.9	16.44
0.724855	-0.464237	0.362916	0.811688	1.14775	520.599	48.3	16.2	17.69	18.37	18.87	18.57	18.5	15.83	18.55	18.77	18.84	18.51	17.48	17.8	20.27	18.88	17.49	18.87	18.26	18.63	16.33	18.39	18.94	18.55	19.44	20.42	19.62	20.27	19.15	18.44	18.89	18.3	18.83	19.16	18.91	20.62	18.7	19.42	18.2	18.87	18.34	18.86	19.89	16.47
2.04419	1.03153	0.191065	0.707381	1.1463	869.818	41.4	16.99	16.51	18.83	17.01	19.07	17.76	17.7	17.77	16.91	17.66	17.29	18.23	12.72	18.38	14.38	20.45	19.48	16.07	12.25	17.49	19.28	13.45	11.74	12.78	18.33	12.72	16.48	19.35	17.33	18.15	17.53	17.79	17.6	12.09	18.69	17.19	17.39	17.96	13.49	13.12	18.39	15.35	13.36
0.692885	-0.529312	0.434005	0.842164	1.1462	401.344	371.3	19.87	19.74	20.08	19.21	20.34	20.66	20.09	21.16	20.32	20.67	20.11	20.87	20.12	19.5	14.28	19.77	19.5	20.27	19.88	19.62	18.07	17.83	21.16	20.1	19.61	20.59	20.3	20.17	20.61	21	20.57	21.24	21.07	21.55	18.84	19.68	19.96	20.63	20.68	20.5	19.52	21.19	21.32
0.717266	-0.479419	0.101295	0.61062	1.1457	221.938	40.2	15.7	18.12	17.14	16.16	15.71	13.51	15.65	14.54	15.37	14.76	16.58	15.42	15.84	17.6	15.47	16.08	17.57	15.79	16.22	16.9	16.07	18.92	15.71	16.02	15.43	15.5	15.76	15.45	16.14	15.5	17.74	15.85	15.58	15.36	16.96	16.15	15.63	15.46	16.78	15.51	18.24	14.87	18.67
1.70362	0.768602	0.444824	0.846609	1.14539	467.346	345.9	21.56	20.78	19.13	18.85	20.5	20.82	21.41	20.44	19.75	18.69	22.23	22.07	19.98	21.37	23.02	20.95	18	20.46	20.88	19.39	21.31	21.38	19.05	20.01	18.04	21.28	21.13	20.87	14.76	21.5	20.71	21.33	20.65	22.04	20.97	19.46	19.73	14.02	21.24	19.58	20.38	19.78	21.37
1.63368	0.708129	0.206378	0.722593	1.14436	824.252	295	15.13	17.83	18.32	18.34	14.91	18.29	17.68	15.86	17.84	14.45	20.14	18.11	18.21	19.01	16.46	15.76	18.55	14.94	14.97	17.97	19.35	18.43	17.21	15.12	18.12	14.86	14.82	14.5	15.22	17.97	17.75	15.26	14.92	19.26	17.92	15.57	18.51	17.87	15.42	18.35	14.94	14.52	15.62
0.762231	-0.391699	0.101336	0.61062	1.14412	619.439	487.2	16.04	16.46	17.18	17	16.32	16.72	16.05	16.76	14.5	17.17	14.92	14.73	16.71	15.82	16.13	16.79	16.13	17.47	15.92	16.99	16.79	16.07	16.77	14.81	16.88	15.72	16.45	17.26	17.56	13.99	17.21	16.58	17.97	17.39	17.52	16.88	15.46	15.67	15.16	15.89	16.41	17.23	17.71
1.35001	0.432968	0.361705	0.811688	1.14325	363.035	70.5	20.17	19.97	18.84	19.82	19.6	19.74	20.05	19.48	19.23	19.33	19.73	20.04	19.79	17.08	20.11	18.32	19.44	19.61	19.88	17.25	20.18	19.31	18.49	17.16	19.62	19.89	20.01	19.75	19.93	19.52	17.04	19.21	19.66	19.55	17.36	19.77	19.54	16.84	19.84	19.06	20.03	19.55	19.6
1.56585	0.646946	0.15631	0.691709	1.14325	520.433	582.4	18.48	16.87	17.82	17.29	19.09	18.49	14.83	17.4	15.03	16.72	18.37	15.24	16.37	17.98	18.25	19.05	17.08	15.09	15.12	15.56	15.25	15.52	14.76	17.77	17.59	15.03	14.95	19.38	18.72	17.52	17.09	17.36	15.08	14.8	15.43	18.28	18.72	18.16	15.55	17.91	17.79	14.71	15.76
0.585754	-0.771634	0.187465	0.707381	1.1405	409.161	354.2	18.84	19.06	18.86	18.71	19.26	19.2	19.06	19.68	12.13	17.1	13.1	16.74	13.84	15.49	19.47	18.61	18.57	18.69	17.74	17.4	19.48	19.53	19.3	19.06	18.84	18.89	19.51	19	19.31	19.13	18.81	18.34	19.61	18.62	19.39	17.31	14.84	16.2	17.2	15.7	16.95	16.08	17.67
0.74046	-0.433505	0.0987811	0.61062	1.14048	332.244	284.1	18.4	17.68	16.33	19.44	16.32	16.25	19.16	18.52	18.71	18.87	19.24	19.22	16.47	18.13	18.78	17.69	16.49	18.36	16.27	18.2	18.56	18.22	18.7	18.34	20.43	18.24	19.66	18.09	19.25	17.78	19.47	18.18	19.16	19	18.43	18.21	18.43	18.77	18.74	17.69	19.11	17.88	19.8
1.52904	0.612624	0.0644174	0.568585	1.13921	1191.55	435.9	14.04	17.88	16.38	16.9	17.12	16.96	18.1	16.92	18.12	17.05	17.42	16.66	16.35	13.83	19.04	14.78	17.06	18.26	14.76	14.5	16.38	14.53	16.21	17.6	13.88	16.81	16.42	15.23	17.31	16.67	18.33	14.55	16.47	17.32	14.03	14.81	17.7	17.51	17.88	14.19	16.6	17.96	16.16
1.62957	0.704495	0.206974	0.722918	1.13904	168.123	267.2	17.55	17.44	16.2	17.02	16.16	17.49	17.17	17.22	16.08	17.64	17.18	13.7	16.62	17.78	16.59	17.82	14.06	17.63	13.52	14.38	13.8	18.4	17.19	16.88	17.62	13.75	17.2	17.28	17.61	17.34	17.24	17.05	17.66	13.04	14.99	17.82	13.24	12.89	17.38	17.67	17.95	17.25	14.51
0.636853	-0.650968	0.0722652	0.574409	1.13858	378.359	479.5	16.29	17.17	13.3	16.4	15.31	12.99	17.1	16.42	16.78	16.4	17.1	19.08	19.16	18.93	15.97	14.33	17.08	17.47	16.65	17.31	17.3	17.16	17.27	14.45	13.44	17.05	16.12	16.42	17.22	18.39	16.16	17.11	18.52	18.16	17.09	17.58	17.26	16.22	17.47	18.36	18.93	18.92	18.86
1.45378	0.539806	0.0414808	0.501884	1.1364	398.236	273	12.81	15.49	15.65	12.85	14.64	14.22	12.22	14.34	15.01	13.56	15.47	13.47	16.06	12.56	15.91	13.57	12.93	14.91	14.57	13.27	12.66	13.35	13.18	15.59	12.67	12.66	15.52	15.03	12.4	15.15	12.67	13.6	14.56	12.02	12.61	13.69	14.96	15.83	13.43	13.06	16.57	14.6	13.29
1.54305	0.625785	0.105	0.612125	1.13632	592.184	389.2	13.05	16.09	15.89	16.17	15.19	15.67	15.42	16.46	15.77	16.11	16.91	15.76	15.56	13.66	18.23	13.78	16.43	15.96	15	13.53	17.62	13.61	16.69	13	12.87	15.74	12.46	16.32	15.42	16.43	14.91	13.85	15.58	16.93	12.85	13.9	15.3	17.43	13.66	16.72	16.37	15.72	13.51
1.47418	0.559914	0.447486	0.846936	1.13547	334.587	438.6	14.4	17.61	17.68	13.87	16.22	13.98	17.33	16.63	16.93	16.94	16.77	16.45	17.42	17.15	15.53	15.08	16.46	14.08	15.9	16.07	16.11	15.79	14.84	15.66	17.37	15.99	14.04	15.83	17.16	13.53	16.39	14.82	13.96	17.15	17.19	17.11	18	13.54	14.81	17.76	13.95	15.26	16.94
0.676535	-0.563763	0.485619	0.868927	1.13505	265.619	384.1	13.32	14.38	16.9	14.88	14.25	15.39	15.03	16.6	15.75	14.51	12.59	15.48	16.15	15.32	12.25	13.23	16.57	16.58	15.78	15.96	15.11	14.72	16.67	15.03	15.45	16.39	14.74	15.38	14.03	15.02	15.69	15.86	13.83	14.85	17.18	13.33	15.49	14.8	17.41	16	11.63	16.13	16.76
2.0531	1.03781	0.404941	0.826035	1.13431	182.154	285.3	17.4	12.31	17.11	17.3	16.76	16.35	17.24	16.87	15.56	16.43	14.14	17.33	12.17	11.93	17.23	13.05	12.36	11.62	12.8	16.93	17.55	15.4	11.16	12.25	16.07	12.2	11.66	10.38	16.89	16.74	17.47	17.86	17.22	11.6	17.77	13.18	17.35	10.92	16.43	17.37	11.52	15.12	17.31
0.670511	-0.576667	0.20885	0.725971	1.13248	362.854	41.9	14.62	16.34	18.79	14.16	16.47	17.36	15.39	14.13	16.36	17.11	18.71	14.52	14.68	14.39	18.37	15.27	16.85	18.31	14.37	18.35	17.38	16.06	16.27	16.05	16.59	16.21	16.29	15.08	16.63	17.84	16.76	18.95	14.26	17.78	16.18	15.2	15.72	16.35	17.31	16.09	17.73	17.64	17.35
1.5856	0.665032	0.16613	0.694957	1.132	172.133	293.1	18.48	14.79	18.22	17.69	18.4	15.15	19.06	18.36	15.07	18.22	17.93	18.08	18.44	18.76	16.39	15.89	17.95	15.13	15.15	15.59	15.29	15.55	18.4	18.41	19.22	15.08	19.31	18.64	18.87	16.54	18.12	15.4	17.91	14.84	19.14	18.06	14.93	17.8	18.67	15.36	15.16	17.75	15.79
0.673125	-0.571054	0.180928	0.703149	1.13172	110.06	279.2	18.18	14.65	16.66	14.94	18.14	17.66	18.12	14.85	17.92	17.22	17.72	17.89	18.73	15.03	16.95	19.47	16.29	18.28	18.79	18.43	18.54	18.88	17.27	15.17	18.34	17.82	17.94	18.53	17.96	17.66	18.28	17.62	18.3	14.68	18.32	17.68	17.9	17.42	17.72	15.26	15.03	17.85	18.19
0.739358	-0.435656	0.404633	0.826035	1.13128	286.625	375.8	16.66	17.99	18.82	16.86	16.94	17.61	17.03	18.11	18.32	18.19	16.97	18.72	19.02	17.44	17.49	16.09	19.22	19.49	17.94	19.56	17.45	16.55	19.38	18.31	17.97	18.84	18.05	17.23	16.68	18.68	18.79	18.15	18.09	18.75	15.04	17.8	18.28	18.68	17.73	17.75	17.85	18.62	17.72
0.704361	-0.505613	0.795111	0.963222	1.13102	195.072	361.5	14.11	15.65	14.51	13.32	16.93	16.6	15.45	16.38	16.71	13.18	16.1	15.88	16.61	16.12	13.69	15.34	16.98	15.33	17.07	15.49	16.82	14.72	17.59	16.45	15.99	15.12	15.62	15.93	15.96	12.2	16.5	16.79	15.74	13.42	15.88	16.59	16.4	17.26	16.09	15.95	15.56	15.23	17.72
1.38732	0.472301	0.180022	0.703149	1.13073	233.201	280.2	15.85	15.86	16.59	19.18	16.77	16.93	16.38	17.27	18.81	16.77	18.19	16.2	16.55	16.67	17.3	17.24	16.67	15.45	17.12	16.27	16.83	14.09	15.64	16.57	20.16	14.85	15.89	16.71	16.97	16.17	15.76	14.57	16.83	17.07	16.59	18.95	15.94	17.2	17.9	16.87	15.98	16.71	16.7
1.42911	0.515118	0.267882	0.786816	1.13072	466.007	70.3	16.9	14.89	15.68	16.26	16.67	16.57	16.68	16.34	15.77	16.29	17.03	16.89	14.41	16.51	16.69	14.18	16.69	16.82	16.93	16.75	15.43	17.29	15.15	13.43	13.3	16.57	16.69	15.85	16.56	16.41	13.28	14.16	14.79	12.57	17.43	15.95	16.02	16.27	17.29	16.92	16.43	15.58	13.99
1.30647	0.385677	0.488835	0.87101	1.1307	129.958	364	17.68	17.3	17.78	17.47	17.26	17.12	17.53	17.05	16.72	18.01	18.83	18.2	17.82	17.35	18.57	14.92	18.17	17.21	17.48	17.41	18.09	17.78	17.45	14.16	17.34	18	17.91	17.53	18.05	17.66	17.5	17.52	17.73	17.39	18.02	17.26	17.73	16.88	14.66	17.85	17.65	17.36	15.61
1.44135	0.527419	0.290152	0.789603	1.1297	186.018	287.2	18.94	18.48	18.71	18.83	19.24	17.62	18.69	15.59	18.72	18.63	18.98	19	18.55	19.29	18.83	15.5	18.12	18.76	14.68	18.77	18.52	15.16	18.85	18.96	19.1	17.73	18.52	17.73	14.96	18.8	18.8	18.61	18.21	17.95	18.54	19.08	18.55	18.83	18.65	18.69	19.01	18.46	18.57
1.62829	0.703355	0.234515	0.752671	1.12921	454.21	577.6	14.18	13.26	14.64	13.09	12.64	12.63	14.63	15.15	10.51	14.03	14.48	14.49	14.01	11.04	14.23	15.16	13.94	10.73	14.53	11.88	15.42	14.62	12.99	14.01	12.2	11.33	14.07	9.01	13.77	10.47	11.23	12.12	10.61	15.37	14.72	12.21	13.17	13.75	11.72	11.55	10.54	15.76	11.55
0.605101	-0.724753	0.172859	0.701834	1.12887	640.37	298.9	15.9	16.73	17.38	17.07	15.29	15.79	15.93	16.3	12.92	11.33	12.82	17.85	16.98	16.84	12.51	13.53	12.89	15.18	16.62	16.6	17.67	16.86	15.91	12.68	15.96	16.78	16.51	15.91	16.17	18.16	16.78	17.4	16.7	17.45	16.57	17.54	16.58	16.34	16.73	15.54	16.59	17.08	17.81
0.673406	-0.570452	0.185063	0.704908	1.12852	606.199	383	13.85	13.44	15.26	17.12	14.45	14.61	16.58	15.26	15.43	14.72	13.16	12.61	15.84	16.31	12.85	15.19	15.4	15.77	15.98	17.51	14.52	14.69	15.96	16.07	14.47	15.55	13.95	14.61	15.31	15.44	15.95	15.45	13.99	16.49	15.51	13.92	15.06	14.6	13.67	13.3	12.18	16.23	17.61
0.73539	-0.443419	0.294807	0.792819	1.12715	858.748	40.9	17.53	16.31	16.87	16.68	16.56	17.47	18.13	19.13	16.51	15.77	17.14	18.16	17.55	17.64	16.31	18.19	17.72	17.69	16.98	17.87	18.95	17.67	16.28	17.03	18.14	18.53	16.58	18.13	18.13	16.57	18.7	17.09	15.77	16.16	15.13	18	18.98	18.96	18.34	16.33	18.3	18.53	18.23
0.757734	-0.400237	0.352961	0.808903	1.12598	775.539	590.7	14.02	13.22	17.15	17.04	16.57	16.94	16.42	16.24	16.01	17.58	15.62	16.68	14.07	16.95	16.73	16.95	17.04	16.77	16.23	17.02	16.5	15.22	16.55	17.01	16.56	16.51	16.48	16.61	16.73	16.12	16.46	16.84	16.31	16.2	17.11	17.22	16.46	17.03	15.9	16.81	13.38	16.51	16.62
1.34812	0.430946	0.315487	0.792819	1.12574	122.096	583.4	20.21	18.25	19.72	20.19	20.4	19.97	21.13	20.17	19.9	20.31	20.75	20.45	20.06	19.43	18.6	20.7	18.33	19.92	20.18	18.35	21.08	19.86	18.25	18.42	21.37	18.25	18.27	18.3	18.61	20.59	20.44	20.64	18.31	18.16	18.58	20.34	20.98	19.89	18.35	20.57	19.6	18.25	20.62
0.767327	-0.382086	0.166363	0.694957	1.12558	709.516	565.8	17.79	17.56	15.77	18.27	18.24	17.76	17.6	17.76	17.71	15.38	15.89	15.79	17.17	17.74	15.85	17.3	18.01	17.73	15.65	17.54	17.64	16.91	15.38	15.81	18.23	18.36	17.83	18.05	17.76	17.46	17.6	17.89	18.24	17.85	16.05	17.86	17.43	17.9	16.03	17.17	17.58	17.83	18.42
1.68999	0.757011	0.134129	0.659287	1.12517	206.066	559	15.65	15.39	15.51	14.53	16.28	15.36	14.67	15.8	16.07	16.75	16.11	16.01	16.61	15.67	16.4	16.03	17.02	15.9	16.56	10.76	15.86	16.03	16.24	12.64	16.29	15.29	16.05	16.72	16.69	16.32	10.35	15.26	14.51	15.14	16.16	11.22	10.73	16.52	10.86	14.41	17.1	16.97	16.46
0.753701	-0.407935	0.30207	0.792819	1.12466	1199.91	418.2	18.42	18.29	19.56	19.07	18.5	18.93	18.85	19.03	19.08	17.06	19.17	16.24	15.4	18.18	16.53	18.65	15.44	18.99	17.53	19.23	18.45	19.17	18.98	18.54	19.03	18.57	18.05	18.5	18.22	19.06	18.65	18.8	19.39	19.08	17.46	17.47	19.15	18.82	18.18	18.67	18.23	18.79	19.28
2.13074	1.09135	0.0292472	0.448193	1.12364	1281.91	424.3	14.86	20.63	20.86	20.85	19.9	21.15	14.34	20.37	20.31	19.35	19.47	19.22	21.58	14.64	15.85	18.98	19.6	19.44	20.25	15.15	14.76	18.05	20.86	19.88	14.71	14.52	20.57	19.61	19.9	20.41	14.67	15.1	19.96	19.93	14.97	15.35	20.28	19.7	15.17	14.92	20.14	14.13	15.33
1.53967	0.622624	0.142713	0.675673	1.12341	354.931	373.6	18.12	16.14	19.85	16.16	18.86	19.15	18.37	18.89	18.58	19.16	18.13	19.56	18.01	18.16	19.18	16.31	18.37	17.38	19.64	15.11	20.01	18.42	17.26	14.79	19.22	16.79	18.6	18.86	18.47	18.13	14.62	18.58	17.23	19.33	17.68	19.55	17.57	17.55	19.27	14.88	19.51	17.21	18.73
1.87069	0.90357	0.226509	0.749052	1.12243	1253.34	299.5	13.48	16.66	18.33	19.07	15.36	12.9	16.73	16.35	15.64	14.79	16.85	14.32	17.75	17.43	17.35	18.17	13.67	17.76	17.6	17.65	17.17	16.27	12.3	16.43	13.39	18.33	17.45	12.06	13.24	17.54	16.47	19.56	12.83	12.66	16.53	17.46	15.46	17.08	14.16	13.77	12.76	12.17	14.09
0.645262	-0.632043	0.155829	0.691709	1.12239	327.307	494.4	12.05	14.17	14.71	16.32	16.39	15.01	15.17	12.62	15.17	16.78	16.16	16.65	14.27	13.92	13.01	17.29	17.13	17.07	16	16.28	16.56	15.64	15.08	15.48	15.8	12.06	15.68	16.59	17.47	14.41	15.43	13	15.51	16.28	11.92	16.87	14.72	13.15	15.04	13.34	15.04	15.98	15.89
1.48497	0.57043	0.098432	0.61062	1.12207	346.008	64.7	21.54	24.08	24.47	24.43	24.65	24.29	21.38	24.29	23.42	24.65	24.08	24.21	24.29	21.39	25.13	22.9	24.47	24.04	24.38	21.14	21.61	22.68	23.94	24.47	21.34	24.65	24.51	24.21	24.21	23.26	21.14	21.08	24.18	23.77	21.61	24.21	24.25	24.14	21.33	21.28	24.89	23.69	21.35
0.666634	-0.585032	0.766924	0.955111	1.12119	1088.68	395.7	18.66	19.68	20.03	20.09	19.22	21.37	19.84	21.32	21.18	19.47	19.74	19.05	21.09	20.96	19.41	20.59	21.74	22.71	20.87	22.99	19.48	19.95	21.41	20.02	20.58	20.45	20.2	20.11	18.43	21.84	22.88	21.99	20.71	20.16	16.6	19.43	21.64	23.16	20.35	20.49	16.48	21.32	21.8
0.60862	-0.716387	0.50053	0.871629	1.12034	1079.63	396.8	17.6	16.03	18.94	17.69	15.24	18.66	18.69	18.71	20.18	14.83	17.94	19.5	19.61	18.77	15.39	19.18	19.79	20.66	19.16	21.63	15.38	15.64	18.92	19.12	18.97	16.99	18.19	17.7	15.49	19.76	20.16	18.99	19.5	18.84	15.57	18.52	18.8	20.37	18.21	19.56	15.28	19.25	17.15
0.710424	-0.493247	0.434245	0.842164	1.12034	1506.48	417.1	19.14	16.96	20.09	18.25	18.77	18.34	19.3	19.07	19.59	18.05	19.51	15.87	20.44	16.8	15.96	18.86	18.52	18.23	19.89	19.66	18.4	17.44	19.23	19.24	17.92	19.71	19.01	18.58	17.54	19.05	19.94	19.87	18.99	18.86	16.13	16.19	19.68	19.86	19.93	19.07	20.05	19.57	19.6
1.41512	0.500925	0.0959088	0.61062	1.12016	200.995	553.7	18.54	17.54	15.06	17.08	18.01	17.27	16.9	17.1	17.96	17.22	17.92	15.16	16.31	17.76	18.45	15.79	17.41	17.46	15.02	18.36	16.79	15.45	16.96	18.13	16.6	14.95	14.87	17.88	18	17.46	17.5	15.31	18.04	14.69	17.81	15.61	16.21	17.89	17.76	18.04	17.73	16.95	15.69
0.728168	-0.457656	0.183662	0.704727	1.11978	515.312	415.3	18.84	20.91	18.51	21.82	21.46	21.56	20.83	18.64	21.29	21.77	20.85	21.01	21.24	18.71	19.95	21.6	18.61	21.52	21.55	21.28	18.89	21.44	21.39	21.52	21.81	21.01	21.23	21.33	21.83	21.18	21.26	21.44	21.41	20.98	18.89	21.11	21.25	21.52	21.38	21.08	21.12	21.6	18.71
0.781479	-0.35572	0.18061	0.703149	1.11971	547.273	558.1	17.48	14.2	14.7	16.68	16.63	16.22	16.66	16.58	16.39	17.45	16.73	17.43	14.92	16.68	14.74	16.34	14.99	16.72	16.84	15.13	16.99	17	16.13	17.06	16.43	16.68	16.27	16.67	16.98	16.97	16.26	16.5	16.67	15.86	17.48	17.67	14.37	16.95	16.81	16.67	16.84	16.93	17.06
0.738289	-0.437742	0.139099	0.667896	1.11896	133.976	37.5	15.29	15.18	13.38	15.2	15.32	15.58	15.41	12.85	14.39	12.55	15.36	15.44	15.88	14.88	15.89	17.7	13.78	15.27	16.16	15.59	15.09	15.23	14.9	15.76	15.2	14.87	15.01	14.21	13.39	14.53	15.14	16.1	15.4	14.47	15.59	17.58	15.18	15.85	15.69	16.83	14.62	13.72	16.16
0.627514	-0.67228	0.693384	0.93501	1.11871	537.287	382.1	14.35	16.68	12.95	12.41	16.27	16.35	17.16	17.26	16.08	12.01	13.48	15.52	16.41	15.93	13.18	17.72	16.98	12.7	15.95	17.29	16.47	13.89	17.13	15.98	15.31	13.15	16.43	15.6	15.05	16.23	17.22	15.3	16.13	17.1	15.77	14.15	16.54	17.14	16.98	16.33	12.53	14.92	16.81
3.73742	1.90204	0.36054	0.811688	1.11862	953.558	342.8	18.2	17.63	15.12	7.81	9.01	18.06	18.77	8.42	17.81	14.67	18.15	18.76	8.92	19.68	20.94	9.65	15.86	14.48	8.63	9.47	17.27	19.6	7.93	9.15	9.01	18.43	18.27	14.74	8.52	19.16	17.16	14.98	17.37	18.18	17.22	9.86	8.73	7.16	17.44	15.29	8.17	7.16	17.31
1.30258	0.381376	0.361086	0.811688	1.11851	582.411	519.7	17.23	16.8	17.24	16.75	16.67	16.74	16.05	16.95	16.43	17.57	14.06	17.45	16.81	16.85	17.69	16.58	16.99	16.66	16.35	14.29	17.51	16.73	15.95	13.81	15.94	16.77	15.86	16.69	16.71	16.1	15.76	17.27	16.34	16.84	17.37	17.01	16.48	16.54	17.62	16.95	16.77	16.78	14.43
0.658791	-0.602108	0.383875	0.818486	1.11509	1027.17	424.6	16.53	15.9	18.58	18.12	13.72	17.41	18.06	18.61	18.52	18.98	17.53	14.06	15.3	17.5	14.15	17.37	19.05	18.77	16.71	17.29	17.23	17.02	18.79	17.97	17.47	18.01	17.1	17.56	17.65	17.9	17.87	16.8	18.6	18.88	14.27	17.42	18.01	16.8	14.68	17.56	17.79	18.44	18.89
0.68181	-0.552559	0.0705949	0.574409	1.11494	392.795	46.4	17.23	17.16	17.63	16.09	18.64	15.03	18.02	14.88	18.41	17.07	17.4	15.18	15.33	19.1	17.69	19.8	16.8	17.41	15.05	15.49	17.85	16.87	16.24	16.79	17.72	18.14	16.25	17.7	15.3	18.2	17.33	17.34	17.39	17.77	18.46	17.59	19.3	17.47	19.45	18.23	19.47	17.07	15.71
1.29283	0.370538	0.144281	0.676377	1.11383	127.111	290.9	17.82	17.75	18.03	17.53	17.95	18.18	18.35	17.31	16.69	17.5	17.25	17.69	18.14	18.28	16.23	18.66	17.41	18	17.5	16.52	18.63	17.93	17.28	17.81	17.57	18.58	17.04	18	14.78	16.53	17.77	16.29	17.21	17.3	17.88	18.14	17.2	17.72	17.63	14.85	15.61	16.41	18.18
1.45042	0.536473	0.214229	0.73469	1.11349	437.19	373.8	17.66	20.3	21.17	21.16	20.68	20.57	20.78	20.6	21.9	22.37	21.51	21.75	21.81	20.65	21.5	21.34	20.24	21.38	21.97	17.62	17.68	21.35	21.51	21.15	20.5	20.78	18.72	20.9	20.98	20.98	20.58	19.81	18.47	20.42	21.27	22.08	21.3	20.55	21.91	21.16	21.46	20.66	17.7
1.33343	0.41514	0.252857	0.779359	1.11301	318.226	286.5	17.6	15.89	18.27	17.91	17.76	17.6	17.67	16.85	17.76	18.18	17.78	18.16	17.94	15.13	17.69	15.86	15.43	18.13	17.93	17.54	17.94	15.52	17.57	17.48	15.15	17.09	18.11	16.66	18.23	17.36	18.28	15.38	17.73	18.34	17	15.68	16.37	17.52	17.76	16.99	18	17.51	15.76
1.63476	0.709075	0.169844	0.699356	1.11225	371.922	38.1	15.48	14.67	14.94	14.86	17.19	16.88	15.51	16.37	16.72	17.08	15.4	11.99	16.17	15.08	16.73	15.04	12.61	15.48	11.75	16.38	15.84	15.75	18.35	15.51	15.07	12.38	14.48	13.61	16.55	15.08	15.22	15.73	11.49	15	16.89	18.07	15.5	14.71	16.03	12.78	12.63	13.82	16.95
0.608565	-0.716516	0.172552	0.701834	1.11168	236.106	369.3	16.67	19	17.26	12.07	15.13	13.22	18.84	18.78	14.7	17.35	16.46	17.19	18.39	16.08	12.73	16.94	17.14	18.86	14.77	17.21	16.65	16.09	16.55	15.3	16.66	15.97	17.48	19.98	15.85	16.29	16.88	13.76	16.64	16.04	16.69	16.96	16.43	17.15	18.92	16.15	17.16	17.09	19.81
1.58958	0.668645	0.0999112	0.61062	1.11061	1163.75	422.8	19.16	18.28	19.01	17.82	17.82	18.98	16.1	18.39	18.82	18.49	19.06	18.11	18.04	14.76	19.23	15.59	18.99	14.72	18.46	15.26	17.87	15.25	19	19.24	19.65	19.05	17.26	18.54	18.37	18.54	14.81	15.15	16.32	18.22	15.09	20.24	18.47	19.91	16.17	18.6	17.24	18.94	15.46
1.30342	0.382301	0.100162	0.61062	1.10943	825.962	431.3	18.18	17.72	19.41	18.24	17.5	19.09	17.86	17.85	18.4	18.12	18.16	18.97	14.93	17.57	17.87	17.93	18.22	18.59	16.89	18.84	17.03	17.31	18.59	18.22	17.73	17.68	16.33	16.28	15.5	17.83	17.4	17.61	17.6	17.98	16.83	18.43	18.38	17.98	18.52	17.43	15.41	17.32	18.37
0.617061	-0.696516	0.784475	0.960974	1.10861	211.144	141	15.26	19.09	18.43	13.58	15.84	17.04	19.32	18.95	17.8	13.33	16.73	16.89	15.27	16.09	14.15	18.46	16.53	15.32	18.91	14.64	14.04	14.67	19.23	19.34	14.08	17.41	17.39	18.04	17.09	17.6	18.21	18.03	17.19	16.31	16.89	17.32	17.78	17.82	19.33	17.62	16.05	16.15	18.7
0.542542	-0.882194	0.028194	0.448193	1.10676	632.24	341.5	14.43	18.27	17.28	12.74	18.74	12.92	18.54	12.69	17.05	18.71	17.37	18.18	15.42	13.32	18.27	16.67	16.65	17.18	18.63	17.14	17.54	17.17	15.79	17.2	15.31	19.62	19.27	18.88	16.64	18.48	16.57	17.92	12.84	19.85	18	14.37	12.92	13.64	18.41	19.5	19.31	18.55	14.1
3.30262	1.72361	0.148176	0.68299	1.10548	270.243	344	14.57	16.49	14.36	14.05	12.76	15.64	15.21	16.97	13.65	12.25	5.85	11.12	12.9	13.36	5.85	6.38	14.07	12.49	16.32	16.12	15.97	5.85	14.89	5.85	15.13	5.85	14.18	12.54	13.12	5.11	14.41	6.38	6.67	16.36	16.39	5.85	16.54	12.71	5.85	14.24	6.38	12.16	15.07
0.564512	-0.824925	0.108524	0.612756	1.10265	583.256	330.6	19.82	22.03	17.04	21.1	17.09	20.4	21.5	17	21.89	22.08	17.08	17.12	18.07	21.16	20.13	20.09	17.14	20.17	20.82	18.88	21.93	21.01	20.78	22.63	20.78	22.93	22.79	22.79	17.31	20.15	20.68	19.88	16.96	22.05	21.9	20.51	21.21	19.96	21.56	22.88	21.17	21.75	17.27
1.30344	0.382323	0.892115	0.983052	1.10231	853.656	519.3	16.34	16.11	16.62	15.44	15.34	15.69	16.42	14.61	15.68	16.12	14.74	16.76	16.06	15.69	17.21	16.6	14.13	15.32	15.48	16.37	15.81	15.48	13.72	14.84	16.53	16.16	12.69	15.26	14.87	15.72	16.03	16.45	14.03	14.43	16.9	16.39	15.6	14.76	15.69	16.54	15.23	16.42	16.12
0.580192	-0.785398	0.669006	0.929717	1.10147	445.17	323.4	12.39	16.21	17.1	13.78	17.12	15.97	16.13	15.52	15.36	10.17	15.53	11.16	16.15	11.23	14.02	17.28	17.19	15.22	17.24	15.94	16.37	12.04	15.22	15.59	14.18	11.45	15.5	14.93	14.71	15.57	16.55	16.04	14.97	11.04	16.12	16.36	15.26	16.38	15.08	16.85	16.63	14.77	17.45
0.711845	-0.490366	0.0319179	0.458999	1.10007	566.58	48.3	18.14	17.11	16.76	19.16	17.74	16.48	17.64	16.81	17.62	18.6	16.8	14.71	14.91	17.33	17.87	18.79	16.51	16.67	16.78	16.19	17.79	19.8	15.95	20.01	17.37	17.05	15.49	17.65	19.54	17.96	17.75	16.65	16.79	19.83	18.36	18.27	17.77	17.36	18.63	18.74	17.06	16.85	16.97
0.776243	-0.365419	0.316639	0.793289	1.09982	354.284	560.3	17.02	14.04	14.57	16.53	14.22	16.73	17	16.19	17.06	17.24	17.04	16.29	16.55	16.8	16.8	17.01	17.47	16.05	16.01	15.02	16.6	15.82	16.87	16.89	16.28	16.83	15.64	16.75	17.26	16.72	14.5	17.71	16.98	16.45	17.12	17.29	16.58	16.9	17.83	17.75	16.42	16.4	17.47
0.671622	-0.57428	0.222716	0.743767	1.09977	222.031	53.3	15.05	15.92	16.71	12.89	14.48	12.12	12.28	15.33	11.9	13.82	12.92	15.27	15.73	17.37	14.77	16.37	15.51	14.68	16.34	17.21	15.12	15.09	14.78	15.47	15.31	13.97	14.74	12.67	15.08	15.37	15.45	13.63	11.83	12.06	16.84	15.81	14.61	15.03	15.81	15.46	15.2	15.49	15.42
0.682603	-0.550882	0.167345	0.694957	1.09897	777.8	42.3	17.56	17.96	18.83	17.83	17.7	15.08	18.17	19.13	15.01	17.77	15.34	19.17	15.37	17.28	15.24	19.22	19.17	16.57	16.08	17.79	19.06	20.06	18.02	15.23	17.43	18.13	18.87	18.43	18.93	18.78	17.42	18.41	18.27	16.49	18.43	18.68	17.73	18.19	15.53	17.39	17.85	16.36	17.33
0.735927	-0.442366	0.379752	0.817691	1.09876	764.562	591.6	14.46	13.78	16.54	13.95	16.67	16.5	17.28	15.66	17.53	16.77	17.17	17.12	14.53	17.5	17.04	16.88	17	17.61	15.72	14.81	14.32	16.5	17.32	17.1	17.52	16.87	17.54	17.14	15.96	16.29	17.44	15.47	16.29	16.7	17.03	17.33	17.29	17.09	17.44	16.71	16.87	16.94	14.99
0.497376	-1.00759	0.356856	0.811688	1.09799	873.323	519.7	14.56	14.47	15.11	8.84	8.52	16.12	14.64	12.95	8.42	8.17	13.47	15.73	14.26	16.22	14.34	15.45	9.35	11.51	10.17	9.82	15.37	15.03	14.13	14.81	14.28	14.25	15.77	13.91	13.09	13.66	14.23	15.61	16.01	8.92	15.05	16.71	16.2	13.55	16.12	14.51	13.25	13.58	15.53
1.51294	0.597355	0.209053	0.725971	1.09714	855.581	438.4	16.61	17.15	18.61	16.47	16.95	19.61	19.09	17.15	20.17	17.98	15.38	18.3	17.36	18.61	20.53	18.08	16.83	19.57	16.53	18.42	17.54	16.76	18.47	20.53	18.47	17.3	17.84	16.72	17.22	14.67	18.08	19.23	17.13	19.8	15.45	15.69	19.12	15.92	15.57	15.35	17.97	18.03	15.78
0.751334	-0.412473	0.0672499	0.574409	1.09558	678.591	519.3	16.52	16.65	14.77	13.08	15.4	13.28	15.99	13.1	16.1	14.48	16.04	15.47	16.19	16.37	15.66	16.79	13.95	15.08	15.84	16.02	16.63	16.1	15.93	16.74	16.09	15.15	14.41	16.04	13.6	15.37	15.4	16.68	15.28	14.94	16.32	15.94	15.23	15.42	15.79	16.52	16.67	16.21	16.11
0.762516	-0.391161	0.0768992	0.58911	1.09552	702.366	393.8	19.72	18.6	18.04	18.87	18.4	18.86	16.93	17.2	16.98	17.75	18.52	18.39	16.95	19.31	18.84	19.92	17.86	17.94	19.05	17.95	18.31	21.2	16.51	18.44	18.09	17.93	18.06	18.68	18.14	18.38	19.41	18.41	18.81	20.21	17.65	19.04	18.58	19.06	20.67	19.54	19.17	17.95	18.39
1.311	0.390667	0.167127	0.694957	1.09471	293.113	56.5	18.43	18.67	17.67	18.14	18.74	17.55	18.72	17.88	16.97	17.33	18.7	18.36	18.91	19.14	18.7	17.16	17.76	18.4	18.47	18.63	18.52	15.92	18.57	17.81	17.69	18.14	19	18.41	18.7	15.24	18.73	18.14	18.03	15.34	17.77	16.96	15.42	18.44	18.16	17.36	18.55	18.38	18.36
0.736322	-0.441591	0.138532	0.666219	1.09345	428.305	493.2	14.98	13.93	14.9	13.62	14.23	13.49	13.96	13.69	15.62	11.23	14.12	14.28	14.24	14.1	14.67	14.28	12.79	13.04	13.75	15.16	14.54	14.95	13.28	14.25	16.77	14.21	12.9	13.68	13.79	13.73	14.92	16.35	13.71	14.4	15.18	14.54	13.85	15.5	15.43	17	14.23	13.64	16.54
0.56052	-0.835161	0.451174	0.848631	1.09337	203.56	361.3	10.09	12.91	14.35	9.76	14.08	12.65	15.02	13.88	15.15	8.73	12.69	14.26	14.44	14.42	10.32	10.92	14.49	16.75	14.71	14.48	14.65	10.94	14.92	15.87	13.66	14.14	13.61	13.41	14.39	9.28	14.24	11.27	13.02	15.39	14.15	15.99	14.34	14.22	10.8	16.34	9.59	11.69	15.64
1.3313	0.412839	0.223265	0.743973	1.09286	748.005	54.1	16.14	16.06	16.81	16.85	16.84	16.13	17.34	17.5	16.17	17.38	16.86	16.6	16.84	17.27	14.33	16.03	16.86	17.68	15.21	17.44	15.96	17.86	15.13	16.47	16.34	17.21	16.36	16.87	15.98	16.79	17.21	14.83	16.53	13.68	14.48	15.08	17.87	16.87	14.82	14.55	16.61	16.48	14.94
0.751245	-0.412645	0.101131	0.61062	1.09048	662.335	406	17.63	16.12	17.23	16.55	16.12	16.32	15.39	16.01	18.93	15.54	16.84	16.04	16.76	15.09	16.6	17.11	16.62	15.84	16.71	15.21	17.84	17.9	15.42	16.51	15.56	17.53	15.12	16.58	16.23	18.73	17.94	17.88	16.25	18.73	17.5	18.55	16.17	16.13	17.96	17.69	16.85	16.27	16.76
0.736838	-0.440581	0.318806	0.794027	1.09038	197.178	62.1	15.48	13.16	12.56	15.63	17.57	13.87	15.49	16.45	15.78	15.49	16.14	14.89	14.59	16.02	15.96	14.59	15.61	15.29	16.24	14.42	18.05	14.99	16.03	16.73	17.47	14.35	15.53	16.06	16.76	15.96	14.51	15.94	14.44	15.64	16.8	16.84	14.6	16.09	15.83	15.65	15.84	15.53	16.63
0.615792	-0.699484	0.443319	0.845857	1.08914	1056.64	423.4	17.99	16.95	18.47	14.07	16.96	18.57	18.48	18.85	18.33	13.69	14.66	14.43	18.82	18.23	14.49	15.22	17.97	19.3	18.48	18.83	17.95	17.15	18.14	17.54	17.59	17.67	15.79	18.57	14.54	16.79	18.46	14.91	18.45	18.53	14.64	19.2	18.84	18.98	15.78	19.2	14.19	18.05	18.7
1.57064	0.651355	0.400142	0.823262	1.08902	415.303	348.2	23.62	22.82	22.19	20.79	21.81	23.28	23.33	22.88	22.47	19.82	24.47	24.34	21.99	23.11	24.96	23	21.8	22.41	22.7	21.02	23.56	23.37	20.62	22	19.69	23.45	23.04	23.11	18.19	23.51	22.43	24.25	22.6	24.73	22.93	20.86	21.5	16.7	23.18	21.57	22.37	22.01	23.37
1.51768	0.601871	0.254962	0.78046	1.08764	356.937	48.3	16.91	15.5	18.5	16.18	17.1	18.26	16.39	16.01	17.21	16.08	14.49	18.4	17.29	16.33	14.32	15.07	14.59	15.44	16.16	17.71	16.17	14.81	16.05	16.92	15.86	15.16	18.77	14.75	16.64	15.7	17.18	14.8	13.91	13.64	18.91	18.4	13.76	13.51	14.8	18.17	16.33	17.99	15.97
1.78994	0.839914	0.162819	0.694957	1.08761	979.944	303.6	18.16	17.96	16.94	12.69	17.17	17.1	17.5	18.19	15.67	18.03	16.45	13.2	19.1	18.16	18.34	18.13	18.19	18.17	13	18.96	13.38	17.78	17.6	16.36	13.36	17.35	15.27	17.74	18.52	13.49	13.34	18.07	16.61	17.71	13.43	14.34	16.84	18.43	14.13	18.62	12.73	18.11	14.07
1.35226	0.435376	0.230097	0.751123	1.08744	503.405	579.3	15.76	15.42	16.85	13.28	16.7	15.58	13.51	15.67	15.86	16.79	15.83	15.82	16.68	16.68	15.92	15.68	15.97	15.75	13.57	16.34	13.83	15.64	14.69	14.87	16.44	13.79	15.68	12.72	15.92	15.42	16.17	17.3	15.79	15.68	13.98	14.77	15.88	15.19	14.53	14.15	16.34	15.54	14.57
0.772722	-0.371978	0.304071	0.792819	1.08738	402.237	365.7	15.84	15.46	15.27	16.72	16.05	16.67	16.81	15.98	16.02	15.33	16.83	13.78	17.67	16.15	14.95	16.5	16.05	16.05	14.98	16.09	15.41	15.45	17.09	15.33	15.45	15.1	16.94	16.13	15.72	17.31	16.7	17.28	18.15	15.66	15.07	16.6	16.07	15.99	15.97	17.21	16.22	16.2	16.69
1.49947	0.584452	0.269981	0.786816	1.08736	278.09	385.2	16.84	15.55	16.87	15.01	14.21	15.24	12.62	14.38	17.72	15.34	18.46	15.23	13	12.87	16.13	16.59	15.22	15.05	15.04	13.63	16	18.25	14.3	15.91	13	14.82	14.76	14.14	14.54	12.09	12.96	13.96	14.86	14.57	15.63	13.98	14.39	14.31	13.79	13.38	16.4	15.16	13.64
1.48536	0.570817	0.247708	0.773835	1.08733	306.739	48.1	17.04	16.3	18.33	17.52	19.67	17.4	18.89	16.76	17.43	16.18	14.57	17.48	18.01	16.79	14.36	15.14	16.9	16.57	17.74	17.59	16.77	16.86	16.54	16.26	16.52	17.19	16.47	13.51	17.57	16.26	16.5	16.49	16.94	18.56	14.55	18.67	13.86	18.57	17.13	18.52	16.05	13.59	16.23
1.25705	0.330043	0.224875	0.746945	1.08726	440.389	467.5	13.41	15.19	14.92	15.15	15.13	15.66	15.93	15.84	15.31	14.2	15.97	15.71	15.43	16.11	16.31	17.04	15.4	14.11	15.26	13.92	13.3	14.78	14.3	14.61	14.64	14.04	15.87	14.79	15.56	13.92	15.6	15.15	15.07	14.74	16.6	15.28	14.76	14.82	15.28	16.3	15.17	15.14	13.97
1.47944	0.565054	0.091248	0.603504	1.08466	1072.6	423.8	15.02	16.52	16.26	18.64	17.49	18.81	17.15	18	19.09	16.44	19.07	18.33	17.92	17.76	16.7	18.42	15.22	14.81	18.28	15.33	14.96	15.3	18.38	18.81	17.55	18.12	18.31	17.54	17.83	18.3	15.85	18.49	18.19	18.47	15.16	16.88	17.47	14.41	17.36	17.33	14.84	17.74	15.51
0.758152	-0.399441	0.103918	0.610923	1.08328	458.694	47.6	19.09	17.86	18.95	18.19	18.11	17.77	19.26	17.52	18.44	17.9	18.16	16.88	15.34	16.52	18.92	16.72	18.26	17.71	19.86	18.79	18.54	20.74	17.73	18.27	18.1	17.12	18.03	17.54	18.8	18.85	18.49	16.62	17.76	18.66	17.83	18.25	17.68	17.54	18.94	19.82	19.81	19.19	19.07
1.36686	0.45086	0.0768095	0.58911	1.0828	667.918	434	15.93	18.98	18.59	18.25	18.73	18.15	15.52	18.54	18.7	19.2	19.01	19.18	19.37	19.11	17.64	18.17	18.21	16.63	18.53	16.06	18.65	18.34	19.15	18.36	15.75	18.61	18.9	17.8	18.08	17.86	15.69	18.47	18.93	17.41	18.22	18.5	18.47	17.73	16.07	18.55	18.73	18.93	16.24
1.61752	0.693785	0.153301	0.69042	1.08172	397.985	40.2	15.65	18.11	15.35	16.16	12.46	16.41	12.88	18.31	15.22	14.59	16.37	17.42	13.29	16.87	16.82	14.16	15.86	16.71	12.88	13.91	17.97	14.01	15.22	13.39	15.37	15.59	14.89	14.52	13.07	17.77	13.25	16.06	12.66	17.92	18.54	15.7	17.03	15.09	14.06	16.04	13.82	13.48	13.95
0.745967	-0.422817	0.313304	0.792819	1.07815	100.51	554.8	19.91	16.48	19.45	16.7	19.01	18.98	19.36	19.15	18.97	19.06	16.77	16.77	17.98	19.38	20.02	19.6	19.51	17.52	19.16	19.65	19.6	19.26	19.07	19.26	19.52	16.55	16.53	18.49	19.8	19.37	19.01	19.15	18.9	16.42	19.53	19.01	19.51	19.46	19.28	19.53	19.5	18.77	18.84
0.656076	-0.608065	0.802754	0.967812	1.07779	1087.67	395.5	19.54	21.08	20.73	19.99	19.29	22.04	20.59	21.94	21.85	19.57	19.94	19.71	21.73	21.73	20.17	21.21	22.47	23.35	21.41	23.51	20.44	20.12	22.19	20.57	21.3	20.86	20.72	20.82	19.06	22.41	23.48	22.82	21.38	20.77	14.88	19.93	22.17	23.66	20.61	21.09	19.43	22.19	22.41
1.39589	0.481183	0.1949	0.711679	1.07776	493.406	567	18.58	17.86	18.31	18.42	19.63	18.34	19.49	18.63	18.72	19.03	19.31	19.31	17.87	16.02	19.73	18.79	19.48	18.51	19.33	16.3	19.53	18.77	18.32	17.9	19.31	15.9	19.13	19.51	19.1	18.54	15.98	16.02	19.28	19.22	19.06	16.41	18.17	18.87	18.39	17.05	19.01	18.94	16.46
0.621353	-0.686516	0.207278	0.7231	1.07752	380.207	433.5	16.93	14.88	17.06	16.29	17.03	11.81	14.38	16.7	16.66	16.59	12.68	16.46	17.44	16.5	13.31	16.09	16.72	18.04	16.26	16.98	12.37	17.56	16.84	18.4	16.6	17.57	16.94	16.3	17	18.16	16.19	18.4	17.39	16.44	13.58	15.87	17.38	16.26	13.18	16.47	16.46	16.47	13.07
1.83317	0.874344	0.271457	0.786816	1.07677	680.274	313.2	15.1	14.51	17.04	16	12.37	18.54	15.77	15.63	16.44	15.56	19.38	17.26	17.31	16.23	13.23	14.1	17.07	12.77	12.79	17.66	14.02	17.42	12.06	16.94	16.45	17.26	16.81	17.21	18.93	12.37	13.18	16.99	15.32	19.09	13.28	14.18	12.65	12.23	16.39	13.61	12.59	16.58	19
2.02602	1.01865	0.278408	0.789317	1.0742	195.101	393.2	16.71	16.28	16.57	17.45	16.97	16.49	16.26	13.87	17.3	16.32	17.01	16.39	13.6	16.66	17.19	18.19	16.68	9.08	16.12	10.35	16.76	17.07	14.95	16.96	15.51	15.63	16.23	17.42	17.67	16.62	15.04	17	16.78	16.21	15.44	16.87	15.78	8.42	17.96	18.79	16.19	18.13	16.39
2.29716	1.19985	0.670172	0.92988	1.07419	490.304	375.8	17.7	13.75	16.81	17.17	15.79	16.78	16.93	10.54	10.69	16.33	16.06	17.32	17.77	16.83	16.76	17.66	16.16	10.96	17.55	17.29	17.75	16.77	10.28	11.6	17.61	16.23	16.78	9.59	11.13	10.61	16.12	16.07	11.58	11.13	17	16.41	10.8	10.28	18.49	16.07	18.57	10.05	17.48
2.515	1.33056	0.376691	0.817691	1.07394	794.646	47.3	17.21	15.12	17.68	18.41	20.09	17.98	18.45	11.04	18.77	14.86	18.6	11.66	15.92	11.68	19.69	12.68	12.02	11.34	17.72	17.77	18.35	19.1	17.09	19.08	11.77	16.95	16.94	11.13	11.55	17.69	20.03	19.71	11.1	11.41	18.19	19.06	18.67	10.69	12.51	19.11	15.42	10.43	12.41
3.6863	1.88217	0.231844	0.752396	1.0733	971.801	41.2	17	15.95	19.34	18.07	19.64	17.51	18.2	16.95	18.36	18.32	19.35	17.61	8.31	7.93	7.87	10.66	8.31	7.52	8.11	9.15	17.57	19.82	7.52	19.18	9.21	8.47	15.65	18.75	16.98	18.27	8.52	17.67	16.95	17.89	20.11	18.85	18.29	17.32	15.65	17.46	7.67	6.67	17.51
0.689537	-0.536301	0.191723	0.707381	1.07278	169.158	372.8	17.34	16.97	16.67	16.51	16.67	16.87	17.61	16.1	16.26	11.66	13.06	17.03	17.49	16.53	15.25	18.01	16.66	17.1	16.67	17.09	17.64	17.28	15.76	17.79	16.46	16.64	13.31	15.38	14.75	17.35	16.28	16.46	17.32	16.84	16.75	17.49	17.87	17.18	13.58	16.23	17.54	17.65	17.06
0.730408	-0.453226	0.378414	0.817691	1.07167	806.963	396.7	19.5	19.55	19.87	18.84	18.71	18.94	15.8	19.92	20.67	19.43	18.95	18.66	20.57	17.96	18.23	18.55	20.09	21.59	20.61	22.2	17.86	18.81	20.25	18.79	19.53	19.55	18.62	18.53	17.29	19.71	20.53	20.05	19.97	18.81	18.11	19.53	19.2	20.2	20.1	18.99	19.25	19.78	17.63
1.34453	0.427097	0.108291	0.612575	1.07137	430.289	581.3	16.62	18.58	18.9	17.89	18.71	17.79	16.27	18.7	18.36	19.73	17.99	19.7	18.32	16.44	19.45	18.34	18.87	17.7	17.77	16.7	16.66	17.61	18.69	18.99	16.45	16.32	17.41	18.86	18.75	18.7	16.4	16.4	18.62	18.2	16.77	19.53	18.72	19	16.68	16.53	18.7	18.87	16.78
1.30183	0.380538	0.0895622	0.603355	1.07078	502.757	45.2	19.88	18.26	18.58	18.91	21.42	20.71	17.27	19.09	19.04	18.65	18.94	18.38	18.98	20.64	18.75	16.91	19.99	18.98	19.06	19.57	18.04	18.52	19.17	18.93	18.47	18.6	18.49	19.68	20.55	18.34	18.99	18.17	18.05	18.55	18.44	20.5	19.99	19.94	17.96	18.15	18.21	19.43	18.93
1.62296	0.698624	0.0397593	0.493695	1.0705	236.938	229.5	16.06	19.63	21.34	19.36	19.74	20.13	15.67	19.77	18.9	21.75	19.32	20.16	19.54	19.64	16.05	20.3	16.12	19.96	18.8	16.17	19.73	19.5	19.31	19.86	18.73	15.77	18.96	15.57	16.13	18.51	19.93	18.03	19.11	18.96	19.85	18.82	16.71	19.88	19.55	19.13	15.92	15.59	20.39
1.45584	0.541849	0.216249	0.735958	1.07	274.95	37.6	15.79	15.77	17.8	15.68	13.56	16.52	14.82	13.95	14.22	17.08	15.14	12.24	15.38	17.1	15.46	13.5	15.16	15.39	12.06	16.77	15.3	13.28	14.83	15.38	15.24	15.69	14.91	14.37	12.32	16.46	16.24	15.01	16.83	14.4	15.91	15.63	15.44	15.14	15.98	15.12	12.77	15.11	13.17
4.15788	2.05585	0.102789	0.610923	1.06951	525.276	389.9	17.53	5.85	15.97	16.39	18.38	17.23	17.78	18.2	16.89	5.85	16.76	5.11	17.91	17.26	15.36	16.68	18.08	18.14	17.09	7.52	17.41	15.83	17.23	7.37	7.93	18.06	6.93	17.57	8.05	6.38	19.27	7.67	16.45	5.85	16.74	7.16	6.93	17.63	17.44	17.28	16.81	17.5	7.37
0.702819	-0.508774	0.696258	0.935088	1.06869	291.609	388.3	13.84	14.28	14.63	15.05	12.4	15.83	15.77	15.47	15.33	13.86	14.96	15.25	15.62	15.13	12.3	16.16	17.07	16.69	15.51	15.92	14.05	15.79	15.38	14.77	14.57	15.67	15.33	14.91	12.07	15.88	17.65	13.3	15.22	15.11	12.29	13.38	16.68	17.01	15.86	13.94	14.95	14.41	16.39
1.52228	0.606237	0.450416	0.84825	1.06815	824.395	296.1	18.44	18.45	18.1	17.32	16.54	19.15	18.7	14.55	16.88	14.24	20.22	19.09	17.86	19.35	17.26	17.91	17.89	14.72	14.76	18.17	19.03	18.37	15.51	14.93	17.95	17.55	16.77	17.84	17.14	17.53	17.86	18.17	18.62	19.5	15.07	15.45	18.41	17.88	15.27	15.02	17.89	17.21	15.44
1.79374	0.842968	0.0461589	0.51933	1.06628	706.168	485.6	11.99	12.22	16.88	17.51	17.04	16.4	11.41	15.72	15.1	14.88	17.68	15.75	15.1	11.81	17.34	14.96	17.03	16.51	12.58	12.65	16.19	12.78	17.24	16.72	11.99	12.05	11.58	17.02	17.16	15.2	12.04	12.98	15.37	15.94	11.88	13.08	11.4	16.41	12.73	12.41	15.43	16.14	12.59
1.7707	0.824323	0.126082	0.645366	1.0654	182.103	53.3	15.09	16.78	12.99	17.73	14.93	16.72	12.83	17.61	17.15	17.65	15.96	16.68	17.92	15.78	16.19	17.26	16.52	13.91	18.27	17.93	13.21	15.72	16.93	16.86	17.01	17.3	13.97	11.85	17.58	17.78	13.21	14.12	12.62	12.47	13.3	14.21	12.7	12.29	17.39	16.79	18.26	17.64	17.91
1.4104	0.496108	0.261255	0.783832	1.06533	158.096	548.5	18.03	15	16.4	17.94	18.14	17.92	15.07	17.7	17.78	17.78	17.85	17.1	17.9	17.85	18.08	17.75	15.62	17.61	17.96	15.73	15.47	15.69	17.74	18.02	17.81	15.25	15.17	14.95	18.12	17.38	15.33	17.52	15.27	17.54	18.35	18.33	15.11	14.95	18.15	18.02	18.13	14.99	18.3
1.5263	0.610043	0.434662	0.842164	1.06529	375.31	425.8	16.2	16.07	14.25	17.95	16.77	18.14	16.57	16.93	17.73	19.07	17.28	15.89	16.48	18.47	16.92	16.89	18.48	13.05	15.7	18.19	17.07	16.13	16.22	13.49	15.85	16.27	15.69	16.92	17.85	16.92	14.55	19.07	17.65	15.99	17.05	17.07	15.12	12.42	16.17	16.25	17.22	19.04	17.41
0.74235	-0.429828	0.399861	0.823262	1.06522	934.635	423.8	18.41	19.02	19.95	19.19	18.22	20.36	18.81	19.94	16.93	18.81	17.06	17.09	20.24	18.42	17.23	18.91	19.47	18.92	18.38	20.33	17.2	18.12	19.7	17.1	19.94	16.85	19.27	18.25	18.84	20.07	19.44	20.07	19.54	19.59	17.29	20.04	19.32	18.85	20.58	19.99	18.43	18.67	20.02
0.680236	-0.555892	0.701069	0.935884	1.06457	1090.64	396.3	17.12	17.08	18.8	18.74	15.54	19.12	17.71	18.38	19.15	18.08	15.73	17.05	18.17	18.18	15.71	17.46	20.48	20.06	19.15	20.59	18.26	15.85	19.56	17.51	18.22	18.71	17.03	16.33	15.8	18.87	19.63	18.38	19.19	18.79	15.88	16.01	18.71	20.04	17.18	18.16	15.54	18.98	17.87
0.71885	-0.476237	0.397748	0.823262	1.06388	924.765	41.6	16.66	15.68	16.93	16.48	16.85	16.86	13.49	15.82	18.45	17.46	16.87	17.51	16.36	17.61	16.22	18.23	18.46	17.56	18.22	17.74	17.16	18.16	18.4	17.44	17.69	16.87	17.16	17.36	17.84	16.05	16.15	16.59	17.54	17.84	17.29	18.4	17.89	17.39	18.39	14.14	17.58	14.93	14.57
0.664987	-0.588602	0.0794344	0.591445	1.06346	136.075	297	17.23	15.23	17.96	20.22	17.89	18.89	18.58	14.24	17.69	20.05	16.93	17.68	17.68	15.61	18.17	18	14.89	19.84	17.4	16.72	17.77	18.27	17.72	17.38	18.14	19.19	17.75	18.09	17.84	18.87	19.15	17.88	19.8	18.2	19.66	18.12	17.2	20.2	19.76	14.81	19.78	17.98	18.03
0.625208	-0.677591	0.263118	0.786516	1.06343	611.238	397.6	14.86	19.89	18.56	18.51	14.47	18.12	17.01	14.44	17.81	14.07	18.37	18.69	17.45	14.65	18.32	17.23	15.03	18.89	18.47	19.38	14.77	18.8	18.88	18.51	18.88	18.26	18.81	18.42	17.47	15.32	14.68	18.3	17.12	14.22	14.98	18.89	17.98	18.74	19.18	18.86	18.64	17.73	17.58
1.35966	0.443247	0.400231	0.823262	1.06208	824.722	44.3	19.18	18.01	19	19.11	19.03	15.75	17.05	20	19.54	19.64	20.65	19.2	18.98	17.83	19.34	19.03	18.49	18.79	15.72	17.74	16.96	19.27	19.35	18.62	18.73	17.83	18.3	18.88	16	18.06	18.59	18.39	18.33	19.15	18.92	20.22	17.76	18.55	18.66	18.22	19.84	18.69	19.29
1.49828	0.583312	0.286848	0.789603	1.06168	472.3	347	17.85	21.54	20.95	19.57	20.59	21.92	21.76	21.44	21.09	18.85	22.82	22.7	20.68	22.1	23.28	21.19	20.71	20.96	21.66	17.8	22.39	21.78	18.71	20.35	18.74	21.57	21.82	21.4	17.94	22.4	21.04	20.93	21.34	22.39	21.26	19.19	20.37	17.52	21.76	19.93	20.87	20.64	17.85
2.02828	1.02026	0.340554	0.805311	1.06124	164.92	57	16.7	17.8	17.61	12.42	18	16.67	11.72	17.51	11.53	17.55	16.99	17.64	12.25	18.75	15.78	18.57	17.24	11.8	16.07	12.88	16.43	17.26	16.4	15.64	16.93	12.32	11.78	13.3	17.64	11.38	12.24	13.18	17.27	17.75	16.76	18.85	14.68	11.08	12.97	16.07	11.58	10.96	12.88
2.09128	1.06439	0.237235	0.759004	1.06025	448.747	45.6	20.16	20.83	18.57	17.78	19.95	19.96	17.54	11.33	18.4	19.28	18.36	17.16	19.07	20.17	18.73	12.96	19.1	18.46	18.19	19.13	18.02	18.85	18.9	18.59	18.12	19.8	18.77	19.16	11.81	18.64	17.01	13.89	20.5	20.46	11.9	13.09	11.41	18.26	19.63	12.43	18.9	18.35	20.06
1.43815	0.524215	0.050535	0.538746	1.05869	666.915	399.5	16.99	18.65	18.55	18.3	16.71	18.41	14.87	18.26	18.11	19.19	17.36	18.25	18.76	15.2	16.4	15.9	18	17.92	18.08	15.6	15.31	15.56	18.8	18.8	15.19	16.68	18.24	17.75	15.4	17.56	18.19	15.41	18.57	16.03	17.74	18.53	17.02	18.33	15.59	15.38	17.88	17.89	15.79
1.44477	0.530839	0.472271	0.861216	1.0564	421.937	60.5	16.71	14.09	15.57	16.27	15.66	16.88	13.28	14.87	15.54	15.98	14.04	15.83	15.36	16.46	16.95	14.55	15.97	15.67	14.49	17.3	13.7	14.36	12.65	16.23	13.64	15.48	16.24	12.46	15.63	14.09	16.43	14.4	13.17	17	16.17	14.62	16.54	12.76	15.08	13.99	15.82	12.57	16.87
0.718947	-0.476043	0.426286	0.838076	1.05591	805.009	433.4	14.06	17.68	18.45	17.6	16.52	18.37	15.9	18.02	18.06	14.29	17.68	19.12	17.6	16.82	13.97	17.23	17.9	18.45	16.86	18.78	13.92	15.9	17.1	17.87	18.27	17.69	16.85	16.89	17.8	17.02	17.35	17.96	17.07	18.18	17.1	17.8	17.72	17.17	17.94	18.35	16.77	17.63	17.03
1.38377	0.468602	0.112867	0.617832	1.05445	489.389	572.2	16.29	13.06	16.02	15.15	15.81	16.41	13.35	15.85	15.43	14.86	16.83	13.64	15.17	16.63	16.3	16.43	14.01	13.45	14.9	14.33	14.99	15.76	15.62	15.97	13.69	13.72	13.43	12.57	16.03	14.43	13.73	14.44	15.61	12.99	13.87	14.67	15.89	15.49	16.28	14.88	17.32	15.17	14.46
1.61261	0.689398	0.381156	0.817691	1.05436	546.739	45.1	20.45	19.77	19.74	18.46	18.2	15.06	20.16	18.42	20.03	18.43	17.98	16.18	15.35	17.07	20.57	15.83	17.26	15.05	20.12	15.51	15.21	18.71	19.01	19.02	15.11	19.77	17.88	17.52	15.33	16.92	15.08	19.14	19.85	16.9	18.46	19.84	18.9	18.97	18.39	19.88	16.93	19.03	15.72
0.735609	-0.442989	0.255814	0.78046	1.05412	758.82	41	19.13	19.19	15.33	19.6	18.01	18.68	19.65	19.61	18.89	14.89	18.58	16.4	18.86	18.6	19.64	20.93	15.59	18.42	19.52	18.43	19.49	19.47	18.6	18.62	18.39	18.38	18.97	19.15	19.04	19.91	18.65	18.35	17.92	18.9	19.23	18.59	19.63	18.85	18.68	18.74	18.83	18.54	18.34
0.764644	-0.38714	0.133745	0.659287	1.05408	868.782	40.6	16.07	17.3	16.24	18.49	19.4	16.64	17.72	16.9	18.14	16.42	18.08	14.94	17.96	17.09	17.04	17.2	18.78	17.46	16.5	18.35	18.23	18.16	17.44	17.3	15.85	18.18	17.06	17.63	15.1	17.2	16.59	17.72	18.02	18.51	17.3	17.63	19.05	17.38	17.64	18.15	19.04	16.54	17.59
1.32347	0.404323	0.0627168	0.567262	1.05244	303.021	62.1	17.36	19.78	19.2	19.66	19.6	19.34	17.07	19.26	18.76	19.23	19.74	19.59	19.32	17.19	19.81	18.47	19.64	19.44	19.47	17.36	17.37	18.29	19.3	19.49	17.19	17.02	19.54	19.46	19.65	19.19	17.16	18.39	19.46	19.27	17.48	17.44	19.53	19.46	17.29	17.21	19.87	19.27	17.41
0.77474	-0.368215	0.410168	0.828214	1.05058	267.14	384.7	16.39	16.16	18.15	16.11	15.62	18.3	16.86	18.29	17.43	15.99	14.56	18.08	18.34	17.32	15.98	17.55	17.92	17.73	17.67	17.54	16.28	17.74	17.36	16.53	18.79	17.28	16.72	16.96	17	16.97	17.47	17.13	16.97	18.02	16.27	16.25	17.26	16.78	16.92	16.95	14.92	17.52	18.21
0.723128	-0.467677	0.165738	0.694957	1.05051	193.131	41	12.93	17.07	17.46	15.51	15.96	15.67	18.34	15.69	17.47	15.78	16.89	15.9	13.73	15.32	16.91	17.03	15.55	16.37	15.69	15.61	17.03	16.03	16.29	15.36	16.33	17.21	15.21	16.3	16.35	15.18	17.44	13.7	16.79	18.74	15.84	17.22	16.73	18.06	16.89	18.4	17.34	16.01	17.06
1.66354	0.734258	0.577071	0.899995	1.04761	185.117	295.4	19.75	19.1	19.24	18.24	18.63	18.48	19.75	18.44	18.87	18.51	19.39	18.64	19.54	14.75	17.25	19.53	18.47	18.98	17.8	19.48	14.88	20.86	14.28	19.49	19.53	14.63	19.55	14.26	18.4	15.47	19	18.21	19.11	19.4	19.58	19.57	14.5	14.31	16.66	18.87	14.74	17.39	19.78
0.600948	-0.734688	0.0156651	0.361839	1.04622	320.131	270.8	15.03	17.29	12.17	15.24	17.85	11.97	16.84	12.73	16.57	17.32	16.5	15.97	15.34	12.52	15.18	13.53	12.88	15.26	17.48	15.86	12.58	17.05	15.43	17.32	15.8	18.04	17.31	17.96	16.46	11.74	15.99	15.65	11.75	17.87	16.5	17.14	16.5	15.01	16.54	17.99	17.07	17.35	17.38
0.607387	-0.719312	0.501633	0.871629	1.04616	539.811	397	14.07	18.82	18.99	18.49	18.21	18.49	13.62	19.46	19.73	18.73	16.99	18.76	19.55	13.9	15.31	18.37	19.17	20.33	18.5	20.4	13.94	18.71	19.44	17.97	17.77	18.28	17.76	18.28	17.73	19.13	19.32	18.54	19.33	18.73	15.12	18.25	18.93	19.42	18.48	18.23	19.1	19.02	14.64
1.35023	0.433204	0.242711	0.766036	1.0452	243.006	67.4	16.82	16.68	17.22	16.8	16.51	16.38	17.23	17.35	15.04	17.01	16.55	17.12	17.24	14.13	16.91	15.04	17.24	16.71	16.57	17.23	14.21	16.53	16.25	17.13	16.8	16.92	16.85	16.87	16.82	13.44	16.71	14.77	16.59	13.58	17.06	15.04	16.93	16.77	17.15	14.49	13.89	16.41	16.71
1.44402	0.530086	0.118154	0.627616	1.0439	576.1	510.3	13.22	16.39	16.16	15.73	15.36	15.52	12.73	16.14	14.48	17.41	15.39	16.58	16.34	16.1	16.79	15.33	17.06	15.91	16.43	13.72	13.06	13.81	15	17.04	13.08	13.05	13.56	15.53	16.27	16.29	14.4	14	15.1	16.29	17.23	14.05	16.43	16.28	13.87	13.48	16.53	15.38	13.73
0.667082	-0.584065	0.415678	0.832721	1.04374	549.279	389	17.66	15.44	17.95	16.77	15.94	17.15	17.32	18.45	17.1	15.96	15.86	17.24	17.57	16.96	9.59	18.11	17.68	17.75	16.77	17.68	17.13	18.01	16.22	15.59	16.99	17.69	17.41	16.7	16.61	18.34	17.62	16.56	17.75	16.6	16.41	16.81	18.21	18.64	16.4	16.73	16.61	15.51	18.19
1.71826	0.780946	0.078217	0.591445	1.04309	382.314	398.2	15.65	19.3	19.18	20.14	19.35	20.27	15.23	19.71	18.15	19.7	20.08	20.3	20.08	15.5	18.3	19.81	19.56	18.69	19.48	15.86	15.64	21.89	19.98	20.48	15.53	15.41	19.88	18.38	19.06	20.3	15.46	15.62	17.82	20.64	15.82	15.97	16.33	18.32	15.88	15.67	19.26	20.6	16.05
0.757576	-0.400538	0.653885	0.924942	1.04196	528.344	410.6	18.27	19.57	19.41	15.23	15.25	19.99	18.59	19.72	19.8	18.72	18.37	19.84	19.22	19.2	18.47	18.72	19.23	19.44	17.89	19.82	19.21	18.64	19.9	19.26	19.3	19.3	18.45	18.85	18.28	19.58	20.24	19.67	18.95	19.01	16.61	19.29	19.01	19.14	19.66	19.6	18.27	19.12	18.56
0.679821	-0.556774	0.271975	0.786816	1.04117	298.637	394.4	16.38	15.77	13.23	17.53	16.37	18.01	17.17	12.7	17.37	16.8	17.71	16.83	17.14	17.89	13.45	16.76	13.67	18.8	16.83	16.98	16.5	16.75	17.11	16.58	17.17	17.09	16.72	16.52	15.97	17.73	18.44	16.92	17.87	16.3	16.29	16.37	17.87	17.92	18.34	17.45	14.01	17.53	17.91
2.11769	1.08249	0.269748	0.786816	1.0403	609.344	307.1	16.85	12.29	13.87	14.98	14.48	16.79	15.34	15.58	11.43	9.97	18.94	16.46	15.82	11.12	11.29	11.9	11.31	10.78	10.73	16.37	11.27	16.02	15.07	15.54	11.22	16.45	16.31	9.35	16.54	15.42	11.34	17.79	15.4	18.52	17.83	12.27	10.69	10.17	15.53	11.63	10.61	9.82	11.66
0.770812	-0.375548	0.298842	0.792819	1.03987	586.326	454.9	15.58	15.33	15.85	17.11	15.68	16.77	16.11	15.36	15.88	15.08	15.96	13.66	17.64	15.46	14.75	14.66	16.66	17.38	16.29	17.59	13.78	16.22	17.47	16.14	16	15.49	16.61	15.44	16.18	15.52	16.8	15.98	15.82	16.06	13.91	16.09	15.55	14.91	16.71	16.28	15.79	16.11	16.8
0.413438	-1.27426	0.13226	0.65912	1.03946	639.343	596.5	15.89	7.37	7.52	16.09	15.41	16.37	15.91	8.31	15.82	16.45	16.51	7.93	7.81	16.08	17.05	15.69	7.81	16.33	7.52	15.76	7.93	8.84	15.12	17.05	16.88	16.34	14.77	15.42	14.68	13.17	15.48	14.37	14.95	16.66	16.73	16.94	15.31	15.72	15.65	15.85	14.49	15.81	16.56
0.696821	-0.52114	0.49509	0.87101	1.03932	1488.01	417.5	21.67	21.76	18.72	23.59	21.22	23.51	21.66	23.14	23.11	21.46	21.12	20.01	22.95	22.82	19.13	22.52	18.83	23.51	22.1	22.95	20.99	21.93	23.33	22.23	23.14	21.68	22.22	21.94	21.66	23.35	23.14	23.54	23.21	21.46	20.2	21.79	22.73	23.33	22.39	22.47	21.8	23.51	23.16
0.718197	-0.477548	0.57379	0.899213	1.03921	616.227	383	15.54	15.34	16.5	15.26	13	15.96	15.27	16.43	16.44	14.82	14.01	15.68	16.69	16.76	13.69	16.28	16.46	17.04	17.13	16.45	15.19	16.94	16.62	15.94	15.79	13.64	16.92	12.43	14.71	16.77	16.23	16.93	15.76	12.93	15.51	14.6	16.32	15.49	16.22	15.77	16.86	17.67	14.38
1.41099	0.49671	0.10377	0.610923	1.03911	376.231	297.7	17.37	17.34	14.63	17.85	17.67	17.71	14.25	17.09	17.53	17.74	17.62	18.4	17.61	14.55	17.31	16.69	14.95	17.8	18.02	15.08	14.67	15.06	17.33	16.16	15.73	15.49	18.13	17.73	17.98	17.13	17.75	17.92	17.58	16.26	14.87	15.29	17.36	16.72	15.09	17.37	16.21	18.12	15.23
1.41971	0.505591	0.288211	0.789603	1.0373	152.002	36.3	14.98	11.45	16.8	13.11	13.36	16.88	14.04	16.17	13.23	16.77	15.17	13.71	15.52	13.64	14.07	13.07	15.68	14.28	13.1	15.44	14.65	12.92	12.27	14.12	14.27	14.72	15.06	12.82	13.47	14.26	14.03	15.08	13.95	13.91	14.67	14.89	15.62	12.6	12.88	14.51	14.71	11.83	12.77
1.6358	0.71	0.319343	0.794027	1.03689	872.777	42.4	14.23	19.51	18.03	18.45	18.41	18.99	18.4	18.24	18.54	18.53	18.19	18.06	17.4	15.06	19.21	19.44	18.28	15.71	17.98	14.67	14.1	19.91	18.11	19.33	17.38	18.1	18.44	18.02	19.06	17.08	14.1	18.09	18.77	18.26	17.68	18.02	13.62	13.37	14.71	18.88	18.86	18.73	14.82
1.35083	0.433849	0.278482	0.789317	1.03571	383.004	42.5	14.6	16.67	17.38	18.49	16.07	16.15	17.63	16.13	17.12	15.89	18.1	16.79	17.51	16.7	18.56	17.17	17.05	16.23	16.45	16.87	16.55	18.05	16.14	16.37	16.65	15.31	18.61	13.74	17.97	16.43	16.07	14.95	14.22	15.72	14.7	18.11	17.77	16.81	16.16	16.21	16.39	17.39	16.8
1.37729	0.461828	0.343347	0.805512	1.03524	404.9	39.5	17.88	16.05	16.47	15.7	18.56	18.98	15.94	15.95	13.24	17.48	15.79	15.9	15.69	17.57	15.8	15.88	16	15.33	15.01	16.45	16.29	19.15	15.55	15.38	14.88	15.85	15.69	15.31	16.08	16.24	16.92	16.34	15.73	15.16	16.41	17.36	17.44	15.27	16.38	15.25	14.44	17.86	17.08
1.41215	0.497892	0.46407	0.856686	1.03516	264.652	563.3	13.4	12.84	13.69	10.73	10.28	11.53	12.76	12.44	13.5	12.76	11.63	12.38	13.36	13.02	13.7	11.88	11.29	12.1	10.71	14.7	13.26	11.95	11.83	14.17	14.83	11.36	10.86	9.28	11.05	12.53	11.31	12.2	10.66	11.9	12.71	14.33	12.91	10.13	11.78	14.11	13.03	11.05	11.64
0.670521	-0.576645	0.477325	0.865491	1.03422	131.068	287.4	14.25	15.17	14.89	17.2	17.45	16.45	15.82	15.56	16.76	16.64	13.57	13.1	16.6	16.25	13.3	14.15	16.91	16.95	17.07	15.23	17.45	14.01	16.8	16.57	17.12	18.21	17.05	16.55	13.05	15.87	16.9	14.14	14.02	12.52	16.7	17.2	17.58	16.48	17.07	16.55	16.86	16.22	17.6
0.737926	-0.438452	0.309797	0.792819	1.03386	462.365	582.3	16.52	15.33	16.19	13.06	15.98	14.79	16.41	15.95	16.29	16.44	14.02	13.55	13.8	15.69	16.8	15.35	16.59	17.65	16.42	16.96	16.45	14.36	15.52	16.25	15.93	16.12	16.49	15.68	13.58	15.65	16.31	15.93	13.14	15.02	16.23	16.44	15.69	15.93	16.33	16.84	16.01	15.11	16.61
0.653938	-0.612774	0.920518	0.989316	1.03223	289.619	375	12.82	15.18	16.79	11.88	14.94	16.53	15.08	16.15	16.34	14.25	12.88	15.66	13.82	15.06	12.58	14.8	17.94	16.81	15.28	17.41	15.21	13.36	16.68	15.63	14.7	15.35	14.94	14.88	12.41	16.72	17.47	15.79	14.47	14.97	12.62	13.7	16.31	17.76	13.43	13.07	13.15	16.2	17.29
0.585439	-0.772409	0.402936	0.82494	1.03055	367.002	67.6	11.25	10.66	15.16	14.57	14.81	17.03	16.23	15.21	16.12	14.57	11.74	17.61	11.43	11.29	15.4	12.07	17.1	15.94	16.41	12.05	16.3	16.58	14.96	15.1	16.08	16.7	14.49	13.22	14.88	16.45	11.41	12.37	13.45	16.42	16.22	12.44	16.39	15.89	17.06	14.15	16.35	11.13	15.99
0.735346	-0.443505	0.369584	0.811688	1.02951	744.842	41.6	17.95	17.72	16.95	15.96	16.95	17.64	17.35	16.93	18.08	18.06	18.45	16.73	14.65	14.35	18.75	18.59	17.49	17.15	16.49	14.95	18.03	17.82	17.9	18.07	18.58	17.07	16.49	18.2	16.34	17.46	17.42	18.92	17.96	18.14	17.18	19.65	17.73	18.78	16.06	17.93	15.73	18.16	17.56
1.32053	0.401118	0.239938	0.762052	1.02934	160.133	335.5	16.49	19.27	18.08	19.36	19.01	18.99	18.73	17.54	17.72	18.77	18.76	19.54	18.71	18.79	18.11	19.56	18.97	18.26	18.53	18.52	16.51	19.17	19.18	16.44	19.43	18.83	18.83	18.48	19.34	18.51	19.06	18.38	19.01	18.52	19.14	16.7	19.06	17.67	17.41	18.85	16.36	17.43	16.69
1.59968	0.677785	0.0509575	0.539833	1.02888	806.66	45.5	18.49	19.88	18.94	18.73	18.22	19.22	19.92	18.51	19.23	13.54	19.48	19.93	18.88	19.79	16.86	15.99	19.4	18.04	20.11	17.81	15.37	14.84	18.06	20.38	18.4	17.5	18	19.07	14.42	17.64	17.78	19.21	19.68	13.7	14.49	17.76	19.11	18.35	19.14	19.2	19.75	18.82	20.4
0.669762	-0.57828	0.370304	0.811688	1.02773	105.033	111.5	16.95	12.51	17.78	15.9	12.43	16.62	15.87	17.33	17.55	17.29	17.19	13.06	16.9	13.16	16.96	14.12	17.04	16.75	16.28	16.99	14.76	15.98	16.07	16.81	17.56	17.65	17.69	17.17	16.7	17.22	15.41	17.26	16.11	16.2	13.31	14.21	16.34	16.75	17.33	17.43	16.11	16.7	17.62
0.646273	-0.629785	0.227264	0.750733	1.02744	437.284	408.8	14.38	11.69	17.48	14.75	14.05	16.71	17.18	17.66	11.69	17.81	16.15	14.67	16.34	15.33	13.71	15.64	14.5	16.5	15.56	16.01	15.94	18.07	16.14	16.05	17.85	17.29	15.61	15.07	17.03	16.28	17.51	16.35	16.41	16.46	15.19	15.35	15.44	16	13.21	16.61	16.07	11.22	17.83
0.73596	-0.442301	0.0404001	0.494698	1.02589	978.85	42.3	18.88	18.41	17.38	18.83	17.6	17.97	20.14	17.9	16.41	16.57	18.28	17.36	19.52	17.78	19.05	19.64	17.58	19.57	19.21	18.7	17.83	19.72	17.06	18.76	18.95	19.15	17.65	19.28	19.91	17	19.22	19.8	20.41	16.97	17.31	19.51	18.63	16.62	20.27	19.61	17.62	17.35	15.98
0.686286	-0.543118	0.0125735	0.327663	1.02561	287.139	310.4	16.42	16.56	16.89	18.3	17.97	12.67	17.58	12.37	16.54	16.61	16.96	18.63	18.38	16.93	14.14	14.11	15.59	15.49	16.48	16.6	16.27	16.51	15.89	16.3	16.76	18.03	18.02	18.43	18.17	17.5	16.73	18.67	15.63	18.65	17.46	16.78	16.68	16.46	17.24	17.7	17.74	17.79	18.55
1.45927	0.545247	0.540727	0.883174	1.02477	1252.71	42.1	17.94	19.97	18.49	18.44	18.68	17.41	18.08	18.6	18.6	17.2	19.08	14.99	18	14.83	18.98	19.35	17.42	14.79	17.29	15.32	17.27	19.49	15.59	14.98	16.84	17.6	16.89	18.64	18.8	18.1	18.31	18.45	18.75	18.01	18.86	16.81	18.84	14.4	18.15	18.48	18.24	16.79	17.08
0.755828	-0.403871	0.162019	0.694957	1.02463	768.733	47.3	18.05	16.61	14.74	17.79	18.22	17.53	17.72	17.11	15.88	17.22	17.16	15.83	14.99	17.33	18.82	18.39	19.11	16.13	16.28	17.17	17.53	16.39	17.42	18.93	17.3	17.99	18.22	17.16	16.35	17.65	17.49	17.74	16.99	18	18.24	18.71	18.27	17.18	16.73	17.58	16.55	18.39	15.36
1.38383	0.468667	0.116621	0.624164	1.02397	442.263	272.9	16.8	14.27	13.78	16.52	16.26	17.12	15.81	16.38	17.19	12.93	16.62	13.73	16.38	15.16	16.68	14.71	14.08	13.56	15.12	14.4	16.84	15.84	16.08	15.59	14.88	13.76	16.71	15.74	13.74	15.28	16.08	14.49	16.62	13.08	16.28	16.81	16.3	15.92	14.51	14.1	16.44	15.74	14.53
1.4946	0.579763	0.230248	0.751123	1.02314	593.31	579.5	15.88	14.33	16.61	11.38	14.33	16.04	13.53	14.91	14.86	16.03	15.37	15.1	14.53	15.16	15.63	13.14	15.9	14.9	11.64	16.84	13.56	15.76	11.25	15.22	15.02	13.11	11.71	14.73	14.21	14.15	14.96	13.17	15.55	11.66	15.89	16.11	15.95	15.25	15.59	15.66	14.98	13.88	14.22
1.3731	0.457441	0.545077	0.883174	1.02252	576.27	434.8	17.91	20.06	21.07	20.4	19.92	20.09	19.32	17.75	20.3	20.69	19.95	20.22	20.85	19.92	19.01	19.1	20.57	21.06	20.14	17.85	17.95	19.68	17.61	20.15	20.11	20.13	19.96	20.68	20.06	17.52	17.75	20.71	17.69	20.56	18	19.98	20.57	17.57	20.25	20.06	20.12	17.64	17.89
1.6922	0.758903	0.0376409	0.485023	1.02245	426.89	40.1	17.67	12.33	12.78	14.17	15.2	18.93	16.41	16.96	17.19	17.83	15.49	16.11	15.53	16.92	15.07	15.54	16.35	18.33	13.88	17.16	13.05	13.81	16.98	15.02	13.06	15.47	17.49	11.64	16.52	17.59	13.02	16.45	12.42	14.72	13.08	14.81	16.83	19.15	17	13.46	12.43	14.98	13.72
1.33695	0.418946	0.105713	0.612125	1.02183	508.31	314.8	17.39	17.17	14.84	17.19	17.23	17.26	16.29	16.95	17.05	14.28	18.03	16.89	17.87	14.76	17.56	15.59	15.16	17.22	18	16.14	17	15.25	16.95	17.65	14.83	14.66	16.88	17.41	15.07	17.05	16.97	16.49	17.38	17.65	15.1	15.46	16.96	16.75	15.28	15.04	17.42	17.49	15.46
1.65728	0.728817	0.219591	0.73737	1.019	327.194	299	15.85	16.06	16.03	15.54	16.71	15.52	15.27	15.45	15.78	14.8	14.62	14.85	12.44	13.84	14.69	12.27	16.32	12.56	14.83	16.55	16.03	12.3	10.43	15.89	11.55	11.64	14.68	16.83	16.79	10.86	11.55	14.54	13.74	11.23	16.84	15.56	17.39	14.47	16.1	14.15	14.64	16.61	16.42
0.771491	-0.37428	0.546201	0.884349	1.0188	1015.16	417.8	18.01	18.8	20.01	18.68	17.88	19.12	18.52	18.99	18.91	19.44	19.56	18.15	18.45	18.06	14.73	19.51	19.73	19.1	18.5	19.37	15.81	18.3	18.94	19.69	18.27	18.26	18.5	18.45	19.16	19.26	19.3	18.32	18.92	19.06	18.03	17.19	19.05	18.94	19.92	19.69	18.86	19.03	20.28
1.27995	0.356086	0.239082	0.761158	1.01812	414.321	337.7	17.23	17.09	17.24	17.92	18.45	17.78	17.65	18.3	17.89	16.96	18.59	18.51	17.87	17.09	18.41	17.75	17.15	17.52	17.99	16.92	17.65	16.93	15.05	16.58	17.13	17.37	17.99	17.01	18.28	19.07	17.73	18.7	18.66	17.63	14.71	16.46	16.81	16.27	17.8	16.88	17.86	18.31	19.56
1.41	0.495699	0.349598	0.807518	1.01772	327.252	410.1	17.94	17.51	17.75	17.39	18.08	17.22	16.9	18.3	16.46	17.33	16.64	18.38	18.2	17.15	17.65	18.22	14.26	15.66	17.83	19.28	18.07	17.84	18.3	16.86	16.09	16.31	16.48	17.09	17.98	18.73	13.05	18.93	16.16	16.79	18.15	17.06	16.29	18.2	17.13	18.57	17.28	16.31	16.12
1.60973	0.686817	0.462968	0.855676	1.01769	1259.5	304.6	18.72	19.9	18.14	18.48	19.78	18.43	19.85	19.24	14.07	18.07	18.63	17.04	21.21	19.96	19.3	18.36	18.21	19.69	18.86	20.98	19.91	19.28	18.55	15.4	17.36	18.77	19.34	19.14	18.66	13.6	16.27	18.24	14.07	19.28	14.58	17.58	19.83	20.71	17.93	19.29	17.84	18.61	15.02
0.731694	-0.450688	0.0727438	0.574409	1.01695	147.092	567.4	17.53	16.54	13.96	16.71	16.38	13.61	17.1	16.6	16.59	16.15	16.29	16.97	17.03	13.93	17.29	14.85	14.35	14.85	16.44	17.66	17.06	16.77	15.8	18.19	17.35	16.79	13.63	17.43	16.67	17.22	17.41	17.64	17.55	16.93	16.99	14.86	15.96	17.02	17.88	17.97	16.71	17.06	17.28
1.41787	0.50372	0.125885	0.645366	1.01591	1295.58	482.9	17.37	15.64	15.58	15.44	14.79	16.91	12.27	17	14.88	15.85	16.39	17.21	15.58	16.04	15.68	16	12.96	15.8	16.74	15.8	14.87	13.42	14.22	16.01	15.6	12.7	14.59	14.72	15.56	17.11	13.49	15.1	15.51	15.47	17.5	16.16	14.53	16.82	17.65	16.72	15.89	14.48	15.61
1.93334	0.951097	0.0722019	0.574409	1.01441	559.13	511.6	13	17.87	18.16	16.68	17.03	16.85	10.25	18.05	14.84	18.06	15.55	16.69	16.14	16.58	19.26	17.54	17.92	17.27	16.9	16.71	10.78	16.69	15.05	18.85	10.54	10.73	14.04	15.46	16.73	16.5	15.8	11.62	16.02	13.89	17.42	11.55	17.22	17.58	12.38	15.83	18.45	14.64	18.17
0.725006	-0.463935	0.0866803	0.597972	1.01429	884.835	41.6	18.52	17.39	15.73	18.53	15.63	15.65	18.86	15.5	18.54	15.32	18.45	17.53	15.91	19.13	19.83	18.3	15.93	18.22	17.01	19.03	18.06	18.4	17.65	19.45	18.32	18.19	17.77	18.17	17.99	16.57	18.58	18.29	17.71	18.36	18.8	19.63	17.92	17.21	18.15	18.32	15.66	16.46	18.21
1.49196	0.577204	0.129235	0.654546	1.01407	362.702	47.5	17.18	19.28	18.43	19.02	14.58	18	19.55	19.55	18.64	17.53	19.93	17.71	17.61	18.06	19.18	15.51	19.52	17.44	18.83	17.74	17.77	17.98	19.14	16.11	19.29	17.88	18.91	14.18	19.92	18.75	18.72	19.62	14.65	15.49	19.38	17.78	14.43	18.44	17.21	17.26	17.48	16.7	17.25
1.5307	0.614194	0.160979	0.694957	1.01362	131.022	358.6	16.79	17.37	17.13	16.83	16.88	17.76	16.95	17.27	15.21	16.06	13.55	17.45	17.23	16.87	13.25	14.13	15.41	15.04	12.85	16.83	16.84	13.97	16.81	13.37	15.28	16.21	17.56	13.18	17.46	18.4	16.67	16.73	16.79	18.24	15.55	14.22	17.39	17.14	14.02	17.68	16.89	16.39	16.47
1.33639	0.418344	0.351571	0.808303	1.01174	284.924	34.7	17.09	17.29	16.95	12.38	17.43	14.57	14.88	17.11	14.11	16.42	15.33	16.36	15.62	14.96	15.13	14.01	15.42	15.33	17.33	16.9	15.55	16.34	14.37	15.06	15.15	15.32	14.65	15.98	16.1	16.3	14.63	15.14	15.44	14.66	14.12	14.09	14.99	13.98	15.15	15.14	15.28	13.85	15.75
1.48884	0.574194	0.141868	0.675179	1.01087	585.118	483	16.74	16.09	16.03	16.45	14.55	15.51	14.79	15.67	15.51	16.74	13.22	16.19	16.79	15.1	16.42	12.99	17.07	15.75	15.33	15.84	16.71	12.8	15.57	16.54	15.85	12.09	11.62	14.94	15.67	14.95	15.75	15.39	14.99	11.57	16.2	15.73	14.83	14.55	16.18	15.92	16.59	15.69	17.34
2.342	1.22774	0.259915	0.783832	1.01065	1136.91	595.8	12.13	5.11	13.96	14.3	12.22	12.85	13.72	5.85	12.7	12.22	12.29	12.1	6.67	13.78	13.5	6.93	12.84	5.85	14.2	7.37	6.67	6.93	12.65	13.1	7.52	7.16	14.19	15.08	12.9	14.01	13.88	7.37	7.67	11.83	12.63	6.93	8.63	11.74	7.37	7.52	13.78	10.78	6.93
1.65363	0.725634	0.142152	0.675179	1.00985	505.383	517.1	12.46	14.71	16.51	16.6	16.51	16.34	16.07	15.43	16.59	16.17	15.69	16.34	15.83	12.29	12.33	17.03	17.22	16.23	16.73	13.04	12.33	13.12	11.43	16.23	12.46	16.45	16.75	16.31	16.72	11.58	12.44	13.33	16.43	13.32	12.3	13.43	12.74	16.18	16.52	16.34	11.74	15.97	13.05
0.691317	-0.532581	0.321441	0.794027	1.00901	180.021	53.5	13.8	15.7	16.17	14.16	13.35	14.95	13.25	14.6	9.76	14.32	10.54	14.4	15.17	14.85	14.98	15.76	14.54	13.72	14.85	15.08	14.13	14.32	13.82	14.58	15.04	14.19	14.6	13.05	15.63	15.42	14.71	11.29	16.03	11.1	15.14	15.15	14.05	13.2	15.82	14.84	14.6	15.66	15.53
1.64017	0.713849	0.210505	0.728905	1.00841	186.196	122.2	15.48	15.43	17.49	16.22	15.35	16.86	16.8	10.86	14.28	16.92	14.83	16.44	17.01	13.75	14.77	12.46	16.11	16.87	16.92	15.64	15.82	12.47	16.64	16.82	16.04	11.77	13.89	16.17	15.41	13.34	16.31	12.7	14.53	16.65	14.82	12.79	15.87	16.85	12.34	17.05	12.06	14.26	17.25
1.40851	0.494172	0.288264	0.789603	1.00823	771.851	41.8	16.31	18.23	16.97	19.45	18.9	18.93	20.7	18.36	19.71	18.21	18.86	18.11	15.37	19.62	19.76	19.34	16.59	18.33	16.84	15.53	18.55	18.38	18.11	17.66	15.13	19.59	18.34	18.61	18.49	18.16	19.03	19.11	18.68	18.03	19.28	18.21	18.5	18.3	17.54	20.4	18	17.93	15.74
1.49367	0.57886	0.540717	0.883174	1.00772	910.928	42.3	15.58	18.17	15.45	19.5	17.77	16.4	16.92	18.28	19.51	17.06	17.73	17.6	18.66	19.45	18.69	16.14	15.7	15.4	19.36	17.99	15.57	15.75	15.05	18.51	15.47	19.07	15.25	15.05	15.64	17.3	15.4	17.16	15.33	19.35	19.33	19.22	17.29	17.56	15.82	18.37	18.18	18.56	19.32
1.51981	0.603892	0.32177	0.794027	1.00757	422.215	348.4	16.49	15.96	13.39	12.9	12.88	18.21	15.99	14.52	16.05	15.18	17.55	17.04	16.21	16.16	16.98	14.42	15.94	16.62	14.3	15.17	16.17	16.41	12.41	13.66	13.5	17.4	13.17	12.31	13.43	16.82	16.14	17.12	15	12.83	16.03	14.49	13.07	12.58	16.29	16.26	15.06	15.88	16.45
0.787091	-0.345398	0.65945	0.927856	1.00742	639.263	395	17.2	18.02	16.38	16.26	17.44	17.97	16.86	16.4	17.82	18.03	18.32	16.43	17.49	18.18	14.64	17.91	18.43	18.44	17.63	18.19	16.97	17.81	17.12	18.37	17.22	17.61	17.9	17.1	15.77	17.48	17.43	19.05	17.9	15.62	17.52	15.26	17.29	18.63	17.42	17.27	17.01	17.71	18.45
0.74874	-0.417462	0.436163	0.84218	1.00719	281.632	404.7	15.62	16.39	17.91	15.72	14.22	16.36	16.38	17.71	17.33	18.34	16.54	17.08	17.33	17.69	18.86	17.63	17.78	18.78	16.79	18.37	17.74	16.32	18.59	16.77	16.12	17.48	17.05	16.45	14.38	16.46	18.27	18.06	16.57	16.93	16.06	16.72	18.34	16.67	16.57	18.78	16.61	17.25	19.1
1.50339	0.588215	0.141437	0.674869	1.00604	486.11	467	13.25	17.61	17.13	17.78	16.96	16.37	14.72	16.46	15.36	17.88	16.95	17.23	14.13	15.73	17.91	16.77	17.46	16.86	16.89	13.74	13.08	13.83	15.79	16.99	15.05	13.07	15.91	17.17	16.85	16.31	13.04	14.02	16.31	18.15	18.13	14.07	16.2	16.94	13.88	14.98	17.13	16.07	17.1
1.47583	0.561527	0.127438	0.649763	1.00572	336.171	396.1	16.64	17.58	17.83	16.03	16.24	17.86	16.77	17.26	17.83	18.13	18.87	18.34	18.18	17.8	16.8	16.58	12.45	18.47	17.53	18.63	16.64	16.82	17.47	18.27	17.31	16.98	17.04	17.32	15.93	18.17	18.59	17.04	17.16	12.44	16.13	18.42	17.69	18.75	18.13	16.79	15.75	18.1	17.28
0.740615	-0.433204	0.186547	0.705684	1.00409	544.742	40.3	19.49	20.66	18.41	20.12	20.3	16.19	18.66	19.75	19.78	19.31	21.01	19.55	15.48	17.99	19.06	21.94	20.03	17.77	19.94	20.11	20.76	20.4	19.13	19.4	19.67	18.6	19.23	19.11	19.34	18.31	19.33	20.91	20.31	18.4	19.81	18.92	19.57	19.42	19.15	18.9	19.66	18.21	18.6
1.36139	0.445075	0.216274	0.735958	1.00354	1259.65	305.4	18.73	19.22	19.07	15.16	19.18	18.02	19.14	19.04	17.18	16.74	18.25	19.83	20.19	19.64	18.52	18.83	19.1	19.11	15.19	19.96	19.31	15.59	18.66	17.36	18.65	20	18.5	18.18	17.74	17.14	17.76	16.75	16.16	18.36	18.1	17.32	18.83	18.77	18.49	18.2	17.98	18.1	17.56
1.63734	0.711355	0.360181	0.811688	1.00286	699.858	40.8	19.56	17.83	15.85	14.23	18.81	17.77	18.44	16.27	16.61	16.69	16.02	19.06	13.17	18.26	18.41	17.22	15.11	12.67	15.88	13.8	17.25	18.26	16.13	17.29	18.67	18.29	17.14	18.94	18.46	17.17	17.31	18.3	15.48	12.4	17.79	16.45	15.1	16.96	13.94	18.09	13.6	16.79	13.83
1.53621	0.619376	0.175254	0.703149	1.0017	602.19	579.2	15.25	13.55	14.3	16.13	11.22	13.38	14.4	15.56	14.16	15.09	11.62	13.8	15.76	11.08	14.26	11.86	15.41	14.01	10.69	16.51	13.45	14.15	13.37	15.04	11.17	11.34	13.76	15.42	14.06	14.86	14.43	12.17	14.42	10.92	14.47	12.23	14.79	15.05	11.77	11.58	14.43	14.15	11.62
0.729853	-0.454323	0.203796	0.722593	1.00063	717.274	301.2	17.3	15.89	17.69	16.3	16.97	16.34	17.17	16.35	13.43	15.51	14.16	13.73	13.97	16.89	15.84	16.83	17.43	16.91	16.96	17.7	15.19	17.55	16.77	15.97	16.34	17.24	17.5	16.18	16.41	16.66	15.63	17.72	15.97	17.05	16.74	14.74	16.46	16.85	15.2	16.87	13.28	15.03	14.53
0.737937	-0.43843	0.559733	0.892603	1.00023	302.626	391.1	13.64	15.18	16.33	14.6	14.5	17.43	15.62	15.9	16.24	15.32	13.91	16.83	16.8	16.12	18.11	14.43	17.76	17.36	16.6	15.58	15.49	14.96	16.21	15.69	16.15	15.94	16.33	15.5	15.5	15.63	15.94	17.58	16.14	15.52	18.12	15.84	17.58	17.08	18.57	15.7	14.95	15.83	14.26
0.647343	-0.627398	0.933591	0.993033	1.0002	290.638	374.4	12.1	17.45	17.22	16.13	16.17	17.43	15.78	17.96	17.31	15.72	14.41	16.75	16.91	17.08	12.04	16.93	18.36	18.22	17.01	18.08	17.02	16.04	17.64	16.79	15.36	16.2	16.43	15.81	16	17.57	17.78	18.5	15.69	16.53	11.97	15.33	17	18.69	17.58	18.05	12.28	17.03	18.2
0.662889	-0.593161	0.367469	0.811688	0.999374	418.665	48.3	17.71	19.47	14.94	14.8	14.85	18.47	16.98	17.58	18.53	14.4	15.18	15.05	15.2	17.46	19.91	15.71	15.27	17.37	19.31	18.11	16.97	17.08	18.35	17.28	17.78	17.2	18.5	14.43	17.9	17.75	17.08	19.39	18.9	17.52	17.65	19.48	14.63	15.69	17.23	16.13	17.26	16.56	18.29
1.59148	0.670366	0.536848	0.880026	0.997352	234.071	374.7	14.4	12.83	16.21	13.29	12.1	14.49	14.51	12.65	15.05	15.23	11.83	15.37	15.53	13.87	14.61	12.1	15.81	14.84	15.93	15	14.48	15.29	13.9	11.64	11.41	14.67	11.05	13.48	12.2	10.71	11.47	12.44	15.57	14.81	15.18	12.53	10.86	10.32	12.07	11.91	13.37	14.41	15.12
1.39999	0.485419	0.314925	0.792819	0.996064	446.272	320.1	17.58	16.14	16.58	17.51	17.85	17.39	17.92	17.06	17.58	18.02	16.48	18.57	17.38	18.15	17.36	13.98	17.95	17.98	18.18	17.68	13.1	13.84	17.01	17.73	17.48	17.43	17.44	17.6	18.42	17.71	17.53	16.78	16.99	18.38	18.01	17.63	17.06	16.95	14.59	17.5	17.74	17.35	17.88
0.747547	-0.419763	0.196275	0.714986	0.995442	330.265	315.1	18.47	17.8	16.08	16.01	16.03	19.2	19.19	15.88	19.45	18.64	19.12	19.58	17.93	17.97	19.06	18.7	17.17	17.65	15.96	18.34	18.55	18.42	17.15	18.27	19.63	17.57	19.78	18.7	16.3	18.64	19.55	18.43	18.79	18.94	18.68	17.39	19.17	18.71	19.01	18.03	19.71	18.04	20.25
1.41017	0.495871	0.210644	0.728905	0.995296	149.059	244.1	16.96	16.29	14.35	15.29	17.25	17.09	14.05	17.05	16.8	17.69	17.1	17.81	14.57	16.58	17.45	18.2	14.69	17.32	17.65	14.85	16.8	16.43	16.55	17.1	16.63	17.29	14.18	16.62	14.48	13.62	14.35	14.88	14.11	16.86	17.58	16.11	16.18	17.06	14.86	14.64	14.1	16.5	17.53
1.44393	0.53	0.179966	0.703149	0.995014	443.353	453.9	12.44	17.15	15.93	15.69	16.52	15.5	17.38	16.66	15.44	16.26	15.06	16.72	16.7	15.67	17.18	17.58	16.06	14.92	16.63	13.01	17.11	16.84	16.72	14.71	15.32	16.47	15.22	16.08	17.8	17.92	14.58	15	12.65	15.23	14.01	16.27	15.51	16.18	13.13	16.03	17.16	14.96	13.02
1.35001	0.432968	0.232838	0.752396	0.994797	936.766	41.2	17.93	17.75	17.66	18.34	18.37	17.81	17.76	17.21	18.42	19.13	18.1	16.7	17.04	18.27	17.59	18.82	17.73	17.69	17.8	14.61	19.45	18.13	17.88	17	18.03	16.04	18.45	17.19	18.7	16.71	14.05	17.93	17.83	17.07	17.87	18.12	16.94	17.61	14.65	15.2	17.6	18.43	18.55
1.34148	0.423828	0.283285	0.789603	0.994794	330.226	279.5	17.75	17.64	17.75	18.04	18.29	17.84	18.12	17.49	18	18.2	18.07	18.51	18.08	14.99	17.76	18.83	15.86	17.93	18.27	17.71	17.76	14.67	17.61	17.62	18.84	17.92	17.95	17.57	18.54	17.54	14.08	17.69	18.04	17.83	17.68	17.68	17.44	17.74	17.82	16.42	18.22	17.77	14.78
1.80051	0.848409	0.0300576	0.453691	0.993959	1282.92	426.1	14.23	19.54	19.77	19.27	18.83	19.88	13.82	19.1	19.04	18.32	18.82	18.06	20.26	14.07	15.2	18.43	18.37	18.49	19.12	14.67	14.11	14.72	19.72	19	14.13	14.01	19.05	17.74	18.75	18.82	14.11	14.72	18.93	18.38	14.31	14.97	19.27	19.35	14.72	14.42	18.53	19.53	14.83
1.58577	0.665183	0.341511	0.805311	0.992947	1273.6	482.9	15.36	15	17.75	15.42	13.51	12.73	14.16	14.56	17.13	15.86	16.52	17.29	17.41	14.16	16.25	14.69	14.53	12.78	17.26	12.47	15.5	12.55	16.38	15.6	16.5	11.8	16.16	16.33	16.42	15.71	15.35	12.79	13.25	16.65	18.18	16.75	15.01	13.55	14.89	15.71	16.09	10.35	12.35
0.603156	-0.729398	0.417986	0.83566	0.991257	431.386	551.5	17.64	16.39	12.6	16.43	14.23	15.31	12.54	18.83	15.56	13.98	13.18	12.65	15.77	13.78	16.24	16.24	13.22	15.55	15.91	16.96	16.91	15.37	17.91	13.05	14.63	12.92	12.51	17.44	12.67	16.52	16.68	17.88	12.13	13.18	17.33	18.04	15.51	16.91	16.53	15.93	13.19	16.43	19.39
1.29216	0.369785	0.0798332	0.591445	0.989863	108.08	301.7	15.58	17.67	18.04	17.43	17.41	16.82	17.29	17	17.78	17.19	17.46	17.73	17.84	15.43	15.58	18.47	17.7	17.13	17.41	18.15	17.73	18	17.11	18.12	15.46	15.31	17.06	15.05	17.37	17.47	17.53	15.58	16.35	16.39	15.74	15.91	17.34	16.8	17.11	16.97	15.42	15.1	15.98
0.753241	-0.408817	0.305021	0.792819	0.989446	332.047	65.3	13.92	16.68	13.75	16.72	17.1	15.86	16.89	16.26	15.74	14.07	16.75	17.1	13.91	16.05	16.6	16.41	14.05	17.55	16.42	17.66	16.63	16.14	16.73	16.2	16.4	13.74	17.13	16.38	16.59	16.35	17.11	14.47	16.21	16.24	16.9	16.38	16.67	17.01	16.97	16.1	16.65	16.39	14.5
0.770629	-0.375892	0.718926	0.941395	0.988957	474.265	463	13.97	15.23	16.52	16.47	16.01	18.23	13.48	16.96	17.77	16.07	15.94	16.51	16.9	16.91	13.89	17.62	17.56	17.22	15.77	17.54	15.75	15.16	15.69	16.18	16.26	16.62	16.44	15.35	15.47	16.24	16.84	16.71	17.15	16.1	16.86	16.08	17.41	17.24	16.75	15.78	16.52	16.04	14.56
1.34599	0.428667	0.294405	0.792819	0.988894	693.021	75.3	16.54	14	12.86	16.32	15.73	16.42	16.09	15.96	15.48	15.58	16.43	16.01	16.63	16.11	16.22	14.02	16.85	16.57	15.58	16.39	13.99	17.12	15.09	15.89	13.19	16.4	14.43	15.86	15.48	15.55	16.09	14.03	13.91	15.18	13.15	14.11	16.21	15.87	15.96	13.53	16.56	16.26	16.4
2.12668	1.0886	0.102154	0.610923	0.98849	506.531	36.1	8.63	17.81	17.06	18.03	17.42	16.25	13.81	17.74	18.3	15.58	16.55	15.69	16.83	15.36	16.99	9.47	16.77	15.07	17.43	14.92	18.16	17.66	16.97	15.83	18.3	16.39	16.28	12.39	18.61	17.57	16.89	16.73	15.19	17.12	8.17	9.71	14.59	16.99	9.35	15.09	15.7	17.4	9.15
1.31631	0.396495	0.42031	0.83707	0.987492	626.246	394	16.43	16.61	17.76	16.91	16.37	16.48	17.61	16.79	16.34	17.59	18.21	16.62	19.34	16.91	16.7	17.86	17.66	14.26	16.46	14.94	16.71	18.48	16.47	16.29	16.86	17.01	16.74	16.69	18.21	16.42	14.4	14.94	16.4	18.84	17.76	17.66	16.74	16.1	18.33	15.76	16.86	17.06	18.12
1.3295	0.410882	0.254245	0.78046	0.987426	562.281	386.3	20.27	22.63	22.79	22.68	22.47	22.58	20.07	21.9	22.7	22.47	23.04	22.44	22.3	22.6	23.07	23.51	22.6	22.52	22.68	19.92	20.36	24.04	20.82	22.75	20.1	22.39	21.8	22.9	22.4	22.52	19.8	22.05	22.46	22.63	20.34	22.57	22.49	21.99	20.03	22.24	22.77	22.4	20.05
1.35301	0.436172	0.206362	0.722593	0.98737	85.5095	36.2	14.65	17.75	18.02	13.75	17.15	16.85	14.67	13.08	15.26	16.96	15.14	14.53	15.75	14.87	15.44	13.46	15.7	15.11	17.38	15.6	15.79	15.41	16.43	14.47	15.68	15.11	16.18	15.11	13.22	14	15	15.48	13.17	15.45	13.82	13.57	16.85	15.79	15.06	15.29	15.05	15.36	16.13
0.579786	-0.786409	0.0609231	0.562925	0.98723	666.252	339.7	18.52	20.02	15.4	15.35	21.46	15.36	20.77	15.22	20.03	20.66	15.59	20.17	16.57	18.73	18.42	18.32	15.65	15.35	21.24	18.81	17.12	19.63	19.16	20.46	17.63	21.84	20.63	20.94	15.6	19.45	19.32	19.16	15.3	21.57	19	18.18	18.72	17.28	19.94	21.85	21.43	20.54	20.28
0.775989	-0.365892	0.325026	0.794027	0.98719	372.312	351.7	18.66	18.6	16.98	19.12	20.08	20.09	19.72	20.1	20.04	20.06	18.92	20.33	19.21	18.58	18.37	17.41	18.81	19.88	19.05	18.57	18.83	18.73	20.23	19.8	19.55	19.71	20.37	19.18	19.81	20.38	20.22	21	20.72	20.54	18.21	19.35	19.88	16.73	20.01	19.82	19.07	19.63	20.79
1.35891	0.442452	0.759787	0.952403	0.98704	245.267	328.6	14.62	14.8	12.45	14.36	14.56	13.86	14.11	14.03	14.22	13.12	13.04	15.49	16.09	12.68	17.01	13.71	13.1	14.55	13.3	16.57	12.79	13.52	11.8	12.88	14.24	14.16	13.93	14.51	14.46	11.86	14.19	16.38	11.92	13.75	14.57	13.8	14.22	13.66	13.55	13.2	14.13	12.81	15.91
0.599302	-0.738645	0.0627012	0.567262	0.98624	442.159	309.8	16.15	17.91	17.23	12.04	19.48	12.23	18	13.03	17.56	19	17.31	18.08	14.85	16.28	16.88	15.56	16.2	16.63	19.11	17.25	14.96	17.59	16.88	17.41	15.31	19.77	18.76	18.66	17.27	16.72	17.88	16.44	11.91	19.44	17.21	14.59	17.09	15.61	18.2	19.55	19.69	18.64	17.59
0.533106	-0.907505	0.536232	0.87965	0.985786	738.421	595.1	11.12	8.73	15.7	14.06	13.61	16.92	14.07	9.01	14.47	15.81	16.16	9.59	9.76	14.74	16.31	15.25	15.83	14.36	15.4	10.05	10.61	10.32	15.57	16.45	15.65	9.59	15	14.67	13.29	14.23	15.03	14.26	13.74	15.69	14.78	16.3	14.48	15.18	15.9	16.2	17.28	14.11	16.35
1.36291	0.446688	0.225548	0.747495	0.984331	757.447	519.1	14.95	14.33	13.91	14.21	13.92	15.35	13.57	13.38	14.69	15.63	15.7	14.59	14.72	15.68	15.98	12.02	16.02	15.4	11.74	14.52	15.44	15.82	12.75	15.66	14.51	15.3	13.42	12.93	14.13	15.11	14.19	15.42	15.07	13.4	13.97	12.36	15.58	15.64	15.51	11.75	14.24	12.62	14.09
1.36122	0.444903	0.24893	0.775269	0.983959	428.228	519.6	15.8	14.92	15.5	14.88	15.03	14.94	15.14	15.03	15.07	15.2	15.13	15.26	15.67	16.49	15.77	15.4	15.09	15.16	14.87	16.44	15.77	15.53	14.01	15.14	15.77	15.5	13.66	14.56	15.38	14.19	15.13	15.49	15.14	15.24	15.32	16.48	14.88	14.73	15.72	10.8	15.15	14.51	16.19
0.713162	-0.487699	0.311097	0.792819	0.983248	188.978	359.3	17.71	17.17	17.74	17.02	13.5	17.28	13.65	16.03	17.67	13.1	18.17	13.87	17.36	17.96	18.54	17.26	17.66	16.96	15.59	17.38	16.73	17.6	16.85	17.66	17.36	17.34	17.24	15.48	17.27	17.51	17.31	14.59	16.62	17.97	17.89	16.86	17.5	14.4	16.58	18.18	17.22	17.15	17.59
1.86985	0.902925	0.332613	0.797904	0.982324	212.979	227.3	16.44	10.96	11.12	16.35	10.66	11.92	16.64	16.97	15.83	15.98	17.25	15.88	15.05	15.09	14.67	12.31	11.74	17.36	16.25	12.29	14.91	12.36	10.54	16.96	11.6	11.69	11.23	10	15.24	15.58	11.64	12.57	16.66	15.8	11.52	12.72	15.05	10.43	16.09	16.11	10.96	16.63	17.43
0.473255	-1.07931	0.489981	0.87101	0.982044	187.148	508	13.79	11.98	7.37	7.16	6.38	13.32	15.56	14.59	15.36	14.7	8.31	15.12	15.85	7.37	7.16	11.4	14.57	15.65	13.43	13.7	12.76	8.73	13.14	15.43	15.6	13.34	12.38	12.61	14.62	13.9	14.63	15.82	7.93	11.52	13.53	9.01	14.7	13.61	14.02	13.46	8.05	11.85	10.09
1.47293	0.558688	0.525792	0.873038	0.981559	595.38	450.2	18.06	17.61	18.43	17.84	17.51	17.02	19.69	16	18.49	18.59	16.68	19.95	17.92	18.4	19.3	14.77	18.06	17.26	13.65	18.22	18.18	19.83	19.3	18	18.35	18.41	18.35	19.12	13.83	17.5	17.89	17.17	14.74	18.61	18.14	19.03	18.79	17.49	18.12	17.67	13.39	18.26	18.55
0.715835	-0.482301	0.110417	0.612862	0.981388	404.219	369.3	14.81	13.36	15.69	15.27	17.09	14.07	13.43	14.02	14.52	13.38	12.78	14.13	15.14	15.05	14.29	15.28	13.68	17.3	14.68	15.55	16.33	18.04	13.21	12.65	14.8	14.57	13.55	16.16	12.31	16.91	13.89	13.49	13.86	13.48	15.16	15.75	14.04	14.59	15.17	15.98	15.74	15.7	15.38
0.722826	-0.46828	0.287766	0.789603	0.980585	257.977	38.3	16.09	16.79	17.05	16.85	15.47	16.43	17.06	13	16.43	12.91	16.66	10.66	16.01	15.52	17.42	17.98	17.06	15.88	15.61	16.8	16.53	17.22	15.88	15.54	16.41	14.84	15.88	14.41	15.67	16.54	15.77	17.66	15.26	15.38	15.74	16.49	16.88	16.48	16.11	15.52	15.39	15.61	16.71
0.728006	-0.457978	0.163459	0.694957	0.979137	1050.74	42.4	18.34	16.72	20.25	16.75	17.21	18.71	17.99	17.17	17.93	18.61	14.72	17.48	13.69	17.13	17.74	18.21	19.08	18.32	17.92	18.08	18.33	17.92	17.83	16.33	18.63	17.42	17.5	18.28	18.31	15.39	20.04	18.43	17.53	17.26	17.39	18.66	17.89	17.96	17.78	18.07	17.69	17.42	14.29
1.32663	0.407763	0.156193	0.691709	0.97756	953.78	41.3	17.8	17.63	19.42	17.79	19.03	19.57	17.52	18.94	17.83	19.36	17.99	18	17.54	15.41	18.43	18.01	18.68	17.83	18.48	14.13	14.4	18.75	18.4	18.32	18.75	19.24	17.22	17.36	17.74	17.15	18.01	17.31	17.43	17.15	17.84	18.67	17.32	18.49	18.77	18.65	16.64	17.27	18.3
1.51147	0.595957	0.755911	0.950421	0.977001	185.184	360.4	18.46	13.41	16.1	17.34	18.03	17.17	18.35	17.6	13.66	17.25	18.19	17.8	16.87	18.14	19.1	14.88	17.77	16.92	17.5	17.6	17.72	18.3	16.84	14.13	17.48	17.93	15.81	17.49	18.02	13.13	17.33	14.63	17.95	17.94	15.57	15.52	18.48	13.23	14.64	18.33	17.45	16.35	17.29
0.627655	-0.671957	0.530693	0.875497	0.975395	790.095	585.9	11.55	14.71	15.45	14.48	16.16	15.05	11.12	16.09	15.68	16.85	16.23	16.61	12.66	11.63	16.97	16.19	16.51	16.11	15.52	12.39	15.44	16.48	16.09	16.91	11.68	16.49	15.46	16.22	16.62	15.75	11.77	16.17	16.08	15.92	16.68	17.1	16.19	16.56	16.47	12.2	16.12	16.41	12.23
0.730375	-0.45329	0.629676	0.915176	0.975314	1040.18	428.3	17.14	17.13	14.95	18.73	16.74	19.09	17.99	17.58	18.22	15.89	15.19	15.06	16.51	16.85	15.05	17.44	15.27	18.32	17.26	17.77	17.07	15.35	18.32	18.3	17.04	16.12	16.06	16.44	17.71	18.37	18.15	19.22	16.84	17.88	15.23	16.61	18.87	17.52	16.94	17.83	16.97	18.23	19.15
0.757463	-0.400753	0.146233	0.678639	0.973206	581.18	446	15.72	15.04	15.54	14.7	14.38	14.83	15.1	15.79	13.55	16.32	15.75	18.21	14.89	16.17	16.16	15.84	14.52	15.04	15.1	15.75	14.06	15.21	15.2	17.08	14.26	16.66	15.42	15.48	16.26	16.96	14.95	16.62	15.62	15.74	17.31	16.28	15.21	15.19	16.68	17.8	15.33	16.49	16.67
0.749992	-0.415054	0.403677	0.82494	0.97242	195.138	330.2	18.12	17.27	18.34	18.1	16.89	16.51	14.81	17.57	18	14.64	15.36	16.98	18.06	18.06	16.34	17.91	17.72	17.57	18.51	15.54	18.36	18.53	18.18	16.38	17.97	15.02	17.98	17.98	18.83	16.91	15.11	15.36	18.26	17.12	17.76	17.96	17.3	17.53	15.54	18.02	18.13	18.1	17.92
1.36007	0.443677	0.273634	0.786816	0.970921	257.266	516.9	16.46	18.7	17.85	16.15	16.13	15.59	17.4	16.24	15.79	18.91	14.47	17.34	17.12	16.69	14.67	16.73	16.19	19.09	15.46	16.91	18.38	17.56	17.66	15.29	15.06	16.11	14.78	16.64	15.16	15.79	15.52	16.49	15.23	15.25	15.8	15.63	15.55	18.13	15.84	15.13	14.57	15.17	16.06
1.64873	0.721355	0.149982	0.683551	0.970853	243.053	52.5	20.66	16.97	18.7	18.49	17.54	18.6	16.18	18.84	16.54	18.07	18.73	18.82	18.96	23.14	18.49	14.36	17.8	17.26	18.78	18.87	16.18	14.22	18.31	19.21	14.4	13.45	18.43	18.49	19.66	16.61	18.96	22.04	18.78	18.48	18.81	22.22	18.31	18.17	18.94	14.79	16.02	18.75	19.24
0.570526	-0.809634	0.466055	0.857418	0.970496	420.157	281.3	15	16.8	15.49	15.49	15.42	10.58	16.5	15.5	15.48	9.86	15.23	11.04	11.16	15.76	14.76	16.07	16.8	10.69	16.16	11.81	15.09	11.88	16.65	17.54	12.12	16.99	17.16	16.09	10.9	13.86	16.1	12.05	15.76	15.4	17.54	15.87	15.69	16.37	16.25	15.88	10.47	16.47	15.75
1.22651	0.294559	0.085937	0.597324	0.969478	869.513	517.3	14.28	15.74	16.09	15.2	15.4	16.1	14.98	17.63	15.63	16.01	16.03	15.43	16.88	15.98	16.69	15.01	15.67	15.62	15.5	16.28	16.1	16.77	15.34	16.42	14.16	16.82	15.83	14.98	17.28	16.22	15.09	14.74	15.95	15.08	14.34	16.79	15.61	16.32	14.74	14.44	15.39	15.89	14.86
2.07445	1.05273	0.644299	0.922303	0.969395	139.112	325.7	16.9	16.25	19.22	18.45	13.7	10.25	16.57	11.23	16.56	18.25	11.19	18.17	16.75	17.37	18.46	11.57	10.92	19.09	10.47	11.55	15.96	19.18	13.51	17.21	16.5	15.33	17.05	16.09	16.07	16.61	15.57	14.48	17.29	10.54	15.62	11.78	10.41	9.97	17.51	17.42	17.15	15.27	18.22
0.759464	-0.396946	0.462804	0.855676	0.968503	383.274	373.8	16.84	17.41	16.25	16.3	17.72	18.31	18.02	17.74	17.25	17.17	17.84	16.12	19.19	17.25	14.36	16.15	17.72	15.69	18.71	16.11	16.27	14.93	17.67	17.45	16.28	17.6	17.4	18.12	18.08	17.9	17.4	18.4	18.92	18.34	16.82	17.42	17.59	16.94	18.12	18.13	16.96	17.86	18.53
1.31548	0.395591	0.611699	0.90705	0.968254	318.886	366.4	17.39	16.94	16.62	15.97	16.8	16.59	17.06	16.42	17.12	18.14	17.21	17.33	16.97	17.36	17.73	15.97	13.95	16.28	16.09	16.85	17.54	16.82	16.25	17.51	17.17	16.87	17.81	16.84	17.48	17.8	15.9	14.4	17.1	18.07	17.91	18.37	16.46	16.26	14.41	17.5	17.59	16.79	14.4
1.89491	0.922129	0.0689769	0.574409	0.967909	367.991	568.7	9.28	14.11	15.31	16.15	15.46	13.83	13.92	14.1	13.1	16.34	15.83	14.93	15.28	16.22	14.93	15.93	15.63	15.67	14.91	8.92	12.88	9.08	13.8	16.08	15.23	8.17	13.6	15.58	14.93	15.16	7.93	14.52	15.71	15.52	14.3	9.21	14.96	15.51	14.47	9.01	15.93	15.02	16.52
1.42907	0.515075	0.273267	0.786816	0.967694	139.075	299.2	14.89	18.41	18.98	18.19	18.52	18.42	18.45	18.29	18.17	15.42	17.8	18.52	18.41	17.59	17.8	15.49	18.38	14.62	14.67	18.65	18.73	15.15	18.09	14.86	18.36	18.29	18.47	18.31	18.8	17.67	18.35	15.12	18.19	18.51	18.57	15.38	14.41	16.93	17.73	18.59	18.4	18.22	16.47
1.43464	0.520688	0.179474	0.703149	0.966859	140.995	563.9	16.9	16.67	13.7	17.14	16.65	14.52	15.88	18.01	15.11	16.44	16.43	17	16.84	16.85	16.08	14.61	14	16.48	17.09	14.33	13.75	14.42	15.37	16.94	16.23	13.7	17.3	16.37	13.64	17.39	16.32	14.43	18.11	16.83	17.09	17.67	15.94	17.94	16.16	16.35	16.45	12.65	16.9
1.30346	0.382344	0.324872	0.794027	0.966694	195.009	370.7	17.53	17.24	17.93	17.35	16.86	17.07	17.68	16.91	18.3	18.21	17.73	14.58	15.79	16.96	14.6	15.32	16.86	16.97	17.7	17.48	17.69	17.2	17.29	18.12	17.09	17.47	16.7	17.07	16.46	16.55	16.98	16.14	16.66	16.92	16.21	17.6	14.15	16.32	15.03	14.78	17.87	16.64	15.17
1.4349	0.520946	0.198146	0.718368	0.966461	518.32	423.1	24.73	24.43	25.05	25.05	25.37	24.81	24.58	25.05	24.81	22.17	24.89	24.18	22.82	24.89	24.21	24.96	24.81	23.26	24.96	24.29	24.51	25.13	24.89	24.96	25.37	24.73	25.05	24.81	25.53	24.81	20.97	20.89	24.96	24.38	24.73	21.46	24.43	24.73	21.18	25.13	25.25	24.89	21.19
1.28618	0.363097	0.0467026	0.520144	0.96638	343.044	62.9	14.33	16.32	17.36	16.08	16.86	16.85	13.92	16.5	16.56	16.43	16.6	16.79	16.5	14.15	16.34	15.89	16.88	16.47	17.19	14.74	14.23	14.79	16.56	16.82	14.23	16.76	16.43	15.15	16.71	16.42	14.18	14.79	16.62	15.99	14.42	15.05	16.27	16.05	14.79	15.81	16.46	16.46	14.9
0.719022	-0.475892	0.110119	0.612862	0.966295	247.173	54.1	15.46	17.02	17.79	12.4	15.14	12.51	16.12	15.54	13.68	14.87	15.77	12.91	16.22	14.46	15.22	14.03	15.92	12.65	14.02	15.99	15.09	14.58	13.92	16.13	16.8	17.08	14.95	14.08	17.59	15.68	16.78	14.04	15.76	17.24	16.3	15.44	15.1	15.58	16.51	14.95	16.35	16.29	16.19
1.98284	0.98757	0.546574	0.884349	0.965342	1110.66	519.3	15.39	14.13	15.79	14.64	16.56	14.59	15.95	9.65	9.28	16.16	16.26	14.27	16.07	14.8	14.33	16.36	17.75	16.88	14.98	17.39	14.19	16.95	9.15	10.25	15.88	16.05	10.76	14.11	9.97	15.84	15.17	10.96	9.71	10.71	9.82	10.94	17.3	16.38	10.66	10.38	16.23	12.75	15.81
0.796901	-0.327527	0.48323	0.867754	0.964204	197.128	59.3	16.18	17.88	16.97	13.36	17.65	15.39	18.23	17.88	17.18	17.36	16.15	17.27	16.98	15.4	17.17	17.3	16.62	16.99	17.5	15.54	18.07	16.37	17.4	18.29	16.92	16.6	16.04	16.69	16.83	17.65	17.52	16.88	16.24	17.53	17.99	17.12	16.81	17.5	18.21	16.46	16.77	16.94	17.29
1.51299	0.597398	0.172869	0.701834	0.96403	93.5031	363.5	18.23	17.78	17.76	16.63	17.31	16.73	15.57	17.81	17.86	18.35	19.45	17.9	17.43	18.33	13.7	17.57	13.13	16.51	16.86	17.17	19.02	17.66	16.53	18.63	14.82	17.61	15.73	18.1	17.41	15.5	16.32	13.79	15.88	12.23	18.63	13.85	18.64	18.11	18.84	19.09	16.07	17.88	17.21
1.26278	0.336602	0.420696	0.837272	0.963611	553.252	487.1	15.23	17.62	17.61	18.18	17.65	17.46	16.9	17.62	17.8	19.43	17.68	18.28	18.18	18.19	18.94	18.29	17.13	18.08	17.77	15.47	17.71	18.35	17.49	18.3	17.26	17.5	17.19	16.93	17.89	18.07	16.04	15.33	16.67	17.92	19.07	18.37	17.31	16.22	18.36	18.34	18.11	17.53	15.69
0.52275	-0.935806	0.52843	0.874073	0.963458	987.645	384.3	16.74	18.55	12.47	16.42	17.15	18.18	19.16	19.59	20.28	16.26	13.07	18.03	19.23	19.23	12.74	19.58	20.16	19.89	19.65	19.52	18.14	17.37	20.45	12.93	18.99	19	17.81	18.29	17.27	19.63	19.27	19.85	11.97	12.18	17.79	18.57	19.35	19.19	18.04	19.5	13.05	20	20.49
1.3855	0.470409	0.346122	0.807281	0.963389	969.8	41.3	18.07	18.98	18.9	17.65	18.85	19.56	18.82	18.34	16.76	18.5	17.96	18.35	14.8	19.53	18.72	18.36	14.87	14.42	17.73	18.83	19.44	18.17	18.35	17.42	19.85	19.08	16.28	18.83	18.85	17.44	15.49	19.03	18.37	16.44	17.75	18.13	18.93	17.57	19.2	16.85	15.76	17.37	17.65
0.749276	-0.41643	0.229849	0.751123	0.963022	737.504	458.7	15.04	16.94	16.31	16.26	14.15	16.62	16.19	16.36	13.14	16.95	13.92	13.43	15.66	16.89	13.6	16.51	16.15	16.21	15.38	16.7	16.69	16.22	16.6	13.7	15.87	15.69	15.23	16.69	16.21	16.37	15.74	16.55	17.03	16.02	16.87	14.52	16.06	12.67	14.33	15.85	16.15	14.99	16.65
2.21881	1.14978	0.601236	0.904319	0.961524	412.283	314.9	22.93	20.47	14.57	21.06	20.2	22.5	20.28	14.23	20.75	15.8	21.92	23.18	20.22	20.39	24.25	19.02	15.8	20.35	20.8	15.03	14.6	20.99	13.96	19.83	14.53	23	21.63	21.69	14.7	21.13	22	23.4	21.24	23.35	21.12	15.25	14.18	13.94	22.08	18.92	20.59	19.69	21.74
1.31016	0.389742	0.14121	0.674842	0.961053	92.5032	562.9	16.14	16.48	17.53	14.81	17.24	16.7	14.59	17.68	16.86	17.65	17.15	17.76	15.2	17.2	17.09	15.72	17.61	14.9	16.89	15.37	17.05	16.89	16.53	17.52	14.96	14.81	14.79	17.57	17.35	14.39	14.94	17.2	16.88	17.29	15.22	17.27	16.65	16.84	16.77	17.48	16.79	14.46	17.46
1.27709	0.35286	0.0708089	0.574409	0.957905	404.004	42.3	16.59	18.8	18.94	18.85	19.12	18.49	16.24	18.2	17.99	17.92	19.09	18.29	17.51	16.42	18.73	18.59	18.79	18.68	18.19	16.68	16.61	17.85	18.65	18.07	16.41	16.29	18.78	18.95	18.11	18.39	16.37	16.37	18.55	18.32	16.74	16.79	18.76	18.73	16.65	16.51	18.03	18.13	16.75
0.693329	-0.528387	0.614216	0.907259	0.956898	492.215	383.2	14.4	15.03	17.32	12.72	16.02	15.8	15.76	16.17	16.37	12.8	14.41	14.92	16.52	15.72	11.49	15.83	16.21	16.58	15.17	16.39	15.44	15.32	16.28	15.35	11.45	15.97	15.12	14.96	12.21	15.52	16.24	16.85	15.55	15.48	15.65	15.54	16.81	15.24	15.31	16.63	11.83	16.59	17.13
2.00765	1.00551	0.576512	0.899995	0.956897	430.293	315.4	22.88	20.4	17.04	20.36	20.08	22.26	20.35	15.18	19.55	16.18	22.6	23.11	19.97	19.51	24.29	16.06	19.05	20.46	20.93	15.73	15.48	20.75	14.96	19.77	15.39	22.44	21.58	21.48	15.58	21.06	21.26	23.66	21.24	24.04	20.4	15.85	15.12	14.96	21.71	18.57	20.58	19.42	22.15
0.76247	-0.391247	0.198992	0.71858	0.95653	798.823	42	17.59	18.54	15.21	18.1	17.5	17.02	17.87	17.21	17.31	14.73	17.21	15.29	15.45	17.44	17.2	17.93	18.35	15.16	15.17	18.21	17.86	17.71	15.9	16.51	17.59	17.56	17.81	17.12	15.41	17.15	17.49	17.97	17.94	17.81	18.39	17.31	16.91	18.14	19.29	17.66	19	16.06	15.8
1.67284	0.742301	0.425676	0.838076	0.953607	435.202	519	16.2	15.83	15.48	14.41	12.01	15.63	9.76	14.92	15.14	16.2	14.27	14.94	15.5	15.64	15.49	14.76	14.54	15.54	10	10.69	16.42	16	9.21	14.72	15.82	14.67	10.8	14.94	15.28	15.19	10.28	14.22	14.4	12.86	15.94	15.68	12.68	15.59	14.83	10.47	15.67	15.96	10.78
1.7839	0.835032	0.147137	0.680762	0.951627	432.772	45.4	13.26	17.14	18.45	18.77	18.63	18.62	20.14	18.22	18.28	18.79	19.6	18.65	17.82	20.69	17.53	13.99	18.97	18.89	18.48	13.76	18.47	20.93	20.02	18.91	13.14	19.7	19.87	18.69	18.25	20.72	13.06	19.32	19.27	18.97	19.39	15.24	13.38	17.08	13.89	17.44	19.38	19.34	13.78
0.810897	-0.302409	0.244598	0.768054	0.950595	236.095	64.3	17.06	17.25	13.78	16.54	17	15.97	17.12	16.21	15.17	14.13	16.91	16.57	17.25	17.15	17.07	17.49	15.79	17.37	16.85	17.55	17.1	16.06	16.96	16.24	16.22	16.05	17.25	16.95	16.51	16.57	17.21	17.46	16.12	16.27	16.41	16.44	16.67	16.87	17.1	16.51	16.98	16.92	16.29
0.747859	-0.419161	0.126364	0.645366	0.950443	635.26	339.4	15.96	17.21	17.16	16.6	18.9	14.69	18.21	17.19	18.37	18.61	18.23	18.94	17.45	17.57	17.05	17.1	17.96	16.65	19.08	17.71	14.84	17.8	17.33	18.33	17.19	19.66	18.17	19.05	17.17	17.27	18.45	19.13	17.18	19.75	15.04	17.88	16.89	17.5	19.27	19.13	18.83	18.52	18.77
0.783859	-0.351333	0.54491	0.883174	0.94973	427.161	324.2	17.09	18.92	15.63	15.58	18.76	18.82	17.94	19.14	18.36	18.09	19.27	18.98	19.36	18.28	16.81	17.4	15.86	18.37	19	18.57	19.11	17.49	18.7	18.99	18.11	18.43	18.92	18.59	18.49	17.5	19.4	19.1	16.81	17.71	19.11	18.95	18.96	19.39	18.35	18.33	19.65	18.05	19.33
1.4621	0.548043	0.124761	0.645366	0.949356	680.928	434.7	14.79	18.75	18.64	18.05	17.28	17.65	14.28	16.19	18.04	17.98	17.42	18.38	18.1	14.57	16.82	15.41	19.07	17.95	18.09	15.1	14.7	15.07	17.25	15.74	14.6	18.61	18.37	18.66	18.16	17.39	14.59	15.06	18.75	17.56	14.89	15.3	17.17	17.36	15.1	14.86	16.43	16.32	15.25
0.743015	-0.428538	0.394724	0.823262	0.948992	440.773	517	14.72	12.32	12.76	14.78	12.16	14.64	14.13	14.26	15.62	15.41	15.63	16.35	15.79	16.08	13.08	13.94	13.34	16.32	15.07	16.21	15.54	14.54	14.98	15.07	15.17	14.49	14.57	11.62	12.83	15.4	16.13	15.93	15.18	14.52	15.99	14.05	15.28	16.09	15.88	16.02	14.14	15.96	15.15
1.27238	0.347527	0.392275	0.823169	0.948757	182.962	372.5	19.3	18.69	15.84	18.58	18.52	18.55	19.22	18.46	18.58	19.38	19.84	19.55	18.46	18.81	19.22	17.27	16.02	18.2	18.63	18.98	19.27	18.6	18.72	19.01	19.07	19.48	18.82	19.04	18.39	18.55	18.66	16.97	18.81	15.51	19.36	18.45	18.75	18.09	18.7	18.21	19.13	18.79	18.9
1.30897	0.38843	0.190261	0.707381	0.948325	459.246	420.4	21.94	21.85	19.25	22.47	21.94	22.23	22.19	22.34	21.5	21.86	21.97	21.37	21.75	19.53	20.78	21.96	19.37	21.83	21.63	19.37	19.7	22.3	22.07	21.66	19.43	21.61	21.84	21.74	21.84	21.83	19.3	19.16	21.86	21.42	21.85	21.73	21.84	21.91	19.47	19.45	21.81	21.7	22.14
1.27743	0.353247	0.285348	0.789603	0.94768	493.375	370.8	18.47	19.62	18.4	18.21	18.08	18.11	19.19	19.03	18.1	18.4	18.42	18.15	19.7	18.78	17	18.88	19.16	18.28	19.19	18.51	18.55	17.93	18.44	17.61	17.84	17.45	19.17	19.8	15.99	18.32	18.87	17.58	18.77	18.39	18.06	18.74	17.96	18.04	18.2	18.1	19.4	15.43	16.25
0.61278	-0.706559	0.242951	0.766036	0.947208	590.589	46.9	19.34	12.97	19.47	17.86	17.22	13.22	19.79	18.98	18.44	18.28	15.67	13.51	13.77	17.2	13.68	14.52	13.92	17.17	19.8	17.91	17.56	17.88	17	19.38	17.63	17.23	17.42	13.88	13.55	16.92	17.82	17.51	17.66	17.3	18.16	14.6	18.1	18.09	19.62	17.54	18.14	19.56	17.12
1.89785	0.924366	0.306792	0.792819	0.946065	394.225	408.4	16.64	15.27	19.59	18.17	15.9	16.47	16.75	17.04	17.55	18.52	18.93	17.54	17.68	17.38	10	9.86	9.01	17.83	18.1	16.98	16.99	16.68	15.79	16.29	17	18.78	16.89	16.05	16.47	17.89	16.79	16.65	15.7	8.63	16.51	17.43	18.02	16.44	16.67	16.93	17.28	17.61	17.05
1.72936	0.790237	0.135989	0.664474	0.945392	365.105	51.5	17.49	17.88	18.87	17.54	17.96	18.59	15.65	18.14	17.36	13.44	15.99	18.16	16.56	13.95	13.18	18	18.11	15.13	12.74	13.82	14.1	17.43	16.39	18.43	17.4	13.14	17.96	18.79	15.19	17.23	16.63	16.62	15.22	12.45	13.22	18.94	12.6	12.13	18.84	18.81	18.63	11.95	17.61
0.699454	-0.515699	0.427521	0.838811	0.945381	386.185	503.6	13.05	15.21	13.3	15.65	15.52	14.78	13.38	14.97	15.54	15.25	15.18	14.8	14.19	12.85	10.28	15.75	14.66	14.42	12.67	14.9	14.37	12.01	14.54	14.15	13.13	15.9	16.28	15.71	15.46	11.16	14.98	16.5	16.41	13.26	15.51	16.43	16.48	14.17	15.34	16.32	14.55	13.08	16.45
2.39225	1.25837	0.446557	0.846936	0.945223	494.84	48.8	17.94	17.18	18.6	9.92	17.86	15.76	18.96	17.53	16.36	17.37	16.91	18.33	10.54	10.32	18.96	17.23	18.08	10.17	10.21	10.99	18.31	17.41	9.47	17.25	16.71	10.58	17.71	17.4	10.41	10.94	18.45	16.93	16.94	18.18	19.1	18.88	17.34	19	10.99	17.56	17.58	9.01	10.96
1.41905	0.504925	0.111466	0.614577	0.944829	514.914	47.7	18.81	18.57	18.54	18.43	19.63	19.1	18.65	19.23	16.52	18.15	18.41	16.78	19.04	18.38	19.6	14.67	19.16	18.98	18.89	19.49	18.16	14.43	18.53	17.88	18.1	18.4	19.46	18.1	19.51	18.84	18.84	14.46	19.67	18.78	18.27	14.7	18.36	18.8	18.03	17.86	14.58	18.53	18.46
2.06135	1.04359	0.0802189	0.591445	0.944693	121.076	56.1	10.54	16.62	17.62	17.76	18.18	19.28	17.64	17.57	18.06	12.79	18.75	19.23	18.01	15.87	10.8	17.17	16.5	10.32	10.38	17.17	18.43	17.12	17.28	17.97	16.47	10.83	17.36	16.73	17.62	15.21	16.72	18.32	18.42	16.35	10.54	17.85	10.17	18.07	12.42	16.7	15.17	17.67	18.12
0.717031	-0.479892	0.195409	0.712682	0.944339	174.953	549.7	22.5	22	21.95	18.29	18.43	21.7	22.2	21.75	21.54	22.49	18.32	18.44	18.29	22.23	22.67	20.79	22.09	21.35	21.64	21.83	22.3	21.6	18.2	22.36	21.93	20.69	19.34	20.74	21.31	21.82	21.32	21.27	18.27	21.2	22.47	22.09	21.99	21.83	21.89	22.05	21.09	21.69	21.56
1.44496	0.531032	0.0724903	0.574409	0.944245	1160.71	42.6	18.78	19.39	18.96	18.28	16.54	19.32	17.3	19.04	17.78	18.73	18.22	19.28	14.72	18.41	18.43	17.94	19.9	18.4	18.99	14.99	19.05	18.67	18.04	18.55	19.83	14.33	16.86	18.16	17.1	18.56	14.46	18.7	19.23	17.52	14.75	15.95	18.14	18.29	19.13	18.14	18.72	18.09	16.91
1.57811	0.658194	0.203754	0.722593	0.943276	894.703	44.6	17.49	17.78	19.21	20.87	18.3	18.52	12.91	17.96	18.53	18.04	18.63	19.02	17.96	18.11	18.98	18.05	17.83	19.26	19.32	17.97	19.61	18.13	18.08	14.28	13.3	18.67	18.06	18.36	17.88	18.27	13.27	17.53	18.8	17.79	13.34	18.92	18.1	19.37	14.07	17.88	18.31	14.48	18.32
1.60695	0.684323	0.494885	0.87101	0.943185	611.941	584.1	16.82	14.32	15.84	13.55	15.65	14.3	15.16	15.68	15.61	16.03	11.16	15.53	11.99	15.46	16.76	15.08	16.14	15.21	15.35	15.94	11.05	15.96	12.44	11.05	14.63	15.52	15.2	15.62	15.97	14.13	10.94	16.01	15.91	15.16	15.69	14.97	10.32	15.81	11.38	11.22	16.14	15.89	11.33
1.27701	0.352774	0.224903	0.746945	0.942692	102.091	392.1	19.54	18.25	19.04	19.1	19.97	20.37	19.37	17.32	19.34	17.25	19.3	19.01	17.42	18.56	18.85	20.11	18.55	18.33	19.51	17.49	20.28	19.91	19.28	17.42	19.08	17.17	19.32	17.2	18.89	18.65	18.78	19.31	19.18	17.08	18.75	20.13	18.53	17.15	17.4	17.37	19.13	18.4	17.55
1.44757	0.533634	0.383307	0.818486	0.942657	152.477	360.2	18.04	16.95	16.98	16.76	17.31	13.64	17.22	17.57	16	16.81	17.94	15.91	16.52	16.98	14.11	14.89	14.39	13.81	17.55	17.35	15.03	17.21	17.09	17.9	17.34	16.84	13.69	13	15.51	16.39	17.12	14.65	13.66	13.33	14.19	14.91	16.86	15.7	18.53	16.4	17.86	16.46	17.87
1.69036	0.757333	0.261706	0.783832	0.942102	374.29	326.1	16.56	16.91	11.29	16.72	17.52	17.36	17.91	15.1	16.74	16.77	12.18	17.2	15.74	15.43	16.38	12.73	12.05	17.32	17.52	15.99	17.32	12.6	17.62	14.86	15.29	14.75	17.71	15.35	17.29	11.85	17.55	17.59	17.59	15.05	18.09	12.93	11.19	15.43	12.52	12.3	17.38	14.95	17.53
1.30914	0.388624	0.680759	0.932328	0.941626	703.863	41.9	17.88	17.03	17.16	17.19	18.5	16.25	19.68	18.04	17.87	17.97	17.96	17.31	18.76	18.55	18.31	18.94	17.03	18.32	15.67	16.85	17.82	17.99	15.32	17.52	14.65	18.41	16.89	18.38	17.87	16.8	19.14	17.27	18.47	16.88	19.46	18.38	16.83	18.68	18.48	18.5	16.95	16.76	15.28
1.23847	0.308559	0.346602	0.807281	0.941304	388.901	37.6	16.18	16.1	14.33	15.8	14.67	15.55	15.55	14.75	15.9	15.65	14.89	17.71	16.5	15.33	14.57	16.3	15.12	16	12.97	16.82	15.89	14.8	15.44	15.72	15.71	14.28	15.21	15.04	15.1	15	15.89	16.76	14.23	14.24	15.38	14.31	15.21	15.31	16.39	15.18	15.83	14.53	15.53
0.666863	-0.584538	0.29998	0.792819	0.940872	401.266	476	16.25	15.88	15.99	15.63	16.23	12.04	13.1	16.68	15.89	11.41	16.58	16.15	12.61	15.22	17.58	16.77	16.18	15.81	16.41	15.35	15.83	16.7	17.13	16.11	15.92	16.68	15.58	15.69	16.75	17.19	15.53	16.61	11.81	15.11	16.11	17.97	13.67	13.36	16.14	16.24	17.18	17.13	16.61
1.27741	0.353226	0.511252	0.871788	0.94053	669.006	67.1	16.13	16.31	14.42	16.64	16.22	16.52	15.64	15.41	15.86	15.97	16.67	14.44	17.71	17.88	16.28	15.23	14.76	14.24	14.29	16.92	15.92	16.85	13.74	16.01	15.92	16.15	16.95	16.26	16.18	16.5	16.57	14.92	14.2	16.62	15.9	16.7	15.41	16.1	17.3	14.69	15.9	13.74	16.43
0.58091	-0.783613	0.075877	0.585694	0.940087	961.461	298.7	16.96	17.24	12.02	18.33	11.38	11.78	18.69	15.34	16.76	17.1	20.16	19.3	16.68	18.55	13.28	18.37	12.69	11.98	11.83	18.4	16.25	18.67	16.64	16.42	17.24	17.23	15.45	16.65	17.44	17.6	17.97	16.48	17.15	18.85	17.32	17.76	18.22	17.57	18.05	19.84	17.23	16.86	18.15
1.31331	0.393204	0.327747	0.794027	0.939862	956.792	41.1	17.01	16.53	18.15	18.24	18.41	17.47	17.22	18.23	17.75	17.93	17.58	17.92	14.8	18.94	17.81	19.54	16.88	14.43	17.28	15.03	17.8	18.09	17.99	14.69	16.96	17.07	17.97	18.47	17.87	16.63	17.68	17.98	18.22	17.57	17.48	17.52	17.5	17.05	18.15	17.78	17.91	16.88	15.19
0.706991	-0.500237	0.258568	0.783671	0.9386	397.313	343.6	17.14	14.75	14.04	18.22	17.18	16.65	15.29	16.83	16.04	15.42	14.36	14.01	16.45	16.99	14.12	16.84	15.31	15.92	13.89	15.78	16.93	16.98	16.04	14.16	15.16	16.74	17.47	13.08	16.58	16.07	15.94	18.76	16.65	18.87	17.21	18.07	15.43	16.23	18.7	15.99	13.7	15.07	17.58
1.60906	0.686215	0.214548	0.73469	0.938183	638.976	42.7	14.73	15.24	14.59	14.3	18.57	18.36	16.12	17.77	18.34	17.54	17.73	18.92	17.93	19.8	17.8	18.16	14.91	14.46	19.14	15.05	14.64	16.83	14	17.74	18.34	14.4	14.37	13.91	14.72	18.48	14.53	15.01	14.38	17.65	17.23	19.52	17.27	19.43	19.4	17	19.61	18.33	15.2
0.681139	-0.553978	0.184406	0.704727	0.937892	394.899	48.8	18.77	17.96	18.57	15.47	18.22	17.86	17.47	17.46	15.38	16.33	17.46	18.73	15.77	17.4	19	16.18	18.15	15.46	15.45	20.71	19.39	19.52	15.14	18.95	20	15.39	19.08	18.46	18.01	20.79	18.66	15.62	18.07	20.47	18.33	19.67	17.39	18.37	19.02	19.79	17.78	17.62	18.19
1.87306	0.905398	0.106967	0.612125	0.937666	552.341	403.8	11.83	16.42	18.07	18.11	14.96	18.25	16.63	18.06	17.84	11.64	17.67	14.7	17.68	18.09	18.11	17.85	17.7	19.26	18.33	12.55	16.84	12.66	17.76	16.73	11.86	17.42	11.45	18.22	11.66	16.78	11.93	12.89	15.01	17.58	16.35	17.63	18.84	18.03	12.6	12.36	16.9	15.87	12.46
1.37312	0.457462	0.122424	0.639495	0.937382	895.543	581.7	12.99	16.19	16.71	16.23	15.82	14.48	12.46	16	15.94	17.2	16.03	15.99	16.63	16.27	17.33	14.53	16.31	16.67	14.74	13.46	16.53	16.13	15.35	16.64	15.67	15.63	15.96	15.41	16.67	15.9	16.91	13.78	15.74	16.13	12.77	13.84	15.52	16.72	13.59	13.25	15.84	16.06	13.44
1.25415	0.32671	0.198676	0.71858	0.937161	540.337	305.5	17.13	16.96	14.91	16.92	17.26	17.32	17.2	16.89	17.07	14.38	17.51	15.03	17.37	18.03	17.39	15.68	15.25	14.86	16.56	16.99	17.33	15.33	16.75	17.28	16.97	15.84	16.47	17.46	16.62	15.79	16.95	15.21	16.97	16.98	17.02	15.51	16.72	16.88	15.36	16.6	17.25	17.24	17.88
0.791869	-0.336667	0.078507	0.591445	0.936959	616.462	578.9	17.81	16.31	16.86	16.51	14.24	15.82	16.12	14.23	14.34	17.53	16.56	14.6	16.7	17.71	16.66	16.65	14.89	17.46	14.45	16.73	14.62	17.19	16.75	17.14	17.51	16.37	16.06	16.76	15.77	16.34	17.11	16.42	17.1	16.36	16.61	16.8	16.24	16.65	15.05	16.72	16.67	16.54	17.49
0.668296	-0.581441	0.875188	0.981066	0.936497	1735.67	417.7	16.28	19.76	21.64	20.48	17.2	20.79	15.92	20.26	20.68	18.19	19.25	16.18	20.23	20.12	16.3	19.17	19.76	21.04	19.76	20.11	18.61	16.36	20.95	19.64	20.5	16	19.25	19.34	17.52	20.59	19.91	20.72	20.6	18.6	16.43	16.5	19.78	20.73	19.8	20.27	19.85	20.83	20.58
1.43815	0.524215	0.184202	0.704727	0.936404	941.098	435.9	17.25	17.62	16.83	16.27	16.43	18.64	16.89	17.96	17.61	18.34	14.23	17.13	17.67	18.03	13.96	14.79	16.75	17.01	17.28	18.18	16.81	15.45	14.34	14.05	13.9	13.86	18.08	17.1	16.89	18.12	17.28	16.61	17.44	17.83	14.06	14.82	18.01	17.9	18.6	14.2	16.63	17.44	14.64
0.800843	-0.320409	0.389948	0.822235	0.934477	709.452	461	15.18	16.36	13.95	16.39	15.87	16.08	14.99	15.91	17.87	16.15	14.3	17.78	16.18	16.35	14.05	16.71	16.74	16.08	15.97	16.23	16.03	16.32	15.66	16.79	16.08	15.29	16.17	14.4	16.27	16.19	16.03	16.02	16.36	16.72	16.78	17.91	16.15	15.75	17.69	15.75	16.31	15.02	16.87
0.628741	-0.669462	0.253311	0.779359	0.933313	550.316	430.8	18.61	19.05	20.73	19.4	18.89	15.23	14.99	19.69	15.18	20.25	18.95	20.32	20.52	19.95	15.39	19.37	15.55	20.49	19.08	20.83	16.49	19.17	19.65	18.49	20.09	19.67	19.63	14.86	20	19.76	20.05	19.97	19.78	18.83	17.67	20.04	20.42	19.74	15.67	20.6	20.04	20.8	20.3
0.787537	-0.344581	0.180112	0.703149	0.933251	727.463	445.2	18.14	14.42	14.85	16.58	14.72	17.4	17.01	16.11	18.36	17.88	15.1	16.86	17.59	17.09	18.06	17.67	15.19	16.94	17.58	17.36	17.09	16.96	17.1	17.64	17.24	15.77	16.15	17.29	16.49	17.06	17.15	18.03	15.85	17.51	17.73	17.5	17.89	16.83	17.43	17.59	17.68	17.12	17.54
0.768117	-0.380602	0.568911	0.896555	0.93321	1129.57	398.7	18.3	18.34	18.06	14.59	16.2	18.41	17.51	17.89	19.16	17.83	17.87	17	18.5	17.87	14.84	18.59	18.65	19.25	16.85	18.66	17.57	16.03	17.81	17.32	18.17	18.32	18.02	16.46	14.97	17.39	18.32	17.53	18.43	17.87	17.91	17.34	17.76	17.33	17.93	18.04	17.81	18.75	19.43
0.781631	-0.355441	0.266027	0.786816	0.932548	114.016	372.9	17.75	16.92	18	17.29	17.6	17.71	17.72	18.5	14.36	18.31	14.81	14.61	17.83	17.51	18.5	15.35	15.83	16.4	16.64	17.61	17.57	17.97	17.54	18	17.71	17.23	17.73	17.55	17.65	18.09	17.25	18.18	17.93	18.11	18.41	18.15	17.9	18.11	18.67	17.81	16.17	17.01	17.8
2.45789	1.29742	0.43007	0.83949	0.931896	354.338	531.8	17.57	15.66	17.72	16.99	15.57	16.23	15.25	17.41	15.59	16.38	8.05	7.67	18.41	16.5	17.35	16.61	7.67	14.55	7.37	17.32	15.34	16.5	16.39	8.31	15.72	15.92	7.81	17.08	7.93	15.02	8.84	17.03	16.48	6.93	16.04	16.44	14.56	18.69	15.67	16.63	16.28	17.13	17.22
1.24248	0.313226	0.110064	0.612862	0.931003	379.989	57.2	14.84	16.98	17.5	17.09	16.92	17.11	14.33	16.85	16.73	16.77	17.13	17.07	16.64	16.76	17.33	16.44	17.36	16.59	16.69	15.14	14.75	15.96	17	17.16	14.69	16.99	16.4	16.79	17.17	16.54	14.66	17.03	17.06	16.48	14.95	17.52	16.79	16.66	15.16	17.14	16.95	16.73	15.31
0.63474	-0.655763	0.622514	0.912522	0.930903	998.625	394	15.53	19.58	15.39	19.18	15.37	19.73	15.1	19.97	19.62	18.74	19.81	18.87	20.26	15.39	16.58	18.73	19.95	20.63	19.11	20.77	18.36	17.66	19.99	18.6	15.42	15.28	17.71	16.3	18.49	19.7	19.69	20.47	19.88	20.5	15.7	18.84	20.44	19.21	15.78	15.56	19.04	19.83	15.95
0.776695	-0.364581	0.359401	0.811688	0.928288	193.006	361.9	18.46	17.69	17.87	17.74	18.28	17.29	18.52	18.48	15.31	17.42	19.44	18.51	17.94	18.18	13.29	17.9	17.9	17.58	18	18.14	18.83	18.37	17.64	19.06	18.48	18.14	18.16	17.75	18.11	16.95	18.11	17.64	17.83	18.11	18.76	14.97	17.85	18.54	18.74	17.41	18.55	17.96	17.91
0.737135	-0.44	0.259542	0.783832	0.928214	133.96	583.4	14.31	15.86	17.49	15.08	16.47	17.4	13.9	13.76	15.75	17.5	16.09	14.23	16.06	17.03	16.67	16.39	14.56	17.38	17.13	17.24	14.2	17.14	16.03	16.7	17.2	16.74	15.3	17.5	15.97	13.43	16.86	16.23	16.58	16.8	16.76	15.02	13.69	17.7	17.48	16.58	16.81	16.53	17.3
1.60025	0.678301	0.643298	0.922177	0.927944	225.618	484.3	16.05	14.83	16.14	11.4	13.98	15.8	14.35	13.59	10.54	15.33	16.64	18.34	11.29	16.57	16.66	11.95	16.71	14.11	13.95	13.58	14.76	14.86	12.81	11.45	13.63	16.68	10.9	13.85	15.57	12.81	16.28	12.25	10.71	16.23	13.88	15.87	16.72	15.45	11.85	13.78	15.47	14.43	11.69
1.24309	0.313935	0.326682	0.794027	0.927127	182.033	36.3	14.93	13.46	15.39	14.03	14.07	14.16	14.82	14.39	13.18	14.07	15.68	14.42	15.63	14.28	15.32	13.21	12.53	15.01	13.97	15.36	15.62	14.99	14.05	14.7	14.59	13.95	14.01	11.77	14.59	14.3	13.66	14.99	13.72	13.92	12.21	15.05	14.68	14.09	15.36	14.59	13.5	14.43	15.86
0.730147	-0.453742	0.403569	0.82494	0.926854	783.976	423.6	19.48	19.14	15.78	20.22	15.7	20.05	19.2	20.48	20.57	20.19	19.4	19.61	20.28	20.28	16.93	19.07	15.97	20.68	19.41	20.63	19.15	19.23	20.05	19.8	20.36	19.71	19.44	19.45	19.5	20.04	20.21	20.45	20.2	19.41	18.67	19.68	20.09	20.41	19.79	20	19.28	20.68	20.38
0.803414	-0.315785	0.667622	0.929717	0.926329	194.053	361.6	14.09	15.68	15.83	15.59	16.94	16.61	15.66	16.08	17.43	15.53	16.5	16.3	17.16	16.68	16.18	16.2	17.68	15.31	16.96	16.03	17.63	16.15	17.58	17.27	16.42	16.1	15.93	16.32	16.38	13.12	17.25	15.88	15.86	15.19	16.93	16.56	17.1	16.89	16.77	16.29	15.79	16.11	17.94
1.27669	0.352409	0.632567	0.916309	0.925394	601.47	464.4	16.05	16.11	16.97	16.69	16.66	15.71	16.15	16.37	16.06	17.12	16.35	18.3	15.6	16.11	16.57	16.66	16.82	16.76	16.59	16.82	16.95	16.22	15.91	16.09	17.22	15.12	15.22	15.99	17.47	15.32	16.48	16.45	17.09	16.11	16.97	16.31	14.91	11.72	16.53	15.45	16.11	14.13	17.16
0.776729	-0.364516	0.211545	0.728905	0.924868	996.138	58.9	17.37	17.14	13.45	17.07	16.92	13.17	17.14	16.35	14.26	16.24	16.78	17.13	16.67	16.79	17.12	14.47	16.95	17.34	16.81	17.24	16.83	14.31	16.84	16.15	15.95	16.37	17.12	16.79	17.38	16.25	17.46	17.12	17.1	16.9	16.03	14.54	17.03	17.5	16.9	16.22	17.17	16.6	16.85
1.29981	0.378301	0.106573	0.612125	0.924172	412.304	321.6	15.04	16.96	17.6	17.64	18.74	17.6	14.55	17.27	17.4	17.79	17.52	17.11	17.85	17.71	17.03	17.09	16.91	16.24	17.28	15.33	17.48	18.43	17.37	17.35	14.9	17.59	17.9	17	18.03	18.04	14.9	15.19	18.28	17.11	16.26	17.69	16.43	17.31	15.34	15.11	17.33	17.28	15.52
0.804432	-0.313957	0.32064	0.794027	0.923679	350.986	238.4	15.76	18.17	17.25	19.11	15.61	15.62	16.48	18.18	17.39	18.45	18.72	18.03	18.32	17.98	18.14	16.3	17.67	15.59	18.21	18.55	17.44	17.63	18.34	17.81	18.16	17.11	18.02	17.97	18.6	18.51	17.87	18.44	18.16	17.36	18.76	16.07	18.26	18.03	18.28	17.53	18.49	18.87	17.66
0.741145	-0.432172	0.043159	0.504184	0.923664	413.305	506.2	15.3	14.21	13.05	14.51	13.45	13.66	15.24	11.52	14.04	14.65	14.51	15.08	15.96	11.17	15.94	15.35	15.36	15.94	15.24	15.54	11.33	14.87	12.79	14.05	12.74	14.02	14.42	12.5	15.71	13.74	15.59	15.24	15.17	16.26	14.88	14.95	14.43	13.3	15.29	14.04	13.8	14.06	15.99
1.57179	0.652409	0.677303	0.931796	0.922438	592.222	540.5	16.19	15.94	11.53	12.15	14.69	16.05	15.31	14.98	15.22	15.54	12.33	15.55	16.52	16.5	17.02	14.87	12.21	11.43	11.41	17.04	15	16.91	11.04	16.06	11.92	14.51	15.58	15.04	17.39	14.61	11.98	12.94	11.19	16.39	15.54	13.05	13.56	14.43	15.35	16.55	15.54	16.5	14.48
1.31059	0.390215	0.243775	0.76757	0.922209	502.37	452.7	15.46	18.26	17.31	17.75	17.61	17.87	15.02	18.12	18.47	18.8	17.63	18.3	17.89	18	17.76	18.57	17.26	17.09	17.7	15.69	15.43	18.09	17.49	16.72	15.33	18.32	16.67	18.35	16.59	18.59	15.28	17.71	17.12	17.99	15.6	19.16	17.92	17.94	15.7	18.43	18.09	18.28	15.9
0.81004	-0.303935	0.308492	0.792819	0.922194	376.995	57.6	17.58	17.23	15.49	15.44	15.44	15.44	17.35	17.98	17.41	17.08	17.98	15.55	17.29	17.24	18.07	17.09	17.4	15.42	15.43	17.26	17.34	16.88	16.81	17.89	18.58	17.12	16.73	16.82	17.27	17.37	17.67	16.57	16.99	17.51	18.35	17.63	17.98	18.19	17.98	16.99	17.21	15.14	17.22
0.76971	-0.377613	0.869802	0.981066	0.921669	271.233	508	13.1	15.04	14.66	13.21	13.79	15.78	14.24	15.46	15.67	14.67	15.28	16.05	15.43	15.2	15.53	15.53	16.69	12.18	16.1	16.14	15.22	12.45	16.27	15.68	15.05	16.32	14.96	15.76	13.1	15.89	16.75	14.94	14.21	14.39	15.96	16	16.64	16.38	15.26	15.32	14.7	14.97	15.87
0.799019	-0.323699	0.37456	0.817691	0.921354	300.935	36.9	14.31	15.5	17.43	15.52	14.96	15.58	14.49	15.08	12.47	15.12	16.09	15.07	15.1	15.82	15.84	14.81	16.47	15.15	17.54	16.39	15.06	15.64	15.49	16.42	14.77	14.6	15.5	15.05	15.13	16.15	14.31	16.55	15.64	15.35	14.46	17.09	15.93	15.06	15.62	15.1	14.63	15.54	16
1.55307	0.635118	0.48537	0.868927	0.921074	462.363	440.6	13.94	17.57	18.05	16.73	13.28	18.03	16.64	17.8	16.43	18.03	14.15	17.79	17.77	18.12	17.65	14.7	17.98	13.55	16.2	14.4	17.95	18.27	12.87	18.23	15.65	17.78	17.94	17.78	18.04	12.88	13.81	14.48	18.22	17.16	18.08	14.74	16.86	12.96	15.75	17.44	17.92	18.16	14.52
0.620677	-0.688086	0.248716	0.775269	0.920113	272.258	339.9	17.38	15.52	15.82	13.2	17.55	14.85	17.3	15.55	16.11	14.79	13.19	15.12	15.68	16.33	12.9	17.84	13.26	15.31	18.43	18.25	18.04	16.69	17.5	15.44	17.35	17.99	12.52	17.21	12.71	17.4	17.34	13.91	18.07	14.16	12.92	17.33	12.31	15.75	13.74	17.94	17.43	11.6	18.08
0.768953	-0.379032	0.181042	0.703149	0.91918	420.795	45.3	17.71	19.72	19.71	16.9	15.84	15.84	17.66	17.24	18.71	17.28	17.62	17.62	16.12	17.14	17.24	16.51	17.65	17.16	20.27	16.16	17.47	17.58	18.84	17.4	17.98	17.17	17.08	18.65	17.54	17.31	17.62	17.97	19.27	16.64	19.97	19.4	18.22	16.99	17.75	17.75	18.12	17.74	16.33
0.774706	-0.36828	0.343663	0.805512	0.91845	926.734	595	12.66	14.5	15.89	14.99	14.6	15.87	14.84	12.71	15.43	16.38	14.64	14	12.46	15.38	15.3	16.37	15.5	16.14	15.24	15.94	14.56	13.28	14.85	14.79	15.75	15.09	14.38	14.8	14.84	14.24	14.78	14.53	16.2	14.29	16.42	16.54	14.56	15.71	13.32	15.02	14.69	15.86	13.17
1.34218	0.424581	0.128238	0.65275	0.91762	626.797	47.2	14.83	16.77	17.3	16.76	17.39	17.27	18.38	16.86	18.12	15.93	16.79	18.26	18.49	18.25	16.48	16.32	18.11	18.44	17.52	15.12	14.74	17.75	17.43	17.11	14.66	18.46	17.87	17.44	19.23	17.69	17.95	16.57	17.07	17.21	14.93	15.33	16.29	16.96	15.14	14.89	17.4	17.04	15.28
0.499844	-1.00045	0.0565447	0.557881	0.916488	811.491	427.3	19.22	11.95	20.07	19.93	19.38	12.16	18.68	11.9	20.02	19.81	18.68	19.56	19.96	19.7	12.62	19.39	12.98	21.03	19.73	13.31	12.73	19.02	11.69	18.91	19.9	19.37	18.9	19.67	19.55	18.55	18.87	20.5	20.26	19.37	13.66	19.4	20.18	18.45	19.72	20.03	19.21	20.38	20.35
0.746623	-0.421548	0.13168	0.658186	0.915971	323.255	454.3	15.51	14.01	14.09	15.06	15.33	16.4	14.54	14.53	14.17	13.94	14.54	12.69	15.81	14.09	15.07	16.14	14.41	11.49	15.28	14.41	15.77	16.06	13.4	13.58	15.08	15.5	16.16	15.07	17.76	13.37	14.7	17.87	16.42	14.56	16.01	15.41	15.35	13.05	14.87	15.05	14.52	14.18	14.3
1.88269	0.912796	0.160563	0.694957	0.915889	137.045	51.1	21.95	22.26	18.5	23.56	21.89	22.6	16.46	23.28	22.34	23.77	22.93	23.21	24.18	22.46	23.56	24.08	23.48	21.44	23.98	23.79	22.88	22.04	23.07	22.11	23.54	23.4	22.07	19.84	23.98	23.77	20.5	15.71	15.51	15.29	19.04	19.61	19.17	18.85	23.48	22.54	24.65	23.84	23.73
1.77517	0.827957	0.0334846	0.46853	0.914795	577.099	510.3	9.82	15.22	16.28	15.86	14.5	15.27	9.59	15.85	14.34	16.99	15.5	15.92	15.91	14.88	16.62	15.49	16.35	15.79	15.94	10.41	9.97	10.61	14.89	17.47	9.97	10.09	14.57	15.43	16.1	15.73	16.09	10.88	15.08	13.45	15.81	10.8	15.04	15.19	11.45	12.34	15.26	14.98	17.75
0.550263	-0.861806	0.469569	0.859239	0.913971	386.253	316.2	17.36	9.28	17.06	17.08	17.62	17.08	15.32	16.55	15.46	18.09	10.43	18	16.08	10	10.25	11.93	17.33	15.35	17.46	17.13	16.56	14.74	16.36	16.28	16.67	15.95	16.77	15.75	17.43	15.74	17.2	11.23	17.11	16.3	17.23	11.12	16.23	16.9	18.16	17.15	16.08	16.93	17.93
1.78984	0.839828	0.203824	0.722593	0.913467	636.554	584.6	15.02	13.62	16.4	14.71	9.92	13.35	16.07	14.49	15.1	13.14	13.93	15.22	12.65	9.76	14.89	16.54	16.4	15.15	14.61	10.54	16.48	10.76	12.43	10.17	10.05	10.13	13.64	14.99	9.92	16.85	10.17	14.97	13.6	15.84	9.76	10.92	16.67	14.06	10.63	10.32	13.38	14.01	14.61
0.774094	-0.369419	0.594115	0.902978	0.913198	691.971	584.3	13.56	15.37	16.12	12.87	12.79	15.31	15.43	15.74	15.62	15.82	14.95	13.36	14.73	15.63	15.57	14.36	16.38	16.3	13.14	15.97	13.47	15.68	15.97	16.01	15.25	14.69	13.09	14.34	13.36	16.22	15.66	16.27	14.96	14.93	13.58	15.86	15.72	15.88	15.79	15.84	14.14	15.65	16.44
0.722858	-0.468215	0.289938	0.789603	0.912964	812.829	41.5	18.6	16.49	18.35	17.78	19.19	17.67	15.48	16.56	17.95	18.05	18.02	16.66	14.98	14.67	16.13	18.94	18.03	14.61	18.18	15.17	19.2	17.49	17.37	17.67	18.79	18.48	18.04	19.26	17.35	17.65	17.61	19.09	18.18	15.83	17.51	19.09	17.31	17.13	15.19	19.32	18.79	18.1	15.34
0.744944	-0.424796	0.593663	0.902978	0.912893	1085.66	396.7	17.87	19.02	18.23	18.05	15.64	19.54	18.09	19.34	19.5	17.11	18.35	15.92	19.17	18.64	16.3	19.09	14.98	19.93	18.45	20.23	17.72	18.22	19.45	17.74	18.88	18.75	18.14	17.7	17.79	18.98	19.88	19.82	18.83	18.31	17.74	17.81	18.76	20.04	18.55	18.65	17.26	18.83	19.13
1.23528	0.304839	0.234033	0.752671	0.912781	525.162	484.8	15.94	15.33	16.15	15.62	14.78	16.24	15.99	15.7	16.37	15.28	15.19	15.61	16.16	16.86	15.63	15.88	16.01	15.81	15.75	13.91	15.69	15.58	15.27	15.94	15.92	13.27	15.05	15.69	16.24	14.71	13.25	14.71	16.01	15.6	17.48	16.82	15.43	15.92	16.9	16.43	15.88	15.48	13.95
1.42837	0.514366	0.10296	0.610923	0.912759	538.146	510	13.21	15.38	16.57	16.74	16.35	15.59	12.69	15.95	16.62	17.36	15.98	16.27	16.51	17.74	16.82	16.9	16.96	15.74	16.44	13.67	13.04	13.76	15.78	16.94	13.05	13.02	14.42	16.51	16.96	16.22	12.99	15.51	16.11	16.71	16.71	14.03	15.29	16.57	13.85	14.18	15.82	16.23	17.55
1.9057	0.930323	0.0692863	0.574409	0.912307	544.336	395	20.44	26.79	26.79	26.79	27.61	26.79	24.73	26.79	26.79	26.23	27.61	26.23	26.45	25.86	20.5	26.45	27.61	26.79	25.67	26.45	21.44	20.44	26.79	26.45	20.26	25.13	26.79	26.45	27.61	26.06	26.79	26.79	26.79	26.23	20.53	20.41	26.79	26.79	20.22	20.22	26.06	26.79	20.22
1.30165	0.380344	0.977961	0.994266	0.911755	109.996	35.8	17.62	17.19	16.02	18.74	18.73	15.47	16.83	14.19	16.15	17.74	18.09	18.68	16.06	17.18	16.32	15.3	17.98	16.5	16.02	17.7	16.85	15.01	13.91	16.75	16.86	16.6	14.32	16.4	18.46	16.78	17.47	16.87	16.85	17	17.4	16.95	16.32	16.1	17.19	16.83	17.06	15.71	17.58
0.704981	-0.504344	0.287089	0.789603	0.911265	134.044	55.5	17.54	16.44	17.61	17.98	17.87	17.87	17.5	16.28	13.15	11.55	16.84	12.49	17.77	15.02	17.02	16.38	17.04	18.16	16.28	17.41	16.97	16.08	16.9	16.75	17.4	16.6	17.65	17.66	18.19	16.07	18.03	17.47	17.54	15.96	16.08	13.78	14.65	14.87	16.79	16.96	16.55	16.56	15.54
1.33295	0.414624	0.198502	0.71858	0.911218	264.132	351.8	16.5	16.51	17.7	14.31	17.52	17.73	16.27	16.73	18.4	16.91	18.57	18.08	18.09	17.82	17.66	17.14	17.86	15.84	17.35	14.03	18.59	17.03	17.44	14.99	15.54	17.43	17.11	16.09	17.53	18.93	17.37	17.78	17.85	17.27	17.64	17.83	15.95	13.57	18.17	15.43	16.22	16.27	17.31
1.42051	0.506409	0.506602	0.871788	0.910314	578.269	432.9	17.63	17.25	18.7	14.74	17.25	14.81	16.15	17.21	18.79	14.34	17.11	17.04	19.33	17.32	16.41	19.04	17.43	14.8	14.83	15.32	16.06	15.3	14.43	16.59	14.89	17.43	17.43	18.17	16.69	14.31	14.88	17.42	14.82	17.26	18.44	17.46	17.94	14.41	17.65	17.68	17.47	14.37	15.5
1.39449	0.479742	0.274109	0.786816	0.908714	722.698	44.4	19.01	16.63	17.47	16.78	21.47	18.8	18.88	18.37	18.31	20.13	17.43	19.98	20.27	19.19	18.26	15.11	18.28	17.24	17.29	19.31	19.44	15.61	18.51	19.82	19.34	17.74	15.53	18.46	19.84	18.02	18.93	18.66	19.1	17.43	19.92	18.26	17.7	18.39	21.15	18.85	17.76	15.58	19.51
1.89237	0.920194	0.490243	0.87101	0.908583	704.866	41.8	17.61	16.86	18.31	17.74	18.29	17.36	16.99	16.88	14.97	18.75	18.71	18.81	11.64	11.55	17.77	18.19	11.71	11.12	17.63	12.27	18.09	18.4	19.33	11.8	11.58	19.22	14.16	17.59	18.29	16.05	17.66	18.12	17.02	16.92	15.83	18.02	17.28	17.19	12.25	18.35	11.9	18.8	12.12
0.748986	-0.416989	0.315949	0.792819	0.907198	458.419	588.7	16.37	14.67	16.71	16.59	16.57	16.96	15.76	15.74	16.24	16.46	16.24	16.36	8.84	16.74	16.5	16.83	16.22	16.37	16.49	17	15.96	16.16	15.58	15.77	16.13	15.74	15.48	16.26	15.51	16.07	15.83	16.86	16.13	16	16.79	17.27	16.29	15.69	16.72	17.19	15.45	15.03	17
1.3226	0.403376	0.245644	0.769751	0.907078	918.627	44.8	18.93	19.65	18.87	17.41	17	17.65	18.39	19.42	18.87	18.77	19.42	19.43	19.18	17.66	18.87	17.3	18.77	19.2	18.18	18.81	18.05	15.84	17.8	19.23	14.13	18.72	19.27	18.09	15.31	18.87	17.75	18.31	18.99	19.92	19.53	17.39	19.5	16.7	18.24	19.63	17.63	18.74	19.14
0.670251	-0.577226	0.622012	0.912224	0.906959	558.798	395.8	17.28	16.56	17.45	17.08	14.61	17.21	15.79	17.1	17.92	16.59	12.8	16.41	18.03	16.84	12.47	15.82	18.31	18.84	17.68	18.6	12.56	16.55	17.7	17.87	17.1	16.79	17.94	15.62	13.26	17.78	17.97	17.33	16.69	16.01	12.46	16.27	17.15	18.64	14.85	18.08	15.82	18.12	17.24
0.703322	-0.507742	0.313048	0.792819	0.906515	257.948	38.1	14.81	14.51	15.34	11.58	14.32	11.75	14.59	14.13	11.63	11.19	15.86	12.06	15.52	15.72	15.94	15.92	15.25	15.1	11.81	15.86	14.82	15.71	14.74	14.84	14.8	15.21	14.34	13.12	13.02	15.07	14.81	15.91	11.55	16	14.73	13.43	15.82	15.72	15.36	12.82	13.47	13.89	15.08
2.0113	1.00813	0.299108	0.792819	0.906003	644.384	310.4	17.9	16.65	14.05	18.32	16.66	20.22	18.22	18.15	17.5	17.35	20.94	10.09	18.26	16.25	16.42	18.95	11.17	9.65	14.64	16.82	17.31	20.16	16.4	17.72	16.37	18.25	18.73	16.55	10.13	17.52	16.51	19.81	16.84	20.31	17.14	16.49	15.4	15.83	17.79	16.53	9.42	16.02	20.92
0.670281	-0.577161	0.575107	0.899496	0.905846	540.245	388.9	13.17	12.25	15.85	17.57	12.05	15.73	16.42	18.18	18.08	16.36	13.22	17.17	16.01	17.17	12.94	16.25	16.48	16.46	17.06	17.66	14.53	13.7	16.48	13.93	17.28	15.62	16.53	15.87	14.89	15.88	17.83	13.94	15.35	14.88	12.95	13.96	16.3	16.71	16.71	15.76	16.61	17.33	18.13
1.5159	0.600172	0.159032	0.694957	0.905419	1576.88	418.3	17.92	18.49	19.03	18.54	16.52	18.27	17.66	18.65	18.67	19.1	17.86	18.86	18.43	13.94	17.54	18.89	18.04	18.97	18.76	14.57	17.98	18.71	18.65	18.09	14	19.6	17.83	18.03	18.36	13.14	14.01	14.64	18.64	14.55	18.02	14.89	18.82	19.02	17.88	14.28	18.44	18.9	18.09
0.791503	-0.337333	0.581437	0.902978	0.9052	1058.16	430.5	18.21	18.68	20.9	19.02	18.36	18.64	18.1	19.42	20.05	18.93	18.76	17.99	19.92	18.99	15.77	18.35	19.31	20.87	18.75	20.34	17.54	18.55	19.05	18.42	19.4	18.4	18.19	19.08	18.38	19.36	19.46	19.84	19.46	18.49	16.97	17.89	19.59	19.58	19.25	19.14	18.54	20.44	20.3
1.26161	0.335269	0.381131	0.817691	0.903127	1117.74	41.8	18.28	17.65	18.5	17.22	18.85	18.46	18.01	17.71	17.68	18.12	18.91	18.01	16	17.13	18.17	18.96	16	15.68	17.91	16.05	17.19	17.55	17.41	18.4	17.12	15.61	17.89	17.81	17.5	18.68	19.03	18.04	18.05	17.36	18.79	19.88	18.85	16.7	16.05	17.78	18.42	17.35	17.93
0.77666	-0.364645	0.502057	0.871629	0.902099	1278.71	41.9	16.86	18.97	17.72	19.3	19.19	19.2	18.1	19.77	19.23	19.84	17.98	18.91	15.56	18.63	18.78	20.33	19.81	18.72	17.99	14.83	20.49	19.86	18.89	18.86	18.88	17.96	18.99	19.11	19.72	18.09	18.4	18.19	18.54	19.24	20.02	18.23	19.05	18.59	19.51	19.6	18.22	19.5	18.39
1.3422	0.424602	0.409806	0.828214	0.9019	370.295	456.2	16.22	16.17	16.28	16.52	17.4	16.94	16.83	16.86	17.12	17.38	17.76	18.55	18.16	14.17	15.98	17.51	16.79	16.5	17.62	16	15.87	16.71	17.11	14.33	16.38	14.09	16.37	16.63	14.34	17.12	18.26	16.59	13.91	18.23	16.53	16.84	17.8	16.05	14.8	17.13	15.17	13.44	17.5
0.683163	-0.549699	0.119518	0.631559	0.901654	596.355	424.7	17.34	16.09	14.8	18.78	16.95	14.73	19.01	19.4	16.62	18.97	15.03	19.49	15.05	16.9	17.78	20	15.11	14.7	14.75	16.12	17.62	18.49	17.76	17.03	19.15	18.32	19.69	18.87	15.03	17.96	17.12	16.1	18.74	19.1	18.2	19.66	17.02	17.72	18.64	17.77	19.17	19.69	18.34
0.727745	-0.458495	0.175277	0.703149	0.900204	921.754	42.4	17.57	17.76	17.41	16.84	17.69	16.47	20.42	17.63	16.58	17.57	18.52	18.37	14.15	18.31	14.01	19.17	17.27	18.84	18.2	18.23	18.82	18.97	18.63	14.07	14.88	17.47	16.34	16.16	18.82	16.56	17.88	17.8	17.02	17.72	18.55	17.39	18.59	16.83	18.65	18.29	18.74	17.08	18.24
0.582593	-0.779441	0.482759	0.867754	0.900076	968.751	594	14.78	8.31	13.63	8.05	12.98	15.01	8.31	12.23	12.07	14.64	13.92	13.69	9.08	8.17	14.64	10.73	13.96	8.31	12.65	9.53	8.73	15.08	13.56	14.75	14.23	14.26	13.36	12.96	12.8	12.31	9.01	13.2	13.19	13.38	13.83	9.97	13.16	13.96	13.91	14.23	13.35	13.29	13.9
1.63705	0.711097	0.736031	0.945424	0.899717	1019.46	484.4	16.45	13.84	11.13	16.33	16.65	15.87	15.84	10.69	15	16.55	17.05	15.71	16.47	12.5	16.18	12.34	11.75	15.63	16.65	12.3	15.3	12.39	10.58	15.73	16.32	16.04	15.92	15.48	15.23	10.96	15.85	12.6	15.02	17.54	16.2	12.73	10.99	16.34	12.28	12.09	15.53	15.39	16.8
0.772112	-0.373118	0.561148	0.893908	0.899362	403.953	61.4	15.41	15.41	12.71	14.12	12.09	13.58	12.67	15.14	15.04	14.28	15.15	16	15.57	15.26	15.42	13.91	16.26	15.49	15.97	16.06	15.47	16.01	14.57	16.11	15	14.65	15.53	13.52	14.61	13.83	15.39	13.98	15.67	12.32	14.52	14.02	13.32	14.92	15.83	16.24	15.38	15.59	15.77
1.3738	0.458172	0.337092	0.800664	0.898675	172.152	297.9	20.5	19.23	19.51	18.82	20	18.54	18.34	19.74	19.29	16.8	18.57	17.78	18.49	19.83	18.71	16.54	16.13	19.48	18.98	19.65	20.22	16.15	19.29	18.02	15.88	18.26	18.53	20	19.59	19.03	19.52	15.92	20.09	18.28	20.63	19.99	18.04	15.6	18.37	16.01	19.49	19.85	19.11
0.796937	-0.327462	0.812202	0.969066	0.89812	1093.72	432.7	17.66	18.1	20.04	19.01	17.01	19.8	18.87	20.09	19.5	18.89	18.64	17.65	19.63	18.48	17.26	18.92	19	20.42	17.47	20.18	17.84	17.82	19.66	18.65	19.28	18.78	18.87	19.04	18.5	19	20.25	19.53	19.55	18.79	16.27	18.37	19.21	20.18	18.76	19.7	17.4	19.43	20.15
1.24894	0.32071	0.271884	0.786816	0.898109	885.796	41.2	18.28	17.8	19.38	19.07	19.2	18.45	20.11	18.02	18.44	19.53	17.98	17.84	15.63	19.6	20.45	18.77	19.04	18.87	18.56	15.75	19.44	17.58	18.8	18.81	17.78	18.05	17.92	18.49	18.96	19.73	17.98	19.03	18.16	17.93	18.6	18.8	19.19	17.42	17.74	18.17	17.86	18.94	18.74
0.459162	-1.12292	0.0814948	0.59444	0.898034	816.695	44.7	19.19	18.46	18.76	18.6	18.57	11.01	19.29	10.83	18.38	20.07	19.19	11.51	11.75	11.62	18.61	19.07	11.85	18.46	11.12	18.56	19.56	19.69	11.66	19.36	19.59	18.64	18.96	19.08	11.38	19.79	19.92	19.18	19.31	17.93	19.01	18.87	18.35	20.13	18.91	18.89	11.08	15.63	20.14
0.723904	-0.466129	0.290803	0.789603	0.897671	117.11	59.2	16.32	17.48	19.07	18.91	19.97	18.62	18.93	19.74	16.11	18.33	16.29	16.22	19.02	16.14	19.15	20.42	18.84	16.07	19.32	16.42	19.96	19.56	19.27	19.91	19.24	18.66	16	18.73	17.99	17.86	18.15	19.59	18	19.25	16.48	20.12	16.97	19.27	19.12	16.24	19.22	17.53	19.95
1.69513	0.761398	0.39771	0.823262	0.897365	473.196	389.9	17	15.78	16.27	15.45	15.8	16.11	16.77	17.42	15.92	16.15	17.73	16.26	16.99	15.41	15.94	16.15	17.54	17.41	16.12	17.02	14.95	16.54	16.58	9.59	14.81	17.16	10.09	17.13	17.04	16.7	16.11	17.87	16.31	19.12	9.08	10.43	16.8	16.12	10.28	15.97	16.86	15.73	15.62
0.793985	-0.332817	0.0957605	0.61062	0.896891	647.42	315.4	17.03	17.57	17.59	18.16	16.8	18.29	18.02	17.01	14.78	17.33	15.15	17.46	17.56	17.42	15.02	18.1	17.08	17.58	16.95	17.97	17.45	18.71	17.59	15.02	17.38	18.8	17.75	16.85	17.61	17.46	16.93	17.83	16.93	19.34	16.29	17.5	17.1	16.23	15.35	16.97	17.9	16.96	17.78
0.6647	-0.589226	0.37561	0.817691	0.895708	269.028	50.3	15.66	16.22	15.96	15.44	14.67	15.89	13.97	14.91	16.19	11.16	15.5	11.27	15.32	15.51	16.79	16.88	11.45	10.9	16.47	17.01	15.29	15.81	15.31	17.2	15.84	15.97	15.72	16.43	18.79	15.73	15.63	15.57	15.84	16.43	16.89	15.83	16.54	16.18	15.55	15.9	15.26	16.17	16.6
0.668117	-0.581828	0.525554	0.873038	0.895284	857.789	41.9	15.54	17.87	16.04	13.23	13.3	18.44	16.75	16.9	17.51	12.94	17.55	17.47	17.71	17.79	17.16	17.61	14.09	17.05	13.55	16.99	17.59	18.18	19.86	13.93	16.76	17.76	17.12	17.97	14.92	17.21	16.21	19.11	16.49	16.62	18.69	18.64	17.67	18.38	16.52	18.37	19	16.22	17.9
2.49439	1.31869	0.464373	0.856686	0.895278	427.718	437.4	14.35	8.17	18.8	16.73	7.81	8.17	9.35	17.81	18.11	18.61	14.54	17.22	17.55	16.62	16.95	9.59	8.63	12.66	14.66	16.02	8.63	9.71	7.81	18.61	8.92	13.75	8.52	16.41	8.42	17.98	13.1	9.82	15.85	16.93	16.64	9.76	17.45	17.51	9.42	15.89	16.07	16.99	17.08
0.535903	-0.899957	0.0589154	0.561354	0.895099	782.708	46.6	17.86	15.09	16.42	17.22	11.68	11.05	17.32	10.99	10.96	18.35	16.93	18.57	11.85	17.93	18.65	19.47	16.48	17.96	11.16	16.77	16.51	16.62	16.46	17.87	17.87	16.79	18.41	17.59	11.47	16.71	17.36	16.69	11.04	18.11	17.08	17.46	16.6	10.63	18.47	17.38	11.19	15.62	17.28
1.65082	0.723183	0.455142	0.851429	0.894913	488.296	315.1	15.62	19.49	18.04	19.63	19.5	19.16	15.19	16.4	19.35	17.8	21.09	21.55	19.48	15.47	22.41	17.43	18.58	19.55	20.21	15.84	15.61	18.34	15.12	19.46	15.5	20.85	20.39	19.79	15.68	19.77	18.9	21.56	20.08	21.07	15.79	18.77	15.24	15.11	15.85	15.64	19.63	17.9	16.02
0.697954	-0.518796	0.308936	0.792819	0.894663	351.249	476	15.83	16.42	14.86	15.55	15.99	15.96	11.57	15.82	11.36	10.9	15	16.03	15.9	15.56	16.56	16.15	15.55	15.85	16.36	12.77	16.13	16.68	15.81	16.46	15.21	15.16	15.58	14.95	15.76	12.16	15.54	13.08	15.29	14.93	15.97	17.18	16.75	15.53	12.86	15.8	15.91	15.88	12.75
1.43233	0.518366	0.511235	0.871788	0.894647	508.234	347.7	18.17	16.92	17.27	12.76	15.35	17.38	15.95	16.95	17.1	16.45	17.67	18.42	16.92	17.61	18.87	16.26	17.37	16.63	16.52	14.05	17.99	18.23	12.33	16.82	13.39	17.83	17.13	17.01	15.09	18.21	15.81	16.66	17.05	18.08	17.05	16.93	15.9	12.48	17.85	14.6	15.83	16.73	17.07
1.50617	0.590882	0.471309	0.859977	0.894555	176.952	573	20.06	14.8	15.2	19.04	17.82	19.55	19.68	18.38	17.92	18.72	19.68	19.75	16.4	15.19	20.47	15.9	15.48	17.23	15.16	19.63	19.61	19.26	17.74	19.54	18.67	18.33	18.18	18.31	16.61	14.7	17.36	17.61	19.55	18.31	18.59	15.71	14.94	18.42	19.53	15.38	18.98	18.41	18.23
0.712768	-0.488495	0.272413	0.786816	0.893257	653.138	52.2	15.49	17.31	16.8	15	16.23	12.15	16	16.48	11.91	11.43	17.17	15.72	15.16	16.66	16.54	15.74	16.89	16.76	15.17	17.31	15.7	17.03	15.67	15.78	15.32	16.26	16.35	15.99	17.24	15.12	17.27	13.64	14.75	17.05	14.36	13.73	15.85	16.82	16.48	13.11	16.68	15.52	14.25
0.694136	-0.52671	0.179476	0.703149	0.893184	252.268	346.6	15.68	11.55	16.82	15.94	14.37	14.74	12.8	14.88	11.58	16.09	15.2	15.2	15.47	12.12	12.24	14.93	14.76	14.27	16.01	15.7	15.89	15.74	15.17	12.41	13.95	16.04	14.25	14.52	16.52	15.22	15.58	15.89	15.6	15	12.2	15.23	11.68	11.16	15.52	16.81	14.05	12.66	16.96
0.597456	-0.743097	0.678012	0.931796	0.889971	525.294	420.5	15.19	20.1	20.88	20.27	19.98	20.17	14.7	20.49	20.26	20.5	20.08	15.14	20.36	15.01	16.23	19.55	20.78	20.47	20.09	15.45	15.13	19.2	20.35	20.24	20.76	14.92	20.05	20.15	20.35	20.49	15.02	20.93	20.34	20.27	20.33	20.13	20.51	20.49	20.76	20.65	20.21	20.55	15.66
0.769848	-0.377355	0.516923	0.871788	0.889598	177.061	40.9	16.72	16.11	16.32	16.27	15.65	16.17	12.88	17.22	16.5	15.16	16.58	16.35	16.35	12.32	15.68	17.38	16.56	16.18	16.2	16.72	15.97	15.42	15.35	16.15	16.71	16.71	14.55	15.68	17.2	16.45	16.61	17.22	15.84	15.32	12.32	16.06	16.86	15.63	17.02	17.23	14.86	16.55	16.43
0.754072	-0.407226	0.376246	0.817691	0.888348	204.989	37.5	14.77	13.21	14.78	14.52	14.55	14.97	16.58	16.57	12.37	13.97	14.98	12.79	16.7	12.88	14.7	13.9	15.19	15.77	16.37	15.72	15.54	14.92	14.58	15.19	15.05	16.48	16.73	13.51	15.13	14.85	14.41	13.98	14.05	14.87	15.46	15.2	14.97	16.72	15.07	13.43	12.35	13.17	14.8
1.37165	0.455914	0.291631	0.789764	0.887697	556.772	45.7	17.76	18.09	14.75	17.76	19.86	20	17.44	15.59	18.07	17.35	16.69	19.79	16.56	19.73	19.56	15.5	19.04	17.58	18.25	17.55	14.8	17.43	17.9	17.64	17.79	18.52	17.5	18.75	17.98	19.24	17	18.43	17.58	17.97	18.96	16.67	18	18.01	18.3	17.64	14.66	17.96	15.37
0.601136	-0.734237	0.480863	0.867754	0.886822	387.162	485.5	13.78	13.98	7.93	15.35	15.61	15.29	15.05	14.1	14.77	15.87	14.86	15.56	15.3	7.81	9.92	16.28	15.14	15.43	14.23	14.13	16.12	15.73	14.71	14.94	14.84	15.79	15.78	16.16	15.05	13.82	14.9	10.09	14.4	14.43	11.53	9.35	14.34	15.48	15.12	9.08	14.26	14.57	16.67
0.705633	-0.503011	0.511535	0.871788	0.885451	744.769	41.8	18.23	17.59	16.89	17.5	17.18	17.31	13.98	18.75	15.4	17.73	16.73	19.31	18.47	14.44	17.84	17.15	17.19	18.67	18.86	17.02	18.55	19.66	17.95	19.01	15.78	16.21	19.01	12.01	19.14	18.22	16.9	16.65	18.53	17.19	16.93	17.8	16.23	17.03	16.96	18.48	19.06	20.3	18.28
0.723085	-0.467763	0.213704	0.734554	0.884781	158.117	52.4	18.68	18.45	19.9	17.59	14.82	17.68	17.8	14.67	18.76	14.38	18.72	15.02	18.18	18.59	18.65	15.67	16.17	17.92	14.88	18.34	18.28	18.51	17.98	18.53	18.77	18.3	18.67	17.9	15.15	18.08	18.81	15.2	18.73	18.46	18.27	18.41	18.26	17.91	18.47	18.55	19.22	18.05	18.09
1.27877	0.354753	0.187929	0.707381	0.884425	639.44	519.4	13.65	15.9	15.86	15.48	14.12	15.58	16.77	15.82	16.37	16.48	16.9	17.04	14.67	16.03	17.49	17.36	16.85	15.36	15.23	14.21	13.55	16.87	15.88	16.95	16.83	16	16.09	15.59	15.82	15.53	15.95	16.15	15.81	15.79	13.68	14.5	16.28	16.46	14.32	13.88	16.69	14.76	14.27
1.6475	0.72028	0.489134	0.87101	0.883496	336.324	479.1	18.4	16.39	18.43	17.7	16.79	17.99	17.2	18.19	16.9	17.34	11.8	14.93	19.81	16.13	19.08	16.66	10.35	14.58	15.78	18.81	16.78	16.44	16.38	15.08	15	16.52	10	18.22	15.36	16.99	14.86	18.21	18.39	14.98	17.83	15.56	13.03	20.27	17	17.53	18.41	18.07	18.07
1.30132	0.379978	0.322929	0.794027	0.883478	235.154	290.3	18.01	17.86	14.79	17.34	18.16	17.67	18.23	17.6	17.65	17.56	17.36	17.59	17.73	17.77	15.97	15.54	15.1	17.91	18.11	18	14.86	15.21	18.06	18.15	14.79	17.49	17.14	17.75	18.37	15.61	17.91	17.71	17.81	17.55	18.36	17.93	14.47	17.41	17.14	15	17.73	16.99	17.89
0.759374	-0.397118	0.379565	0.817691	0.882757	943.595	545.3	15.72	16.7	16.17	15.87	13.3	14.61	13.45	16.06	15.98	15.67	14.15	15.79	16.45	16.51	16.36	14.71	16.63	15.99	13.54	17.44	15.26	16.42	16.27	16.66	13.75	16.68	15.99	16.8	16.6	12.88	15.97	15.38	16.59	16.64	13.95	16.24	15.33	17.73	16.5	14.1	17.13	15.76	17.38
1.32942	0.410796	0.268265	0.786816	0.882589	740.32	483.1	16.21	14.67	16.61	16.53	14.97	16.14	16.59	17.63	14.65	13.57	14.13	14.82	15.46	14.34	15.35	16.21	16.08	14.5	13.52	15.52	15.99	13.05	14.49	15.69	16.88	13.32	14.46	14.48	15.94	14.49	15.18	12.27	14.34	15.26	17.36	17.86	14.07	14.37	17.1	14.72	15.22	14.45	16.18
1.75434	0.810925	0.249459	0.775405	0.881334	621.272	432.9	18.3	17.12	11.88	17.98	17.57	18.08	16.25	18.81	18.81	18.75	18.43	16.8	12.27	18.1	14.03	16.67	18.74	18.24	18.25	12.93	18.06	17.11	16.92	14.99	18.41	15.98	15.79	17.8	18.62	11.43	18.64	15.64	15.61	11.75	16.71	17.08	18.62	12.21	17.87	16.3	16.75	11.01	17.95
1.35357	0.436774	0.604758	0.904319	0.881317	298.309	360.8	16.84	15.79	15.97	16.01	16.35	12.53	16.15	14.66	17.2	13.66	16.31	16.13	16.87	14.6	16.43	16.23	16.2	16.18	15.9	16.37	15.51	13.87	15.41	13.27	13.2	15.65	15.61	16.45	16.75	15.06	15.91	14.05	16.23	17.45	16.77	14.13	12.55	15.07	13.93	16.94	16.37	13.09	13.83
1.22147	0.288624	0.309399	0.792819	0.881068	309.062	541.7	16.79	14.62	16.53	17.32	17.2	15.63	16.85	16.95	16.84	16.67	17.14	16.85	16.45	16.71	16.41	16.76	17.4	16.69	15.63	14.28	16.82	16.8	17.24	16.23	16.57	17.28	16.97	16.97	16.7	15.35	14.51	14.38	16.51	16.7	17.24	16.54	15.93	16.44	17.28	13.97	15.76	16.52	15.72
1.34924	0.432151	0.41006	0.828214	0.879381	179.007	66.6	16.38	15.33	15.45	16.25	15.84	15.43	15.72	16.68	13.98	16.32	16.24	15.26	15.92	12.39	16.31	13.41	16.3	16.76	15.99	15.95	14.81	13.18	14.96	16.23	16.62	16.09	12.12	15.42	15.71	16.18	16	15.24	13.23	14.7	15.47	16.57	16.02	16.31	15.8	15	11.81	14.56	14.03
0.688038	-0.539441	0.516843	0.871788	0.878981	608.254	302.8	13.12	16.44	16.35	15.98	17.52	13.63	15.71	16.62	16.59	11.81	15.65	12.7	12.93	15.48	15.78	15.45	16.87	14.5	14.74	15.15	16.16	17.5	15.89	17.24	15.75	15.76	18.73	18.15	12.7	16.08	15.62	13.91	15.18	15.19	16.44	13.95	16.57	16.17	16.93	15.85	13.24	16.38	13.57
1.23884	0.308989	0.3129	0.792819	0.878458	396.743	47.4	17.51	17.14	16.65	17.23	16.99	16.6	17.43	18.58	17.69	16.87	17.78	16.42	19.01	18.02	17.66	15.42	16.79	17.29	16.22	17.12	17.26	17.53	16.03	17.92	17.3	17.41	16.74	19.11	19.1	16.54	17.43	15.75	15.98	16.52	18.3	16.35	17.83	17.1	17.8	17.6	14.51	17.69	18.58
1.24831	0.319978	0.383503	0.818486	0.878406	101.059	300.9	18.73	18.99	17.8	17.73	16.43	18.56	19.28	19.07	18.65	18.37	19.21	18.61	18.53	18.96	19.17	19.52	18.53	18.27	18.56	18.62	19.32	19.81	18.06	19.19	19.02	18.8	18.44	18.29	16.64	17.74	16.32	16.34	17.32	18.99	18.66	19.11	17.97	18.69	18.8	18.43	16.43	18.46	18.1
1.33241	0.414043	0.313562	0.792819	0.877125	217.104	46.4	18.53	18.45	19.07	18.51	18.22	18.38	17.5	19.57	18.87	18.44	20.39	17.63	16.35	19.37	18.45	15.44	18.42	17.5	18.59	16.98	18.41	18.69	17.08	15.81	16.48	17.49	16.61	17.45	18.28	19.15	18.09	16.59	17.65	20.87	19.42	19.35	20.96	19.77	20.02	19.97	18.06	17.04	18.14
1.58206	0.661806	0.278279	0.789317	0.877009	368.226	265.7	17.3	16.42	12.09	17.38	17.28	17.52	16.9	16.83	17.56	16.23	16.97	12.17	16.81	12.42	18.01	17.03	12.8	12.04	16.32	15.85	12.44	13.2	16.68	17.33	16.93	12.5	16.8	16.71	13.18	16.33	16.96	17.24	16.34	14.49	17.27	16.55	16.74	16.8	17.76	12.95	17.46	16.68	13.13
1.70644	0.770989	0.456292	0.851429	0.876938	186.185	229.2	15.35	16.78	11.25	15.48	17.58	11.1	15.32	11.01	16.22	15.62	17.01	13.58	17.44	15.81	16.66	16.97	16.65	16.89	17.04	12.48	13.4	12.56	10.8	16.06	12.73	13.91	11.36	16.31	11.51	16.75	16.26	12.81	15.5	16.91	14.84	12.88	11.1	17.09	12.47	16.2	11.22	10.38	17.61
0.534658	-0.903312	0.167166	0.694957	0.876185	470.288	336	17.85	11.64	16.63	11.6	11.4	19.19	18.32	11.64	19.27	16.09	18.92	18.59	12.33	17.22	12.37	17.65	17.3	12.87	17.61	17.47	20.35	18.29	11.45	12.52	16.44	17.75	17.39	17.47	12.15	11.6	17.8	18.22	15.12	18.21	18.21	17.3	16.95	16.45	18.41	16.9	17.35	17.36	18.73
1.31235	0.392151	0.351436	0.808303	0.875886	970.72	43.6	19.8	18.54	19.42	19.25	20.12	19.24	15.83	19.43	19.39	20.56	18.54	20.85	20.09	19.86	18.83	20.63	18.21	18.23	19.49	18.1	18.72	19.49	19.74	17.43	19.33	18.8	19.22	19.69	20.12	19.15	17.02	19.83	20.2	20.14	16.37	19.13	18.78	18.56	16.35	16.14	19.83	18.86	19.82
1.85298	0.889849	0.321046	0.794027	0.87556	261.13	50.1	17.02	19.15	18.35	18.03	15.64	16.43	14.29	19.06	19.04	18.56	18.68	13.61	16.98	18.14	13.75	14.6	13.99	17.31	17.55	15.71	13.73	19.51	12.72	13.83	13.68	13.7	13.41	12.55	16.6	14.76	13.7	14.42	17.7	22.99	16.46	19.45	19.35	21.3	18.37	18.78	13.14	12.64	19.63
1.52253	0.606473	0.501018	0.871629	0.874783	252.623	346.8	15.42	12.61	15.34	11.12	15.33	11.38	15.04	13.04	16.65	11.78	15.69	17.02	14.5	14.27	17.42	12.93	14.21	14.49	11.47	12.64	14.73	15.62	11.1	17.58	11.97	15.55	15.11	13.37	11.78	15.82	15.24	12.96	14.42	15.49	15.43	13.08	11.36	10.83	15.81	12.4	11.41	13.98	15.28
0.601728	-0.732817	0.257672	0.782513	0.874352	1101.76	42	18.3	18.26	18.19	13.02	18.77	20.2	18.32	16.7	13.18	12.73	13.95	13.49	13.73	16.36	13.64	19.5	13.88	13.32	17.55	15.86	16.96	19.47	12.57	13.74	16.7	18.37	18.11	17.86	17.19	17.18	16.47	17.79	16.43	12.88	19.06	18.59	17.6	14.86	18.73	17.35	12.99	17.17	17.96
1.30688	0.386129	0.462846	0.855676	0.873635	229.631	579	14.43	15.07	15.21	13.25	14.18	13.49	16.07	14.89	15.23	15.99	12.88	15.75	13.89	15.7	15.52	12.49	15.82	12.96	14.04	16.22	15.23	16.24	14.97	14.97	14.11	14.39	15.58	12.48	14.38	12.99	14.97	15.2	13.75	15.02	14.36	15.55	15.03	13.8	15.79	15.46	13.69	12.24	12.22
0.775584	-0.366645	0.573845	0.899213	0.873344	943.228	53.4	17.31	17.35	14.28	17.19	17.69	18.54	17.23	17.33	14.01	13.56	17.44	17.82	17.79	17.61	17.66	18.04	18.2	18.46	16.67	18.3	16.7	16.42	17.81	16.63	17.34	17.44	18.22	17.51	18.47	17	17.96	17.42	16.48	17.13	15.56	15.09	16.61	17.61	16.63	15.96	17.93	16.97	16.97
1.33367	0.415398	0.237521	0.75912	0.872086	380.226	260.1	15.7	17.54	13.03	12.53	16.26	16.73	15.48	16.42	15.46	16.33	16.22	14.1	16.84	13.18	16.04	14.13	13.54	12.83	15.28	16.92	15.49	15.36	15.62	16.39	16.43	13.25	14.86	15	15.69	15.36	16.79	14.13	15.42	16.66	14.62	14.23	16.21	15.99	16.05	13.66	14.81	15.26	13.94
0.772883	-0.371677	0.124142	0.643725	0.87158	220.116	464	14.21	13.7	14.96	13.64	12.78	10.32	13.49	13.62	12.63	14.49	14.25	16.99	14.08	14.03	13.78	14.94	14.57	13.33	16.3	14.88	13.8	15.22	13.31	14.67	13.16	14.8	13.99	13.55	13.51	13.38	12.02	15.62	13.8	12.79	14.74	15.22	14.61	13.38	14.67	14.28	14.22	12.37	15.44
1.62802	0.703118	0.671958	0.930005	0.871369	281.247	428.4	18.6	17.58	17.71	19.1	20.04	14.32	20.45	17.02	18.53	19.31	16.61	19.62	18.11	17.46	17.89	18.63	16.36	19.79	11.23	12.53	18.66	17.94	19.65	11.98	19.11	18.58	19.93	19.77	19.11	15.78	12.76	18.19	19.56	17.91	17.42	18.13	17.88	15.92	17.8	16.62	17.27	19.66	18.07
0.745933	-0.422882	0.424012	0.838076	0.870306	191.962	573.4	18.37	13.86	14.41	16.83	15.97	14.18	16.84	17.55	17.39	13.68	17.01	17.37	17.91	17.16	14.48	16.08	14.74	16.89	16.45	16.43	17.42	17.27	16.15	17.88	16.87	16.82	17.07	16.18	17.45	18.49	16.96	14.91	16.95	15.77	18.22	17.27	17.04	17.34	14.91	14.67	17.76	17.16	18.15
1.3672	0.451226	0.899374	0.984982	0.870288	1049.75	42.2	17.5	18.08	18.26	18.02	18.64	18.18	18.15	15.23	16.87	19.07	17.9	17.17	17.94	18.88	19.48	19.19	19.19	14.25	14.29	18.47	18.86	19.06	17.42	14.52	16.83	17.13	17.65	17.94	17.5	18.75	17.91	16	16.98	16.72	17.43	18.73	18.75	13.79	18.51	18.38	18.67	17.08	17.54
1.55154	0.633699	0.303275	0.792819	0.869589	230.036	256.3	12.61	10.88	11.05	13.6	15.88	16.9	14.68	15.41	15.33	12.05	16.18	13.28	15.02	11.51	14.94	12.24	11.66	14.66	15.32	12.21	14.79	12.28	10.41	11.77	15.57	11.63	15.95	9.86	16.23	10.8	15.73	12.51	10.83	15.15	11.47	12.66	12.61	14.07	15.28	15.75	12.56	12.77	14.37
1.39346	0.478667	0.66891	0.929717	0.868995	382.766	47.7	16.65	16.71	16.77	18.36	17.19	14.29	19.38	15.62	16.97	15.43	17.75	20.12	14.7	14.42	19.87	15.28	16.77	15.86	14.39	14.97	15.6	16.04	16.79	14.59	15.68	15.91	16.98	17.43	14.63	16.74	15.85	19.29	17.55	17.1	18.06	16.69	17.73	17.21	16.47	17.16	18.75	16.68	15.13
0.712758	-0.488516	0.270196	0.786816	0.868265	948.372	292.4	16.45	18.38	14.19	17.56	13.87	16.29	18.81	16	16.07	15.57	18.01	18.7	19.05	18.17	17.22	20.14	18.09	19.38	17.19	19.3	17.83	18.72	16.89	16.97	17.09	18.92	17.92	17.91	16.53	17.75	17.29	19.62	16.22	16.8	17.82	16.96	18.23	17.62	18.31	17.97	13.9	17.27	14.89
1.45753	0.543527	0.0781085	0.591445	0.867806	174.011	68.6	16.35	19.98	19.03	19.93	19.56	19.61	15.98	18.98	18.83	19.01	19.84	19.53	20.25	16.18	19.68	17.6	20.37	19.96	20.04	16.45	16.38	16.44	20.07	19.37	16.18	16.07	20.04	19.42	19.65	19.68	16.11	16.17	19.36	19.79	16.5	16.54	19.47	19.93	16.45	16.26	20.22	19.91	16.59
1.56056	0.642065	0.327849	0.794027	0.867535	350.216	328.6	17.84	12.18	17.43	14.38	15.71	16.17	16.97	16.88	12.21	15.64	17.04	14.39	16.23	17.54	12.85	16.87	14.79	12.41	13.45	15.77	12.91	16.17	16.39	13.03	17	12.89	17.28	16.39	15.89	17.12	12.89	15.98	12.1	12.27	12.87	13.92	18.34	11.77	13.68	13.31	16.57	15.69	17.22
0.784771	-0.349656	0.42429	0.838076	0.867282	646.807	46	18.3	18.95	16.88	17.8	18.6	19.03	16.98	18.31	16.31	16.04	15.45	15.33	17.09	17.86	17.93	17.16	15.52	18.53	18.42	18.18	19.13	17.63	17.67	16.39	18.39	17.54	17.96	18.39	18.84	16.84	18.39	18.46	18.71	18.62	17.01	15.76	17.57	18.28	17.72	17.09	17.02	17.68	19.1
1.8937	0.921204	0.599678	0.904319	0.867092	715.329	509.9	16.72	11.17	7.67	15.41	11.72	11.64	13.91	10.21	11.38	15.11	16.6	14.53	13.03	13.96	17.6	8.63	7.93	13.28	7.67	8.73	14.46	15.62	13.98	11.58	14.64	14.79	14.43	12.49	13.58	15.09	7.81	9.08	12.37	8.42	15.98	9.08	12.42	12.79	15.73	14.4	12.29	13.93	8.52
1.80237	0.849892	0.25057	0.775621	0.86457	255.084	459.6	17.06	16.43	16.32	16.97	16.48	17.03	19.52	16.27	17.58	16.84	11.78	11.31	17.18	11.34	20.24	18.12	17.21	17.67	10.94	17.49	11.45	16.57	17.03	17.9	11.36	16.83	15.37	15.63	11.12	16.33	17.65	16.3	16.88	16.59	11.25	17.16	15.78	16.7	17.33	11.85	10.83	17.49	16.57
1.33895	0.421097	0.203161	0.722593	0.864186	1242.67	42.5	18.15	18.41	18.95	17.88	18.5	19.12	18.6	19.28	18.51	19.02	18.13	19.65	19.75	17.36	15.5	18.93	15.62	18.27	19.1	15.72	19.9	19.74	18.78	18.25	18.37	16.23	19.17	19.13	19.09	16.92	18.83	18.15	16.95	17.42	15.66	15.85	15.11	18.42	16.63	19.05	19.03	19.38	19.41
0.80811	-0.307376	0.325048	0.794027	0.863874	710.539	519.5	12.76	15.07	15	15.1	14.96	15.34	13.67	14.4	15.55	14.14	15.13	15.17	15.13	14.15	15.85	16.41	14.86	15.26	14.69	16.05	15.04	16.72	14.63	13.81	15.97	13.4	15.27	14.66	16.04	14.75	15.58	13.59	14.98	13.61	16.39	13.67	14.98	15.06	16.9	16.03	15.27	14.38	13.25
1.60565	0.683161	0.496496	0.87101	0.863567	979.794	41.1	17.25	15.65	16.68	19.94	18.27	18.85	18.58	17.05	18.15	17.8	15.67	17.58	17.43	14.8	18.47	18.99	15.05	15.74	11.08	12.35	18.09	18.61	16.75	18.32	18.23	17.33	17.11	17.8	16.64	17.12	18.73	19.2	17.65	18.05	17.78	18.18	17.62	17.78	17.13	18.51	12.04	18.04	12.18
1.452	0.538043	0.508423	0.871788	0.862769	453.329	348	15.4	13.93	14.48	11.8	13.72	15.16	14.23	13.63	14.29	11.34	17.98	16.67	14.23	15.08	17.05	16.02	14.37	14	14.22	13.22	16.4	14.15	11.63	12.69	12.63	15.68	14.68	14.11	12.36	16.72	14.75	13.53	16.21	17.91	14.77	13.62	11.99	11.4	13.36	13.02	11.98	14.09	13.22
1.7133	0.776774	0.167528	0.694957	0.862317	119.035	51.1	16.41	16.6	13.27	18.44	13.98	17.81	13.05	18.46	17.11	18.62	17.38	18.2	19.05	13.38	17.99	18.48	18.19	16.99	18.97	18.75	13.41	16.38	17.81	16.89	17.4	17.51	16.23	12.15	18.59	18.74	13.41	14.23	12.89	12.71	13.5	14.39	12.95	12.52	18.32	13.79	19.08	18.57	18.92
0.769011	-0.378925	0.241442	0.764442	0.862271	996.726	42.5	19.98	16.38	18.74	19.37	20.14	19.38	14.92	19.28	19.65	19.24	17.17	15.32	19.17	18.92	19.44	20.14	18.45	17.74	18.77	18.62	19.43	19.48	18.61	19.1	18.3	17.92	19.26	18.82	20.2	18.66	18.98	19.76	19.01	19.39	18.83	19.44	18.89	15.97	17.28	19.03	19.45	18.49	18.95
1.34414	0.426688	0.42219	0.838076	0.86144	808.525	586.3	17.8	15.4	17.16	15.58	16.4	16.25	16.98	16.3	13.86	17.67	14.46	17.27	16.14	17.11	14.28	16.17	17.49	16.39	16.53	16.53	17.03	17.17	17.08	14.29	16.63	16.8	16.97	16.07	17.32	13.39	14.15	14.76	16.65	13.56	14.38	15.01	13.67	13.44	14.76	14.46	16.9	17.1	15.76
1.36573	0.449677	0.168339	0.696199	0.861076	481.245	518.9	15.95	14.15	15.13	13.14	14.52	15.58	14.13	12.91	14.17	13.47	13.85	14.25	14.54	16.81	14.45	14.94	15.18	11.69	13.91	12.83	16.62	16.03	13.98	15.25	11.16	13.82	14.58	12.79	14.61	15.52	14.18	12.13	14.49	10.9	15.68	14.86	14.54	13.7	15.64	15.16	14.45	13.36	11.58
0.809267	-0.305312	0.548319	0.884349	0.860043	771.665	592.8	14.66	16.16	14.52	15.8	17.26	16.34	17.33	16.26	17.09	16.11	16.95	15.93	14.74	16.83	17.85	16.65	16.89	17.19	17.51	17.6	17.14	16.75	16.79	17.4	14.5	16.43	16.71	17.57	16.36	17.05	16.64	14.97	15.4	17.15	14.76	17.1	16.62	17.04	17.43	17.31	16.72	16.75	15.15
1.26366	0.337613	0.336128	0.800043	0.859586	538.874	40.2	19.53	19.59	18.2	19.09	18.02	18.72	19.12	17.71	17.42	18.06	19.18	16.57	16.96	17.55	19.62	18.16	18.47	18.15	17.76	15.83	18.54	19.71	18.36	18.3	15.49	18.93	18.24	18.67	17.6	18.59	18.53	18.93	17.63	17.99	19.15	18.59	19.12	18.26	19.22	18.44	16.51	17.9	16.01
1.46612	0.552	0.277219	0.789317	0.858562	137.096	309.8	13.98	17.88	15.96	18.36	18.43	18.44	18.21	13.32	17.42	18.22	17.32	18.39	18.26	18.5	17.74	16.78	14.13	18	18.72	16.86	17.3	14.49	17.79	17.25	13.79	13.8	18.14	16.7	18.5	17.98	13.84	14.51	17.42	18.45	18.17	17.93	14.43	17.74	17.6	17.55	13.33	18.13	18.2
1.59789	0.676172	0.16146	0.694957	0.858243	243.922	33	16.35	15.13	17.69	11.45	15.03	11.66	16.59	17.51	15	12.18	15.14	11.97	17.78	17.85	13.39	14.93	17.2	15.87	11.71	15.34	14.47	13.07	14.36	12.44	13.82	15.43	11.9	11.8	14.51	17.23	16.1	13.25	11.43	11.77	16.8	13.34	15.77	15.86	15.34	12.73	11.64	11.08	17.87
0.741145	-0.432172	0.469513	0.859239	0.857971	270.279	540	16.33	12.34	18.84	14.33	16.87	16.78	17.4	15.28	16	17.73	15.67	16.64	16.57	15.43	14.13	16.95	16.84	19.21	15.39	15.84	18.64	17.16	18.71	14.45	16.81	16.4	16.47	16.4	16.33	16.11	15.62	18.48	16.08	15.86	15.87	14.82	14.87	17.11	16	15.16	15.85	16.4	16.16
0.681515	-0.553183	0.368283	0.811688	0.857484	1134.61	432	17.69	18.06	13.93	17.85	13.48	16.88	17.46	18.49	13.61	18.75	14.28	13.86	18.92	17.56	17	15.64	14.28	13.71	17.03	18.23	16.65	14.56	17.59	18.57	18.51	18.46	17.33	17.41	16.34	18.68	17.44	17.85	18.13	17.46	17.25	17.06	16.94	18.75	17.47	18.17	17.84	18.46	17.72
0.637603	-0.649269	0.877184	0.981066	0.855791	513.335	376.2	13.19	18.55	12.67	17.5	16.82	18.59	17.22	19.4	19.75	17.4	13.27	18.73	17.65	17.88	12.97	17.91	19.32	19.17	17.6	20.48	17.1	16.94	18.33	18.14	17.67	18.08	17.49	17.05	16.78	18.75	19.48	18.79	18.34	14.85	12.98	13.99	18.39	19.56	13.8	17.52	17.71	17.85	14.57
0.739258	-0.435849	0.383653	0.818486	0.855417	901.813	41.2	19.6	19.06	19.05	18.99	18.48	17.09	18.93	19.18	18.84	19.02	13.74	14.34	17.79	19.48	18.94	19.67	17.57	17.38	18.59	19.24	19.18	18.3	20.87	19.25	18.92	19.46	17.63	16.75	18.4	18.41	16.91	18.58	19.48	16.64	20.59	19.43	19.42	17.79	19.61	18.95	16.47	18.11	18.51
0.77985	-0.358731	0.438588	0.842547	0.854943	123.092	586.7	18.85	18.36	17.77	18.5	18.54	18.46	19.14	18.79	15.99	15.77	18.12	18.61	18.18	16.02	16.19	17.48	18.06	18.23	18.55	19.2	18.96	19.12	18.67	16.14	18.08	18.78	18.3	15.69	19.36	18.72	19.5	18.62	18.67	17.65	18.85	16.42	18.77	18.4	18.48	19.16	16.06	15.73	18.69
0.587993	-0.766129	0.19983	0.719287	0.854086	886.548	47.1	13.47	17.96	16.87	17.93	17.5	12.85	19.05	18.64	13.94	17.38	15.23	19.43	13.39	18.29	16.47	14.24	16.46	19.47	20.02	17.9	18.78	19.13	19.91	19.48	19.78	18.27	12.91	11.92	17.52	18.86	18.3	14.19	18.36	19.71	18.87	20.14	17.75	12.39	18.45	17.73	18.21	14.87	14.05
1.36433	0.448194	0.36474	0.811688	0.852392	142.938	211.6	13.7	16.51	14.73	15.65	17.13	16.41	13.18	15.78	17.01	16.43	14.82	16.78	16.82	13.52	16.64	15.38	17.06	13.27	17.51	14.23	13.6	16.45	12.47	16.19	13.56	16.29	16.08	12.38	16.89	15.54	14.46	14.34	16.84	15.9	16.97	14.53	16.76	15.47	14.34	13.92	16.48	16.51	14.33
0.785942	-0.347505	0.205642	0.722593	0.8505	385.965	62.5	16.52	16.86	13.99	16.43	16.64	13.64	14.85	13.56	16.04	16.39	16.42	13.97	17.54	16.77	16.44	17.52	14.38	16.45	16.5	16.97	15.02	16.37	16.45	16.93	16.66	16.67	16.1	16.75	16.58	16.27	15.81	14.64	16.05	13.31	15.45	14.89	15.62	15.04	16.29	15.87	16.82	16.39	16.97
1.77753	0.829871	0.768803	0.955745	0.850286	390.272	364	16.61	16.72	17.04	15.05	15.12	9.92	17.13	17.13	18.31	15.96	10.47	10.21	15.89	13.82	17.96	10.94	11.36	14.13	15.77	15.15	10.38	10.96	10.66	10.41	16.09	14.57	12.71	16.66	15.76	13.51	15.6	15.79	15.2	17.18	17.32	11.16	14.1	16.95	10.83	12.38	13.91	17.85	15.37
0.564428	-0.82514	0.192891	0.707381	0.850172	1097.92	577.4	14.54	13.95	9.01	13.93	13.38	6.93	14.26	13.27	15.01	7.16	15.26	13.48	12.41	13.9	7.87	9.08	16.33	15.08	8.11	15.72	14.46	14	11.58	8.63	14.56	8.47	11.6	12.21	12.63	15.13	14.13	9.53	11.95	13.09	14.96	16.47	13.39	12.24	15.94	15.17	13.99	11.49	14.64
1.50864	0.593247	0.180147	0.703149	0.846837	1239.88	473.1	13.18	16.12	18.2	16.42	16.72	18.9	15.51	16.13	12.31	14.93	17.21	14.36	16.94	16.37	12.96	13.88	16.46	16.2	16.05	13.63	16.69	13.72	17.38	16.4	12.99	13.79	17.75	15.73	16.06	18	12.96	13.95	12.28	16.83	14.89	17.13	18.11	11.91	13.78	13.36	16.15	16.87	13.63
1.82124	0.864925	0.303599	0.792819	0.846483	120.044	77.1	14.84	10.09	12.89	15.1	16.34	17.02	14.33	11.16	16.18	15.45	15.17	10.78	16.9	11.95	10.94	11.52	10.9	16.9	15.66	16.24	11.08	15.99	15.22	16.48	15.27	11.05	10.41	8.42	16.07	13.84	10.96	11.78	17.33	10.47	17.69	14.27	10.35	9.86	11.41	11.23	15.97	9.53	16.99
1.32134	0.402	0.205165	0.722593	0.846386	369.124	27.4	16.42	15.55	17.24	15.69	15.28	12.54	15.14	17.04	16.45	14.5	14.94	14.76	15.98	15.66	15.64	14.92	17.01	13.85	14.51	15.87	15.11	12.97	15.69	15.36	15.13	12.3	15.74	14.36	15.82	16.25	15.45	14.78	16.45	15.08	16.03	15.66	15.34	15.39	15.13	17.63	14.51	10.9	15.71
0.748328	-0.418258	0.352192	0.808303	0.846053	240.981	37.9	15.92	15.12	13.26	17.28	15.15	14.36	14.93	12.74	17.69	12.47	15.57	13.28	15.14	14.97	14.93	15.25	15.46	15.01	13.08	16.71	15.7	15.12	14.55	14.99	14.87	15.38	16.7	13.54	17.76	14.38	15.03	17.79	14.26	14.36	15.74	15.3	15.98	15.35	15.82	14.92	12.8	13.59	16.43
1.40375	0.48929	0.368559	0.811688	0.845907	693.835	42.5	18.62	18.09	16.7	18.63	16.11	18.54	17.31	18.21	18.77	17.51	16.31	15.86	16.24	17.1	19.22	18.73	18.09	18.57	14.7	15.18	14.82	15.17	14.19	17.22	16.8	15.88	16.98	17.4	14.96	18.51	19.29	18.52	19.15	19.92	18.18	17.69	18.51	16.91	17.77	18.57	14.67	18.54	15.39
0.754263	-0.40686	0.849481	0.979277	0.845721	986.667	433.9	15.52	17.36	18.85	18.1	16.71	18.35	17.26	18.26	19.59	17.61	14.63	17.79	18.17	16.65	14.46	18.75	17.88	18.86	17.94	18.26	16.62	14.92	18.42	18.18	17.01	16.98	17.68	17.24	17.1	18.28	18.03	18.22	18.05	17.85	17.8	18.01	18.14	19.42	14.9	18.28	14.16	17.59	18.59
1.8853	0.914796	0.0702118	0.574409	0.844701	1255.9	419	14.43	20.76	21.37	21.01	20.63	21.35	14.02	20.64	20.19	19.93	20.4	19.8	21.6	14.23	15.37	20.59	19.99	20.1	20.76	14.79	14.28	19.22	21.28	20.37	14.3	14.15	20.96	19.83	20.36	20.64	14.26	14.84	20.58	19.77	14.5	15.09	20.1	20.07	14.84	14.57	20.64	20.85	14.96
0.513536	-0.961462	0.543448	0.883174	0.844588	998.113	410.5	15.9	14.65	19.4	10.86	10.58	18.39	18.5	10.61	18.93	14.95	18.78	11.38	18.06	17.65	11.53	12.17	11.6	18.88	18.24	17.46	15.56	17.36	18.51	17.93	17.2	16.81	19.14	9.76	11.17	19.1	16.66	17.76	17.74	17.64	17.8	12.63	11.92	17.86	12.17	17.19	14.15	18.13	19.91
1.29361	0.371398	0.695201	0.93501	0.844395	443.332	492	17.18	17.93	17.69	18.16	17.1	17.51	17.52	17.56	17.59	17.64	17.78	20.11	19.35	19.21	18.32	18.31	17.4	18.18	18.05	18.28	18.09	17.66	17.85	17.58	17.95	16.19	17.28	18.34	17.82	14.86	18.25	17.47	19.38	19.71	18.37	18.42	18.25	14.89	18.14	17.89	19.07	14.9	15.88
1.23342	0.302667	0.391386	0.823169	0.843232	147.516	37.6	16.21	15.58	15.19	15.35	14.9	16.45	14.75	14.85	14.25	14.65	15.88	17.35	15.7	15.52	16.06	16.77	15.29	15.16	13.98	16.73	15.23	15.88	14.48	15.11	14.31	15.47	15.04	11.34	15.46	14.97	15.63	16.8	14.92	15.79	15.06	15.83	15.28	15.74	16.15	14.07	14.96	14.63	16.09
1.31108	0.390753	0.181558	0.703149	0.842573	414.97	49.5	15.87	16.37	17.45	14.85	16.62	16.44	17.64	17.98	17.93	17.88	15.96	17.19	18.09	17.57	17.66	17.65	17.19	17.54	16.94	18.13	14.01	16.53	16.79	16.07	16.53	17.11	16.83	16.29	17.15	18.02	16.45	14.67	18.17	16.2	14.22	14.92	13.52	17.31	17.94	14.33	16.76	16.87	18.18
0.439003	-1.1877	0.774235	0.957227	0.842294	144.102	47.5	10.25	18.54	16.45	19.06	16.6	18.83	20.63	21.4	23.77	8.92	19.67	20.57	11.53	20.31	21.99	17.1	22.2	16.27	19.62	18.96	21.94	11.04	17.96	18.82	20.37	21.36	18.14	20.71	19.56	21.33	18.82	11.38	23.77	10	24.11	16.92	21.13	16.98	20.02	20.01	20.53	21.96	19.5
1.27995	0.356086	0.228509	0.751022	0.84178	941.632	528	15.4	17.28	17.49	17.53	18.12	17.31	14.93	15.05	16.22	17.82	17.72	18.51	17.59	17.47	18.04	15.95	18.23	17.66	17.07	15.64	15.35	17.97	18.2	17.66	15.26	17.77	17.74	17.84	17.72	16.61	15.23	15.45	17.51	17.63	15.54	15.76	15	17.86	15.64	15.44	17.33	17.74	15.84
1.39279	0.477978	0.11316	0.61785	0.841609	1163.25	423.6	14.88	19.07	19.9	17.08	17.94	18.84	19.1	18.21	19.64	18.39	19.14	18.1	17.27	19.86	14.79	15.47	19.21	18.01	18.35	18.36	14.79	15.14	18.34	18.77	14.73	17.9	18.16	18.63	18.33	18.59	19.65	15.11	17.91	17.18	15.01	19.25	18.17	17.4	16.04	18.32	18.17	18.53	18.84
1.56543	0.646559	0.774852	0.957227	0.841422	549.427	347.4	18.05	17.15	15.32	15.87	12.99	17.3	17.88	16.61	16.07	17.14	17.78	17.66	14.43	18.99	19.71	18.85	14.96	16.69	17.71	16.98	17.8	18.2	11.34	15.28	12.32	17.42	17.8	14.81	12.96	18.54	17.21	18.71	17.02	18.56	16.39	17.17	15.43	11.13	17.5	15.4	16.87	15.55	17.09
1.91342	0.936151	0.0634675	0.567262	0.841353	297.931	510	8.17	15.26	14.51	15.34	13.33	13.92	7.81	16.01	14.28	14.74	14.98	16.73	14.81	13.17	15	16.12	16.03	14.67	15.87	9.08	8.42	9.21	14	15.4	8.73	8.31	13.32	14.07	16.88	16.13	8.31	9.42	14.58	15.05	16.43	9.47	13.96	14.18	9.82	9.15	14.61	15.41	16.51
0.758966	-0.397892	0.753026	0.94932	0.841045	493.308	368.2	13.86	16.83	14.67	16.63	16.5	16.77	17.02	17.61	18.07	17.21	17.56	16.96	18.03	16.83	13.78	17.48	17.86	17.74	16.83	14.34	15.74	15.53	18.3	16.18	17.18	16.77	17.46	16.24	16.05	16.95	17.92	17.5	16.54	17.46	16.11	17.96	18.29	17.32	17.88	17.54	16.38	18.19	14.47
1.43858	0.524645	0.337307	0.800664	0.840501	189.009	255.7	15.03	11.93	12.32	15.38	14.43	17.89	15.79	16.72	16.61	15.46	17.28	13.41	16.02	12.62	16.27	13.63	12.97	15.36	16.14	16.28	12.71	13.43	13.55	12.76	15.79	12.71	15.56	14.69	17.32	11.8	16.82	13.63	13.7	14.84	12.67	13.73	14.87	15.76	13.47	17.27	16.2	15.2	16.8
1.34214	0.424538	0.111415	0.614577	0.840247	247.091	53.6	17.85	21.06	19.5	20.51	21.16	20.28	17.58	20.01	19.32	19.09	20.56	20.92	20.89	17.72	20.71	19.73	19.87	20.77	20.74	17.8	17.89	18.8	20.51	20.29	17.69	17.55	21.3	20.51	20.88	20.51	17.68	17.49	20.09	20.49	17.95	17.9	20.39	20.54	17.73	17.71	20.94	20.48	17.85
0.638678	-0.646839	0.129015	0.65452	0.840002	253.907	363.1	17.02	17.83	11.6	16.78	16.63	11.4	17.02	16.34	13.57	16.83	12.34	11.78	17.26	17	18.47	12.94	16.61	16.45	11.49	15.01	16.54	17.31	17.08	18.06	16.79	17.48	16.02	17.92	17.19	17.71	16.47	13.89	15.32	16.68	17.6	16.96	13.74	17.07	12.72	17.62	16.85	15.78	12.58
0.749913	-0.415204	0.453383	0.850655	0.83989	995.687	417.2	20.77	20.63	16.84	21.94	20.66	21.89	20.43	21.68	21.33	20.92	20.02	20.14	21.57	21.52	18.04	21.35	16.95	22.15	20.95	21.69	20.13	20.78	21.83	20.54	22.16	20.74	20.41	20.68	20.9	21.68	21.86	22.24	21.42	20.1	19.88	20.93	21.26	21.92	21.25	21.3	20.7	21.91	22
0.670591	-0.576495	0.299284	0.792819	0.837569	332.839	46	16.48	17.78	17.58	16.09	17.18	11.88	16.94	16.78	17.02	17.64	16.93	12.21	12.43	15.82	17.52	13.48	17.63	15.89	16.37	14.01	16.89	17.52	16.61	15.98	17.24	17.77	16.74	17.59	17.07	16.77	16.65	17.59	17.36	16.77	18.17	17.86	17.47	17.34	17.06	17.77	11.86	17.76	13.15
0.795845	-0.329441	0.157932	0.694957	0.837323	200.996	359.9	18.25	16.68	14.88	17.71	18.38	17.54	17.48	14.63	15.91	15.67	17.41	18.14	17.5	17.62	17.76	17.66	15.22	16.94	17.34	18	17.63	17.26	17.16	18.83	17.45	15.96	17.89	18.3	18.2	15.55	16.92	17.75	16.8	18.07	18.92	17.47	17.43	17.11	17.94	17.64	14.82	16.72	18.71
1.25909	0.332387	0.592175	0.902978	0.836963	257.303	369.4	17.48	17.36	16.91	17.05	17.38	17.11	18.35	17.11	18.51	16.95	13.62	16.22	17.23	17	16.48	17.3	14.56	15.9	16.84	17.38	17.17	16.75	16.56	16.1	17.71	16.91	14.36	17.29	15.52	17.54	16.8	18.85	15.92	15.91	16.63	16.8	16.75	17.17	14.1	17.11	16.78	16.4	18.05
0.558619	-0.840065	0.343602	0.805512	0.836662	127.039	254.5	18.4	9.82	10.17	14.32	17.95	18.74	17.57	17.82	17.63	17.35	17.49	17.28	17.64	10.47	17.32	19.37	10.66	17.28	17.4	16.49	17.18	18.74	17.83	10.88	18.32	16.63	17.72	16.57	17.14	17.78	18.07	17.19	18.33	18.41	18.44	12.84	18.1	17.18	17.46	18.93	9.86	17.46	18.04
0.816915	-0.291742	0.363952	0.811688	0.834965	283.994	37	17.27	17.19	15.3	16.33	16.41	15.9	16.47	14.93	16.05	15.23	15.77	14.68	17.27	16.14	15.15	14.39	15.6	17.07	17.88	17.05	16.71	16.54	15.55	17.2	16.97	15.93	15.95	13.66	15.53	16.06	16.59	16.71	15.34	16.18	16.55	16.59	16.45	17.68	16.23	16.29	15.61	16.22	17.46
0.762391	-0.391398	0.478977	0.867142	0.834843	1266.3	417.7	20.82	20.61	16.94	21.75	20.15	21.47	20.96	21.35	21.39	21.18	20.22	19.92	21.69	21.76	18.14	20.83	17.05	21.94	20.8	21.48	20.61	20.74	21.62	21.34	21.84	21.01	21	20.93	20.62	21.76	21.58	21.69	21.64	20.47	19.49	20.6	21.45	21.96	21.28	21.47	20.61	21.85	21.84
0.637052	-0.650516	0.305321	0.792819	0.834753	139.069	359.5	17.25	18.01	12.06	11.66	17.34	17.25	17.94	17.24	11.75	17.22	18.34	16.93	16.29	13.99	14.54	14.66	17.56	17.03	18.18	17.5	18.8	17.95	17.33	12.6	17.46	17.97	17.76	17.72	18.22	17.17	13.31	13.43	16.67	16.62	18.23	18.18	13.51	16.31	13.25	12.93	17.9	15.91	17.52
0.777842	-0.362452	0.268615	0.786816	0.834482	796.422	48.1	18.25	18.4	20.15	18.8	18.82	18.64	17.78	19.19	18.83	18.76	18.59	16.08	16.22	17.66	19.74	19.8	19.96	18.73	18.33	18.01	18.21	21.52	17.4	18.85	18	19.05	19.39	19.52	16.26	19.09	17.61	19.14	18.5	18.27	20.67	20.81	18.87	18.71	18.13	18.83	18.71	19.71	18.8
0.642641	-0.637914	0.437138	0.84218	0.834267	117.091	307.6	14.12	19.61	13.99	18.65	18.94	18.62	19.13	13.55	19.31	13.17	20.31	15.04	18.77	17.43	19.38	20.02	18.47	18.67	18.68	18.12	20.09	18.59	18.17	18.7	13.99	18.11	18.83	18.8	18.91	18.39	18.38	14.63	17.45	18.17	19.33	14.88	18.45	18.39	18.5	18.21	19.36	17.9	14.71
1.42076	0.506667	0.476599	0.864971	0.833498	455.164	374.4	15.69	16.17	15.51	13.9	11.29	15.43	14.55	13.79	11.57	14.96	12.55	15.44	16.05	16.83	15.67	16.74	15.08	15.04	15.44	15.47	14.51	15.48	14.36	12.37	12.3	16.17	14.38	15.19	14.71	14.52	13.15	13.22	14.31	11.72	14.84	13.29	11.64	11.12	12.99	12.66	15.02	15.49	16.75
1.28218	0.358602	0.443707	0.846067	0.833342	483.177	515.7	11.69	15.81	15.9	13.92	15.21	15.33	15.74	15.18	15.59	15.41	15.59	15.93	15.04	15.96	15.8	12.62	15.27	14.71	14.23	13.76	15.75	15.94	14.66	15.91	15.95	15.06	12.29	14.28	15.22	14.73	15.44	12.78	15.29	15.39	16.03	15.38	14.92	13.88	16.9	16.11	15.18	16.1	12.34
0.665721	-0.587011	0.246517	0.770904	0.833116	618.261	330.6	14.97	13.25	19.11	16.56	18.74	13.52	18.53	17.6	18.41	18.46	18.45	13.78	16.73	17.3	19.78	16.56	18.61	13.63	13.66	16.37	18.71	18.55	17.93	19.29	18.01	19.41	18.98	19.19	17.82	15.59	17.36	17.31	17.84	18.06	19.6	18.3	18.33	18.32	18.43	19.3	17.19	12.94	17.72
1.25572	0.328516	0.0823514	0.59444	0.831316	817.807	41	17.39	18.62	17.82	18.14	17.32	19.3	18.07	18.62	18.29	18.56	18.81	19.61	15.25	17.77	18.44	17.17	19.25	17.2	16.83	15.41	18.08	17.54	17.55	18.2	17.71	19.42	19.32	17.48	18.1	17.36	18.34	18.74	18.45	17.68	18.57	18.91	18.19	19.84	16.65	17.43	16.05	17.29	17.58
1.59316	0.671892	0.501547	0.871629	0.831279	802.414	48.3	18.51	17.87	18.75	19.67	19.06	15.35	20.21	19.95	19.25	18.11	16.38	13.89	14.18	18.22	19.98	17.43	14.33	13.74	15.91	14.55	18.8	14.57	19.08	15	18.45	19.61	15.84	17.68	13.95	18.05	18.32	19.8	19.04	18.74	19.17	17.88	20.04	19.17	19.16	18.83	13.57	17.06	14.68
1.47297	0.558731	0.358087	0.811688	0.830907	266.195	118.4	13.99	16.06	19	16.69	19.51	16.58	15.78	16.3	16.39	19.03	16.67	17.33	18.84	17.98	16.96	14.73	16.23	18.2	19.22	14.43	16.24	17.85	17.93	15.61	18.4	15.45	19.1	15.98	16.66	18.39	13.86	17.78	14.65	13.13	18.43	19.05	16.51	13.02	14.54	18.22	15.7	18.31	17.11
1.4566	0.542602	0.233326	0.752671	0.830811	304.229	325	16.11	16.05	17.18	17.32	18.35	15.84	16.98	16.45	16.43	15.36	17.14	16.21	16.76	15.45	16.33	13.31	16.55	16.45	16.52	16.55	11.43	15.83	15.91	16.84	15.71	11.52	15.98	15.77	18.59	16.53	17.69	18.45	16.86	15.88	11.23	17.62	16.08	17.44	18.3	11.83	16.7	15.5	17.99
1.71757	0.780366	0.372094	0.814736	0.829568	1102.44	307.3	17.83	19	19.47	16.75	19.34	17.39	19.58	18.72	11.95	17.12	18.09	11.64	20.75	19.3	18.14	12.65	19.09	19.15	16.9	19.7	19.06	12.57	17.45	11.95	17.35	18.37	17.51	17.69	18.08	16.89	16.87	12.82	11.05	18.64	14.03	17.57	18.88	19.83	15.99	18.97	15.05	17.43	18.27
1.45018	0.536237	0.211245	0.728905	0.829021	188.083	351.3	14.03	15.11	11.72	11.31	16.04	16.57	11.58	16.56	17.08	16.11	14.45	13.7	14.8	17.04	16.1	14.61	12.38	15.89	15.48	14.18	14.68	14.32	15.65	13.43	17.36	12.21	14.1	15.65	14.95	11.27	15.79	16.93	14.93	14	16.27	13.19	11.53	12.04	12.88	15.09	13.2	15.88	14.92
1.41575	0.50157	0.507304	0.871788	0.828886	636.293	483	14.96	14.43	13.37	16.09	12.12	14.57	10.73	12.43	12.96	14.56	11.68	14.29	15.56	13.5	15.73	11.99	16.8	14.22	13.21	14.14	11.36	12.02	15.67	11.47	14.06	11.43	12.7	12.58	13.63	11.93	12.27	12.28	10.73	15.35	15.09	13.31	12.62	13.06	16.42	11.69	15.4	13.12	11.72
0.568735	-0.814172	0.615353	0.907259	0.827138	533.281	382.1	11.17	15.23	17.35	18.41	17.36	15.94	13.66	14.97	16.61	10	11.66	17.19	16.03	16.59	11.34	14.99	17.83	18.89	16.3	17.47	11.34	15.7	16.51	14.63	15.32	17.27	11.81	9.47	14.21	18.2	16.65	17.01	15.71	16.67	11.1	12.31	17.96	16.69	15.64	18.05	10.66	18.14	16.96
0.740692	-0.433054	0.370114	0.811688	0.826382	514.654	47.6	18.36	18.16	15.49	17.98	20.21	19.78	17.35	18.86	18.1	17.03	18.41	15.55	15.72	16.89	17.24	16.17	18.64	17.67	18.56	18.38	18.66	19.08	18.28	17.63	18.68	19	16.72	20.56	15.67	20.31	18.37	19.52	16.81	18.95	19.6	19.54	18.06	16.93	16.71	17.87	15.44	15.14	18.35
0.793357	-0.333957	0.145044	0.677243	0.825261	147.983	588	20.75	19.3	17.49	20.1	20.02	17.48	19.59	18.51	19.29	20.39	19.49	17.61	19.66	19.67	17.71	17.85	17.56	19.86	20.26	19.88	20.18	17.65	19.81	19.82	20.35	19.96	19.61	19.94	20.02	17.26	19.99	19.44	17.43	19.58	20.26	20.85	17.29	19.83	19.77	20.59	19.88	19.74	20.47
1.5399	0.622839	0.261691	0.783832	0.824717	370.011	52.8	15.71	17.42	12.12	16.52	15.74	16.96	16.33	16.99	11.78	16.09	14.36	17.58	18.23	17.65	16.79	14.27	17.78	17.11	15.81	17.85	17.4	17.02	16.4	15.96	16.77	16.65	14.7	10.83	16.77	16.26	16.44	13.47	11.66	16.84	12.41	13.56	11.93	17.11	15.38	12.96	16.24	14.85	17.1
[truncated: 1,785 more rows]
[truncated: 3 more columns]
