# Supplementary material for: Plasma metabolomics reveals membrane lipids, aspartate/asparagine and nucleotide metabolism pathway differences associated with chloroquine resistance in Plasmodium vivax malaria
Source: PLoS One. 2017 Aug 16;12(8):e0182819. doi: 10.1371/journal.pone.0182819 (PMC5559093; doi:10.1371/journal.pone.0182819)
Supplement: S2 Table — (XLSX) [file pone.0182819.s002.xlsx]

## Sheet: S2 Table.txt
raw.fold.change (meanResistance/meanSusceptible)	log2.fold.change (meanResistant-meanSusceptible)	p-value	FDR.adjusted.P.value	VIP	mz	time	Annotation [Adduct|Isotope]	Confidence (based on Schymanski et al.)
0.284151	-1.81527	4.12556e-05	0.0203253	3.41203	1306.93	422.1
0.198748	-2.33099	2.01462e-05	0.0203253	3.26911	770.969	417.6
0.364372	-1.45652	0.00011338	0.0327625	3.19997	1515.98	417.2
0.168427	-2.56981	4.0015e-05	0.0203253	3.16957	511.357	453.5	LysoPC(17:0) [13C form of M+H]	Level 2
0.385274	-1.37604	4.66634e-05	0.0203253	3.12064	980.762	42.2
0.3603	-1.47273	0.000182698	0.0428497	3.07592	1075.76	41.9	NeuAcalpha2-3Galbeta-Cer(d18:122:0)	Level 3
0.425511	-1.23273	6.93287e-05	0.0264229	3.06983	645.501	462.5
0.305487	-1.71082	0.000375424	0.0572334	3.0229	516.306	383.9	PC(16:1) [M+Na]	Level 2
0.165977	-2.59095	0.000469292	0.0681093	3.01405	693.435	436.2
0.199353	-2.3266	0.000118199	0.0327625	2.99262	792.509	431.2
0.216576	-2.20705	0.000111025	0.0327625	2.9657	510.354	452.8	LysoPC(17:0) [M+H]	Level 2
0.341571	-1.54974	0.00102928	0.0871743	2.92491	276.653	416.2
0.388915	-1.36247	0.000302298	0.0572334	2.90628	822.685	584.9
0.352055	-1.50613	0.000329121	0.0572334	2.85897	338.341	551.1
3.90812	1.96647	0.000793921	0.07459	2.85478	600.504	459.7
0.237897	-2.07159	4.52596e-05	0.0203253	2.83448	755.584	586.5
0.283745	-1.81733	0.000355526	0.0572334	2.82175	1333.96	432
0.395893	-1.33682	0.000536118	0.0681093	2.8069	1133.6	431.7
0.346355	-1.52968	2.56669e-05	0.0203253	2.80146	761.048	49.5
0.329931	-1.59976	1.67509e-05	0.0203253	2.79243	804.608	515.7	Multiple matches to phosphoserines	Level 3
0.277579	-1.84903	0.000757647	0.07459	2.78835	882.518	374.4
0.435879	-1.198	0.000719402	0.07459	2.76909	987.194	51.1
0.331954	-1.59095	0.000233265	0.0508018	2.68024	803.807	41.5
0.343614	-1.54114	0.00112025	0.0898855	2.67679	353.012	65.1
2.43024	1.2811	0.00462522	0.17851	2.67151	612.247	434.5
3.92967	1.97441	0.0012208	0.090786	2.6653	644.492	399.6
0.422818	-1.24189	0.00206744	0.116734	2.65543	518.835	48.4
0.256435	-1.96333	0.000562541	0.0686075	2.62717	644.109	445.1
0.263013	-1.9268	0.000853491	0.07459	2.58815	561.878	40.9
0.438944	-1.18789	0.00145254	0.100655	2.56341	938.778	42
0.339525	-1.55841	0.000823552	0.07459	2.55704	105.954	588.3
0.360762	-1.47088	0.000712302	0.07459	2.55448	1447.9	482.8
0.322362	-1.63325	0.00436584	0.175151	2.52148	179.07	255.1	Multiple matches to unsaturated fatty acids	Level 3
3.21054	1.68282	0.00260212	0.135765	2.52054	832.781	43.6
0.467108	-1.09817	0.000609889	0.0715212	2.51047	296.65	417.3
0.305036	-1.71295	0.00109887	0.0898855	2.49275	199.123	571.1
0.372111	-1.42619	0.00492783	0.187812	2.48589	1005.69	445
0.0850663	-3.55527	0.00026134	0.0531217	2.48376	899.77	42.1
0.412502	-1.27753	0.0011975	0.090786	2.47456	996.691	417.1
0.441463	-1.17963	0.000856231	0.07459	2.46879	769.971	417.9
2.00953	1.00686	0.00407539	0.167697	2.46287	191.885	523.3
0.119105	-3.0697	0.00237508	0.129315	2.45396	483.362	456.3
0.320254	-1.64271	0.00276037	0.135765	2.44812	1176.26	424.3
3.28436	1.71561	0.00196625	0.116734	2.44704	859.491	463.3	Pectenotoxin 2	Level 3
0.298456	-1.74441	0.00447117	0.177047	2.39559	1469.58	300.2
0.268327	-1.89794	0.00194981	0.116734	2.37036	510.86	41.3
0.362638	-1.4634	0.00369255	0.163415	2.36384	199.123	358
0.250586	-1.99662	0.0015595	0.103368	2.33769	1110.79	41.6
2.35281	1.23439	0.000363859	0.0572334	2.32316	500.304	286.3	Tauroursodeoxycholic acid	Level 2
0.108448	-3.20492	0.00131714	0.0956178	2.31536	424.777	386.5
0.0490277	-4.35026	0.00276072	0.135765	2.30417	906.431	424.4
0.317801	-1.65381	0.00527368	0.198512	2.28264	952.824	41.6
0.258627	-1.95105	0.000649197	0.0733112	2.28028	688.524	519.4	Multiple matches to phosphocholines	Level 3
6.20107	2.63252	0.00369815	0.163415	2.25846	752.556	437.9	Multiple matches to phosphoethanolamines	Level 3
0.164742	-2.60172	0.00340486	0.159714	2.22926	340.284	489.1	N-(9Z-octadecenoyl)-glycine	Level 3
0.167086	-2.58133	0.00140864	0.0998827	2.21719	726.26	596.4
0.41166	-1.28047	0.00406336	0.167697	2.20693	437.238	530.1
0.34743	-1.5252	0.00300319	0.145345	2.16232	161.107	564.2	Multiple matches
0.481825	-1.05342	0.00360475	0.163415	2.12844	974.818	41.8
0.386678	-1.3708	0.000496932	0.0681093	2.11801	725.381	482.7
2.24215	1.16488	0.0015344	0.103368	2.09855	584.891	523.6
10.1611	3.34499	0.00197294	0.116734	2.07977	396.257	273.2
0.250075	-1.99957	0.00274888	0.135765	2.06552	728.465	445.6
0.44794	-1.15862	0.00391181	0.166971	1.97296	823.689	588.7	Multiple matches to triglycerides	Level 3
12.8961	3.68886	0.0039429	0.166971	1.97192	285.13	58.8
0.48366	-1.04794	0.00412505	0.167697	1.78176	240.232	330.8
3.03677	1.60254	0.00394104	0.166971	1.71345	423.783	576.5
3.20896	1.68211	0.00244584	0.130831	1.69723	621.302	351	1-Arachidonoylglycerophosphoinositol	Level 3
2.91115	1.54159	0.00354508	0.163415	1.60257	424.252	294.6
